# Supplementary material for: Inclusive Composite Interval Mapping of QTL by Environment Interactions in Biparental Populations
Source: PLoS One. 2015 Jul 10;10(7):e0132414. doi: 10.1371/journal.pone.0132414 (PMC4498613; doi:10.1371/journal.pone.0132414)
Supplement: S9 File — (XLSX) [file pone.0132414.s009.xlsx]

## Sheet: Fig.1
BC1	0.05		0.01			Fig. 1. LOD thresholds of QEI mapping based on empirical formula and simulation method.
	Simulation method	Empirical formula	Simulation-based	Empirical formula
e=1	2.5804	2.45557	3.33955	3.17232
e=2	3.3053	3.11261	4.22635	3.87852
e=3	3.81955	3.65123	4.5135	4.45637
e=4	4.4087	4.13464	5.45115	4.97378
e=5	4.722	4.58436	5.75095	5.45407
e=6	5.05355	5.01077	5.90505	5.90852
e=8	5.9533	5.81516	7.11545	6.76353
e=10	6.6901	6.57461	7.673	7.56828
F2	0.05		0.01
	Simulation-based	Empirical formula	Simulation-based	Empirical formula
e=1	3.4509	3.11261	4.3578	3.87852
e=2	4.27395	4.13464	5.31335	4.97378
e=3	5.32805	5.01077	6.54345	5.90852
e=4	6.1032	5.81516	7.1654	6.76353
e=5	7.01445	6.57461	7.81025	7.56828
e=6	7.54705	7.30245	9.181	8.33753
e=8	8.9938	8.69171	10.315	9.80119
e=10	10.2789	10.0187	12.5399	11.1945

## Sheet: Fig.2
		LOD	LODA	LODAE
Chrom	Position				MeanAdd	AbyE_01	AbyE_02	NumberQTL
1	0	4.1815	3.1898	0.9917	0.161	0.0015	-0.0015	0		Fig. 2. Average LOD profiles across 1000 simulation runs for the unlinked QTL model.
1	1	4.5406	3.4842	1.0565	0.1668	0.0017	-0.0017	0
1	2	4.8501	3.7323	1.1178	0.172	0.0018	-0.0018	0
1	3	5.1199	3.945	1.1749	0.1765	0.0019	-0.0019	0
1	4	5.3542	4.1272	1.2269	0.1806	0.002	-0.002	0
1	5	5.555	4.282	1.273	0.1841	0.0021	-0.0021	0
1	6	5.7236	4.4115	1.3122	0.1872	0.0022	-0.0022	0
1	7	5.8599	4.5164	1.3435	0.1898	0.0022	-0.0022	0
1	8	5.9623	4.5963	1.3659	0.192	0.0023	-0.0023	0
1	9	6.0264	4.6481	1.3783	0.1938	0.0023	-0.0023	0
1	10	6.0402	4.661	1.3792	0.1952	0.0024	-0.0024	0
1	11	14.3861	13.9279	0.4581	0.4279	-0.0004	0.0004	5
1	12	14.9331	14.4658	0.4673	0.4345	-0.0004	0.0004	15
1	13	15.3353	14.8609	0.4744	0.4393	-0.0004	0.0004	19
1	14	15.6165	15.137	0.4795	0.4427	-0.0005	0.0005	39
1	15	15.7885	15.3057	0.4827	0.4448	-0.0005	0.0005	48
1	16	15.8558	15.3718	0.4841	0.4459	-0.0006	0.0006	51
1	17	15.8167	15.3332	0.4834	0.4458	-0.0007	0.0007	40
1	18	15.6615	15.1809	0.4806	0.4445	-0.0008	0.0008	45
1	19	15.3689	14.8936	0.4752	0.4416	-0.0009	0.0009	21
1	20	14.8843	14.4175	0.4669	0.4368	-0.001	0.001	18
1	21	10.551	9.2375	1.3135	0.3167	-0.0039	0.0039	8
1	22	10.4123	9.1132	1.2991	0.3135	-0.0038	0.0038	0
1	23	10.2084	8.9328	1.2756	0.3097	-0.0038	0.0038	0
1	24	9.9456	8.7017	1.2439	0.3052	-0.0038	0.0038	0
1	25	9.6259	8.4208	1.2051	0.3	-0.0037	0.0037	0
1	26	9.2488	8.0888	1.16	0.2939	-0.0036	0.0036	0
1	27	8.8119	7.7023	1.1096	0.287	-0.0036	0.0036	0
1	28	8.3107	7.2561	1.0546	0.2791	-0.0035	0.0035	0
1	29	7.7381	6.7424	0.9957	0.27	-0.0034	0.0034	0
1	30	7.0777	6.1439	0.9337	0.2595	-0.0033	0.0033	0
1	31	0.7509	0.4058	0.3451	0.0274	-0.0015	0.0015	0
1	32	0.7506	0.4043	0.3463	0.0271	-0.0014	0.0014	0
1	33	0.7482	0.4018	0.3464	0.0268	-0.0013	0.0013	0
1	34	0.7442	0.3986	0.3456	0.0264	-0.0012	0.0012	0
1	35	0.7387	0.3947	0.344	0.0259	-0.0012	0.0012	0
1	36	0.7315	0.3899	0.3416	0.0254	-0.0011	0.0011	0
1	37	0.7225	0.384	0.3385	0.0248	-0.0009	0.0009	0
1	38	0.7109	0.3764	0.3345	0.0241	-0.0008	0.0008	0
1	39	0.696	0.3665	0.3295	0.0235	-0.0007	0.0007	0
1	40	0.676	0.3526	0.3234	0.0227	-0.0006	0.0006	0
1	41	0.387	0.2008	0.1862	0.0124	0.0009	-0.0009	0
1	42	0.3859	0.2006	0.1853	0.0122	0.0007	-0.0007	0
1	43	0.3853	0.2006	0.1847	0.0119	0.0006	-0.0006	0
1	44	0.3854	0.2009	0.1844	0.0116	0.0004	-0.0004	0
1	45	0.3862	0.2015	0.1847	0.0113	0.0002	-0.0002	0
1	46	0.3878	0.2023	0.1855	0.011	0.0001	-0.0001	0
1	47	0.39	0.2033	0.1868	0.0106	-0.0001	0.0001	0
1	48	0.3925	0.2042	0.1884	0.0102	-0.0003	0.0003	0
1	49	0.3951	0.2048	0.1903	0.0098	-0.0004	0.0004	0
1	50	0.3972	0.205	0.1922	0.0093	-0.0006	0.0006	0
1	51	0.3651	0.1939	0.1712	0.0079	-0.0006	0.0006	0
1	52	0.365	0.1943	0.1707	0.0077	-0.0007	0.0007	0
1	53	0.3654	0.195	0.1704	0.0075	-0.0008	0.0008	0
1	54	0.3665	0.1962	0.1704	0.0073	-0.0009	0.0009	0
1	55	0.3684	0.1977	0.1707	0.0071	-0.001	0.001	0
1	56	0.3712	0.1997	0.1715	0.0069	-0.001	0.001	0
1	57	0.3746	0.2021	0.1726	0.0066	-0.0011	0.0011	0
1	58	0.3785	0.2046	0.1739	0.0063	-0.0012	0.0012	0
1	59	0.3825	0.2072	0.1753	0.0061	-0.0012	0.0012	0
1	60	0.3863	0.2097	0.1766	0.0058	-0.0013	0.0013	0
1	61	0.3795	0.2046	0.1749	0.0054	-0.0015	0.0015	0
1	62	0.38	0.2048	0.1751	0.0053	-0.0016	0.0016	0
1	63	0.3808	0.2053	0.1756	0.0051	-0.0017	0.0017	0
1	64	0.3824	0.206	0.1764	0.0049	-0.0018	0.0018	0
1	65	0.3846	0.207	0.1776	0.0047	-0.0018	0.0018	0
1	66	0.3876	0.2083	0.1792	0.0045	-0.0019	0.0019	0
1	67	0.3912	0.21	0.1812	0.0043	-0.0019	0.0019	0
1	68	0.3952	0.2118	0.1834	0.0041	-0.002	0.002	0
1	69	0.3994	0.2136	0.1858	0.0038	-0.002	0.002	0
1	70	0.4033	0.2153	0.188	0.0036	-0.002	0.002	0
1	71	0.3906	0.2034	0.1871	0.0034	-0.0018	0.0018	0
1	72	0.3901	0.2025	0.1876	0.0036	-0.0017	0.0017	0
1	73	0.3897	0.2016	0.1882	0.0037	-0.0016	0.0016	0
1	74	0.3898	0.2009	0.189	0.0039	-0.0016	0.0016	0
1	75	0.3905	0.2004	0.19	0.004	-0.0015	0.0015	0
1	76	0.3917	0.2003	0.1914	0.0041	-0.0014	0.0014	0
1	77	0.3933	0.2004	0.1929	0.0042	-0.0013	0.0013	0
1	78	0.3954	0.2008	0.1945	0.0043	-0.0012	0.0012	0
1	79	0.3975	0.2014	0.1961	0.0044	-0.0011	0.0011	0
1	80	0.3994	0.2019	0.1975	0.0045	-0.001	0.001	0
1	81	0.4012	0.2042	0.197	0.0047	-0.0007	0.0007	0
1	82	0.3993	0.2039	0.1954	0.0046	-0.0006	0.0006	0
1	83	0.3976	0.2037	0.1939	0.0045	-0.0005	0.0005	0
1	84	0.3965	0.2038	0.1927	0.0044	-0.0004	0.0004	0
1	85	0.396	0.2042	0.1918	0.0043	-0.0004	0.0004	0
1	86	0.3961	0.2049	0.1912	0.0042	-0.0003	0.0003	0
1	87	0.397	0.2059	0.191	0.0041	-0.0002	0.0002	0
1	88	0.3983	0.2072	0.1911	0.0039	-0.0001	0.0001	0
1	89	0.3999	0.2084	0.1914	0.0038	0	0	0
1	90	0.4013	0.2096	0.1917	0.0036	0.0001	-0.0001	0
1	91	0.3993	0.2083	0.1909	0.0036	0	0	0
1	92	0.3971	0.207	0.1901	0.0035	-0.0001	0.0001	0
1	93	0.3949	0.2056	0.1893	0.0035	-0.0002	0.0002	0
1	94	0.3931	0.2045	0.1886	0.0034	-0.0003	0.0003	0
1	95	0.3918	0.2036	0.1882	0.0033	-0.0004	0.0004	0
1	96	0.3911	0.203	0.1881	0.0032	-0.0004	0.0004	0
1	97	0.3909	0.2027	0.1883	0.0031	-0.0005	0.0005	0
1	98	0.3912	0.2026	0.1886	0.003	-0.0006	0.0006	0
1	99	0.3916	0.2026	0.189	0.0029	-0.0007	0.0007	0
1	100	0.3919	0.2025	0.1894	0.0027	-0.0008	0.0008	0
1	101	0.39	0.2018	0.1882	0.0027	-0.0008	0.0008	0
1	102	0.3899	0.2024	0.1874	0.0026	-0.0008	0.0008	0
1	103	0.3903	0.2033	0.187	0.0025	-0.0008	0.0008	0
1	104	0.3915	0.2045	0.187	0.0025	-0.0008	0.0008	0
1	105	0.3935	0.2061	0.1875	0.0024	-0.0009	0.0009	0
1	106	0.3964	0.2079	0.1885	0.0023	-0.0009	0.0009	0
1	107	0.4	0.21	0.19	0.0022	-0.0009	0.0009	0
1	108	0.4042	0.2123	0.1919	0.0021	-0.0009	0.0009	0
1	109	0.4085	0.2146	0.1939	0.002	-0.0009	0.0009	0
1	110	0.4127	0.2166	0.196	0.0019	-0.0009	0.0009	0
1	111	0.4135	0.2167	0.1968	0.0019	-0.0008	0.0008	0
1	112	0.4139	0.2164	0.1975	0.0018	-0.0007	0.0007	0
1	113	0.4142	0.216	0.1982	0.0017	-0.0006	0.0006	0
1	114	0.4147	0.2156	0.1991	0.0016	-0.0005	0.0005	0
1	115	0.4153	0.2152	0.2001	0.0016	-0.0004	0.0004	0
1	116	0.4162	0.2148	0.2014	0.0015	-0.0003	0.0003	0
1	117	0.4172	0.2145	0.2027	0.0014	-0.0001	0.0001	0
1	118	0.4182	0.2142	0.204	0.0013	0	0	0
1	119	0.4189	0.2137	0.2052	0.0012	0.0001	-0.0001	0
1	120	0.4192	0.2131	0.2061	0.0011	0.0002	-0.0002	0
1	121	0.4169	0.212	0.2049	0.0009	0.0002	-0.0002	0
1	122	0.4168	0.2125	0.2043	0.0009	0.0004	-0.0004	0
1	123	0.4169	0.2132	0.2038	0.0009	0.0006	-0.0006	0
1	124	0.4174	0.2139	0.2034	0.0008	0.0008	-0.0008	0
1	125	0.4183	0.2149	0.2034	0.0008	0.001	-0.001	0
1	126	0.4197	0.216	0.2037	0.0008	0.0012	-0.0012	0
1	127	0.4215	0.2172	0.2043	0.0008	0.0014	-0.0014	0
1	128	0.4236	0.2185	0.2051	0.0008	0.0016	-0.0016	0
1	129	0.4256	0.2197	0.206	0.0007	0.0017	-0.0017	0
1	130	0.4273	0.2206	0.2067	0.0007	0.0019	-0.0019	0
1	131	0.4295	0.2216	0.2079	0.0007	0.002	-0.002	0
1	132	0.4301	0.2217	0.2084	0.0007	0.0021	-0.0021	0
1	133	0.4305	0.2217	0.2088	0.0008	0.0021	-0.0021	0
1	134	0.4311	0.2218	0.2093	0.0009	0.0021	-0.0021	0
1	135	0.4318	0.2221	0.2097	0.001	0.0021	-0.0021	0
1	136	0.4328	0.2225	0.2103	0.001	0.0021	-0.0021	0
1	137	0.4339	0.2231	0.2108	0.0011	0.0022	-0.0022	0
1	138	0.4351	0.2238	0.2113	0.0011	0.0022	-0.0022	0
1	139	0.4361	0.2244	0.2116	0.0012	0.0021	-0.0021	0
1	140	0.4365	0.2248	0.2117	0.0013	0.0021	-0.0021	0
1	141	0.4393	0.2273	0.2121	0.0012	0.0021	-0.0021	0
1	142	0.4396	0.2279	0.2117	0.0012	0.0019	-0.0019	0
1	143	0.4398	0.2284	0.2114	0.0012	0.0018	-0.0018	0
1	144	0.4402	0.229	0.2112	0.0012	0.0016	-0.0016	0
1	145	0.4408	0.2297	0.2112	0.0012	0.0014	-0.0014	0
1	146	0.4419	0.2304	0.2114	0.0012	0.0013	-0.0013	0
1	147	0.4431	0.2313	0.2119	0.0013	0.0011	-0.0011	0
1	148	0.4445	0.2321	0.2124	0.0013	0.0009	-0.0009	0
1	149	0.4457	0.2327	0.213	0.0013	0.0007	-0.0007	0
2	0	15.9586	0.3439	15.6147	-0.0014	0.4591	-0.4591	46
2	1	16.3256	0.3472	15.9785	-0.0015	0.4617	-0.4617	56
2	2	16.4971	0.3483	16.1491	-0.0016	0.4625	-0.4625	55
2	3	16.5306	0.3487	16.1823	-0.0016	0.462	-0.462	69
2	4	16.4477	0.3486	16.0996	-0.0017	0.4603	-0.4603	52
2	5	16.2571	0.3478	15.9098	-0.0018	0.4576	-0.4576	30
2	6	15.9597	0.3463	15.614	-0.0018	0.4538	-0.4538	20
2	7	15.5502	0.3437	15.207	-0.0019	0.4487	-0.4487	25
2	8	15.0161	0.34	14.6767	-0.002	0.4421	-0.4421	3
2	9	14.3344	0.3339	14.0007	-0.0021	0.4336	-0.4336	0
2	10	13.4532	0.3219	13.1313	-0.0022	0.4226	-0.4226	0
2	11	4.2897	1.4161	2.8736	-0.0006	0.1427	-0.1427	0
2	12	4.2412	1.401	2.8402	-0.0007	0.1412	-0.1412	0
2	13	4.167	1.3795	2.7876	-0.0008	0.1394	-0.1394	0
2	14	4.0701	1.3522	2.7179	-0.0008	0.1373	-0.1373	0
2	15	3.9514	1.3192	2.6323	-0.0009	0.135	-0.135	0
2	16	3.8112	1.2795	2.5317	-0.001	0.1323	-0.1323	0
2	17	3.6485	1.2318	2.4168	-0.0011	0.1294	-0.1294	0
2	18	3.4618	1.1741	2.2878	-0.0012	0.1261	-0.1261	0
2	19	3.2479	1.103	2.1449	-0.0012	0.1225	-0.1225	0
2	20	2.998	1.0113	1.9867	-0.0013	0.1186	-0.1186	0
2	21	0.5023	0.2113	0.291	-0.0004	0.0264	-0.0264	0
2	22	0.5003	0.2098	0.2905	-0.0004	0.026	-0.026	0
2	23	0.498	0.2088	0.2892	-0.0004	0.0256	-0.0256	0
2	24	0.4957	0.2083	0.2874	-0.0005	0.0252	-0.0252	0
2	25	0.4936	0.2083	0.2853	-0.0005	0.0247	-0.0247	0
2	26	0.4915	0.2087	0.2828	-0.0005	0.0241	-0.0241	0
2	27	0.4893	0.2093	0.28	-0.0006	0.0235	-0.0235	0
2	28	0.4867	0.2099	0.2767	-0.0006	0.0228	-0.0228	0
2	29	0.4831	0.2102	0.273	-0.0006	0.0221	-0.0221	0
2	30	0.4781	0.2095	0.2686	-0.0007	0.0214	-0.0214	0
2	31	0.3449	0.1678	0.1771	-0.0004	0.0152	-0.0152	0
2	32	0.345	0.1679	0.1771	-0.0002	0.015	-0.015	0
2	33	0.3458	0.1685	0.1773	0.0001	0.0147	-0.0147	0
2	34	0.3476	0.1697	0.1779	0.0003	0.0144	-0.0144	0
2	35	0.3504	0.1716	0.1789	0.0005	0.0141	-0.0141	0
2	36	0.3543	0.1739	0.1803	0.0008	0.0137	-0.0137	0
2	37	0.3589	0.1767	0.1821	0.001	0.0134	-0.0134	0
2	38	0.364	0.1798	0.1842	0.0012	0.0129	-0.0129	0
2	39	0.3692	0.1828	0.1863	0.0014	0.0125	-0.0125	0
2	40	0.374	0.1856	0.1884	0.0016	0.0121	-0.0121	0
2	41	0.3361	0.1637	0.1724	0.0003	0.011	-0.011	0
2	42	0.3363	0.1636	0.1727	0.0003	0.0109	-0.0109	0
2	43	0.3372	0.1641	0.1732	0.0002	0.0109	-0.0109	0
2	44	0.339	0.1652	0.1739	0.0002	0.0108	-0.0108	0
2	45	0.3418	0.167	0.1748	0.0001	0.0106	-0.0106	0
2	46	0.3455	0.1694	0.1761	0.0001	0.0105	-0.0105	0
2	47	0.35	0.1724	0.1776	0.0001	0.0104	-0.0104	0
2	48	0.355	0.1758	0.1792	0.0001	0.0102	-0.0102	0
2	49	0.3604	0.1794	0.1809	0.0001	0.01	-0.01	0
2	50	0.3656	0.1831	0.1825	0.0001	0.0098	-0.0098	0
2	51	0.357	0.1766	0.1804	0	0.0095	-0.0095	0
2	52	0.3555	0.1756	0.1799	0	0.0092	-0.0092	0
2	53	0.3545	0.1747	0.1797	0	0.0088	-0.0088	0
2	54	0.3541	0.1741	0.18	-0.0001	0.0084	-0.0084	0
2	55	0.3546	0.1738	0.1809	-0.0001	0.008	-0.008	0
2	56	0.3561	0.1738	0.1823	-0.0001	0.0076	-0.0076	0
2	57	0.3583	0.1743	0.1841	-0.0002	0.0072	-0.0072	0
2	58	0.3613	0.175	0.1863	-0.0002	0.0067	-0.0067	0
2	59	0.3647	0.176	0.1887	-0.0002	0.0063	-0.0063	0
2	60	0.3682	0.1771	0.1911	-0.0003	0.0058	-0.0058	0
2	61	0.3745	0.1778	0.1967	0.0002	0.0059	-0.0059	0
2	62	0.3744	0.1782	0.1962	0.0003	0.0061	-0.0061	0
2	63	0.3747	0.1788	0.1959	0.0004	0.0062	-0.0062	0
2	64	0.3757	0.1799	0.1958	0.0004	0.0063	-0.0063	0
2	65	0.3775	0.1813	0.1961	0.0005	0.0064	-0.0064	0
2	66	0.38	0.1832	0.1968	0.0005	0.0065	-0.0065	0
2	67	0.3831	0.1854	0.1978	0.0006	0.0066	-0.0066	0
2	68	0.3868	0.1878	0.199	0.0006	0.0067	-0.0067	0
2	69	0.3906	0.1903	0.2003	0.0007	0.0068	-0.0068	0
2	70	0.3942	0.1926	0.2015	0.0007	0.0068	-0.0068	0
2	71	0.4023	0.1973	0.205	0.0009	0.0069	-0.0069	0
2	72	0.4028	0.1975	0.2053	0.0007	0.0068	-0.0068	0
2	73	0.4033	0.1978	0.2056	0.0005	0.0066	-0.0066	0
2	74	0.4043	0.1984	0.2059	0.0004	0.0065	-0.0065	0
2	75	0.4058	0.1993	0.2065	0.0002	0.0063	-0.0063	0
2	76	0.4077	0.2006	0.2072	0	0.0061	-0.0061	0
2	77	0.4101	0.2021	0.208	-0.0002	0.0059	-0.0059	0
2	78	0.4128	0.2039	0.2089	-0.0004	0.0057	-0.0057	0
2	79	0.4155	0.2058	0.2097	-0.0005	0.0055	-0.0055	0
2	80	0.4179	0.2076	0.2103	-0.0007	0.0053	-0.0053	0
2	81	0.4103	0.2055	0.2048	-0.001	0.0051	-0.0051	0
2	82	0.4098	0.2057	0.2041	-0.001	0.005	-0.005	0
2	83	0.4096	0.2061	0.2035	-0.0011	0.005	-0.005	0
2	84	0.41	0.2069	0.2031	-0.0011	0.005	-0.005	0
2	85	0.411	0.208	0.203	-0.0012	0.005	-0.005	0
2	86	0.4126	0.2094	0.2033	-0.0012	0.0049	-0.0049	0
2	87	0.4148	0.211	0.2038	-0.0012	0.0049	-0.0049	0
2	88	0.4174	0.2128	0.2046	-0.0013	0.0048	-0.0048	0
2	89	0.4201	0.2146	0.2055	-0.0013	0.0047	-0.0047	0
2	90	0.4225	0.2162	0.2063	-0.0013	0.0046	-0.0046	0
2	91	0.4173	0.2132	0.2041	-0.0018	0.0045	-0.0045	0
2	92	0.417	0.2134	0.2037	-0.0019	0.0045	-0.0045	0
2	93	0.417	0.2137	0.2033	-0.0019	0.0046	-0.0046	0
2	94	0.4176	0.2144	0.2032	-0.002	0.0046	-0.0046	0
2	95	0.4188	0.2154	0.2034	-0.002	0.0046	-0.0046	0
2	96	0.4206	0.2168	0.2039	-0.002	0.0046	-0.0046	0
2	97	0.4231	0.2185	0.2046	-0.0021	0.0046	-0.0046	0
2	98	0.426	0.2204	0.2056	-0.0021	0.0046	-0.0046	0
2	99	0.429	0.2223	0.2067	-0.0021	0.0046	-0.0046	0
2	100	0.4318	0.2242	0.2076	-0.0022	0.0045	-0.0045	0
2	101	0.4304	0.223	0.2074	-0.0024	0.0045	-0.0045	0
2	102	0.4292	0.2232	0.206	-0.0023	0.0044	-0.0044	0
2	103	0.428	0.2234	0.2047	-0.0022	0.0044	-0.0044	0
2	104	0.4273	0.2237	0.2036	-0.0021	0.0043	-0.0043	0
2	105	0.4271	0.2241	0.2029	-0.0021	0.0042	-0.0042	0
2	106	0.4275	0.2248	0.2027	-0.002	0.0041	-0.0041	0
2	107	0.4285	0.2257	0.2027	-0.0019	0.0041	-0.0041	0
2	108	0.4299	0.2267	0.2032	-0.0018	0.004	-0.004	0
2	109	0.4314	0.2276	0.2038	-0.0017	0.0038	-0.0038	0
2	110	0.4328	0.2284	0.2044	-0.0015	0.0037	-0.0037	0
2	111	0.4307	0.2281	0.2026	-0.0011	0.0037	-0.0037	0
2	112	0.4311	0.2283	0.2028	-0.001	0.0036	-0.0036	0
2	113	0.4316	0.2286	0.203	-0.0009	0.0035	-0.0035	0
2	114	0.4323	0.2291	0.2032	-0.0008	0.0034	-0.0034	0
2	115	0.4333	0.2298	0.2035	-0.0006	0.0033	-0.0033	0
2	116	0.4347	0.2308	0.2039	-0.0005	0.0032	-0.0032	0
2	117	0.4364	0.232	0.2044	-0.0004	0.0031	-0.0031	0
2	118	0.4382	0.2333	0.2049	-0.0003	0.003	-0.003	0
2	119	0.4398	0.2345	0.2053	-0.0001	0.0028	-0.0028	0
2	120	0.441	0.2356	0.2054	0	0.0027	-0.0027	0
2	121	0.4379	0.2342	0.2037	0	0.0029	-0.0029	0
2	122	0.4357	0.2325	0.2032	-0.0002	0.0028	-0.0028	0
2	123	0.4335	0.2307	0.2028	-0.0005	0.0028	-0.0028	0
2	124	0.4317	0.2291	0.2026	-0.0007	0.0027	-0.0027	0
2	125	0.4303	0.2276	0.2028	-0.0009	0.0026	-0.0026	0
2	126	0.4295	0.2263	0.2032	-0.0011	0.0025	-0.0025	0
2	127	0.4291	0.2252	0.204	-0.0013	0.0024	-0.0024	0
2	128	0.4291	0.2242	0.2049	-0.0016	0.0023	-0.0023	0
2	129	0.4292	0.2233	0.2059	-0.0018	0.0022	-0.0022	0
2	130	0.4291	0.2222	0.2069	-0.002	0.0021	-0.0021	0
2	131	0.4258	0.2214	0.2044	-0.0023	0.0021	-0.0021	0
2	132	0.4236	0.2208	0.2028	-0.0023	0.0021	-0.0021	0
2	133	0.4212	0.2201	0.2012	-0.0024	0.0021	-0.0021	0
2	134	0.4191	0.2192	0.1999	-0.0025	0.0021	-0.0021	0
2	135	0.4173	0.2184	0.1989	-0.0025	0.0021	-0.0021	0
2	136	0.4159	0.2177	0.1982	-0.0026	0.0021	-0.0021	0
2	137	0.4149	0.217	0.198	-0.0026	0.002	-0.002	0
2	138	0.4143	0.2163	0.198	-0.0027	0.002	-0.002	0
2	139	0.4137	0.2155	0.1983	-0.0027	0.0019	-0.0019	0
2	140	0.4131	0.2145	0.1986	-0.0028	0.0019	-0.0019	0
2	141	0.4187	0.2156	0.203	-0.0033	0.0021	-0.0021	0
2	142	0.4193	0.2151	0.2042	-0.0033	0.0021	-0.0021	0
2	143	0.4201	0.2146	0.2055	-0.0032	0.0021	-0.0021	0
2	144	0.4215	0.2145	0.207	-0.0032	0.0021	-0.0021	0
2	145	0.4234	0.2148	0.2086	-0.0031	0.0021	-0.0021	0
2	146	0.4258	0.2154	0.2104	-0.0031	0.0021	-0.0021	0
2	147	0.4287	0.2164	0.2123	-0.003	0.0021	-0.0021	0
2	148	0.4319	0.2177	0.2142	-0.0029	0.0021	-0.0021	0
2	149	0.435	0.2191	0.216	-0.0029	0.0021	-0.0021	0
3	0	0.4125	0.2103	0.2021	0.0022	-0.0027	0.0027	0
3	1	0.4086	0.2076	0.201	0.0024	-0.0028	0.0028	0
3	2	0.4045	0.2048	0.1997	0.0027	-0.0029	0.0029	0
3	3	0.4005	0.202	0.1985	0.0029	-0.003	0.003	0
3	4	0.397	0.1995	0.1975	0.0032	-0.0031	0.0031	0
3	5	0.3943	0.1974	0.1968	0.0034	-0.0032	0.0032	0
3	6	0.3923	0.1959	0.1965	0.0037	-0.0033	0.0033	0
3	7	0.3912	0.1948	0.1964	0.0039	-0.0034	0.0034	0
3	8	0.3909	0.1943	0.1966	0.0041	-0.0035	0.0035	0
3	9	0.391	0.1941	0.1969	0.0043	-0.0035	0.0035	0
3	10	0.3913	0.194	0.1973	0.0045	-0.0036	0.0036	0
3	11	0.5499	0.2908	0.2592	0.0112	-0.0097	0.0097	0
3	12	0.5575	0.2971	0.2604	0.0117	-0.01	0.01	0
3	13	0.5634	0.302	0.2614	0.0122	-0.0103	0.0103	0
3	14	0.5683	0.3061	0.2623	0.0126	-0.0105	0.0105	0
3	15	0.5726	0.3095	0.2631	0.013	-0.0108	0.0108	0
3	16	0.5764	0.3125	0.2639	0.0134	-0.011	0.011	0
3	17	0.5798	0.3151	0.2647	0.0138	-0.0111	0.0111	0
3	18	0.5826	0.3173	0.2653	0.0141	-0.0113	0.0113	0
3	19	0.5845	0.3189	0.2656	0.0144	-0.0114	0.0114	0
3	20	0.585	0.3196	0.2654	0.0146	-0.0115	0.0115	0
3	21	4.6975	2.5948	2.1026	0.1557	-0.1521	0.1521	0
3	22	5.041	2.7892	2.2518	0.1606	-0.1567	0.1567	0
3	23	5.3439	2.9524	2.3916	0.165	-0.161	0.161	0
3	24	5.6105	3.0907	2.5199	0.1691	-0.1649	0.1649	0
3	25	5.8427	3.2079	2.6347	0.1728	-0.1684	0.1684	0
3	26	6.0411	3.3068	2.7343	0.176	-0.1716	0.1716	0
3	27	6.2056	3.3891	2.8165	0.1789	-0.1745	0.1745	0
3	28	6.3348	3.4555	2.8793	0.1813	-0.177	0.177	0
3	29	6.4248	3.5045	2.9202	0.1833	-0.1791	0.1791	0
3	30	6.4656	3.5295	2.9361	0.1849	-0.1808	0.1808	0
3	31	8.0749	4.4024	3.6725	0.2246	-0.2199	0.2199	0
3	32	8.1461	4.4462	3.6999	0.2248	-0.2196	0.2196	0
3	33	8.1523	4.4541	3.6982	0.2243	-0.2189	0.2189	0
3	34	8.1037	4.4344	3.6692	0.2234	-0.2176	0.2176	0
3	35	8.0044	4.3898	3.6146	0.2219	-0.216	0.216	0
3	36	7.8554	4.3198	3.5355	0.22	-0.2139	0.2139	1
3	37	7.6548	4.2217	3.4331	0.2175	-0.2113	0.2113	0
3	38	7.3978	4.0896	3.3082	0.2145	-0.2083	0.2083	0
3	39	7.0736	3.9117	3.162	0.2109	-0.2048	0.2048	0
3	40	6.655	3.66	2.995	0.2068	-0.2009	0.2009	0
3	41	2.3095	1.248	1.0615	0.0739	-0.0679	0.0679	0
3	42	2.2893	1.2358	1.0535	0.0732	-0.0673	0.0673	0
3	43	2.2565	1.2178	1.0387	0.0724	-0.0665	0.0665	0
3	44	2.2125	1.1948	1.0177	0.0714	-0.0656	0.0656	0
3	45	2.158	1.1668	0.9912	0.0702	-0.0645	0.0645	0
3	46	2.0932	1.1334	0.9598	0.0689	-0.0633	0.0633	0
3	47	2.0178	1.0938	0.924	0.0674	-0.062	0.062	0
3	48	1.931	1.0468	0.8842	0.0657	-0.0605	0.0605	0
3	49	1.831	0.9902	0.8407	0.0639	-0.0589	0.0589	0
3	50	1.7135	0.9195	0.794	0.0619	-0.0572	0.0572	0
3	51	0.4782	0.2552	0.2231	0.017	-0.0124	0.0124	0
3	52	0.4769	0.255	0.2218	0.0168	-0.0123	0.0123	0
3	53	0.4751	0.2546	0.2205	0.0166	-0.0122	0.0122	0
3	54	0.4733	0.2541	0.2192	0.0163	-0.0121	0.0121	0
3	55	0.4715	0.2534	0.2181	0.016	-0.012	0.012	0
3	56	0.4698	0.2526	0.2172	0.0157	-0.0118	0.0118	0
3	57	0.4679	0.2514	0.2165	0.0153	-0.0116	0.0116	0
3	58	0.4657	0.2498	0.2159	0.0149	-0.0114	0.0114	0
3	59	0.4629	0.2475	0.2154	0.0145	-0.0111	0.0111	0
3	60	0.4587	0.2439	0.2148	0.014	-0.0108	0.0108	0
3	61	0.3896	0.1976	0.192	0.0104	-0.0075	0.0075	0
3	62	0.3904	0.1982	0.1923	0.0101	-0.0075	0.0075	0
3	63	0.3915	0.1989	0.1926	0.0099	-0.0075	0.0075	0
3	64	0.3931	0.1999	0.1932	0.0096	-0.0075	0.0075	0
3	65	0.3951	0.2011	0.194	0.0092	-0.0075	0.0075	0
3	66	0.3977	0.2026	0.1951	0.0089	-0.0075	0.0075	0
3	67	0.4006	0.2043	0.1963	0.0085	-0.0074	0.0074	0
3	68	0.4037	0.2061	0.1976	0.0081	-0.0073	0.0073	0
3	69	0.4067	0.2078	0.1989	0.0077	-0.0072	0.0072	0
3	70	0.4092	0.2093	0.1999	0.0073	-0.0071	0.0071	0
3	71	0.3978	0.2032	0.1947	0.0069	-0.0066	0.0066	0
3	72	0.3976	0.2036	0.194	0.0068	-0.0066	0.0066	0
3	73	0.3975	0.2041	0.1934	0.0068	-0.0065	0.0065	0
3	74	0.398	0.2048	0.1932	0.0068	-0.0064	0.0064	0
3	75	0.3991	0.2057	0.1933	0.0067	-0.0064	0.0064	0
3	76	0.4008	0.2069	0.1939	0.0066	-0.0063	0.0063	0
3	77	0.4031	0.2083	0.1948	0.0065	-0.0062	0.0062	0
3	78	0.4057	0.2098	0.196	0.0064	-0.006	0.006	0
3	79	0.4085	0.2113	0.1973	0.0063	-0.0059	0.0059	0
3	80	0.4111	0.2126	0.1985	0.0062	-0.0058	0.0058	0
3	81	0.4064	0.2109	0.1954	0.0058	-0.0055	0.0055	0
3	82	0.4043	0.2095	0.1948	0.0056	-0.0055	0.0055	0
3	83	0.4023	0.208	0.1943	0.0054	-0.0054	0.0054	0
3	84	0.4007	0.2067	0.194	0.0052	-0.0053	0.0053	0
3	85	0.3996	0.2057	0.194	0.005	-0.0052	0.0052	0
3	86	0.3991	0.2049	0.1943	0.0047	-0.0051	0.0051	0
3	87	0.3992	0.2044	0.1948	0.0045	-0.005	0.005	0
3	88	0.3997	0.2041	0.1956	0.0042	-0.0049	0.0049	0
3	89	0.4004	0.2039	0.1966	0.004	-0.0048	0.0048	0
3	90	0.4011	0.2036	0.1974	0.0037	-0.0046	0.0046	0
3	91	0.4033	0.2052	0.1981	0.0035	-0.0046	0.0046	0
3	92	0.4031	0.2052	0.1979	0.0034	-0.0045	0.0045	0
3	93	0.4029	0.2051	0.1979	0.0033	-0.0043	0.0043	0
3	94	0.403	0.205	0.1979	0.0033	-0.0041	0.0041	0
3	95	0.4034	0.2051	0.1982	0.0032	-0.004	0.004	0
3	96	0.4041	0.2053	0.1988	0.0031	-0.0038	0.0038	0
3	97	0.4052	0.2056	0.1996	0.0029	-0.0036	0.0036	0
3	98	0.4064	0.206	0.2004	0.0028	-0.0034	0.0034	0
3	99	0.4076	0.2063	0.2013	0.0027	-0.0032	0.0032	0
3	100	0.4083	0.2064	0.2019	0.0026	-0.003	0.003	0
3	101	0.4047	0.2053	0.1994	0.0024	-0.0029	0.0029	0
3	102	0.4044	0.2051	0.1993	0.0023	-0.0029	0.0029	0
3	103	0.4042	0.2051	0.1991	0.0021	-0.0028	0.0028	0
3	104	0.4042	0.2053	0.199	0.0019	-0.0027	0.0027	0
3	105	0.4046	0.2056	0.199	0.0018	-0.0026	0.0026	0
3	106	0.4054	0.2063	0.1991	0.0016	-0.0025	0.0025	0
3	107	0.4064	0.2071	0.1994	0.0014	-0.0024	0.0024	0
3	108	0.4077	0.208	0.1997	0.0012	-0.0022	0.0022	0
3	109	0.4088	0.2089	0.2	0.001	-0.0021	0.0021	0
3	110	0.4096	0.2095	0.2001	0.0008	-0.002	0.002	0
3	111	0.4017	0.2049	0.1967	0.0009	-0.0019	0.0019	0
3	112	0.3997	0.2034	0.1963	0.001	-0.0019	0.0019	0
3	113	0.3981	0.2021	0.196	0.001	-0.002	0.002	0
3	114	0.3972	0.2012	0.196	0.0011	-0.0021	0.0021	0
3	115	0.3971	0.2007	0.1963	0.0011	-0.0021	0.0021	0
3	116	0.3978	0.2007	0.1971	0.0012	-0.0022	0.0022	0
3	117	0.3992	0.2011	0.1981	0.0012	-0.0022	0.0022	0
3	118	0.4012	0.2019	0.1993	0.0013	-0.0022	0.0022	0
3	119	0.4035	0.2028	0.2007	0.0013	-0.0023	0.0023	0
3	120	0.4058	0.2039	0.2019	0.0014	-0.0023	0.0023	0
3	121	0.4114	0.2062	0.2052	0.0012	-0.0022	0.0022	0
3	122	0.4121	0.2078	0.2043	0.0013	-0.0021	0.0021	0
3	123	0.4131	0.2097	0.2035	0.0013	-0.002	0.002	0
3	124	0.4146	0.2119	0.2027	0.0013	-0.0018	0.0018	0
3	125	0.4166	0.2145	0.2021	0.0014	-0.0017	0.0017	0
3	126	0.4191	0.2173	0.2018	0.0014	-0.0016	0.0016	0
3	127	0.4221	0.2204	0.2017	0.0014	-0.0015	0.0015	0
3	128	0.4253	0.2235	0.2017	0.0014	-0.0014	0.0014	0
3	129	0.4284	0.2266	0.2018	0.0014	-0.0012	0.0012	0
3	130	0.4311	0.2293	0.2019	0.0014	-0.0011	0.0011	0
3	131	0.4341	0.2312	0.2028	0.0012	-0.0011	0.0011	0
3	132	0.4337	0.2308	0.203	0.0011	-0.0012	0.0012	0
3	133	0.4333	0.2302	0.2031	0.001	-0.0012	0.0012	0
3	134	0.4329	0.2296	0.2034	0.0009	-0.0013	0.0013	0
3	135	0.4328	0.229	0.2038	0.0007	-0.0014	0.0014	0
3	136	0.433	0.2286	0.2045	0.0006	-0.0015	0.0015	0
3	137	0.4334	0.2282	0.2053	0.0005	-0.0015	0.0015	0
3	138	0.4339	0.2278	0.2062	0.0004	-0.0016	0.0016	0
3	139	0.4343	0.2273	0.207	0.0003	-0.0016	0.0016	0
3	140	0.4342	0.2265	0.2076	0.0002	-0.0017	0.0017	0
3	141	0.4376	0.2298	0.2078	0.0005	-0.0017	0.0017	0
3	142	0.438	0.2307	0.2073	0.0005	-0.0015	0.0015	0
3	143	0.4384	0.2314	0.207	0.0004	-0.0013	0.0013	0
3	144	0.439	0.2322	0.2068	0.0004	-0.0011	0.0011	0
3	145	0.4398	0.233	0.2069	0.0003	-0.001	0.001	0
3	146	0.441	0.2338	0.2072	0.0003	-0.0008	0.0008	0
3	147	0.4425	0.2346	0.2079	0.0002	-0.0006	0.0006	0
3	148	0.4441	0.2353	0.2088	0.0001	-0.0004	0.0004	0
3	149	0.4456	0.2359	0.2097	0.0001	-0.0002	0.0002	0
4	0	0.5353	0.2863	0.249	0.0131	0.0117	-0.0117	0
4	1	0.5378	0.2873	0.2505	0.0135	0.0121	-0.0121	0
4	2	0.5383	0.2868	0.2514	0.0139	0.0125	-0.0125	0
4	3	0.5374	0.2855	0.2519	0.0142	0.0128	-0.0128	0
4	4	0.5357	0.2835	0.2521	0.0145	0.0131	-0.0131	0
4	5	0.5334	0.2813	0.2521	0.0148	0.0135	-0.0135	0
4	6	0.5309	0.279	0.2519	0.0151	0.0137	-0.0137	0
4	7	0.5281	0.2767	0.2515	0.0154	0.014	-0.014	0
4	8	0.5251	0.2743	0.2508	0.0156	0.0142	-0.0142	0
4	9	0.5216	0.2718	0.2498	0.0158	0.0144	-0.0144	0
4	10	0.5172	0.269	0.2482	0.0159	0.0145	-0.0145	0
4	11	2.4371	1.3353	1.1018	0.0837	0.0819	-0.0819	0
4	12	2.5928	1.4231	1.1698	0.0863	0.0844	-0.0844	0
4	13	2.7304	1.4969	1.2335	0.0888	0.0866	-0.0866	0
4	14	2.8518	1.5596	1.2922	0.091	0.0887	-0.0887	0
4	15	2.958	1.6129	1.3451	0.0931	0.0907	-0.0907	0
4	16	3.0491	1.6579	1.3912	0.0949	0.0924	-0.0924	0
4	17	3.1251	1.6953	1.4298	0.0965	0.0939	-0.0939	0
4	18	3.1851	1.7253	1.4598	0.0978	0.0953	-0.0953	0
4	19	3.227	1.7471	1.4799	0.099	0.0965	-0.0965	0
4	20	3.2463	1.7578	1.4885	0.0999	0.0974	-0.0974	0
4	21	7.4048	4.0588	3.346	0.2133	0.211	-0.211	0
4	22	7.6653	4.2013	3.464	0.2159	0.2135	-0.2135	0
4	23	7.8565	4.2992	3.5573	0.2179	0.2155	-0.2155	1
4	24	7.9903	4.3645	3.6258	0.2195	0.2171	-0.2171	0
4	25	8.072	4.4027	3.6693	0.2205	0.2182	-0.2182	0
4	26	8.1033	4.4161	3.6872	0.2211	0.2188	-0.2188	1
4	27	8.0831	4.404	3.6791	0.2211	0.219	-0.219	0
4	28	8.0066	4.3627	3.644	0.2207	0.2187	-0.2187	0
4	29	7.8629	4.2822	3.5808	0.2198	0.218	-0.218	0
4	30	7.6212	4.1338	3.4874	0.2184	0.2167	-0.2167	0
4	31	5.4699	2.966	2.5038	0.157	0.155	-0.155	0
4	32	5.3995	2.9278	2.4717	0.1553	0.1532	-0.1532	0
4	33	5.296	2.8751	2.4209	0.1532	0.1512	-0.1512	0
4	34	5.1628	2.809	2.3537	0.1508	0.1488	-0.1488	0
4	35	5.0012	2.7294	2.2718	0.1481	0.1461	-0.1461	0
4	36	4.8114	2.6347	2.1768	0.145	0.1431	-0.1431	0
4	37	4.5929	2.5227	2.0703	0.1416	0.1398	-0.1398	0
4	38	4.3439	2.39	1.9539	0.1379	0.1363	-0.1363	0
4	39	4.0603	2.2311	1.8292	0.1338	0.1324	-0.1324	0
4	40	3.7312	2.0333	1.6978	0.1294	0.1282	-0.1282	0
4	41	0.6403	0.3277	0.3126	0.0179	0.0165	-0.0165	0
4	42	0.6381	0.3263	0.3118	0.0177	0.0163	-0.0163	0
4	43	0.6345	0.3242	0.3103	0.0175	0.016	-0.016	0
4	44	0.6299	0.3215	0.3083	0.0172	0.0157	-0.0157	0
4	45	0.6245	0.3184	0.306	0.0169	0.0154	-0.0154	0
4	46	0.6183	0.3149	0.3035	0.0165	0.015	-0.015	0
4	47	0.6113	0.3107	0.3006	0.0161	0.0146	-0.0146	0
4	48	0.6032	0.3057	0.2975	0.0157	0.0142	-0.0142	0
4	49	0.5935	0.2996	0.2939	0.0152	0.0138	-0.0138	0
4	50	0.5814	0.2917	0.2897	0.0147	0.0133	-0.0133	0
4	51	0.4205	0.2084	0.2121	0.0082	0.0066	-0.0066	0
4	52	0.4211	0.209	0.2121	0.0081	0.0065	-0.0065	0
4	53	0.4217	0.2096	0.2121	0.0079	0.0063	-0.0063	0
4	54	0.4225	0.2103	0.2122	0.0077	0.0062	-0.0062	0
4	55	0.4237	0.2113	0.2124	0.0074	0.006	-0.006	0
4	56	0.4253	0.2126	0.2127	0.0072	0.0058	-0.0058	0
4	57	0.4271	0.2139	0.2131	0.0069	0.0056	-0.0056	0
4	58	0.4289	0.2153	0.2136	0.0066	0.0054	-0.0054	0
4	59	0.4305	0.2165	0.214	0.0063	0.0051	-0.0051	0
4	60	0.4314	0.2173	0.2141	0.006	0.0049	-0.0049	0
4	61	0.3959	0.198	0.1979	0.0043	0.0035	-0.0035	0
4	62	0.3956	0.1974	0.1982	0.0043	0.0035	-0.0035	0
4	63	0.3954	0.1969	0.1986	0.0042	0.0034	-0.0034	0
4	64	0.3958	0.1967	0.1991	0.0041	0.0034	-0.0034	0
4	65	0.3966	0.1969	0.1998	0.004	0.0034	-0.0034	0
4	66	0.3981	0.1974	0.2007	0.0039	0.0033	-0.0033	0
4	67	0.4	0.1982	0.2018	0.0037	0.0033	-0.0033	0
4	68	0.4022	0.1992	0.203	0.0036	0.0032	-0.0032	0
4	69	0.4044	0.2003	0.2041	0.0035	0.0032	-0.0032	0
4	70	0.4065	0.2013	0.2051	0.0033	0.0031	-0.0031	0
4	71	0.4076	0.2008	0.2067	0.0034	0.0029	-0.0029	0
4	72	0.4078	0.2013	0.2065	0.0035	0.0027	-0.0027	0
4	73	0.4083	0.202	0.2064	0.0035	0.0024	-0.0024	0
4	74	0.4093	0.2029	0.2064	0.0036	0.0022	-0.0022	0
4	75	0.4108	0.204	0.2068	0.0036	0.002	-0.002	0
4	76	0.4128	0.2055	0.2073	0.0037	0.0017	-0.0017	0
4	77	0.4153	0.2071	0.2082	0.0037	0.0015	-0.0015	0
4	78	0.4181	0.2089	0.2092	0.0037	0.0012	-0.0012	0
4	79	0.4208	0.2106	0.2102	0.0037	0.001	-0.001	0
4	80	0.4232	0.2121	0.211	0.0038	0.0007	-0.0007	0
4	81	0.4246	0.2138	0.2108	0.0037	0.0003	-0.0003	0
4	82	0.4253	0.214	0.2112	0.0037	0.0002	-0.0002	0
4	83	0.4261	0.2144	0.2117	0.0037	0	0	0
4	84	0.4272	0.2149	0.2123	0.0036	-0.0001	0.0001	0
4	85	0.4287	0.2157	0.2131	0.0036	-0.0002	0.0002	0
4	86	0.4307	0.2167	0.2141	0.0035	-0.0004	0.0004	0
4	87	0.4331	0.2179	0.2152	0.0035	-0.0005	0.0005	0
4	88	0.4356	0.2192	0.2164	0.0034	-0.0007	0.0007	0
4	89	0.438	0.2205	0.2175	0.0033	-0.0008	0.0008	0
4	90	0.4399	0.2215	0.2185	0.0032	-0.0009	0.0009	0
4	91	0.4332	0.2189	0.2143	0.0035	-0.0007	0.0007	0
4	92	0.4326	0.2185	0.2142	0.0035	-0.0007	0.0007	0
4	93	0.4322	0.2182	0.214	0.0035	-0.0008	0.0008	0
4	94	0.4322	0.2183	0.2138	0.0034	-0.0008	0.0008	0
4	95	0.4326	0.2188	0.2139	0.0034	-0.0008	0.0008	0
4	96	0.4336	0.2196	0.214	0.0034	-0.0008	0.0008	0
4	97	0.4351	0.2208	0.2143	0.0034	-0.0008	0.0008	0
4	98	0.4369	0.2223	0.2147	0.0034	-0.0008	0.0008	0
4	99	0.4388	0.2238	0.2149	0.0033	-0.0009	0.0009	0
4	100	0.4404	0.2253	0.215	0.0033	-0.0009	0.0009	0
4	101	0.4344	0.2215	0.2129	0.0032	-0.0006	0.0006	0
4	102	0.4314	0.22	0.2114	0.0031	-0.0002	0.0002	0
4	103	0.4285	0.2186	0.2099	0.003	0.0001	-0.0001	0
4	104	0.426	0.2175	0.2085	0.0029	0.0004	-0.0004	0
4	105	0.4241	0.2166	0.2075	0.0028	0.0008	-0.0008	0
4	106	0.4229	0.2162	0.2067	0.0027	0.0011	-0.0011	0
4	107	0.4224	0.2161	0.2063	0.0026	0.0014	-0.0014	0
4	108	0.4223	0.2162	0.2061	0.0025	0.0018	-0.0018	0
4	109	0.4226	0.2165	0.2061	0.0023	0.0021	-0.0021	0
4	110	0.4228	0.2168	0.2061	0.0022	0.0024	-0.0024	0
4	111	0.4256	0.2168	0.2088	0.0021	0.0028	-0.0028	0
4	112	0.4244	0.2152	0.2092	0.0022	0.0029	-0.0029	0
4	113	0.4232	0.2137	0.2096	0.0024	0.0029	-0.0029	0
4	114	0.4224	0.2123	0.21	0.0025	0.0029	-0.0029	0
4	115	0.4219	0.2113	0.2106	0.0026	0.0029	-0.0029	0
4	116	0.4219	0.2105	0.2114	0.0027	0.0029	-0.0029	0
4	117	0.4223	0.21	0.2123	0.0028	0.0029	-0.0029	0
4	118	0.423	0.2097	0.2132	0.0029	0.0029	-0.0029	0
4	119	0.4237	0.2096	0.2141	0.003	0.0029	-0.0029	0
4	120	0.4241	0.2094	0.2148	0.0031	0.0029	-0.0029	0
4	121	0.4266	0.2104	0.2162	0.0032	0.0032	-0.0032	0
4	122	0.4258	0.2106	0.2152	0.0031	0.0032	-0.0032	0
4	123	0.4249	0.2109	0.214	0.003	0.0033	-0.0033	0
4	124	0.424	0.2113	0.2127	0.0029	0.0033	-0.0033	0
4	125	0.4233	0.2118	0.2115	0.0028	0.0034	-0.0034	0
4	126	0.4228	0.2124	0.2104	0.0027	0.0034	-0.0034	0
4	127	0.4225	0.2132	0.2094	0.0026	0.0034	-0.0034	0
4	128	0.4223	0.2139	0.2084	0.0025	0.0035	-0.0035	0
4	129	0.422	0.2146	0.2074	0.0024	0.0035	-0.0035	0
4	130	0.4212	0.215	0.2062	0.0023	0.0035	-0.0035	0
4	131	0.4147	0.2121	0.2027	0.0023	0.003	-0.003	0
4	132	0.4119	0.2104	0.2015	0.0022	0.0028	-0.0028	0
4	133	0.4089	0.2086	0.2003	0.0021	0.0025	-0.0025	0
4	134	0.4062	0.2069	0.1993	0.002	0.0023	-0.0023	0
4	135	0.4038	0.2055	0.1984	0.0019	0.0021	-0.0021	0
4	136	0.402	0.2042	0.1978	0.0018	0.0018	-0.0018	0
4	137	0.4006	0.2032	0.1975	0.0017	0.0016	-0.0016	0
4	138	0.3996	0.2023	0.1973	0.0016	0.0014	-0.0014	0
4	139	0.3988	0.2016	0.1972	0.0015	0.0011	-0.0011	0
4	140	0.398	0.2009	0.1971	0.0014	0.0009	-0.0009	0
4	141	0.3978	0.2018	0.196	0.0009	0.0008	-0.0008	0
4	142	0.3984	0.2022	0.1962	0.0008	0.0008	-0.0008	0
4	143	0.3995	0.2029	0.1966	0.0007	0.0008	-0.0008	0
4	144	0.4011	0.2038	0.1973	0.0006	0.0008	-0.0008	0
4	145	0.4035	0.2051	0.1983	0.0005	0.0008	-0.0008	0
4	146	0.4065	0.2067	0.1998	0.0004	0.0008	-0.0008	0
4	147	0.4101	0.2087	0.2014	0.0003	0.0008	-0.0008	0
4	148	0.4141	0.2108	0.2033	0.0002	0.0008	-0.0008	0
4	149	0.4182	0.2129	0.2052	0.0001	0.0008	-0.0008	0
5	0	0.4031	0.2035	0.1995	0.0161	0.0008	-0.0008	0
5	1	0.3983	0.2022	0.1962	0.0166	0.0007	-0.0007	0
5	2	0.3929	0.2004	0.1925	0.0171	0.0005	-0.0005	0
5	3	0.3871	0.1985	0.1886	0.0175	0.0004	-0.0004	0
5	4	0.3816	0.1967	0.1849	0.0179	0.0003	-0.0003	0
5	5	0.3765	0.1951	0.1814	0.0183	0.0001	-0.0001	0
5	6	0.3722	0.1938	0.1783	0.0187	0	0	0
5	7	0.3685	0.1929	0.1757	0.019	-0.0002	0.0002	0
5	8	0.3657	0.1922	0.1735	0.0192	-0.0003	0.0003	0
5	9	0.3634	0.1916	0.1718	0.0194	-0.0005	0.0005	0
5	10	0.3614	0.1911	0.1704	0.0196	-0.0006	0.0006	0
5	11	0.6064	0.3407	0.2657	0.0293	-0.0008	0.0008	0
5	12	0.6166	0.3482	0.2684	0.0299	-0.0008	0.0008	0
5	13	0.6249	0.3542	0.2708	0.0305	-0.0008	0.0008	0
5	14	0.6319	0.3591	0.2728	0.0311	-0.0008	0.0008	0
5	15	0.6379	0.3634	0.2745	0.0316	-0.0008	0.0008	0
5	16	0.643	0.367	0.276	0.032	-0.0008	0.0008	0
5	17	0.6474	0.3701	0.2772	0.0323	-0.0007	0.0007	0
5	18	0.6507	0.3727	0.2781	0.0326	-0.0007	0.0007	0
5	19	0.6528	0.3744	0.2784	0.0327	-0.0007	0.0007	0
5	20	0.6528	0.3749	0.2779	0.0328	-0.0007	0.0007	0
5	21	5.9663	4.9651	1.0012	0.2173	0.0031	-0.0031	0
5	22	6.3964	5.3362	1.0602	0.2243	0.0032	-0.0032	0
5	23	6.7734	5.6579	1.1155	0.2304	0.0033	-0.0033	0
5	24	7.1023	5.9358	1.1665	0.2358	0.0034	-0.0034	0
5	25	7.3858	6.1737	1.2121	0.2405	0.0035	-0.0035	0
5	26	7.6253	6.3739	1.2515	0.2446	0.0036	-0.0036	0
5	27	7.8211	6.5374	1.2837	0.2481	0.0037	-0.0037	0
5	28	7.9712	6.6634	1.3078	0.251	0.0037	-0.0037	0
5	29	8.0704	6.7479	1.3225	0.2534	0.0038	-0.0038	0
5	30	8.1048	6.7784	1.3264	0.2553	0.0038	-0.0038	6
5	31	14.6497	14.1519	0.4977	0.43	0.0048	-0.0048	5
5	32	15.0656	14.5582	0.5075	0.4346	0.0046	-0.0046	19
5	33	15.3403	14.8259	0.5144	0.4376	0.0045	-0.0045	46
5	34	15.4966	14.9779	0.5187	0.4392	0.0043	-0.0043	34
5	35	15.5453	15.0248	0.5205	0.4396	0.0042	-0.0042	39
5	36	15.4898	14.9698	0.5199	0.439	0.004	-0.004	52
5	37	15.3267	14.8098	0.5169	0.4371	0.0039	-0.0039	44
5	38	15.0453	14.5341	0.5112	0.4339	0.0037	-0.0037	23
5	39	14.623	14.1203	0.5027	0.429	0.0036	-0.0036	11
5	40	14.0039	13.5128	0.4911	0.4219	0.0034	-0.0034	4
5	41	8.1713	6.8208	1.3505	0.2534	-0.0003	0.0003	0
5	42	8.0675	6.7312	1.3363	0.251	-0.0002	0.0002	0
5	43	7.912	6.5995	1.3125	0.2481	-0.0002	0.0002	0
5	44	7.71	6.4298	1.2802	0.2446	-0.0001	0.0001	0
5	45	7.4634	6.2229	1.2404	0.2405	0	0	0
5	46	7.1718	5.9777	1.1941	0.2358	0.0001	-0.0001	0
5	47	6.8335	5.6915	1.142	0.2304	0.0001	-0.0001	0
5	48	6.4457	5.3606	1.0851	0.2242	0.0002	-0.0002	0
5	49	6.0032	4.9791	1.0241	0.2171	0.0002	-0.0002	0
5	50	5.4935	4.5338	0.9597	0.2091	0.0002	-0.0002	0
5	51	0.7415	0.4565	0.285	0.0335	-0.0011	0.0011	0
5	52	0.7376	0.4542	0.2835	0.0331	-0.0011	0.0011	0
5	53	0.7318	0.4504	0.2813	0.0326	-0.0011	0.0011	0
5	54	0.7245	0.4457	0.2788	0.032	-0.0012	0.0012	0
5	55	0.716	0.4401	0.276	0.0314	-0.0012	0.0012	0
5	56	0.7064	0.4334	0.273	0.0307	-0.0012	0.0012	0
5	57	0.6953	0.4256	0.2697	0.0299	-0.0012	0.0012	0
5	58	0.6825	0.4162	0.2663	0.029	-0.0012	0.0012	0
5	59	0.6674	0.4049	0.2625	0.0281	-0.0011	0.0011	0
5	60	0.6489	0.3906	0.2583	0.0272	-0.0011	0.0011	0
5	61	0.3855	0.2108	0.1746	0.0159	-0.0001	0.0001	0
5	62	0.3852	0.2101	0.1752	0.0158	-0.0001	0.0001	0
5	63	0.3853	0.2093	0.176	0.0156	-0.0001	0.0001	0
5	64	0.3858	0.2088	0.1771	0.0154	0	0	0
5	65	0.3869	0.2084	0.1785	0.0151	0	0	0
5	66	0.3885	0.2082	0.1803	0.0148	0	0	0
5	67	0.3905	0.208	0.1824	0.0145	0	0	0
5	68	0.3926	0.2079	0.1847	0.0141	0.0001	-0.0001	0
5	69	0.3944	0.2075	0.1869	0.0137	0.0001	-0.0001	0
5	70	0.3957	0.2067	0.189	0.0133	0.0001	-0.0001	0
5	71	0.3466	0.178	0.1686	0.0113	-0.0002	0.0002	0
5	72	0.3468	0.1786	0.1683	0.0112	-0.0002	0.0002	0
5	73	0.3478	0.1794	0.1684	0.0111	-0.0003	0.0003	0
5	74	0.3497	0.1807	0.169	0.011	-0.0004	0.0004	0
5	75	0.3525	0.1823	0.1702	0.0109	-0.0004	0.0004	0
5	76	0.3563	0.1843	0.1719	0.0108	-0.0005	0.0005	0
5	77	0.3608	0.1866	0.1742	0.0106	-0.0006	0.0006	0
5	78	0.3659	0.189	0.1769	0.0104	-0.0006	0.0006	0
5	79	0.3712	0.1914	0.1798	0.0102	-0.0007	0.0007	0
5	80	0.3763	0.1936	0.1827	0.01	-0.0007	0.0007	0
5	81	0.3721	0.1925	0.1796	0.0098	-0.0008	0.0008	0
5	82	0.3718	0.1921	0.1798	0.0097	-0.0009	0.0009	0
5	83	0.3719	0.1918	0.1801	0.0096	-0.0009	0.0009	0
5	84	0.3726	0.1918	0.1808	0.0095	-0.0009	0.0009	0
5	85	0.3739	0.1922	0.1817	0.0094	-0.0009	0.0009	0
5	86	0.3759	0.193	0.183	0.0092	-0.0009	0.0009	0
5	87	0.3785	0.194	0.1845	0.009	-0.0009	0.0009	0
5	88	0.3815	0.1953	0.1862	0.0088	-0.0009	0.0009	0
5	89	0.3847	0.1967	0.188	0.0086	-0.0009	0.0009	0
5	90	0.3876	0.1979	0.1897	0.0084	-0.0009	0.0009	0
5	91	0.3815	0.1941	0.1873	0.0084	-0.0003	0.0003	0
5	92	0.3805	0.1931	0.1873	0.0083	-0.0003	0.0003	0
5	93	0.3797	0.1923	0.1874	0.0082	-0.0002	0.0002	0
5	94	0.3796	0.1918	0.1878	0.0082	-0.0001	0.0001	0
5	95	0.38	0.1916	0.1884	0.008	-0.0001	0.0001	0
5	96	0.3811	0.1918	0.1894	0.0079	0	0	0
5	97	0.3828	0.1922	0.1905	0.0078	0.0001	-0.0001	0
5	98	0.3849	0.193	0.1919	0.0076	0.0001	-0.0001	0
5	99	0.3871	0.1938	0.1933	0.0074	0.0002	-0.0002	0
5	100	0.3891	0.1946	0.1946	0.0072	0.0002	-0.0002	0
5	101	0.3881	0.193	0.1951	0.0074	0.0006	-0.0006	0
5	102	0.3873	0.1916	0.1957	0.0074	0.0005	-0.0005	0
5	103	0.387	0.1905	0.1965	0.0074	0.0005	-0.0005	0
5	104	0.3874	0.19	0.1974	0.0073	0.0004	-0.0004	0
5	105	0.3885	0.19	0.1985	0.0073	0.0003	-0.0003	0
5	106	0.3904	0.1906	0.1999	0.0072	0.0003	-0.0003	0
5	107	0.3931	0.1917	0.2014	0.007	0.0002	-0.0002	0
5	108	0.3962	0.1931	0.203	0.0069	0.0001	-0.0001	0
5	109	0.3995	0.1949	0.2046	0.0067	0.0001	-0.0001	0
5	110	0.4026	0.1966	0.2059	0.0066	0	0	0
5	111	0.402	0.1973	0.2047	0.0065	-0.0002	0.0002	0
5	112	0.4015	0.1971	0.2044	0.0063	-0.0002	0.0002	0
5	113	0.4013	0.1971	0.2042	0.0062	-0.0003	0.0003	0
5	114	0.4016	0.1973	0.2042	0.006	-0.0003	0.0003	0
5	115	0.4026	0.198	0.2046	0.0058	-0.0003	0.0003	0
5	116	0.4044	0.1991	0.2053	0.0056	-0.0003	0.0003	0
5	117	0.4069	0.2006	0.2063	0.0054	-0.0004	0.0004	0
5	118	0.4099	0.2024	0.2074	0.0052	-0.0004	0.0004	0
5	119	0.4131	0.2044	0.2086	0.005	-0.0004	0.0004	0
5	120	0.4162	0.2064	0.2098	0.0047	-0.0005	0.0005	0
5	121	0.4145	0.2069	0.2076	0.0046	-0.0008	0.0008	0
5	122	0.4147	0.2072	0.2075	0.0046	-0.0009	0.0009	0
5	123	0.4151	0.2077	0.2074	0.0047	-0.0011	0.0011	0
5	124	0.4159	0.2085	0.2074	0.0047	-0.0012	0.0012	0
5	125	0.4173	0.2096	0.2077	0.0047	-0.0013	0.0013	0
5	126	0.4191	0.2111	0.2081	0.0047	-0.0014	0.0014	0
5	127	0.4214	0.2127	0.2086	0.0047	-0.0016	0.0016	0
5	128	0.4238	0.2145	0.2093	0.0046	-0.0017	0.0017	0
5	129	0.4262	0.2163	0.2099	0.0046	-0.0018	0.0018	0
5	130	0.4281	0.2178	0.2104	0.0045	-0.0019	0.0019	0
5	131	0.432	0.2195	0.2125	0.0045	-0.0016	0.0016	0
5	132	0.4316	0.2194	0.2121	0.0045	-0.0017	0.0017	0
5	133	0.4313	0.2195	0.2118	0.0044	-0.0018	0.0018	0
5	134	0.4314	0.2198	0.2117	0.0044	-0.0019	0.0019	0
5	135	0.4321	0.2203	0.2118	0.0043	-0.002	0.002	0
5	136	0.4333	0.221	0.2123	0.0042	-0.0021	0.0021	0
5	137	0.4351	0.222	0.2131	0.0041	-0.0022	0.0022	0
5	138	0.4371	0.2231	0.214	0.004	-0.0023	0.0023	0
5	139	0.4392	0.2242	0.215	0.0038	-0.0024	0.0024	0
5	140	0.441	0.2252	0.2158	0.0037	-0.0024	0.0024	0
5	141	0.44	0.2253	0.2147	0.0037	-0.0024	0.0024	0
5	142	0.4387	0.2253	0.2134	0.0038	-0.0023	0.0023	0
5	143	0.4373	0.2253	0.2121	0.0038	-0.0022	0.0022	0
5	144	0.4362	0.2253	0.2109	0.0038	-0.0021	0.0021	0
5	145	0.4355	0.2256	0.2099	0.0039	-0.002	0.002	0
5	146	0.4352	0.226	0.2092	0.0039	-0.0019	0.0019	0
5	147	0.4353	0.2265	0.2088	0.0039	-0.0018	0.0018	0
5	148	0.4356	0.227	0.2086	0.0039	-0.0017	0.0017	0
5	149	0.4359	0.2274	0.2084	0.0039	-0.0016	0.0016	0
6	0	0.4275	0.2059	0.2217	0.0031	0.0011	-0.0011	0
6	1	0.4265	0.2062	0.2203	0.0031	0.0008	-0.0008	0
6	2	0.4251	0.2065	0.2186	0.0031	0.0006	-0.0006	0
6	3	0.4239	0.207	0.2169	0.0031	0.0004	-0.0004	0
6	4	0.4229	0.2078	0.2151	0.0031	0.0001	-0.0001	0
6	5	0.4224	0.2089	0.2136	0.0031	-0.0001	0.0001	0
6	6	0.4225	0.2103	0.2122	0.003	-0.0003	0.0003	0
6	7	0.423	0.2119	0.2111	0.003	-0.0006	0.0006	0
6	8	0.4239	0.2137	0.2102	0.003	-0.0008	0.0008	0
6	9	0.4249	0.2155	0.2094	0.0029	-0.001	0.001	0
6	10	0.4258	0.2172	0.2086	0.0029	-0.0012	0.0012	0
6	11	0.4257	0.2156	0.2102	0.0027	-0.0011	0.0011	0
6	12	0.4263	0.2153	0.211	0.0026	-0.0011	0.0011	0
6	13	0.427	0.2151	0.2119	0.0026	-0.0011	0.0011	0
6	14	0.4281	0.2152	0.2129	0.0025	-0.0011	0.0011	0
6	15	0.4296	0.2156	0.214	0.0024	-0.0011	0.0011	0
6	16	0.4315	0.2163	0.2152	0.0024	-0.001	0.001	0
6	17	0.4337	0.2172	0.2165	0.0023	-0.001	0.001	0
6	18	0.4361	0.2183	0.2178	0.0022	-0.001	0.001	0
6	19	0.4383	0.2194	0.2189	0.0021	-0.001	0.001	0
6	20	0.44	0.2204	0.2196	0.002	-0.0009	0.0009	0
6	21	0.4386	0.2193	0.2193	0.002	-0.001	0.001	0
6	22	0.4368	0.2179	0.2189	0.0021	-0.0011	0.0011	0
6	23	0.435	0.2164	0.2186	0.0021	-0.0012	0.0012	0
6	24	0.4334	0.215	0.2184	0.0021	-0.0012	0.0012	0
6	25	0.4321	0.2136	0.2185	0.0021	-0.0013	0.0013	0
6	26	0.4314	0.2125	0.2188	0.0021	-0.0014	0.0014	0
6	27	0.431	0.2116	0.2194	0.0021	-0.0014	0.0014	0
6	28	0.431	0.2109	0.2201	0.0021	-0.0015	0.0015	0
6	29	0.4311	0.2102	0.2208	0.0021	-0.0015	0.0015	0
6	30	0.431	0.2096	0.2214	0.0021	-0.0016	0.0016	0
6	31	0.4312	0.2089	0.2223	0.0021	-0.0014	0.0014	0
6	32	0.4292	0.2073	0.2219	0.002	-0.0014	0.0014	0
6	33	0.4273	0.2058	0.2215	0.002	-0.0014	0.0014	0
6	34	0.4257	0.2044	0.2213	0.0019	-0.0013	0.0013	0
6	35	0.4246	0.2033	0.2213	0.0018	-0.0013	0.0013	0
6	36	0.4241	0.2025	0.2215	0.0017	-0.0012	0.0012	0
6	37	0.424	0.202	0.222	0.0016	-0.0011	0.0011	0
6	38	0.4243	0.2018	0.2225	0.0015	-0.0011	0.0011	0
6	39	0.4248	0.2017	0.2231	0.0014	-0.001	0.001	0
6	40	0.425	0.2016	0.2235	0.0013	-0.0009	0.0009	0
6	41	0.4295	0.2053	0.2242	0.001	-0.0012	0.0012	0
6	42	0.4286	0.2048	0.2237	0.0008	-0.0012	0.0012	0
6	43	0.4277	0.2046	0.2231	0.0006	-0.0011	0.0011	0
6	44	0.427	0.2048	0.2222	0.0004	-0.0011	0.0011	0
6	45	0.4267	0.2054	0.2214	0.0003	-0.0011	0.0011	0
6	46	0.4269	0.2064	0.2205	0.0001	-0.001	0.001	0
6	47	0.4275	0.2079	0.2196	-0.0001	-0.001	0.001	0
6	48	0.4283	0.2097	0.2186	-0.0003	-0.001	0.001	0
6	49	0.4292	0.2115	0.2176	-0.0005	-0.0009	0.0009	0
6	50	0.4297	0.2134	0.2164	-0.0007	-0.0009	0.0009	0
6	51	0.4283	0.2153	0.213	-0.0009	-0.0011	0.0011	0
6	52	0.4281	0.216	0.2121	-0.0011	-0.001	0.001	0
6	53	0.4281	0.2169	0.2113	-0.0013	-0.001	0.001	0
6	54	0.4287	0.218	0.2107	-0.0015	-0.0009	0.0009	0
6	55	0.4298	0.2195	0.2103	-0.0016	-0.0008	0.0008	0
6	56	0.4315	0.2212	0.2103	-0.0018	-0.0007	0.0007	0
6	57	0.4337	0.2231	0.2106	-0.002	-0.0007	0.0007	0
6	58	0.4362	0.2251	0.2111	-0.0021	-0.0006	0.0006	0
6	59	0.4388	0.2271	0.2117	-0.0023	-0.0005	0.0005	0
6	60	0.441	0.2287	0.2122	-0.0024	-0.0005	0.0005	0
6	61	0.437	0.2265	0.2106	-0.0023	-0.0002	0.0002	0
6	62	0.4355	0.2262	0.2093	-0.0023	-0.0003	0.0003	0
6	63	0.4338	0.2258	0.208	-0.0022	-0.0003	0.0003	0
6	64	0.4322	0.2253	0.2069	-0.0022	-0.0004	0.0004	0
6	65	0.4308	0.2248	0.206	-0.0021	-0.0005	0.0005	0
6	66	0.4299	0.2244	0.2054	-0.0021	-0.0005	0.0005	0
6	67	0.4292	0.2241	0.2051	-0.002	-0.0006	0.0006	0
6	68	0.4288	0.2237	0.205	-0.0019	-0.0007	0.0007	0
6	69	0.4284	0.2233	0.2051	-0.0019	-0.0007	0.0007	0
6	70	0.4278	0.2227	0.2051	-0.0018	-0.0008	0.0008	0
6	71	0.4258	0.2231	0.2027	-0.002	-0.0003	0.0003	0
6	72	0.4245	0.2227	0.2019	-0.002	-0.0002	0.0002	0
6	73	0.4234	0.2222	0.2012	-0.0021	0	0	0
6	74	0.4226	0.2218	0.2008	-0.0021	0.0001	-0.0001	0
6	75	0.4223	0.2215	0.2008	-0.0022	0.0003	-0.0003	0
6	76	0.4225	0.2213	0.2012	-0.0022	0.0004	-0.0004	0
6	77	0.4232	0.2213	0.2019	-0.0023	0.0006	-0.0006	0
6	78	0.4243	0.2214	0.2029	-0.0023	0.0007	-0.0007	0
6	79	0.4254	0.2215	0.204	-0.0023	0.0009	-0.0009	0
6	80	0.4263	0.2213	0.205	-0.0024	0.001	-0.001	0
6	81	0.4215	0.2187	0.2027	-0.0025	0.0012	-0.0012	0
6	82	0.4198	0.2176	0.2021	-0.0026	0.0013	-0.0013	0
6	83	0.4182	0.2166	0.2016	-0.0027	0.0015	-0.0015	0
6	84	0.4169	0.2157	0.2012	-0.0028	0.0017	-0.0017	0
6	85	0.4161	0.2151	0.201	-0.0028	0.0018	-0.0018	0
6	86	0.4158	0.2147	0.2011	-0.0029	0.002	-0.002	0
6	87	0.4161	0.2146	0.2015	-0.003	0.0021	-0.0021	0
6	88	0.4168	0.2147	0.2021	-0.003	0.0023	-0.0023	0
6	89	0.4177	0.2149	0.2027	-0.0031	0.0024	-0.0024	0
6	90	0.4185	0.2151	0.2034	-0.0031	0.0026	-0.0026	0
6	91	0.4233	0.2153	0.2079	-0.0034	0.0026	-0.0026	0
6	92	0.4236	0.2156	0.208	-0.0034	0.0026	-0.0026	0
6	93	0.4239	0.216	0.208	-0.0033	0.0026	-0.0026	0
6	94	0.4245	0.2164	0.2081	-0.0033	0.0026	-0.0026	0
6	95	0.4253	0.2169	0.2084	-0.0032	0.0026	-0.0026	0
6	96	0.4265	0.2177	0.2088	-0.0031	0.0025	-0.0025	0
6	97	0.4279	0.2185	0.2093	-0.0031	0.0025	-0.0025	0
6	98	0.4294	0.2194	0.21	-0.003	0.0025	-0.0025	0
6	99	0.4308	0.2203	0.2106	-0.0029	0.0025	-0.0025	0
6	100	0.4318	0.2208	0.211	-0.0028	0.0024	-0.0024	0
6	101	0.4345	0.2214	0.2131	-0.0028	0.0026	-0.0026	0
6	102	0.4352	0.2207	0.2145	-0.0027	0.0027	-0.0027	0
6	103	0.4358	0.22	0.2158	-0.0026	0.0028	-0.0028	0
6	104	0.4365	0.2194	0.2171	-0.0025	0.0029	-0.0029	0
6	105	0.4374	0.219	0.2184	-0.0024	0.003	-0.003	0
6	106	0.4385	0.2189	0.2196	-0.0022	0.003	-0.003	0
6	107	0.4398	0.219	0.2208	-0.0021	0.0031	-0.0031	0
6	108	0.4411	0.2192	0.2218	-0.0019	0.0031	-0.0031	0
6	109	0.4421	0.2196	0.2225	-0.0018	0.0032	-0.0032	0
6	110	0.4427	0.2199	0.2228	-0.0016	0.0032	-0.0032	0
6	111	0.4403	0.2208	0.2196	-0.0009	0.0028	-0.0028	0
6	112	0.4406	0.221	0.2196	-0.0008	0.0028	-0.0028	0
6	113	0.4409	0.2213	0.2195	-0.0008	0.0027	-0.0027	0
6	114	0.4413	0.2219	0.2194	-0.0007	0.0027	-0.0027	0
6	115	0.4421	0.2227	0.2194	-0.0006	0.0026	-0.0026	0
6	116	0.4431	0.2237	0.2194	-0.0005	0.0026	-0.0026	0
6	117	0.4443	0.2249	0.2194	-0.0004	0.0025	-0.0025	0
6	118	0.4455	0.2261	0.2194	-0.0003	0.0025	-0.0025	0
6	119	0.4466	0.2273	0.2192	-0.0002	0.0024	-0.0024	0
6	120	0.4471	0.2283	0.2188	-0.0002	0.0023	-0.0023	0
6	121	0.4482	0.2304	0.2177	-0.0003	0.002	-0.002	0
6	122	0.4477	0.2311	0.2167	-0.0004	0.0018	-0.0018	0
6	123	0.4472	0.2315	0.2157	-0.0005	0.0017	-0.0017	0
6	124	0.4466	0.2319	0.2147	-0.0006	0.0015	-0.0015	0
6	125	0.4463	0.2323	0.214	-0.0007	0.0013	-0.0013	0
6	126	0.4461	0.2326	0.2135	-0.0008	0.0011	-0.0011	0
6	127	0.4461	0.2329	0.2133	-0.0009	0.0009	-0.0009	0
6	128	0.4462	0.2331	0.2131	-0.001	0.0008	-0.0008	0
6	129	0.446	0.233	0.213	-0.0011	0.0006	-0.0006	0
6	130	0.4454	0.2326	0.2128	-0.0012	0.0004	-0.0004	0
6	131	0.4429	0.2313	0.2116	-0.0013	0.0007	-0.0007	0
6	132	0.4423	0.2305	0.2118	-0.0012	0.0007	-0.0007	0
6	133	0.4414	0.2295	0.2119	-0.0011	0.0007	-0.0007	0
6	134	0.4404	0.2284	0.2121	-0.001	0.0008	-0.0008	0
6	135	0.4397	0.2273	0.2124	-0.0009	0.0008	-0.0008	0
6	136	0.4391	0.2262	0.2129	-0.0008	0.0008	-0.0008	0
6	137	0.4386	0.2252	0.2134	-0.0007	0.0009	-0.0009	0
6	138	0.4383	0.2242	0.2141	-0.0006	0.0009	-0.0009	0
6	139	0.4377	0.2231	0.2146	-0.0005	0.0009	-0.0009	0
6	140	0.4368	0.2218	0.215	-0.0004	0.0009	-0.0009	0
6	141	0.4424	0.2265	0.2159	-0.0004	0.0011	-0.0011	0
6	142	0.4421	0.2267	0.2153	-0.0005	0.0013	-0.0013	0
6	143	0.4416	0.227	0.2147	-0.0006	0.0016	-0.0016	0
6	144	0.4413	0.2273	0.214	-0.0006	0.0018	-0.0018	0
6	145	0.4411	0.2277	0.2134	-0.0007	0.002	-0.002	0
6	146	0.4413	0.2282	0.213	-0.0007	0.0022	-0.0022	0
6	147	0.4416	0.2289	0.2127	-0.0008	0.0024	-0.0024	0
6	148	0.4421	0.2297	0.2125	-0.0009	0.0026	-0.0026	0
6	149	0.4425	0.2303	0.2122	-0.0009	0.0028	-0.0028	0

## Sheet: Fig.3
Chrom		MarkerName	Power	0.975262
1	5	MK-1-1	5.1
1	15	MK-1-2	83.4		Fig. 3. Power analysis by marker interval for the unlinked QTL model.
1	25	MK-1-3	14
1	35	MK-1-4	1.1
1	45	MK-1-5	0.5
1	55	MK-1-6	0.2
1	65	MK-1-7	0.2
1	75	MK-1-8	0
1	85	MK-1-9	0.1
1	95	MK-1-10	0.1
1	105	MK-1-11	0
1	115	MK-1-12	0.3
1	125	MK-1-13	0
1	135	MK-1-14	0
1	145	MK-1-15	0.1
2	5	MK-2-1	99
2	15	MK-2-2	2.1
2	25	MK-2-3	1.1
2	35	MK-2-4	0.4
2	45	MK-2-5	0.2
2	55	MK-2-6	0.1
2	65	MK-2-7	0
2	75	MK-2-8	0.3
2	85	MK-2-9	0.2
2	95	MK-2-10	0
2	105	MK-2-11	0.1
2	115	MK-2-12	0.1
2	125	MK-2-13	0
2	135	MK-2-14	0
2	145	MK-2-15	0.2
3	5	MK-3-1	0.5
3	15	MK-3-2	0.8
3	25	MK-3-3	13.9
3	35	MK-3-4	79.4
3	45	MK-3-5	4.6
3	55	MK-3-6	1
3	65	MK-3-7	0.3
3	75	MK-3-8	0.2
3	85	MK-3-9	0.1
3	95	MK-3-10	0.2
3	105	MK-3-11	0.3
3	115	MK-3-12	0
3	125	MK-3-13	0.1
3	135	MK-3-14	0.2
3	145	MK-3-15	0.1
4	5	MK-4-1	1
4	15	MK-4-2	5
4	25	MK-4-3	73.1
4	35	MK-4-4	19.2
4	45	MK-4-5	1
4	55	MK-4-6	0.4
4	65	MK-4-7	0.3
4	75	MK-4-8	0.2
4	85	MK-4-9	0.4
4	95	MK-4-10	0
4	105	MK-4-11	0
4	115	MK-4-12	0.1
4	125	MK-4-13	0.1
4	135	MK-4-14	0.1
4	145	MK-4-15	0.1
5	5	MK-5-1	0.5
5	15	MK-5-2	0.8
5	25	MK-5-3	6.4
5	35	MK-5-4	87.7
5	45	MK-5-5	7.8
5	55	MK-5-6	0.9
5	65	MK-5-7	0.5
5	75	MK-5-8	0.3
5	85	MK-5-9	0.2
5	95	MK-5-10	0.1
5	105	MK-5-11	0
5	115	MK-5-12	0.2
5	125	MK-5-13	0.1
5	135	MK-5-14	0.1
5	145	MK-5-15	0.1
6	5	MK-6-1	0.1
6	15	MK-6-2	0
6	25	MK-6-3	0
6	35	MK-6-4	0
6	45	MK-6-5	0
6	55	MK-6-6	0.2
6	65	MK-6-7	0.2
6	75	MK-6-8	0.2
6	85	MK-6-9	0
6	95	MK-6-10	0
6	105	MK-6-11	0.3
6	115	MK-6-12	0.1
6	125	MK-6-13	0.1
6	135	MK-6-14	0.1
6	145	MK-6-15	0.1

## Sheet: Fig.4
		LOD	LODA	LODAE			LOD	LODA	LODAE			LOD	LODA	LODAE
model 1	Position				model 1	Position				model1	Position						Fig. 4. Average LOD profiles on chromosome 1 across 1000 simulation runs for the linked QTL model.
	0	0.6585	0.2758	0.3828		0	0.5726	0.2768	0.2958		0	0.4278	0.225	0.2027
0.1	1	0.6773	0.2824	0.3949	0.5	1	0.5849	0.2818	0.3031	0.8	1	0.4274	0.2282	0.1993
	2	0.6944	0.288	0.4063		2	0.5946	0.2852	0.3095		2	0.4254	0.2299	0.1955
	3	0.7099	0.2931	0.4169		3	0.6027	0.2874	0.3153		3	0.4228	0.2309	0.1919
	4	0.7239	0.2975	0.4264		4	0.6095	0.2889	0.3207		4	0.42	0.2315	0.1886
	5	0.7364	0.3015	0.4349		5	0.6154	0.2898	0.3256		5	0.4177	0.232	0.1857
	6	0.7472	0.3051	0.4421		6	0.6205	0.2904	0.3301		6	0.4158	0.2325	0.1834
	7	0.7561	0.3082	0.448		7	0.6248	0.2908	0.334		7	0.4147	0.233	0.1817
	8	0.7629	0.3107	0.4522		8	0.6282	0.2909	0.3372		8	0.4142	0.2335	0.1806
	9	0.7671	0.3123	0.4548		9	0.6303	0.2907	0.3396		9	0.414	0.2338	0.1802
	10	0.768	0.3126	0.4554		10	0.6304	0.2898	0.3407		10	0.4137	0.2336	0.1801
	11	2.347	0.5147	1.8323		11	11.3717	1.6101	9.7618		11	26.12	1.6849	24.4358
	12	2.495	0.5358	1.9592		12	12.3417	1.731	10.611		12	28.7435	1.8641	26.8802
	13	2.6299	0.5535	2.0763		13	13.1405	1.8168	11.3239		13	30.7644	1.9835	28.7815
	14	2.751	0.5685	2.1825		14	13.8085	1.8817	11.9269		14	32.3817	2.0676	30.3145
	15	2.8577	0.5812	2.2765		15	14.3692	1.9331	12.4362		15	33.704	2.1298	31.5744
	16	2.9491	0.5919	2.3572		16	14.8373	1.9755	12.8618		16	34.7946	2.1777	32.617
	17	3.0245	0.6007	2.4237		17	15.2212	2.0119	13.2094		17	35.6892	2.2157	33.4735
	18	3.0824	0.6074	2.475		18	15.5236	2.0439	13.4798		18	36.402	2.2463	34.1557
	19	3.121	0.6115	2.5095		19	15.738	2.0713	13.6667		19	36.9179	2.2692	34.6486
	20	3.1371	0.6117	2.5254		20	15.8243	2.0864	13.7379		20	37.0587	2.2754	34.7833
	21	5.3059	0.637	4.6689		21	34.4822	0.8379	33.6455		21	86.5406	0.7977	85.7442
	22	5.4496	0.6579	4.7917		22	35.7029	0.8684	34.8353		22	90.1027	0.8134	89.29
	23	5.5528	0.6748	4.878		23	36.4233	0.8863	35.5376		23	91.8548	0.8221	91.0331
	24	5.6183	0.6886	4.9297		24	36.8137	0.899	35.9152		24	92.72	0.8285	91.8919
	25	5.6474	0.6998	4.9476		25	36.9399	0.9096	36.0309		25	92.9754	0.8336	92.1419
	26	5.6405	0.7086	4.9319		26	36.821	0.9195	35.902		26	92.6884	0.8383	91.8503
	27	5.5972	0.7147	4.8825		27	36.44	0.9291	35.5114		27	91.7888	0.8429	90.9462
	28	5.516	0.7175	4.7984		28	35.7339	0.9378	34.7969		28	89.9948	0.8477	89.1475
	29	5.3936	0.7159	4.6777		29	34.5378	0.9414	33.5974		29	86.3683	0.8535	85.5159
	30	5.2225	0.7072	4.5152		30	32.0824	0.9004	31.182		30	71.9717	0.7656	71.2063
	31	4.241	0.9335	3.3075		31	19.0181	3.1756	15.8426		31	38.206	3.4965	34.7095
	32	4.2381	0.9459	3.2922		32	18.8196	3.1727	15.6469		32	37.7409	3.4955	34.2454
	33	4.2076	0.9529	3.2547		33	18.5109	3.1543	15.3566		33	37.073	3.4797	33.5934
	34	4.1524	0.9556	3.1968		34	18.1029	3.1235	14.9794		34	36.221	3.4514	32.7697
	35	4.0739	0.9546	3.1194		35	17.5937	3.08	14.5138		35	35.1716	3.4085	31.7633
	36	3.9733	0.9498	3.0235		36	16.9735	3.0213	13.9523		36	33.8891	3.3454	30.544
	37	3.8511	0.9411	2.91		37	16.224	2.9428	13.2815		37	32.3078	3.2515	29.0569
	38	3.7076	0.9279	2.7796		38	15.3157	2.8365	12.4795		38	30.3097	3.1061	27.2044
	39	3.5424	0.9094	2.633		39	14.1981	2.6885	11.51		39	27.6624	2.8657	24.7975
	40	3.3536	0.8837	2.4699		40	12.7313	2.4602	10.271		40	23.7202	2.4586	21.2616
	41	2.2336	1.2443	0.9893		41	6.7519	5.0252	1.7267		41	10.8655	9.0915	1.7739
	42	2.281	1.2807	1.0003		42	7.1345	5.332	1.8025		42	11.6647	9.7839	1.8808
	43	2.3157	1.3098	1.006		43	7.4505	5.581	1.8695		43	12.3104	10.3302	1.9802
	44	2.3387	1.3323	1.0064		44	7.7151	5.7884	1.9267		44	12.8509	10.7803	2.0705
	45	2.3505	1.3489	1.0016		45	7.9353	5.962	1.9734		45	13.3074	11.1569	2.1504
	46	2.3511	1.3596	0.9915		46	8.114	6.1056	2.0084		46	13.6904	11.4719	2.2184
	47	2.34	1.3639	0.9761		47	8.2514	6.2203	2.031		47	14.0038	11.7309	2.2729
	48	2.3165	1.3612	0.9553		48	8.3444	6.3043	2.0401		48	14.246	11.9338	2.3123
	49	2.2792	1.35	0.9291		49	8.3843	6.35	2.0343		49	14.4051	12.0708	2.3343
	50	2.2252	1.328	0.8972		50	8.3406	6.3294	2.0112		50	14.4209	12.0855	2.3354
	51	2.0162	1.3408	0.6753		51	10.2528	7.795	2.4578		51	27.2987	23.653	3.6458
	52	2.0459	1.3636	0.6823		52	10.4992	7.9899	2.5093		52	28.1598	24.4098	3.75
	53	2.0641	1.3782	0.6859		53	10.6472	8.104	2.5433		53	28.6449	24.8202	3.8247
	54	2.0717	1.3857	0.6861		54	10.719	8.159	2.56		54	28.8936	25.0225	3.8711
	55	2.0693	1.3864	0.6829		55	10.7233	8.1635	2.5598		55	28.9532	25.0637	3.8896
	56	2.057	1.3805	0.6766		56	10.6617	8.1191	2.5426		56	28.8354	24.955	3.8803
	57	2.0346	1.3674	0.6672		57	10.5305	8.0217	2.5088		57	28.5248	24.6814	3.8434
	58	2.0014	1.3466	0.6548		58	10.3186	7.8601	2.4585		58	27.9688	24.1901	3.7787
	59	1.9563	1.3167	0.6395		59	9.9993	7.6075	2.3918		59	27.0153	23.33	3.6853
	60	1.897	1.2755	0.6216		60	9.4852	7.1766	2.3086		60	24.6831	21.1221	3.561
	61	1.202	0.7473	0.4546		61	3.9176	2.8536	1.064		61	11.9813	9.724	2.2573
	62	1.1917	0.7417	0.45		62	3.8654	2.8175	1.0478		62	11.7926	9.5668	2.2258
	63	1.176	0.7324	0.4436		63	3.7896	2.7646	1.025		63	11.532	9.3547	2.1773
	64	1.1556	0.7198	0.4357		64	3.6933	2.697	0.9963		64	11.2083	9.094	2.1144
	65	1.131	0.7044	0.4266		65	3.5779	2.6152	0.9626		65	10.8229	8.7841	2.0388
	66	1.1028	0.6862	0.4166		66	3.4435	2.5189	0.9246		66	10.3729	8.4204	1.9525
	67	1.071	0.6653	0.4058		67	3.2897	2.4066	0.883		67	9.851	7.994	1.857
	68	1.0358	0.6415	0.3943		68	3.1146	2.2759	0.8387		68	9.243	7.4887	1.7542
	69	0.9969	0.6145	0.3824		69	2.9143	2.122	0.7923		69	8.5164	6.8704	1.646
	70	0.9538	0.5836	0.3701		70	2.6773	1.9326	0.7447		70	7.5521	6.0181	1.534
	71	0.578	0.3039	0.2741		71	0.498	0.2491	0.2489		71	0.4697	0.2485	0.2212
	72	0.5764	0.3039	0.2725		72	0.4981	0.2485	0.2496		72	0.4693	0.2485	0.2208
	73	0.5738	0.3033	0.2705		73	0.4976	0.2475	0.25		73	0.4686	0.2483	0.2203
	74	0.5704	0.3023	0.2681		74	0.4967	0.2465	0.2502		74	0.4679	0.248	0.2199
	75	0.5666	0.301	0.2656		75	0.4957	0.2454	0.2502		75	0.4674	0.2477	0.2197
	76	0.5623	0.2993	0.2629		76	0.4945	0.2443	0.2501		76	0.467	0.2473	0.2197
	77	0.5576	0.2974	0.2601		77	0.493	0.2431	0.2499		77	0.4666	0.2468	0.2198
	78	0.5524	0.2951	0.2573		78	0.491	0.2416	0.2494		78	0.466	0.2459	0.2201
	79	0.5465	0.2923	0.2542		79	0.4882	0.2395	0.2487		79	0.4648	0.2444	0.2204
	80	0.5398	0.2887	0.251		80	0.4842	0.2366	0.2476		80	0.4625	0.2419	0.2206
	81	0.4851	0.2469	0.2382		81	0.4357	0.2044	0.2313		81	0.3887	0.1892	0.1995
	82	0.4852	0.2461	0.2391		82	0.4356	0.2032	0.2324		82	0.3873	0.1881	0.1992
	83	0.4848	0.2451	0.2397		83	0.4354	0.2019	0.2335		83	0.3862	0.187	0.1992
	84	0.4843	0.2442	0.2401		84	0.4353	0.2007	0.2346		84	0.3857	0.186	0.1997
	85	0.4837	0.2433	0.2404		85	0.4355	0.1998	0.2357		85	0.3857	0.1851	0.2007
	86	0.4831	0.2424	0.2407		86	0.436	0.1991	0.2369		86	0.3864	0.1843	0.2021
	87	0.4824	0.2416	0.2408		87	0.4368	0.1986	0.2382		87	0.3878	0.1838	0.204
	88	0.4815	0.2407	0.2408		88	0.4377	0.1983	0.2393		88	0.3895	0.1833	0.2062
	89	0.4802	0.2396	0.2406		89	0.4383	0.198	0.2403		89	0.3913	0.1828	0.2085
	90	0.478	0.238	0.2401		90	0.4384	0.1974	0.2411		90	0.393	0.1821	0.2109
	91	0.4486	0.2166	0.232		91	0.4197	0.1892	0.2305		91	0.3806	0.1724	0.2082
	92	0.4461	0.2156	0.2305		92	0.4178	0.1877	0.23		92	0.3805	0.1722	0.2083
	93	0.4435	0.2147	0.2288		93	0.416	0.1864	0.2296		93	0.3809	0.1721	0.2087
	94	0.4411	0.214	0.2272		94	0.4146	0.1854	0.2292		94	0.3819	0.1724	0.2095
	95	0.4392	0.2135	0.2256		95	0.4138	0.1849	0.2289		95	0.3836	0.173	0.2106
	96	0.4377	0.2135	0.2242		96	0.4136	0.1848	0.2287		96	0.3861	0.174	0.2121
	97	0.4366	0.2137	0.2229		97	0.4139	0.1852	0.2287		97	0.3892	0.1754	0.2138
	98	0.436	0.2142	0.2218		98	0.4146	0.1859	0.2287		98	0.3927	0.1769	0.2158
	99	0.4355	0.2148	0.2207		99	0.4154	0.1868	0.2286		99	0.3963	0.1786	0.2178
	100	0.4348	0.2152	0.2196		100	0.416	0.1877	0.2283		100	0.3997	0.18	0.2197
	101	0.4358	0.2184	0.2174		101	0.3959	0.1743	0.2216		101	0.392	0.1718	0.2203
	102	0.4359	0.2183	0.2176		102	0.3935	0.174	0.2195		102	0.3921	0.1714	0.2208
	103	0.4358	0.2181	0.2178		103	0.3914	0.174	0.2174		103	0.3925	0.1711	0.2214
	104	0.4358	0.2179	0.2179		104	0.3899	0.1745	0.2154		104	0.3935	0.1712	0.2223
	105	0.4361	0.2179	0.2182		105	0.3891	0.1754	0.2137		105	0.395	0.1717	0.2233
	106	0.4365	0.218	0.2185		106	0.3892	0.1769	0.2122		106	0.3972	0.1726	0.2246
	107	0.4372	0.2183	0.2189		107	0.39	0.1789	0.2111		107	0.3999	0.1739	0.226
	108	0.4378	0.2187	0.2192		108	0.3915	0.1812	0.2103		108	0.4029	0.1754	0.2275
	109	0.4383	0.2189	0.2194		109	0.3933	0.1837	0.2096		109	0.4061	0.1771	0.229
	110	0.4383	0.219	0.2193		110	0.3953	0.1862	0.2091		110	0.4089	0.1787	0.2303
	111	0.4351	0.2164	0.2187		111	0.393	0.1848	0.2082		111	0.4108	0.1798	0.231
	112	0.4355	0.2159	0.2196		112	0.3931	0.1848	0.2083		112	0.41	0.1796	0.2305
	113	0.4359	0.2154	0.2206		113	0.3936	0.1849	0.2087		113	0.4094	0.1794	0.23
	114	0.4366	0.215	0.2216		114	0.3947	0.1853	0.2094		114	0.409	0.1794	0.2296
	115	0.4376	0.2147	0.2228		115	0.3966	0.186	0.2105		115	0.409	0.1796	0.2294
	116	0.4389	0.2147	0.2242		116	0.3992	0.1872	0.212		116	0.4095	0.1801	0.2294
	117	0.4406	0.2149	0.2257		117	0.4024	0.1886	0.2138		117	0.4104	0.1809	0.2295
	118	0.4424	0.2152	0.2272		118	0.406	0.1903	0.2157		118	0.4115	0.1818	0.2297
	119	0.4441	0.2155	0.2286		119	0.4098	0.1921	0.2177		119	0.4128	0.1828	0.23
	120	0.4455	0.2156	0.2298		120	0.4134	0.1938	0.2196		120	0.4137	0.1835	0.2302
	121	0.4501	0.2174	0.2327		121	0.4121	0.1923	0.2198		121	0.4131	0.1849	0.2281
	122	0.4476	0.2158	0.2317		122	0.41	0.1918	0.2182		122	0.4115	0.1845	0.227
	123	0.445	0.2143	0.2307		123	0.4079	0.1913	0.2166		123	0.4101	0.1841	0.226
	124	0.4426	0.2129	0.2297		124	0.4062	0.191	0.2152		124	0.409	0.1838	0.2252
	125	0.4405	0.2118	0.2287		125	0.405	0.191	0.214		125	0.4085	0.1838	0.2248
	126	0.4388	0.2109	0.228		126	0.4043	0.1913	0.2131		126	0.4086	0.184	0.2247
	127	0.4376	0.2103	0.2273		127	0.4042	0.1918	0.2124		127	0.4093	0.1845	0.2248
	128	0.4367	0.2099	0.2268		128	0.4046	0.1925	0.2121		128	0.4104	0.1851	0.2252
	129	0.4359	0.2096	0.2262		129	0.4051	0.1932	0.2119		129	0.4116	0.1858	0.2258
	130	0.4349	0.2093	0.2256		130	0.4055	0.1938	0.2117		130	0.4126	0.1864	0.2263
	131	0.4324	0.207	0.2253		131	0.4129	0.1956	0.2173		131	0.4146	0.1894	0.2253
	132	0.4315	0.2063	0.2252		132	0.4138	0.1963	0.2175		132	0.4145	0.188	0.2264
	133	0.4307	0.2056	0.2251		133	0.4152	0.1971	0.2181		133	0.4145	0.1867	0.2278
	134	0.4301	0.205	0.2251		134	0.4173	0.1983	0.219		134	0.4149	0.1856	0.2293
	135	0.4298	0.2046	0.2252		135	0.4202	0.1997	0.2204		135	0.4159	0.1847	0.2311
	136	0.43	0.2045	0.2255		136	0.4238	0.2015	0.2222		136	0.4174	0.1843	0.2332
	137	0.4306	0.2046	0.226		137	0.428	0.2036	0.2244		137	0.4195	0.1841	0.2353
	138	0.4315	0.2049	0.2265		138	0.4326	0.2059	0.2268		138	0.4219	0.1843	0.2376
	139	0.4324	0.2053	0.2271		139	0.4373	0.2081	0.2292		139	0.4244	0.1846	0.2398
	140	0.433	0.2055	0.2275		140	0.4417	0.2101	0.2316		140	0.4266	0.1848	0.2418
	141	0.4311	0.2057	0.2254		141	0.4399	0.2097	0.2302		141	0.4251	0.1829	0.2422
	142	0.4316	0.2064	0.2252		142	0.4392	0.2098	0.2295		142	0.4246	0.1827	0.2418
	143	0.432	0.2071	0.225		143	0.4384	0.2097	0.2287		143	0.424	0.1826	0.2414
	144	0.4326	0.2078	0.2248		144	0.4377	0.2096	0.2281		144	0.4236	0.1826	0.241
	145	0.4333	0.2086	0.2247		145	0.4372	0.2096	0.2275		145	0.4235	0.1828	0.2407
	146	0.4343	0.2095	0.2248		146	0.4369	0.2097	0.2272		146	0.4238	0.1833	0.2405
	147	0.4355	0.2106	0.2249		147	0.437	0.2099	0.2271		147	0.4244	0.1841	0.2404
	148	0.4367	0.2117	0.225		148	0.4371	0.2101	0.227		148	0.4252	0.1849	0.2403
	149	0.4378	0.2127	0.2251		149	0.4373	0.2102	0.2271		149	0.426	0.1857	0.2403
	0	0.8071	0.23	0.5772		0	0.5457	0.2617	0.284		0	0.4964	0.262	0.2344			0
model2	1	0.8389	0.2325	0.6064	model2	1	0.5562	0.2663	0.2899	model 2	1	0.5008	0.2661	0.2348
	2	0.8686	0.2343	0.6343		2	0.5642	0.2692	0.295		2	0.5029	0.2682	0.2347
	3	0.8963	0.2358	0.6604		3	0.5704	0.2711	0.2993		3	0.5037	0.2692	0.2345
	4	0.9218	0.2374	0.6844		4	0.5755	0.2724	0.303		4	0.5038	0.2697	0.2341
	5	0.9447	0.239	0.7058		5	0.5798	0.2736	0.3062		5	0.5038	0.2699	0.2339
	6	0.9648	0.2408	0.724		6	0.5837	0.2748	0.3089		6	0.5039	0.27	0.2339
	7	0.9815	0.2427	0.7388		7	0.5872	0.2761	0.3111		7	0.5042	0.2702	0.234
	8	0.9943	0.2447	0.7497		8	0.5902	0.2774	0.3128		8	0.5045	0.2702	0.2343
	9	1.0028	0.2464	0.7563		9	0.5924	0.2787	0.3137		9	0.5045	0.2699	0.2346
	10	1.0061	0.2476	0.7584		10	0.593	0.2792	0.3137		10	0.5034	0.2688	0.2347
	11	1.6883	0.3931	1.2952		11	12.257	1.5573	10.7001		11	24.5429	1.7504	22.7934
	12	1.7853	0.4068	1.3785		12	13.3215	1.6771	11.6448		12	26.9312	1.9253	25.0065
	13	1.8746	0.4183	1.4563		13	14.2067	1.761	12.4459		13	28.7778	2.0432	26.735
	14	1.9558	0.4282	1.5276		14	14.9521	1.8235	13.1288		14	30.2623	2.1279	28.1347
	15	2.028	0.4368	1.5912		15	15.5813	1.8722	13.7093		15	31.4805	2.1915	29.2893
	16	2.0904	0.4443	1.6461		16	16.1095	1.9122	14.1973		16	32.487	2.2409	30.2462
	17	2.1422	0.4506	1.6916		17	16.5453	1.947	14.5984		17	33.3117	2.2806	31.0312
	18	2.1823	0.4557	1.7266		18	16.891	1.9784	14.9127		18	33.9647	2.3129	31.6519
	19	2.2096	0.4592	1.7504		19	17.1389	2.0065	15.1323		19	34.4278	2.3377	32.0901
	20	2.2221	0.4604	1.7617		20	17.2405	2.0212	15.2193		20	34.5268	2.3435	32.1834
	21	3.0175	0.6962	2.3212		21	30.5856	0.9555	29.6306		21	77.0574	0.9929	76.0664
	22	3.0598	0.7242	2.3356		22	31.5652	1.0052	30.5605		22	80.3138	1.0302	79.285
	23	3.0811	0.7481	2.333		23	32.1325	1.0384	31.0945		23	81.9681	1.0478	80.9216
	24	3.0835	0.7691	2.3144		24	32.413	1.062	31.3514		24	82.8011	1.0584	81.7437
	25	3.068	0.7874	2.2805		25	32.4557	1.0793	31.3767		25	83.0557	1.0652	81.9915
	26	3.0355	0.8033	2.2321		26	32.2721	1.0919	31.1806		26	82.7931	1.0696	81.7247
	27	2.9864	0.8166	2.1698		27	31.8447	1.1003	30.7449		27	81.9512	1.0718	80.8809
	28	2.9209	0.8269	2.094		28	31.1179	1.1044	30.0141		28	80.2845	1.0707	79.2155
	29	2.8381	0.8332	2.0049		29	29.9557	1.1042	28.8521		29	77.0042	1.0617	75.945
	30	2.7357	0.8338	1.9018		30	27.8084	1.1178	26.6906		30	65.8991	1.0035	64.8956
	31	2.5339	1.0512	1.4827		31	14.699	4.1248	10.5742		31	33.8897	3.6401	30.2497
	32	2.4947	1.0938	1.4009		32	14.524	4.1532	10.3708		32	33.4646	3.6413	29.8234
	33	2.444	1.1318	1.3122		33	14.2621	4.1583	10.1039		33	32.8557	3.6264	29.2294
	34	2.3849	1.1662	1.2186		34	13.9234	4.1446	9.7789		34	32.0827	3.5978	28.4851
	35	2.3199	1.1974	1.1225		35	13.5079	4.1125	9.3955		35	31.1372	3.5537	27.5837
	36	2.2508	1.2249	1.0259		36	13.0092	4.0594	8.9499		36	29.9909	3.4892	26.502
	37	2.1785	1.2478	0.9307		37	12.4148	3.9806	8.4343		37	28.5916	3.3951	25.1969
	38	2.1033	1.2644	0.8388		38	11.7036	3.8677	7.8361		38	26.8462	3.2549	23.592
	39	2.024	1.2725	0.7515		39	10.8389	3.7054	7.1338		39	24.5738	3.0352	21.5394
	40	1.9375	1.2681	0.6694		40	9.72	3.4534	6.2666		40	21.2605	2.6554	18.6052
	41	2.1684	1.6021	0.5663		41	10.857	8.6611	2.1959		41	23.6347	19.9207	3.7141
	42	2.2419	1.7044	0.5375		42	11.7424	9.3529	2.3895		42	25.8033	21.6478	4.1555
	43	2.3102	1.8013	0.5089		43	12.4701	9.8998	2.5702		43	27.4728	22.8913	4.5814
	44	2.3747	1.8929	0.4818		44	13.0786	10.3431	2.7355		44	28.8127	23.8319	4.9808
	45	2.4357	1.9786	0.4571		45	13.5901	10.7078	2.8823		45	29.9118	24.57	5.3418
	46	2.4924	2.0568	0.4356		46	14.0178	11.0103	3.0075		46	30.8199	25.1658	5.6541
	47	2.5431	2.1254	0.4177		47	14.3685	11.2599	3.1086		47	31.5641	25.6542	5.91
	48	2.5855	2.1818	0.4037		48	14.6424	11.4593	3.1831		48	32.1532	26.0504	6.1028
	49	2.6163	2.2228	0.3935		49	14.8293	11.6016	3.2277		49	32.5697	26.3459	6.2238
	50	2.6306	2.2441	0.3866		50	14.8791	11.6436	3.2355		50	32.6611	26.4135	6.2475
	51	3.0555	2.5043	0.5512		51	29.7914	23.7291	6.0623		51	76.4628	63.2103	13.2525
	52	3.1452	2.5809	0.5643		52	30.9263	24.5056	6.4206		52	79.8181	64.9582	14.8598
	53	3.2161	2.6404	0.5757		53	31.6339	24.9542	6.6797		53	81.5394	65.6442	15.8951
	54	3.2691	2.6837	0.5854		54	32.0487	25.1973	6.8514		54	82.4272	65.9285	16.4986
	55	3.3041	2.7108	0.5933		55	32.2251	25.2853	6.9398		55	82.7332	66.0086	16.7245
	56	3.3207	2.7213	0.5994		56	32.1804	25.2351	6.9454		56	82.5236	65.9376	16.586
	57	3.3177	2.7144	0.6034		57	31.9027	25.0372	6.8655		57	81.7417	65.6805	16.0612
	58	3.2937	2.6887	0.605		58	31.3438	24.65	6.6938		58	80.1505	65.0637	15.0869
	59	3.2458	2.642	0.6038		59	30.3799	23.9635	6.4165		59	76.984	63.4711	13.5129
	60	3.1689	2.5698	0.5992		60	28.5012	22.5111	5.9901		60	66.0747	55.6925	10.3822
	61	2.2872	1.6152	0.672		61	17.0589	11.1903	5.8686		61	35.6615	28.8918	6.7696
	62	2.2571	1.5936	0.6635		62	16.8312	11.0511	5.78		62	35.1789	28.5564	6.6225
	63	2.2135	1.562	0.6514		63	16.5059	10.8655	5.6404		63	34.5005	28.1111	6.3895
	64	2.1576	1.5216	0.636		64	16.0914	10.6364	5.455		64	33.645	27.5634	6.0816
	65	2.0907	1.473	0.6177		65	15.5856	10.3584	5.2272		65	32.6014	26.8928	5.7086
	66	2.0137	1.417	0.5968		66	14.9798	10.02	4.9598		66	31.3381	26.0555	5.2826
	67	1.9275	1.3539	0.5736		67	14.2587	9.6033	4.6555		67	29.7983	24.9805	4.8178
	68	1.8329	1.2844	0.5485		68	13.3987	9.082	4.3167		68	27.8834	23.5546	4.3288
	69	1.7305	1.2087	0.5218		69	12.359	8.4135	3.9455		69	25.4125	21.5847	3.8278
	70	1.6207	1.1267	0.494		70	11.0236	7.4839	3.5397		70	21.9159	18.5973	3.3185
	71	0.9479	0.6042	0.3436		71	0.7026	0.4198	0.2828		71	0.3563	0.2064	0.1499
	72	0.9404	0.5975	0.3429		72	0.6985	0.4178	0.2807		72	0.3566	0.2064	0.1502
	73	0.929	0.588	0.341		73	0.6925	0.4146	0.2778		73	0.3575	0.2066	0.1509
	74	0.9142	0.5761	0.3381		74	0.6849	0.4104	0.2745		74	0.3594	0.2072	0.1521
	75	0.8963	0.562	0.3343		75	0.6759	0.4052	0.2707		75	0.3621	0.2083	0.1538
	76	0.8757	0.5459	0.3298		76	0.6656	0.399	0.2666		76	0.3656	0.2096	0.156
	77	0.8527	0.5282	0.3245		77	0.6539	0.3915	0.2623		77	0.3697	0.2111	0.1586
	78	0.8276	0.509	0.3186		78	0.6404	0.3826	0.2578		78	0.3739	0.2124	0.1615
	79	0.8005	0.4884	0.3122		79	0.6248	0.3718	0.253		79	0.3777	0.2133	0.1643
	80	0.7715	0.4664	0.3052		80	0.6066	0.3585	0.2481		80	0.3802	0.2132	0.167
	81	0.7249	0.4227	0.3022		81	0.399	0.2326	0.1664		81	0.3228	0.1833	0.1395
	82	0.7237	0.4215	0.3022		82	0.3962	0.2314	0.1648		82	0.3223	0.1822	0.1401
	83	0.7203	0.4188	0.3016		83	0.3936	0.2301	0.1636		83	0.3226	0.1813	0.1413
	84	0.7149	0.4147	0.3003		84	0.3915	0.2287	0.1628		84	0.3239	0.1809	0.1431
	85	0.7079	0.4094	0.2985		85	0.39	0.2274	0.1626		85	0.3264	0.181	0.1454
	86	0.6993	0.4031	0.2961		86	0.3892	0.2262	0.163		86	0.33	0.1816	0.1484
	87	0.6893	0.396	0.2934		87	0.389	0.225	0.164		87	0.3345	0.1827	0.1518
	88	0.6781	0.388	0.2901		88	0.3892	0.2239	0.1653		88	0.3398	0.1841	0.1556
	89	0.6657	0.3793	0.2865		89	0.3897	0.2226	0.1671		89	0.3455	0.1858	0.1596
	90	0.652	0.3697	0.2823		90	0.3899	0.221	0.169		90	0.3512	0.1876	0.1636
	91	0.6424	0.3638	0.2786		91	0.3632	0.2069	0.1563		91	0.3501	0.1876	0.1626
	92	0.641	0.3623	0.2787		92	0.3623	0.2064	0.1559		92	0.3493	0.1867	0.1627
	93	0.6382	0.36	0.2783		93	0.3619	0.2059	0.156		93	0.3491	0.1859	0.1632
	94	0.6344	0.357	0.2774		94	0.3622	0.2056	0.1567		94	0.3495	0.1853	0.1642
	95	0.6297	0.3536	0.2762		95	0.3634	0.2055	0.158		95	0.3509	0.1851	0.1657
	96	0.6243	0.3497	0.2746		96	0.3655	0.2056	0.1599		96	0.3531	0.1853	0.1678
	97	0.6183	0.3456	0.2727		97	0.3682	0.2058	0.1624		97	0.3562	0.1858	0.1704
	98	0.6115	0.341	0.2705		98	0.3715	0.2062	0.1653		98	0.36	0.1866	0.1734
	99	0.6039	0.336	0.2679		99	0.375	0.2064	0.1686		99	0.3641	0.1875	0.1766
	100	0.5953	0.3304	0.2648		100	0.3784	0.2064	0.172		100	0.3682	0.1885	0.1798
	101	0.5642	0.3154	0.2488		101	0.3721	0.2019	0.1702		101	0.3704	0.1902	0.1802
	102	0.5593	0.3135	0.2459		102	0.3723	0.2024	0.17		102	0.371	0.1911	0.1799
	103	0.5535	0.3109	0.2426		103	0.3732	0.2031	0.1701		103	0.3721	0.192	0.18
	104	0.5472	0.3079	0.2393		104	0.3749	0.2042	0.1707		104	0.3738	0.1933	0.1805
	105	0.5405	0.3046	0.2359		105	0.3774	0.2056	0.1718		105	0.3763	0.1947	0.1816
	106	0.5337	0.301	0.2326		106	0.3808	0.2075	0.1734		106	0.3795	0.1965	0.1831
	107	0.5269	0.2974	0.2296		107	0.385	0.2096	0.1754		107	0.3834	0.1984	0.185
	108	0.5202	0.2935	0.2267		108	0.3896	0.2119	0.1777		108	0.3876	0.2003	0.1873
	109	0.5134	0.2894	0.224		109	0.3944	0.2143	0.1801		109	0.3919	0.2021	0.1898
	110	0.5063	0.285	0.2213		110	0.3991	0.2165	0.1826		110	0.3959	0.2036	0.1923
	111	0.4923	0.2744	0.2179		111	0.4044	0.2208	0.1836		111	0.3846	0.1948	0.1898
	112	0.4907	0.2723	0.2184		112	0.4044	0.221	0.1834		112	0.3849	0.1954	0.1895
	113	0.4885	0.2696	0.2189		113	0.4044	0.2211	0.1833		113	0.3856	0.1961	0.1895
	114	0.486	0.2666	0.2194		114	0.4046	0.2212	0.1834		114	0.3869	0.1971	0.1898
	115	0.4834	0.2634	0.22		115	0.405	0.2213	0.1837		115	0.3888	0.1984	0.1904
	116	0.4808	0.2601	0.2207		116	0.4058	0.2215	0.1842		116	0.3914	0.2	0.1915
	117	0.4782	0.2568	0.2214		117	0.4068	0.2218	0.185		117	0.3946	0.2018	0.1928
	118	0.4755	0.2534	0.2221		118	0.4079	0.2221	0.1859		118	0.3981	0.2037	0.1943
	119	0.4726	0.2498	0.2227		119	0.409	0.2222	0.1868		119	0.4016	0.2057	0.1959
	120	0.4692	0.2461	0.2231		120	0.4097	0.2221	0.1877		120	0.4048	0.2073	0.1975
	121	0.4659	0.243	0.2229		121	0.4066	0.2205	0.1862		121	0.4007	0.2034	0.1973
	122	0.463	0.242	0.221		122	0.4059	0.2193	0.1866		122	0.4016	0.2031	0.1985
	123	0.4598	0.2408	0.219		123	0.4055	0.2181	0.1874		123	0.4028	0.2029	0.1999
	124	0.4564	0.2395	0.217		124	0.4056	0.217	0.1887		124	0.4045	0.203	0.2015
	125	0.4532	0.2381	0.2151		125	0.4064	0.2161	0.1904		125	0.4068	0.2034	0.2034
	126	0.4502	0.2368	0.2134		126	0.4079	0.2154	0.1925		126	0.4097	0.2043	0.2055
	127	0.4474	0.2355	0.2119		127	0.41	0.215	0.195		127	0.4131	0.2054	0.2077
	128	0.4448	0.2341	0.2107		128	0.4125	0.2147	0.1978		128	0.4168	0.2069	0.2099
	129	0.4422	0.2326	0.2095		129	0.4151	0.2145	0.2006		129	0.4206	0.2085	0.2121
	130	0.4393	0.2309	0.2084		130	0.4175	0.2142	0.2033		130	0.4241	0.2102	0.214
	131	0.4387	0.2288	0.2099		131	0.4093	0.2081	0.2012		131	0.4251	0.2122	0.2129
	132	0.4389	0.2273	0.2116		132	0.4072	0.2071	0.2001		132	0.4247	0.2123	0.2124
	133	0.4392	0.2258	0.2134		133	0.4052	0.206	0.1992		133	0.4247	0.2127	0.212
	134	0.4397	0.2244	0.2153		134	0.4037	0.2052	0.1986		134	0.4251	0.2134	0.2117
	135	0.4406	0.2233	0.2173		135	0.4029	0.2046	0.1983		135	0.4261	0.2143	0.2117
	136	0.4419	0.2226	0.2193		136	0.4029	0.2044	0.1985		136	0.4276	0.2156	0.212
	137	0.4435	0.2222	0.2213		137	0.4035	0.2045	0.199		137	0.4296	0.2171	0.2125
	138	0.4453	0.222	0.2232		138	0.4048	0.2049	0.1999		138	0.432	0.2187	0.2132
	139	0.4469	0.222	0.2249		139	0.4065	0.2055	0.201		139	0.4343	0.2203	0.214
	140	0.4482	0.222	0.2262		140	0.4083	0.2061	0.2022		140	0.4363	0.2216	0.2147
	141	0.4496	0.219	0.2306		141	0.4088	0.2079	0.2009		141	0.4348	0.2178	0.217
	142	0.4496	0.2194	0.2302		142	0.4083	0.2076	0.2007		142	0.4322	0.2157	0.2165
	143	0.4495	0.2198	0.2297		143	0.4081	0.2075	0.2006		143	0.4297	0.2136	0.2161
	144	0.4496	0.2203	0.2293		144	0.4084	0.2076	0.2008		144	0.4274	0.2117	0.2157
	145	0.4498	0.2209	0.2289		145	0.4093	0.208	0.2014		145	0.4256	0.21	0.2156
	146	0.4503	0.2216	0.2287		146	0.4109	0.2087	0.2022		146	0.4243	0.2086	0.2157
	147	0.4509	0.2224	0.2286		147	0.4131	0.2098	0.2033		147	0.4235	0.2075	0.216
	148	0.4517	0.2232	0.2286		148	0.4157	0.211	0.2046		148	0.4231	0.2067	0.2164
	149	0.4523	0.2238	0.2285		149	0.4184	0.2123	0.206		149	0.423	0.2062	0.2168
	0	0.6185	0.2474	0.3711		0	0.618	0.2255	0.3925		0	0.6819	0.2331	0.4488			0
model 3	1	0.6393	0.2514	0.3879	model 3	1	0.6748	0.2777	0.3971	model 3	1	0.4662	0.179	0.2872
	2	0.6588	0.2547	0.4041		2	0.6916	0.2827	0.4089		2	0.4657	0.1776	0.288
	3	0.6774	0.2576	0.4198		3	0.7063	0.2865	0.4198		3	0.4645	0.1758	0.2887
	4	0.6949	0.2603	0.4346		4	0.7192	0.2894	0.4298		4	0.4632	0.1738	0.2894
	5	0.7113	0.2628	0.4485		5	0.7305	0.2918	0.4387		5	0.462	0.172	0.2901
	6	0.7264	0.2653	0.4611		6	0.7402	0.2939	0.4463		6	0.4611	0.1704	0.2908
	7	0.7397	0.2676	0.4721		7	0.7483	0.2958	0.4525		7	0.4606	0.1691	0.2914
	8	0.751	0.2698	0.4813		8	0.7545	0.2975	0.457		8	0.4603	0.1683	0.292
	9	0.7597	0.2716	0.4881		9	0.7582	0.2987	0.4596		9	0.4601	0.1677	0.2924
	10	0.7652	0.2728	0.4924		10	0.7585	0.2987	0.4597		10	0.4595	0.1672	0.2923
	11	1.5944	0.4736	1.1209		11	6.2288	1.2712	4.9577		11	18.0094	1.7692	16.2405
	12	1.674	0.4886	1.1853		12	6.6827	1.3556	5.3273		12	19.6928	1.9276	17.7655
	13	1.7465	0.5011	1.2454		13	7.0747	1.4211	5.6537		13	21.0394	2.0412	18.9986
	14	1.8117	0.5114	1.3003		14	7.4129	1.4734	5.9395		14	22.1441	2.1277	20.0167
	15	1.8693	0.52	1.3492		15	7.7022	1.5159	6.1864		15	23.0618	2.1957	20.8663
	16	1.9185	0.5273	1.3912		16	7.9456	1.5506	6.395		16	23.8258	2.2505	21.5754
	17	1.9589	0.5334	1.4255		17	8.1438	1.5791	6.5648		17	24.4549	2.2955	22.1595
	18	1.9894	0.5381	1.4513		18	8.2959	1.6019	6.694		18	24.9557	2.3327	22.623
	19	2.0091	0.5415	1.4677		19	8.3969	1.6186	6.7783		19	25.3172	2.3626	22.9547
	20	2.016	0.5425	1.4736		20	8.4324	1.6247	6.8078		20	25.4537	2.3726	23.0812
	21	3.4429	0.6959	2.747		21	19.5246	0.9823	18.5425		21	54.7535	0.7774	53.9769
	22	3.5403	0.7195	2.8208		22	20.1341	1.021	19.1134		22	56.8485	0.8069	56.0421
	23	3.6132	0.7383	2.8749		23	20.527	1.0463	19.4811		23	57.9968	0.8221	57.1749
	24	3.6633	0.7536	2.9097		24	20.7536	1.0647	19.6893		24	58.5951	0.8316	57.7638
	25	3.6915	0.7659	2.9257		25	20.8365	1.0788	19.7579		25	58.7817	0.8378	57.9443
	26	3.6981	0.7754	2.9227		26	20.7835	1.09	19.6937		26	58.5939	0.842	57.7523
	27	3.6829	0.7821	2.9008		27	20.591	1.0988	19.4923		27	57.9973	0.8447	57.1532
	28	3.6451	0.7855	2.8596		28	20.2417	1.1051	19.1368		28	56.8597	0.8458	56.0145
	29	3.5831	0.7846	2.7985		29	19.6942	1.1065	18.5878		29	54.8059	0.8443	53.9623
	30	3.4926	0.7766	2.716		30	18.8202	1.0888	17.7314		30	49.9391	0.8182	49.1209
	31	3.643	0.8053	2.8378		31	15.1371	2.7986	12.3386		31	26.9719	3.3847	23.5872
	32	3.6839	0.8203	2.8635		32	15.082	2.8053	12.2767		32	26.7196	3.3769	23.3427
	33	3.7006	0.8313	2.8694		33	14.9285	2.7969	12.1316		33	26.3175	3.3566	22.9609
	34	3.6956	0.8391	2.8566		34	14.6911	2.7773	11.9139		34	25.7834	3.3254	22.458
	35	3.6702	0.8441	2.8261		35	14.3732	2.747	11.6264		35	25.1136	3.2816	21.8321
	36	3.6251	0.8464	2.7787		36	13.9719	2.7044	11.2677		36	24.29	3.2214	21.0687
	37	3.5605	0.8456	2.7149		37	13.4784	2.6466	10.8321		37	23.2767	3.1381	20.1387
	38	3.4761	0.841	2.635		38	12.8774	2.5684	10.3092		38	22.0082	3.0198	18.9885
	39	3.3705	0.8313	2.5392		39	12.1401	2.4597	9.6805		39	20.3549	2.8402	17.5148
	40	3.2406	0.8137	2.4269		40	11.1902	2.2877	8.9025		40	17.9437	2.495	15.4487
	41	3.565	0.7849	2.7801		41	11.9919	2.3941	9.5979		41	21.2437	2.8411	18.4028
	42	3.6845	0.7959	2.8887		42	12.7159	2.507	10.209		42	22.9295	3.0333	19.8964
	43	3.7809	0.8018	2.9792		43	13.309	2.5893	10.7199		43	24.2218	3.1595	21.0625
	44	3.8556	0.8041	3.0515		44	13.7983	2.6508	11.1476		44	25.2529	3.2474	22.0057
	45	3.9089	0.8034	3.1055		45	14.1983	2.6969	11.5016		45	26.0902	3.3102	22.7802
	46	3.9407	0.8002	3.1406		46	14.5171	2.7304	11.7868		46	26.7709	3.355	23.416
	47	3.9504	0.7945	3.1559		47	14.7572	2.7528	12.0045		47	27.3144	3.3862	23.9283
	48	3.9364	0.7859	3.1505		48	14.9151	2.7639	12.1513		48	27.7253	3.4057	24.3197
	49	3.8963	0.7736	3.1227		49	14.9765	2.76	12.2165		49	27.9874	3.4125	24.5749
	50	3.8253	0.7555	3.0698		50	14.8876	2.7207	12.1669		50	27.9848	3.3841	24.6007
	51	3.8319	0.8324	2.9994		51	19.4754	1.0542	18.4214		51	55.1774	0.8199	54.3582
	52	3.8835	0.8314	3.0521		52	20.0199	1.0517	18.9685		52	57.1325	0.8193	56.3137
	53	3.909	0.8257	3.0833		53	20.3656	1.0451	19.3207		53	58.2086	0.8174	57.3916
	54	3.9103	0.8166	3.0938		54	20.5539	1.0364	19.5178		54	58.7616	0.8141	57.9478
	55	3.8885	0.8045	3.0841		55	20.6025	1.0256	19.5771		55	58.9167	0.8091	58.1078
	56	3.8439	0.7894	3.0545		56	20.5153	1.0122	19.5034		56	58.705	0.8018	57.9035
	57	3.7762	0.7713	3.005		57	20.2849	0.9947	19.2905		57	58.0884	0.791	57.2977
	58	3.6847	0.7493	2.9354		58	19.8891	0.9706	18.9188		58	56.9293	0.7739	56.1558
	59	3.5675	0.7223	2.8452		59	19.2783	0.9331	18.3454		59	54.8355	0.7413	54.0948
	60	3.4207	0.6874	2.7333		60	18.3034	0.8501	17.4532		60	49.7102	0.5954	49.1148
	61	1.9489	0.5192	1.4298		61	8.1657	1.6013	6.5644		61	24.578	2.3294	22.2486
	62	1.9341	0.5167	1.4175		62	8.0582	1.5843	6.4739		62	24.2456	2.3066	21.9391
	63	1.9084	0.5124	1.396		63	7.9018	1.5612	6.3407		63	23.774	2.2753	21.4987
	64	1.8728	0.5066	1.3663		64	7.7012	1.5325	6.1687		64	23.1746	2.2357	20.9389
	65	1.8283	0.4995	1.3289		65	7.4572	1.4977	5.9596		65	22.4414	2.1858	20.2558
	66	1.7754	0.4909	1.2845		66	7.1689	1.4553	5.7137		66	21.5563	2.1221	19.4344
	67	1.7147	0.4808	1.2339		67	6.8336	1.4031	5.4306		67	20.4867	2.0392	18.4478
	68	1.6463	0.4687	1.1776		68	6.4465	1.3377	5.1089		68	19.1788	1.9279	17.2511
	69	1.5704	0.454	1.1164		69	5.9996	1.253	4.7467		69	17.5411	1.7699	15.7713
	70	1.4865	0.4357	1.0509		70	5.4731	1.1343	4.3389		70	15.3695	1.4998	13.8698
	71	0.7524	0.2884	0.464		71	0.6957	0.277	0.4188		71	0.5599	0.2086	0.3513
	72	0.7493	0.289	0.4603		72	0.6959	0.2784	0.4175		72	0.5614	0.2093	0.3521
	73	0.7439	0.2891	0.4548		73	0.6938	0.2795	0.4144		73	0.5619	0.2096	0.3523
	74	0.7366	0.2887	0.4479		74	0.6899	0.2803	0.4097		74	0.5618	0.2099	0.3519
	75	0.7276	0.288	0.4396		75	0.6844	0.2808	0.4036		75	0.5613	0.2102	0.3511
	76	0.7172	0.2869	0.4302		76	0.6773	0.281	0.3963		76	0.5603	0.2105	0.3498
	77	0.7054	0.2854	0.4199		77	0.6685	0.2806	0.3879		77	0.5587	0.2107	0.3481
	78	0.6921	0.2834	0.4088		78	0.6578	0.2792	0.3786		78	0.5563	0.2104	0.3459
	79	0.6773	0.2804	0.3969		79	0.6447	0.2764	0.3682		79	0.5525	0.2093	0.3431
	80	0.6604	0.2762	0.3843		80	0.6284	0.2714	0.357		80	0.5466	0.2068	0.3398
	81	0.5314	0.2179	0.3135		81	0.4449	0.1958	0.2491		81	0.4139	0.1515	0.2624
	82	0.5295	0.218	0.3115		82	0.4444	0.1958	0.2486		82	0.4123	0.1521	0.2602
	83	0.527	0.2182	0.3088		83	0.4438	0.1959	0.248		83	0.4106	0.1529	0.2577
	84	0.5241	0.2186	0.3056		84	0.4435	0.1962	0.2474		84	0.409	0.1539	0.2551
	85	0.521	0.2191	0.3019		85	0.4436	0.1967	0.2469		85	0.4077	0.1552	0.2526
	86	0.5178	0.2198	0.298		86	0.444	0.1976	0.2464		86	0.4068	0.1567	0.2501
	87	0.5144	0.2206	0.2938		87	0.4447	0.1987	0.2461		87	0.4061	0.1584	0.2477
	88	0.5108	0.2214	0.2894		88	0.4454	0.1998	0.2456		88	0.4055	0.16	0.2455
	89	0.5068	0.222	0.2848		89	0.4458	0.2008	0.245		89	0.4046	0.1612	0.2434
	90	0.5022	0.2223	0.2798		90	0.4452	0.2011	0.244		90	0.4031	0.1617	0.2414
	91	0.4811	0.2092	0.2719		91	0.4102	0.1866	0.2235		91	0.3621	0.1422	0.2199
	92	0.4792	0.2084	0.2708		92	0.4098	0.186	0.2237		92	0.3619	0.1417	0.2202
	93	0.4767	0.2075	0.2692		93	0.4096	0.1855	0.2241		93	0.3622	0.1415	0.2207
	94	0.474	0.2068	0.2672		94	0.4099	0.1852	0.2246		94	0.363	0.1416	0.2214
	95	0.4712	0.2063	0.2648		95	0.4107	0.1852	0.2255		95	0.3647	0.1422	0.2225
	96	0.4684	0.206	0.2623		96	0.4122	0.1855	0.2267		96	0.367	0.1432	0.2238
	97	0.4655	0.206	0.2596		97	0.4141	0.1861	0.2281		97	0.37	0.1447	0.2254
	98	0.4626	0.206	0.2566		98	0.4164	0.1868	0.2296		98	0.3735	0.1464	0.2271
	99	0.4595	0.2061	0.2534		99	0.4187	0.1876	0.2311		99	0.3772	0.1484	0.2289
	100	0.4558	0.206	0.2498		100	0.4206	0.1882	0.2324		100	0.3809	0.1503	0.2306
	101	0.454	0.2051	0.2488		101	0.4059	0.1822	0.2237		101	0.3721	0.1468	0.2253
	102	0.4531	0.2043	0.2488		102	0.4028	0.1811	0.2216		102	0.3722	0.147	0.2251
	103	0.4522	0.2037	0.2485		103	0.3998	0.1802	0.2196		103	0.3727	0.1474	0.2253
	104	0.4515	0.2034	0.2481		104	0.3973	0.1796	0.2177		104	0.3739	0.148	0.2258
	105	0.4511	0.2035	0.2476		105	0.3955	0.1793	0.2161		105	0.3757	0.1489	0.2268
	106	0.4511	0.204	0.247		106	0.3944	0.1795	0.2149		106	0.3783	0.1501	0.2282
	107	0.4514	0.205	0.2464		107	0.3941	0.18	0.2141		107	0.3814	0.1515	0.2299
	108	0.452	0.2064	0.2457		108	0.3944	0.1808	0.2135		108	0.3849	0.153	0.2319
	109	0.4527	0.2079	0.2448		109	0.3951	0.1819	0.2132		109	0.3884	0.1544	0.234
	110	0.4529	0.2094	0.2435		110	0.3959	0.1829	0.2129		110	0.3918	0.1558	0.236
	111	0.4437	0.203	0.2408		111	0.3904	0.1818	0.2086		111	0.395	0.1566	0.2383
	112	0.4445	0.203	0.2414		112	0.3895	0.1815	0.208		112	0.3963	0.1567	0.2395
	113	0.4452	0.2032	0.242		113	0.3887	0.1813	0.2074		113	0.3979	0.157	0.2409
	114	0.446	0.2035	0.2425		114	0.3883	0.1813	0.207		114	0.4001	0.1574	0.2427
	115	0.4472	0.204	0.2431		115	0.3883	0.1815	0.2068		115	0.403	0.1582	0.2448
	116	0.4486	0.2048	0.2437		116	0.3887	0.1819	0.2068		116	0.4064	0.1593	0.2472
	117	0.4502	0.2058	0.2444		117	0.3897	0.1826	0.2071		117	0.4104	0.1606	0.2498
	118	0.4518	0.2068	0.245		118	0.3909	0.1834	0.2075		118	0.4148	0.1622	0.2526
	119	0.4532	0.2079	0.2454		119	0.3922	0.1843	0.2079		119	0.4192	0.1638	0.2554
	120	0.454	0.2086	0.2454		120	0.3933	0.185	0.2083		120	0.4233	0.1654	0.2579
	121	0.4508	0.2066	0.2442		121	0.3952	0.1845	0.2107		121	0.4292	0.1687	0.2605
	122	0.4496	0.2062	0.2434		122	0.3954	0.1835	0.2118		122	0.4292	0.1693	0.2598
	123	0.448	0.2059	0.2422		123	0.3958	0.1828	0.213		123	0.4292	0.17	0.2592
	124	0.4464	0.2057	0.2407		124	0.3967	0.1824	0.2143		124	0.4295	0.1707	0.2588
	125	0.4449	0.2057	0.2392		125	0.3981	0.1824	0.2157		125	0.4301	0.1715	0.2586
	126	0.4436	0.206	0.2376		126	0.4001	0.1828	0.2173		126	0.4311	0.1725	0.2586
	127	0.4425	0.2065	0.236		127	0.4025	0.1836	0.2189		127	0.4324	0.1737	0.2588
	128	0.4416	0.2072	0.2343		128	0.4053	0.1847	0.2206		128	0.4339	0.1748	0.2591
	129	0.4405	0.208	0.2325		129	0.408	0.1858	0.2222		129	0.4354	0.176	0.2594
	130	0.4391	0.2086	0.2305		130	0.4104	0.187	0.2234		130	0.4365	0.1769	0.2596
	131	0.44	0.2108	0.2293		131	0.4091	0.187	0.2221		131	0.4369	0.1758	0.2611
	132	0.4405	0.2108	0.2296		132	0.4087	0.1874	0.2213		132	0.4357	0.1752	0.2605
	133	0.4409	0.2111	0.2298		133	0.4087	0.1881	0.2206		133	0.4346	0.1746	0.26
	134	0.4415	0.2116	0.23		134	0.4093	0.1892	0.2201		134	0.4337	0.1741	0.2596
	135	0.4425	0.2124	0.2301		135	0.4107	0.1908	0.2199		135	0.4331	0.1738	0.2594
	136	0.4437	0.2135	0.2302		136	0.4127	0.1927	0.22		136	0.4331	0.1736	0.2594
	137	0.4451	0.2148	0.2303		137	0.4154	0.1951	0.2204		137	0.4334	0.1737	0.2597
	138	0.4465	0.2163	0.2302		138	0.4185	0.1976	0.2209		138	0.434	0.1739	0.2601
	139	0.4478	0.2178	0.23		139	0.4217	0.2001	0.2216		139	0.4347	0.1741	0.2607
	140	0.4484	0.219	0.2294		140	0.4246	0.2025	0.2222		140	0.4352	0.1741	0.2611
	141	0.4458	0.2181	0.2277		141	0.4217	0.2005	0.2212		141	0.4314	0.1755	0.2559
	142	0.4452	0.218	0.2272		142	0.4213	0.1997	0.2216		142	0.4297	0.1757	0.2541
	143	0.4447	0.2181	0.2267		143	0.4209	0.1987	0.2222		143	0.4282	0.1759	0.2523
	144	0.4445	0.2183	0.2262		144	0.4207	0.1978	0.2229		144	0.4269	0.1762	0.2507
	145	0.4448	0.2189	0.2259		145	0.4208	0.197	0.2238		145	0.426	0.1767	0.2494
	146	0.4454	0.2196	0.2258		146	0.4214	0.1963	0.225		146	0.4256	0.1773	0.2483
	147	0.4465	0.2206	0.2258		147	0.4222	0.1958	0.2264		147	0.4256	0.178	0.2476
	148	0.4478	0.2218	0.226		148	0.4232	0.1954	0.2278		148	0.4259	0.1788	0.2471
	149	0.4491	0.2229	0.2261		149	0.4242	0.195	0.2292		149	0.4262	0.1794	0.2468
	0	0.5173	0.3107	0.2067		0	0.5624	0.3428	0.2195		0	0.3914	0.2086	0.1828			0
model 4	1	0.5251	0.3193	0.2057	model4	1	0.5734	0.3543	0.2192	model 4	1	0.3908	0.2088	0.182
	2	0.5319	0.3272	0.2046		2	0.5824	0.3638	0.2186		2	0.3897	0.2085	0.1812
	3	0.538	0.3344	0.2035		3	0.5901	0.372	0.2181		3	0.3885	0.2081	0.1804
	4	0.5435	0.3411	0.2025		4	0.5969	0.3793	0.2176		4	0.3876	0.2078	0.1799
	5	0.5487	0.3471	0.2016		5	0.603	0.3857	0.2173		5	0.3873	0.2077	0.1796
	6	0.5534	0.3524	0.201		6	0.6084	0.3913	0.2171		6	0.3876	0.208	0.1796
	7	0.5576	0.357	0.2006		7	0.6132	0.3961	0.2171		7	0.3885	0.2086	0.1798
	8	0.561	0.3607	0.2003		8	0.6172	0.4001	0.2172		8	0.3898	0.2095	0.1802
	9	0.5634	0.3632	0.2001		9	0.6201	0.4029	0.2172		9	0.3912	0.2105	0.1807
	10	0.5643	0.3643	0.1999		10	0.6213	0.4043	0.217		10	0.392	0.2111	0.1808
	11	1.0079	0.7226	0.2853		11	3.3592	2.6462	0.7129		11	9.1408	7.5372	1.6036
	12	1.0496	0.758	0.2916		12	3.5908	2.8394	0.7515		12	9.9153	8.201	1.7144
	13	1.0872	0.7895	0.2977		13	3.7933	3.0055	0.7878		13	10.5603	8.741	1.8193
	14	1.1211	0.8176	0.3035		14	3.9713	3.1498	0.8215		14	11.1117	9.1948	1.917
	15	1.1513	0.8421	0.3091		15	4.1267	3.2748	0.8518		15	11.5858	9.58	2.0059
	16	1.1774	0.8631	0.3143		16	4.2602	3.3819	0.8782		16	11.9909	9.9065	2.0844
	17	1.1991	0.8802	0.319		17	4.3714	3.4714	0.9		17	12.3304	10.1797	2.1508
	18	1.2159	0.893	0.3229		18	4.459	3.5425	0.9165		18	12.6035	10.4006	2.2029
	19	1.2268	0.9009	0.3259		19	4.5198	3.5928	0.9269		19	12.8015	10.5633	2.2382
	20	1.2303	0.9025	0.3278		20	4.5444	3.6141	0.9303		20	12.8822	10.63	2.2522
	21	2.0258	1.5554	0.4703		21	9.6527	7.928	1.7247		21	26.9597	23.317	3.6427
	22	2.0826	1.6055	0.477		22	9.9122	8.159	1.7532		22	27.833	24.1017	3.7313
	23	2.1268	1.6447	0.4821		23	10.0746	8.3042	1.7704		23	28.3266	24.536	3.7906
	24	2.1595	1.674	0.4855		24	10.1629	8.3865	1.7764		24	28.5839	24.7616	3.8223
	25	2.1812	1.6939	0.4872		25	10.1866	8.4154	1.7712		25	28.6542	24.827	3.8271
	26	2.192	1.7047	0.4873		26	10.1487	8.3939	1.7549		26	28.5509	24.7453	3.8055
	27	2.1917	1.706	0.4857		27	10.0473	8.3195	1.7278		27	28.2615	24.5041	3.7573
	28	2.1796	1.6973	0.4823		28	9.8741	8.1838	1.6902		28	27.7382	24.0561	3.6821
	29	2.1542	1.677	0.4772		29	9.6082	7.9657	1.6425		29	26.8432	23.2649	3.5784
	30	2.1124	1.6421	0.4703		30	9.1828	7.598	1.5848		30	24.7295	21.2865	3.443
	31	2.2824	1.7798	0.5026		31	7.402	6.1619	1.24		31	13.5684	11.4052	2.1632
	32	2.3149	1.8083	0.5066		32	7.3768	6.1491	1.2276		32	13.4247	11.2847	2.1401
	33	2.3335	1.8247	0.5089		33	7.3027	6.0956	1.2071		33	13.1987	11.098	2.1007
	34	2.3395	1.8301	0.5094		34	7.1881	6.0088	1.1793		34	12.9025	10.8551	2.0474
	35	2.3335	1.8253	0.5083		35	7.0361	5.8909	1.1452		35	12.5385	10.5565	1.982
	36	2.3159	1.8105	0.5054		36	6.8467	5.7412	1.1055		36	12.1028	10.1971	1.9058
	37	2.2867	1.7858	0.5009		37	6.6176	5.5565	1.0611		37	11.5858	9.7656	1.8201
	38	2.2453	1.7505	0.4948		38	6.3431	5.3304	1.0127		38	10.967	9.2406	1.7264
	39	2.1906	1.7035	0.4871		39	6.0107	5.0495	0.9612		39	10.1991	8.5733	1.6258
	40	2.1199	1.6421	0.4778		40	5.5812	4.6741	0.9071		40	9.0847	7.5652	1.5194
	41	3.5115	2.6652	0.8463		41	14.5777	11.5288	3.0489		41	28.5268	23.5299	4.9969
	42	3.6795	2.7902	0.8893		42	15.7162	12.3549	3.3613		42	31.2556	25.568	5.6876
	43	3.8241	2.8951	0.929		43	16.6375	12.9849	3.6526		43	33.3051	26.9588	6.3462
	44	3.946	2.9814	0.9646		44	17.395	13.4758	3.9192		44	34.9218	27.9668	6.9551
	45	4.0454	3.0497	0.9957		45	18.0199	13.8628	4.1571		45	36.23	28.7333	7.4968
	46	4.1217	3.1002	1.0215		46	18.5312	14.1687	4.3625		46	37.2982	29.3379	7.9603
	47	4.1741	3.1326	1.0415		47	18.9392	14.4074	4.5318		47	38.1637	29.8243	8.3394
	48	4.201	3.1458	1.0552		48	19.2457	14.5842	4.6615		48	38.8403	30.2117	8.6286
	49	4.1997	3.1377	1.062		49	19.4397	14.6928	4.7469		49	39.309	30.4907	8.8183
	50	4.1651	3.1035	1.0616		50	19.4643	14.6859	4.7784		50	39.3731	30.5065	8.8666
	51	5.4985	3.9433	1.5551		51	34.612	26.4216	8.1904		51	86.4501	66.9275	19.5227
	52	5.6172	4.0247	1.5926		52	35.7781	27.1653	8.6128		52	90.0227	68.2405	21.7821
	53	5.6959	4.0761	1.6198		53	36.4649	27.5741	8.8908		53	91.7802	68.6383	23.1418
	54	5.7372	4.1006	1.6366		54	36.8329	27.7854	9.0475		54	92.6454	68.7641	23.8813
	55	5.7426	4.0997	1.6429		55	36.9435	27.851	9.0925		55	92.8962	68.7807	24.1154
	56	5.7125	4.0739	1.6386		56	36.8128	27.7845	9.0282		56	92.6008	68.723	23.8778
	57	5.6465	4.0228	1.6238		57	36.422	27.5703	8.8517		57	91.6878	68.5549	23.133
	58	5.5433	3.945	1.5983		58	35.7064	27.1534	8.553		58	89.8733	68.1101	21.7632
	59	5.4004	3.838	1.5623		59	34.4978	26.3901	8.1077		59	86.2106	66.7286	19.4821
	60	5.2121	3.6963	1.5158		60	32.0215	24.5887	7.4328		60	71.4333	57.2504	14.1829
	61	3.2659	2.0373	1.2285		61	15.5933	10.4758	5.1175		61	35.8205	27.3274	8.4931
	62	3.2347	2.0149	1.2198		62	15.3763	10.3357	5.0406		62	35.3221	27.0017	8.3205
	63	3.183	1.98	1.2029		63	15.071	10.1533	4.9177		63	34.6302	26.5813	8.0489
	64	3.1124	1.934	1.1784		64	14.6845	9.9309	4.7536		64	33.7597	26.0706	7.689
	65	3.0244	1.8776	1.1468		65	14.2144	9.6632	4.5513		65	32.6968	25.4486	7.2481
	66	2.9197	1.811	1.1087		66	13.6523	9.3392	4.3132		66	31.4069	24.6716	6.7352
	67	2.7993	1.7344	1.0648		67	12.9836	8.9418	4.0418		67	29.8287	23.6657	6.163
	68	2.6636	1.6477	1.0158		68	12.1848	8.4453	3.7395		68	27.8568	22.309	5.5478
	69	2.5129	1.5505	0.9624		69	11.2157	7.8076	3.4081		69	25.2974	20.3932	4.9042
	70	2.3466	1.4417	0.9049		70	9.9559	6.9108	3.0451		70	21.6733	17.4403	4.233
	71	0.8821	0.5291	0.353		71	0.6207	0.4108	0.2099		71	0.4248	0.2874	0.1374
	72	0.8764	0.5252	0.3512		72	0.6184	0.4086	0.2099		72	0.4249	0.2871	0.1378
	73	0.8675	0.5192	0.3483		73	0.6147	0.4049	0.2098		73	0.425	0.2867	0.1383
	74	0.8559	0.5115	0.3444		74	0.61	0.4003	0.2098		74	0.4256	0.2864	0.1392
	75	0.8418	0.5023	0.3395		75	0.6046	0.3947	0.2099		75	0.4268	0.2864	0.1404
	76	0.8254	0.4916	0.3338		76	0.5984	0.3882	0.2101		76	0.4284	0.2865	0.142
	77	0.8069	0.4795	0.3274		77	0.5914	0.3809	0.2104		77	0.4304	0.2866	0.1438
	78	0.786	0.4657	0.3203		78	0.5833	0.3726	0.2107		78	0.4322	0.2864	0.1458
	79	0.7627	0.4503	0.3125		79	0.5739	0.363	0.2109		79	0.4335	0.2857	0.1478
	80	0.7367	0.4327	0.304		80	0.5624	0.3517	0.2107		80	0.4334	0.2838	0.1496
	81	0.5156	0.3074	0.2082		81	0.4121	0.243	0.1691		81	0.3274	0.2088	0.1186
	82	0.5127	0.305	0.2077		82	0.4119	0.2425	0.1693		82	0.3279	0.2088	0.1191
	83	0.5092	0.3019	0.2073		83	0.4117	0.2419	0.1698		83	0.3291	0.2091	0.12
	84	0.5054	0.2984	0.207		84	0.412	0.2413	0.1707		84	0.3312	0.2097	0.1215
	85	0.5015	0.2945	0.2071		85	0.4127	0.2408	0.172		85	0.3343	0.2108	0.1235
	86	0.4977	0.2903	0.2074		86	0.4141	0.2404	0.1737		86	0.3384	0.2124	0.126
	87	0.4939	0.2859	0.208		87	0.4158	0.2401	0.1757		87	0.3431	0.2142	0.129
	88	0.4901	0.2812	0.2089		88	0.4179	0.2399	0.178		88	0.3484	0.2162	0.1323
	89	0.486	0.2762	0.2098		89	0.4199	0.2394	0.1805		89	0.3539	0.2182	0.1358
	90	0.4813	0.2706	0.2107		90	0.4216	0.2387	0.1829		90	0.3592	0.2199	0.1393
	91	0.4549	0.2514	0.2035		91	0.4011	0.2243	0.1768		91	0.354	0.2155	0.1385
	92	0.4545	0.2512	0.2033		92	0.4003	0.2236	0.1767		92	0.3546	0.2166	0.138
	93	0.4541	0.2507	0.2034		93	0.3997	0.2228	0.1769		93	0.3558	0.2178	0.1381
	94	0.4539	0.2501	0.2038		94	0.3995	0.2221	0.1774		94	0.3579	0.2193	0.1386
	95	0.4539	0.2494	0.2045		95	0.3998	0.2214	0.1784		95	0.361	0.2212	0.1398
	96	0.4542	0.2486	0.2056		96	0.4007	0.2209	0.1798		96	0.3649	0.2233	0.1416
	97	0.4546	0.2477	0.2069		97	0.4021	0.2205	0.1816		97	0.3697	0.2257	0.144
	98	0.4551	0.2468	0.2084		98	0.404	0.2203	0.1837		98	0.375	0.2282	0.1467
	99	0.4554	0.2455	0.2099		99	0.4059	0.22	0.1859		99	0.3804	0.2306	0.1498
	100	0.4551	0.2438	0.2112		100	0.4076	0.2195	0.1881		100	0.3855	0.2326	0.1529
	101	0.4388	0.2386	0.2002		101	0.4024	0.2175	0.1849		101	0.3806	0.2293	0.1513
	102	0.4402	0.2392	0.201		102	0.3998	0.2164	0.1835		102	0.3801	0.2288	0.1512
	103	0.4415	0.2395	0.202		103	0.3975	0.2152	0.1823		103	0.3799	0.2285	0.1514
	104	0.4428	0.2397	0.2031		104	0.3957	0.2142	0.1815		104	0.3803	0.2284	0.1519
	105	0.4443	0.2399	0.2045		105	0.3945	0.2134	0.181		105	0.3813	0.2286	0.1527
	106	0.446	0.24	0.2061		106	0.394	0.2129	0.181		106	0.383	0.229	0.154
	107	0.4479	0.24	0.2079		107	0.3941	0.2127	0.1815		107	0.3853	0.2297	0.1555
	108	0.4497	0.24	0.2097		108	0.3948	0.2126	0.1823		108	0.3879	0.2306	0.1573
	109	0.4512	0.2397	0.2116		109	0.3958	0.2125	0.1833		109	0.3907	0.2315	0.1593
	110	0.4521	0.2389	0.2132		110	0.3968	0.2124	0.1844		110	0.3933	0.2322	0.1612
	111	0.442	0.2335	0.2085		111	0.392	0.2057	0.1862		111	0.3833	0.2258	0.1575
	112	0.4397	0.2318	0.2079		112	0.3909	0.2042	0.1867		112	0.383	0.2251	0.1579
	113	0.4371	0.2298	0.2073		113	0.3902	0.2028	0.1874		113	0.3832	0.2245	0.1587
	114	0.4346	0.2278	0.2068		114	0.3899	0.2016	0.1883		114	0.384	0.2242	0.1598
	115	0.4323	0.2257	0.2065		115	0.3903	0.2008	0.1894		115	0.3858	0.2243	0.1615
	116	0.4303	0.2238	0.2065		116	0.3913	0.2005	0.1908		116	0.3884	0.2248	0.1635
	117	0.4286	0.2219	0.2067		117	0.3931	0.2006	0.1925		117	0.3917	0.2258	0.166
	118	0.4272	0.2202	0.207		118	0.3953	0.2011	0.1942		118	0.3957	0.227	0.1687
	119	0.4258	0.2183	0.2074		119	0.3977	0.2019	0.1959		119	0.3998	0.2284	0.1715
	120	0.4242	0.2163	0.2078		120	0.4001	0.2027	0.1974		120	0.4038	0.2296	0.1742
	121	0.4151	0.2091	0.206		121	0.3984	0.2018	0.1966		121	0.4033	0.2273	0.176
	122	0.413	0.2079	0.2051		122	0.3966	0.2007	0.1958		122	0.4032	0.2264	0.1769
	123	0.4109	0.2067	0.2042		123	0.3952	0.1999	0.1953		123	0.4034	0.2256	0.1778
	124	0.4091	0.2056	0.2034		124	0.3945	0.1994	0.195		124	0.4039	0.225	0.1789
	125	0.4076	0.2048	0.2028		125	0.3946	0.1995	0.1952		125	0.4049	0.2246	0.1803
	126	0.4066	0.2043	0.2023		126	0.3957	0.2	0.1957		126	0.4064	0.2245	0.1819
	127	0.406	0.204	0.202		127	0.3976	0.2011	0.1965		127	0.4084	0.2248	0.1836
	128	0.4058	0.2039	0.2019		128	0.4001	0.2025	0.1976		128	0.4106	0.2252	0.1854
	129	0.4058	0.2039	0.2018		129	0.403	0.2041	0.1989		129	0.4128	0.2256	0.1872
	130	0.4056	0.2039	0.2017		130	0.4058	0.2057	0.2001		130	0.4147	0.226	0.1887
	131	0.4093	0.2044	0.205		131	0.4041	0.2054	0.1987		131	0.4085	0.2185	0.1899
	132	0.409	0.2039	0.2051		132	0.4051	0.2067	0.1984		132	0.4082	0.2173	0.1909
	133	0.4089	0.2035	0.2055		133	0.4061	0.208	0.1981		133	0.4082	0.2163	0.1919
	134	0.4093	0.2032	0.2061		134	0.4073	0.2095	0.1978		134	0.4088	0.2156	0.1931
	135	0.4102	0.2032	0.207		135	0.4087	0.211	0.1976		135	0.41	0.2154	0.1945
	136	0.4118	0.2036	0.2083		136	0.4104	0.2127	0.1976		136	0.4118	0.2157	0.1962
	137	0.414	0.2043	0.2098		137	0.4122	0.2145	0.1977		137	0.4143	0.2164	0.1979
	138	0.4167	0.2052	0.2115		138	0.4141	0.2162	0.1979		138	0.4172	0.2175	0.1997
	139	0.4196	0.2063	0.2133		139	0.4158	0.2177	0.198		139	0.4203	0.2189	0.2014
	140	0.4224	0.2074	0.215		140	0.4169	0.2189	0.198		140	0.4232	0.2204	0.2028
	141	0.4288	0.2116	0.2172		141	0.4161	0.2178	0.1983		141	0.425	0.2226	0.2024
	142	0.4294	0.2114	0.2181		142	0.4148	0.2166	0.1982		142	0.4252	0.2227	0.2025
	143	0.4301	0.2111	0.219		143	0.4135	0.2154	0.1981		143	0.4253	0.2227	0.2026
	144	0.4309	0.211	0.2199		144	0.4124	0.2143	0.1981		144	0.4256	0.2227	0.2029
	145	0.4322	0.2111	0.2211		145	0.4116	0.2134	0.1982		145	0.4262	0.223	0.2033
	146	0.4337	0.2114	0.2223		146	0.4112	0.2127	0.1985		146	0.4273	0.2234	0.204
	147	0.4355	0.212	0.2236		147	0.4113	0.2123	0.1989		147	0.4288	0.2239	0.2048
	148	0.4375	0.2126	0.2248		148	0.4115	0.212	0.1995		148	0.4304	0.2246	0.2058
	149	0.4392	0.2133	0.2259		149	0.4119	0.2118	0.2001		149	0.4321	0.2254	0.2067
	0	0.5337	0.3067	0.2271		0	0.5137	0.2595	0.2543		0	0.5063	0.2469	0.2595			0
model 5	1	0.5403	0.3117	0.2286	model5	1	0.5227	0.2633	0.2595	model 5	1	0.5106	0.2473	0.2633
	2	0.5459	0.3159	0.23		2	0.5307	0.2662	0.2645		2	0.5136	0.247	0.2666
	3	0.5507	0.3193	0.2315		3	0.5379	0.2686	0.2693		3	0.5156	0.2462	0.2694
	4	0.5551	0.3221	0.2329		4	0.5445	0.2705	0.274		4	0.517	0.2453	0.2717
	5	0.559	0.3245	0.2345		5	0.5507	0.2723	0.2784		5	0.5179	0.2444	0.2735
	6	0.5625	0.3265	0.236		6	0.5564	0.2738	0.2826		6	0.5186	0.2437	0.2749
	7	0.5656	0.328	0.2376		7	0.5615	0.2752	0.2864		7	0.519	0.2432	0.2758
	8	0.568	0.3289	0.2391		8	0.566	0.2763	0.2897		8	0.519	0.2428	0.2762
	9	0.5695	0.329	0.2405		9	0.5694	0.2772	0.2922		9	0.5184	0.2424	0.276
	10	0.5695	0.328	0.2415		10	0.5712	0.2774	0.2938		10	0.5167	0.2416	0.2751
	11	0.9249	0.659	0.2658		11	3.1604	1.5441	1.6163		11	8.9104	2.3929	6.5175
	12	0.9585	0.6898	0.2687		12	3.3781	1.6543	1.7239		12	9.6968	2.5753	7.1214
	13	0.989	0.7176	0.2714		13	3.5679	1.7446	1.8233		13	10.3432	2.696	7.6471
	14	1.0166	0.7427	0.274		14	3.7335	1.8202	1.9133		14	10.8829	2.7818	8.1011
	15	1.0414	0.765	0.2764		15	3.8767	1.8839	1.9929		15	11.3346	2.8472	8.4873
	16	1.0631	0.7845	0.2786		16	3.9985	1.9378	2.0607		16	11.7101	2.9015	8.8087
	17	1.0815	0.8009	0.2806		17	4.099	1.9832	2.1157		17	12.0169	2.9503	9.0666
	18	1.0961	0.8138	0.2823		18	4.1772	2.0206	2.1566		18	12.257	2.997	9.26
	19	1.1061	0.8226	0.2835		19	4.2306	2.049	2.1816		19	12.4245	3.0412	9.3832
	20	1.1105	0.8262	0.2843		20	4.2516	2.0632	2.1884		20	12.4772	3.0633	9.4139
	21	2.0073	1.6179	0.3894		21	9.9581	5.0704	4.8878		21	27.2706	7.5789	19.6917
	22	2.062	1.6666	0.3954		22	10.2518	5.2207	5.031		22	28.3223	7.7336	20.5887
	23	2.1046	1.7043	0.4002		23	10.4437	5.3108	5.1329		23	28.9352	7.785	21.1502
	24	2.1361	1.7324	0.4038		24	10.5569	5.3614	5.1956		24	29.2698	7.8002	21.4696
	25	2.1573	1.7513	0.406		25	10.6014	5.3812	5.2202		25	29.3863	7.8006	21.5857
	26	2.1682	1.7614	0.4069		26	10.5805	5.3734	5.2071		26	29.3031	7.7918	21.5112
	27	2.1687	1.7623	0.4064		27	10.4926	5.3365	5.156		27	29.008	7.7691	21.2389
	28	2.1581	1.7535	0.4046		28	10.3301	5.2641	5.066		28	28.4497	7.7135	20.7362
	29	2.1351	1.7336	0.4014		29	10.0735	5.1389	4.9346		29	27.4855	7.5659	19.9197
	30	2.0968	1.6999	0.3969		30	9.6582	4.9011	4.757		30	25.2811	6.856	18.4251
	31	2.1638	1.7685	0.3953		31	7.848	4.0801	3.768		31	14.498	3.7652	10.7328
	32	2.1781	1.7828	0.3952		32	7.8102	4.059	3.7512		32	14.3703	3.7255	10.6448
	33	2.179	1.7851	0.3939		33	7.724	4.018	3.7059		33	14.1612	3.6832	10.478
	34	2.1684	1.7771	0.3913		34	7.5961	3.9611	3.635		34	13.8792	3.6398	10.2395
	35	2.1473	1.7598	0.3875		35	7.4285	3.8879	3.5406		35	13.5223	3.5926	9.9297
	36	2.1163	1.7336	0.3826		36	7.2202	3.796	3.4241		36	13.0815	3.5356	9.5458
	37	2.0754	1.6986	0.3768		37	6.9679	3.6808	3.2871		37	12.5406	3.4587	9.0818
	38	2.0243	1.6542	0.37		38	6.6651	3.5344	3.1306		38	11.8725	3.3439	8.5286
	39	1.962	1.5995	0.3625		39	6.2981	3.3423	2.9559		39	11.0257	3.1546	7.8711
	40	1.8861	1.5319	0.3542		40	5.8256	3.062	2.7636		40	9.801	2.7378	7.0632
	41	1.8831	1.5282	0.3549		41	6.1258	3.2307	2.8951		41	10.3579	2.929	7.4288
	42	1.94	1.5779	0.362		42	6.4881	3.4173	3.0708		42	11.1528	3.1099	8.0429
	43	1.9864	1.6179	0.3685		43	6.7894	3.5602	3.2293		43	11.784	3.2221	8.5619
	44	2.0234	1.6492	0.3742		44	7.042	3.6727	3.3692		44	12.2973	3.2989	8.9984
	45	2.0513	1.6722	0.3791		45	7.2517	3.7623	3.4893		45	12.7168	3.3567	9.3601
	46	2.0701	1.687	0.3831		46	7.4215	3.8334	3.5881		46	13.0573	3.4052	9.6521
	47	2.0792	1.6931	0.3862		47	7.5522	3.8883	3.6639		47	13.3271	3.4501	9.877
	48	2.0777	1.6897	0.3881		48	7.6421	3.9273	3.7147		48	13.5281	3.494	10.0342
	49	2.0639	1.6752	0.3887		49	7.6848	3.9471	3.7377		49	13.6527	3.5357	10.117
	50	2.0349	1.6468	0.3881		50	7.6564	3.9285	3.7279		50	13.6439	3.5482	10.0957
	51	2.0318	1.6289	0.4029		51	9.9559	5.028	4.9279		51	27.2445	7.5488	19.6958
	52	2.0514	1.6469	0.4046		52	10.2128	5.1521	5.0606		52	28.2274	7.699	20.5283
	53	2.0599	1.6549	0.405		53	10.3745	5.2223	5.1521		53	28.8035	7.7546	21.0489
	54	2.0583	1.6541	0.4042		54	10.4607	5.2563	5.2045		54	29.1172	7.776	21.3412
	55	2.0474	1.6452	0.4023		55	10.4793	5.2608	5.2186		55	29.2213	7.7829	21.4384
	56	2.0273	1.6281	0.3992		56	10.4319	5.2373	5.1946		56	29.1295	7.7803	21.3492
	57	1.9978	1.6028	0.395		57	10.3149	5.1829	5.132		57	28.8258	7.763	21.0627
	58	1.9583	1.5685	0.3898		58	10.1185	5.0888	5.0297		58	28.2539	7.7105	20.5433
	59	1.9076	1.524	0.3835		59	9.8192	4.9339	4.8853		59	27.263	7.5591	19.7039
	60	1.843	1.4667	0.3763		60	9.3395	4.645	4.6945		60	24.9734	6.7997	18.1736
	61	1.1138	0.8241	0.2897		61	4.1918	2.0259	2.1659		61	13.2248	3.3031	9.9217
	62	1.1042	0.8153	0.2889		62	4.1363	1.9986	2.1377		62	13.0333	3.255	9.7783
	63	1.0898	0.8023	0.2875		63	4.0571	1.9631	2.0941		63	12.7676	3.206	9.5616
	64	1.0714	0.7857	0.2858		64	3.9566	1.9199	2.0367		64	12.4325	3.1555	9.277
	65	1.0495	0.7659	0.2836		65	3.8356	1.8688	1.9669		65	12.0246	3.0995	8.9252
	66	1.0244	0.7432	0.2813		66	3.6942	1.8083	1.8859		66	11.5355	3.0314	8.5042
	67	0.9964	0.7177	0.2787		67	3.5314	1.7366	1.7948		67	10.9516	2.9408	8.0108
	68	0.9655	0.6895	0.276		68	3.3456	1.6508	1.6948		68	10.2523	2.8112	7.4411
	69	0.9314	0.6582	0.2732		69	3.1332	1.5462	1.587		69	9.4013	2.6126	6.7887
	70	0.8935	0.6234	0.2702		70	2.8844	1.4118	1.4726		70	8.2708	2.2417	6.0291
	71	0.5819	0.3467	0.2352		71	0.5251	0.2531	0.272		71	0.4467	0.2091	0.2376
	72	0.5796	0.3457	0.2339		72	0.5216	0.2521	0.2695		72	0.4471	0.2092	0.2379
	73	0.5763	0.3438	0.2324		73	0.5174	0.251	0.2665		73	0.4473	0.2092	0.2381
	74	0.5723	0.3414	0.2309		74	0.5129	0.2497	0.2632		74	0.4476	0.2093	0.2384
	75	0.5679	0.3385	0.2294		75	0.5081	0.2484	0.2597		75	0.4482	0.2095	0.2387
	76	0.5632	0.3353	0.2279		76	0.5032	0.247	0.2562		76	0.449	0.2099	0.2391
	77	0.5582	0.3316	0.2266		77	0.4981	0.2455	0.2527		77	0.4499	0.2103	0.2395
	78	0.5528	0.3275	0.2252		78	0.4927	0.2436	0.2491		78	0.4504	0.2107	0.2398
	79	0.5466	0.3227	0.224		79	0.4867	0.2412	0.2455		79	0.4504	0.2107	0.2397
	80	0.5394	0.3167	0.2226		80	0.4796	0.2378	0.2418		80	0.4489	0.2099	0.239
	81	0.4862	0.2716	0.2146		81	0.4001	0.199	0.2011		81	0.3982	0.201	0.1972
	82	0.4838	0.2708	0.2129		82	0.4006	0.1987	0.2019		82	0.3977	0.2009	0.1968
	83	0.4808	0.2695	0.2114		83	0.4013	0.1986	0.2027		83	0.3974	0.2008	0.1966
	84	0.4778	0.2678	0.2099		84	0.4023	0.1988	0.2036		84	0.3974	0.2009	0.1966
	85	0.4747	0.266	0.2087		85	0.4039	0.1993	0.2046		85	0.398	0.2012	0.1968
	86	0.4719	0.2641	0.2078		86	0.4059	0.2	0.2058		86	0.399	0.2017	0.1973
	87	0.4691	0.262	0.2071		87	0.4082	0.2011	0.2071		87	0.4004	0.2024	0.198
	88	0.4664	0.2597	0.2067		88	0.4108	0.2023	0.2084		88	0.4021	0.2032	0.1989
	89	0.4635	0.257	0.2065		89	0.4133	0.2036	0.2097		89	0.4038	0.204	0.1998
	90	0.4601	0.2538	0.2063		90	0.4153	0.2047	0.2107		90	0.4053	0.2046	0.2007
	91	0.4506	0.2414	0.2091		91	0.4182	0.207	0.2112		91	0.3996	0.2044	0.1952
	92	0.4512	0.242	0.2091		92	0.4187	0.2064	0.2124		92	0.4	0.2051	0.1949
	93	0.4516	0.2426	0.209		93	0.4194	0.2058	0.2136		93	0.4005	0.2058	0.1948
	94	0.452	0.2431	0.2089		94	0.4202	0.2054	0.2148		94	0.4014	0.2065	0.1949
	95	0.4527	0.2438	0.2089		95	0.4215	0.2054	0.2161		95	0.4026	0.2074	0.1952
	96	0.4535	0.2446	0.2089		96	0.4231	0.2056	0.2175		96	0.4043	0.2085	0.1959
	97	0.4544	0.2454	0.209		97	0.425	0.2062	0.2188		97	0.4064	0.2097	0.1968
	98	0.4554	0.2463	0.2091		98	0.427	0.2069	0.2201		98	0.4087	0.2109	0.1978
	99	0.4561	0.2469	0.2092		99	0.4289	0.2077	0.2211		99	0.4109	0.2121	0.1988
	100	0.4562	0.247	0.2092		100	0.4302	0.2085	0.2218		100	0.4128	0.2131	0.1997
	101	0.4497	0.2429	0.2068		101	0.427	0.2058	0.2211		101	0.4125	0.2134	0.1991
	102	0.4485	0.2423	0.2062		102	0.425	0.205	0.22		102	0.4124	0.2124	0.2001
	103	0.4473	0.2416	0.2057		103	0.4229	0.2042	0.2187		103	0.4123	0.2111	0.2011
	104	0.4464	0.241	0.2054		104	0.421	0.2034	0.2176		104	0.4121	0.2098	0.2023
	105	0.4457	0.2405	0.2053		105	0.4196	0.2029	0.2167		105	0.4122	0.2085	0.2037
	106	0.4456	0.2402	0.2054		106	0.4186	0.2026	0.2161		106	0.4125	0.2073	0.2053
	107	0.4458	0.2401	0.2057		107	0.4181	0.2025	0.2157		107	0.413	0.2061	0.2069
	108	0.4462	0.2401	0.2061		108	0.418	0.2025	0.2155		108	0.4135	0.2049	0.2087
	109	0.4467	0.24	0.2067		109	0.4181	0.2026	0.2155		109	0.4139	0.2036	0.2104
	110	0.4468	0.2397	0.2071		110	0.418	0.2026	0.2154		110	0.4138	0.202	0.2118
	111	0.4456	0.2382	0.2075		111	0.4056	0.1954	0.2102		111	0.4153	0.2039	0.2114
	112	0.4469	0.2384	0.2085		112	0.4033	0.1948	0.2085		112	0.4164	0.2053	0.2111
	113	0.4482	0.2386	0.2096		113	0.4014	0.1945	0.207		113	0.4175	0.2067	0.2108
	114	0.4498	0.2388	0.211		114	0.4005	0.1946	0.2058		114	0.4188	0.2083	0.2106
	115	0.4518	0.2391	0.2127		115	0.4005	0.1953	0.2052		115	0.4205	0.21	0.2105
	116	0.4541	0.2397	0.2145		116	0.4016	0.1965	0.2051		116	0.4225	0.2119	0.2106
	117	0.4568	0.2403	0.2165		117	0.4036	0.1981	0.2055		117	0.4248	0.2138	0.211
	118	0.4595	0.2409	0.2186		118	0.4064	0.2	0.2064		118	0.4272	0.2158	0.2114
	119	0.4621	0.2415	0.2206		119	0.4097	0.2021	0.2076		119	0.4294	0.2176	0.2118
	120	0.4641	0.2416	0.2225		120	0.4131	0.2042	0.2089		120	0.4312	0.219	0.2122
	121	0.4631	0.2442	0.2189		121	0.4138	0.207	0.2068		121	0.4297	0.216	0.2137
	122	0.4612	0.2428	0.2184		122	0.4147	0.2089	0.2058		122	0.4275	0.2151	0.2124
	123	0.4591	0.2411	0.218		123	0.416	0.2111	0.2049		123	0.4254	0.2141	0.2113
	124	0.4569	0.2394	0.2175		124	0.4179	0.2136	0.2043		124	0.4237	0.2132	0.2104
	125	0.4548	0.2377	0.2171		125	0.4205	0.2165	0.204		125	0.4225	0.2127	0.2099
	126	0.4529	0.236	0.2168		126	0.4237	0.2196	0.2041		126	0.422	0.2124	0.2096
	127	0.4511	0.2345	0.2166		127	0.4273	0.2228	0.2045		127	0.4222	0.2124	0.2098
	128	0.4494	0.2329	0.2165		128	0.4312	0.226	0.2052		128	0.4228	0.2126	0.2102
	129	0.4476	0.2312	0.2163		129	0.4351	0.2291	0.206		129	0.4235	0.2128	0.2107
	130	0.4453	0.2293	0.216		130	0.4384	0.2317	0.2067		130	0.4242	0.2129	0.2113
	131	0.4501	0.2305	0.2195		131	0.439	0.2321	0.2069		131	0.4224	0.2105	0.2119
	132	0.4486	0.2298	0.2188		132	0.4364	0.2315	0.2049		132	0.4207	0.2088	0.2118
	133	0.4471	0.229	0.2181		133	0.4336	0.2307	0.2029		133	0.419	0.2072	0.2118
	134	0.4456	0.2283	0.2174		134	0.431	0.2298	0.2012		134	0.4177	0.2058	0.2119
	135	0.4445	0.2277	0.2168		135	0.4287	0.229	0.1998		135	0.4169	0.2047	0.2121
	136	0.4438	0.2274	0.2164		136	0.4269	0.2281	0.1988		136	0.4166	0.204	0.2126
	137	0.4434	0.2272	0.2162		137	0.4255	0.2273	0.1982		137	0.4169	0.2037	0.2133
	138	0.4432	0.2272	0.2161		138	0.4245	0.2265	0.198		138	0.4177	0.2036	0.214
	139	0.4431	0.2271	0.216		139	0.4236	0.2256	0.198		139	0.4186	0.2038	0.2148
	140	0.4426	0.2267	0.2159		140	0.4226	0.2245	0.1981		140	0.4194	0.2039	0.2155
	141	0.4394	0.2212	0.2181		141	0.4296	0.2259	0.2037		141	0.4195	0.2057	0.2137
	142	0.4398	0.2217	0.2181		142	0.4298	0.2257	0.2041		142	0.4175	0.2051	0.2124
	143	0.4403	0.2222	0.2181		143	0.4299	0.2254	0.2045		143	0.4156	0.2046	0.2109
	144	0.4411	0.2229	0.2182		144	0.4303	0.2253	0.2049		144	0.4139	0.2043	0.2095
	145	0.4423	0.2238	0.2184		145	0.431	0.2254	0.2056		145	0.4126	0.2043	0.2082
	146	0.4439	0.225	0.2189		146	0.4321	0.2256	0.2065		146	0.4117	0.2046	0.2071
	147	0.4459	0.2265	0.2195		147	0.4335	0.226	0.2075		147	0.4113	0.2052	0.2061
	148	0.4482	0.228	0.2201		148	0.4351	0.2265	0.2087		148	0.4113	0.2059	0.2054
	149	0.4503	0.2296	0.2208		149	0.4367	0.2269	0.2098		149	0.4113	0.2066	0.2047
	0	0.713	0.4628	0.2502		0	0.6492	0.3896	0.2596		0	0.5065	0.3145	0.192			0
model 6	1	0.7341	0.4814	0.2527	model 6	1	0.6676	0.4052	0.2624	model 6	1	0.5067	0.3158	0.1909
	2	0.7528	0.4982	0.2547		2	0.6828	0.4181	0.2647		2	0.5055	0.3162	0.1893
	3	0.7695	0.5132	0.2563		3	0.6957	0.429	0.2667		3	0.5034	0.3159	0.1875
	4	0.7842	0.5266	0.2576		4	0.7067	0.4384	0.2683		4	0.501	0.3152	0.1858
	5	0.797	0.5382	0.2588		5	0.7162	0.4464	0.2697		5	0.4984	0.3143	0.1841
	6	0.8076	0.548	0.2596		6	0.7241	0.4532	0.2709		6	0.4959	0.3134	0.1826
	7	0.8159	0.5557	0.2602		7	0.7305	0.4587	0.2718		7	0.4936	0.3123	0.1812
	8	0.8216	0.5612	0.2605		8	0.7351	0.4628	0.2723		8	0.4913	0.3113	0.18
	9	0.8243	0.5641	0.2602		9	0.7375	0.4654	0.2722		9	0.4889	0.31	0.1788
	10	0.8233	0.5639	0.2594		10	0.7372	0.4659	0.2713		10	0.486	0.3085	0.1775
	11	1.5314	1.1344	0.397		11	5.9567	4.9808	0.9759		11	17.7444	16.7726	0.9717
	12	1.606	1.1963	0.4097		12	6.4074	5.3738	1.0336		12	19.3735	18.3273	1.0462
	13	1.6731	1.2514	0.4216		13	6.8005	5.713	1.0875		13	20.672	19.5537	1.1183
	14	1.7325	1.2998	0.4327		14	7.1423	6.0055	1.1369		14	21.7341	20.5466	1.1875
	15	1.7841	1.3413	0.4427		15	7.4364	6.2555	1.1809		15	22.6144	21.361	1.2534
	16	1.8272	1.3757	0.4515		16	7.6851	6.4663	1.2189		16	23.3455	22.0303	1.3152
	17	1.8613	1.4024	0.4589		17	7.8891	6.6394	1.2497		17	23.9457	22.5741	1.3716
	18	1.8857	1.421	0.4647		18	8.0469	6.7745	1.2724		18	24.4212	23.0013	1.4198
	19	1.8992	1.4307	0.4684		19	8.154	6.8683	1.2857		19	24.7615	23.3061	1.4554
	20	1.9	1.43	0.4699		20	8.1972	6.9095	1.2877		20	24.8853	23.4156	1.4697
	21	3.4463	2.8794	0.5669		21	19.0399	18.428	0.6119		21	54.2218	53.6282	0.5937
	22	3.5567	2.9674	0.5893		22	19.6338	18.9971	0.6367		22	56.3249	55.6822	0.6426
	23	3.6437	3.0337	0.61		23	20.0172	19.359	0.6581		23	57.4863	56.8088	0.6776
	24	3.7088	3.08	0.6288		24	20.2375	19.5612	0.6763		24	58.0979	57.3925	0.7055
	25	3.7526	3.1072	0.6454		25	20.3161	19.6251	0.691		25	58.2973	57.5705	0.7268
	26	3.7752	3.1158	0.6594		26	20.2605	19.5584	0.7021		26	58.122	57.381	0.741
	27	3.7764	3.1059	0.6704		27	20.0668	19.3578	0.709		27	57.5389	56.7944	0.7445
	28	3.7552	3.0771	0.6782		28	19.7184	19.0072	0.7112		28	56.419	55.6875	0.7315
	29	3.71	3.0278	0.6823		29	19.1755	18.4677	0.7078		29	54.3988	53.7021	0.6967
	30	3.6368	2.9545	0.6823		30	18.3179	17.6201	0.6978		30	49.6465	49.0219	0.6246
	31	3.831	3.0707	0.7603		31	14.6986	12.7516	1.9471		31	27.3645	25.4436	1.9209
	32	3.8698	3.093	0.7769		32	14.6412	12.6884	1.9528		32	27.1146	25.2121	1.9026
	33	3.8831	3.0932	0.7899		33	14.4868	12.5425	1.9444		33	26.7148	24.8507	1.8641
	34	3.8735	3.0742	0.7993		34	14.2496	12.3261	1.9235		34	26.1823	24.3687	1.8136
	35	3.8424	3.0375	0.8049		35	13.933	12.0416	1.8913		35	25.5133	23.7582	1.7551
	36	3.7907	2.9838	0.8068		36	13.5345	11.6856	1.8488		36	24.6895	22.9993	1.6902
	37	3.7184	2.9135	0.8049		37	13.0465	11.2498	1.7967		37	23.6748	22.0553	1.6195
	38	3.625	2.826	0.7991		38	12.455	10.7196	1.7354		38	22.4041	20.8607	1.5434
	39	3.5091	2.7198	0.7893		39	11.7347	10.0694	1.6653		39	20.7483	19.2865	1.4619
	40	3.3671	2.5916	0.7754		40	10.8191	9.2326	1.5865		40	18.3234	16.949	1.3744
	41	3.4413	2.7563	0.685		41	12.1854	10.5677	1.6176		41	20.6748	19.2343	1.4404
	42	3.5555	2.8619	0.6936		42	12.9394	11.2511	1.6883		42	22.3714	20.8577	1.5137
	43	3.6479	2.9488	0.6991		43	13.5566	11.8067	1.7499		43	23.6688	22.0876	1.5812
	44	3.7197	3.0183	0.7014		44	14.0656	12.2633	1.8023		44	24.7021	23.0585	1.6436
	45	3.7713	3.0707	0.7007		45	14.4818	12.637	1.8448		45	25.5402	23.8395	1.7007
	46	3.8026	3.1057	0.6969		46	14.8134	12.9366	1.8767		46	26.2211	24.4678	1.7534
	47	3.8129	3.1228	0.6902		47	15.0632	13.166	1.8972		47	26.7645	24.9641	1.8004
	48	3.8008	3.1203	0.6805		48	15.2276	13.3226	1.905		48	27.1755	25.3406	1.8349
	49	3.7639	3.096	0.6678		49	15.2921	13.3936	1.8985		49	27.4388	25.5892	1.8497
	50	3.6974	3.0452	0.6522		50	15.2028	13.3278	1.8751		50	27.451	25.6209	1.83
	51	3.7295	3.0163	0.7132		51	19.696	18.9129	0.7831		51	54.7128	53.9926	0.7203
	52	3.7799	3.0661	0.7138		52	20.2511	19.4635	0.7876		52	56.7763	56.0248	0.7515
	53	3.8062	3.0957	0.7105		53	20.6048	19.8191	0.7857		53	57.9207	57.1627	0.7581
	54	3.81	3.1064	0.7035		54	20.7997	20.0215	0.7782		54	58.5195	57.772	0.7476
	55	3.792	3.0989	0.6931		55	20.8538	20.0879	0.7659		55	58.7047	57.9807	0.7239
	56	3.7526	3.073	0.6796		56	20.7713	20.0222	0.7491		56	58.5102	57.8164	0.6938
	57	3.6913	3.0282	0.6631		57	20.5448	19.8166	0.7282		57	57.8975	57.2403	0.6573
	58	3.6076	2.9636	0.644		58	20.1521	19.4488	0.7033		58	56.7247	56.1083	0.6164
	59	3.4998	2.8774	0.6224		59	19.5437	18.8694	0.6743		59	54.5836	54.0186	0.5649
	60	3.3648	2.7661	0.5987		60	18.5761	17.9352	0.641		60	49.3207	48.8269	0.4938
	61	1.939	1.4541	0.4849		61	8.1232	6.8586	1.2646		61	25.0871	23.7583	1.3287
	62	1.92	1.4379	0.4821		62	8.0169	6.7679	1.249		62	24.7313	23.4359	1.2954
	63	1.8907	1.4134	0.4773		63	7.861	6.6368	1.2242		63	24.2364	22.985	1.2514
	64	1.8523	1.3815	0.4707		64	7.6603	6.4689	1.1914		64	23.6133	22.4138	1.1995
	65	1.8055	1.343	0.4626		65	7.4162	6.2643	1.1518		65	22.8556	21.7136	1.142
	66	1.7512	1.2981	0.4531		66	7.1277	6.0213	1.1064		66	21.9442	20.8638	1.0805
	67	1.6896	1.2472	0.4425		67	6.7927	5.7364	1.0562		67	20.8458	19.8298	1.0159
	68	1.6213	1.1905	0.4308		68	6.4068	5.4047	1.002		68	19.5043	18.5552	0.9491
	69	1.5462	1.1281	0.4181		69	5.9628	5.0181	0.9447		69	17.8232	16.9428	0.8804
	70	1.4642	1.0596	0.4046		70	5.4433	4.5584	0.8849		70	15.5877	14.7775	0.8102
	71	0.7198	0.4793	0.2405		71	0.6766	0.4349	0.2417		71	0.5333	0.3494	0.1839
	72	0.7178	0.4769	0.2409		72	0.6746	0.4335	0.2411		72	0.5307	0.3475	0.1831
	73	0.7135	0.4723	0.2412		73	0.6709	0.4307	0.2401		73	0.5274	0.3451	0.1823
	74	0.7072	0.4659	0.2413		74	0.666	0.427	0.239		74	0.5237	0.3424	0.1814
	75	0.6993	0.4579	0.2415		75	0.66	0.4223	0.2377		75	0.5198	0.3393	0.1805
	76	0.6899	0.4483	0.2416		76	0.6531	0.4166	0.2364		76	0.5157	0.3359	0.1798
	77	0.6792	0.4374	0.2418		77	0.645	0.4099	0.235		77	0.5112	0.332	0.1792
	78	0.6672	0.4252	0.242		78	0.6356	0.4021	0.2335		78	0.506	0.3275	0.1785
	79	0.6537	0.4118	0.2419		79	0.6246	0.3929	0.2318		79	0.4999	0.322	0.1779
	80	0.6387	0.3972	0.2415		80	0.6114	0.3817	0.2297		80	0.492	0.3151	0.1769
	81	0.5354	0.3312	0.2042		81	0.4275	0.2561	0.1714		81	0.3545	0.2278	0.1267
	82	0.5342	0.3294	0.2048		82	0.4269	0.2558	0.171		82	0.353	0.2258	0.1272
	83	0.5322	0.3266	0.2056		83	0.4262	0.2553	0.1709		83	0.3519	0.2239	0.128
	84	0.5298	0.3232	0.2066		84	0.4257	0.2547	0.171		84	0.3513	0.2222	0.1291
	85	0.5269	0.3192	0.2078		85	0.4255	0.2541	0.1714		85	0.3514	0.2209	0.1305
	86	0.5239	0.3147	0.2092		86	0.4257	0.2535	0.1722		86	0.3522	0.2198	0.1324
	87	0.5207	0.3099	0.2108		87	0.4262	0.2529	0.1732		87	0.3536	0.2191	0.1345
	88	0.5172	0.3047	0.2124		88	0.4268	0.2523	0.1745		88	0.3554	0.2186	0.1369
	89	0.5132	0.2992	0.214		89	0.4273	0.2514	0.1759		89	0.3575	0.2182	0.1393
	90	0.5084	0.2931	0.2153		90	0.4272	0.2501	0.1772		90	0.3595	0.2178	0.1417
	91	0.4912	0.2838	0.2074		91	0.3888	0.2264	0.1623		91	0.3394	0.2044	0.135
	92	0.4906	0.2834	0.2072		92	0.3881	0.2261	0.1621		92	0.3405	0.2058	0.1347
	93	0.4896	0.2823	0.2073		93	0.3878	0.2256	0.1621		93	0.3424	0.2076	0.1348
	94	0.4885	0.2809	0.2076		94	0.3879	0.2252	0.1626		94	0.345	0.2098	0.1352
	95	0.4875	0.2792	0.2083		95	0.3886	0.225	0.1636		95	0.3484	0.2123	0.1361
	96	0.4866	0.2772	0.2094		96	0.39	0.2249	0.1651		96	0.3527	0.2152	0.1374
	97	0.4858	0.275	0.2108		97	0.392	0.225	0.167		97	0.3577	0.2185	0.1392
	98	0.485	0.2726	0.2124		98	0.3944	0.2252	0.1692		98	0.3632	0.2219	0.1413
	99	0.4838	0.2698	0.214		99	0.397	0.2254	0.1716		99	0.3689	0.2254	0.1436
	100	0.4821	0.2665	0.2156		100	0.3995	0.2254	0.174		100	0.3745	0.2287	0.1458
	101	0.4642	0.2551	0.2091		101	0.3971	0.2249	0.1722		101	0.3808	0.2348	0.146
	102	0.4608	0.2532	0.2076		102	0.3967	0.2243	0.1724		102	0.38	0.2344	0.1457
	103	0.4573	0.2511	0.2062		103	0.3965	0.2238	0.1728		103	0.3797	0.2342	0.1455
	104	0.454	0.2489	0.2051		104	0.3967	0.2233	0.1734		104	0.3801	0.2344	0.1457
	105	0.4511	0.2468	0.2043		105	0.3974	0.223	0.1744		105	0.3812	0.235	0.1461
	106	0.4487	0.2448	0.2039		106	0.3987	0.2229	0.1758		106	0.383	0.236	0.147
	107	0.4467	0.2429	0.2038		107	0.4003	0.2229	0.1774		107	0.3855	0.2374	0.1481
	108	0.4451	0.2411	0.2041		108	0.4022	0.223	0.1792		108	0.3884	0.2391	0.1494
	109	0.4438	0.2393	0.2045		109	0.4042	0.2232	0.181		109	0.3916	0.2409	0.1507
	110	0.4423	0.2374	0.2049		110	0.4059	0.2231	0.1827		110	0.3947	0.2427	0.152
	111	0.4366	0.2341	0.2025		111	0.3956	0.2166	0.179		111	0.4035	0.2527	0.1508
	112	0.4351	0.2327	0.2024		112	0.394	0.2162	0.1778		112	0.4044	0.254	0.1504
	113	0.4337	0.2313	0.2024		113	0.3927	0.216	0.1767		113	0.4056	0.2556	0.15
	114	0.4326	0.23	0.2026		114	0.3919	0.2161	0.1758		114	0.4075	0.2575	0.15
	115	0.432	0.2289	0.2031		115	0.3917	0.2166	0.1751		115	0.4101	0.2598	0.1503
	116	0.432	0.2281	0.2039		116	0.3922	0.2174	0.1748		116	0.4134	0.2624	0.151
	117	0.4325	0.2275	0.205		117	0.3933	0.2185	0.1748		117	0.4172	0.2652	0.152
	118	0.4333	0.2271	0.2062		118	0.3948	0.2198	0.175		118	0.4215	0.2682	0.1533
	119	0.4342	0.2267	0.2075		119	0.3965	0.2212	0.1753		119	0.4257	0.271	0.1547
	120	0.4349	0.2262	0.2087		120	0.3981	0.2225	0.1756		120	0.4297	0.2737	0.156
	121	0.4327	0.2268	0.206		121	0.3939	0.2171	0.1768		121	0.4222	0.2665	0.1557
	122	0.4357	0.2286	0.2071		122	0.3933	0.2157	0.1776		122	0.4209	0.2658	0.1551
	123	0.4387	0.2303	0.2085		123	0.3929	0.2145	0.1785		123	0.4196	0.2648	0.1547
	124	0.4419	0.2319	0.21		124	0.393	0.2135	0.1795		124	0.4185	0.2638	0.1546
	125	0.4453	0.2335	0.2118		125	0.3936	0.2128	0.1809		125	0.4177	0.2628	0.1548
	126	0.4488	0.235	0.2138		126	0.3948	0.2124	0.1824		126	0.4172	0.2618	0.1554
	127	0.4524	0.2364	0.216		127	0.3965	0.2124	0.1842		127	0.4171	0.2609	0.1562
	128	0.4557	0.2375	0.2182		128	0.3986	0.2126	0.186		128	0.4172	0.2599	0.1573
	129	0.4586	0.2383	0.2203		129	0.4007	0.213	0.1877		129	0.4173	0.2587	0.1585
	130	0.4606	0.2386	0.2221		130	0.4026	0.2134	0.1892		130	0.417	0.2574	0.1596
	131	0.4576	0.2377	0.2198		131	0.4059	0.2153	0.1906		131	0.403	0.2456	0.1574
	132	0.456	0.2368	0.2192		132	0.4064	0.2153	0.1911		132	0.4026	0.2461	0.1564
	133	0.4545	0.2357	0.2187		133	0.4071	0.2154	0.1917		133	0.4023	0.2468	0.1555
	134	0.4531	0.2347	0.2184		134	0.4081	0.2156	0.1925		134	0.4024	0.2476	0.1548
	135	0.4521	0.2337	0.2184		135	0.4096	0.216	0.1935		135	0.403	0.2487	0.1543
	136	0.4515	0.2329	0.2187		136	0.4116	0.2168	0.1948		136	0.404	0.2499	0.1542
	137	0.4513	0.232	0.2192		137	0.414	0.2178	0.1962		137	0.4055	0.2512	0.1543
	138	0.4512	0.2312	0.22		138	0.4167	0.2189	0.1978		138	0.4072	0.2525	0.1547
	139	0.4511	0.2303	0.2208		139	0.4194	0.2202	0.1992		139	0.409	0.2538	0.1553
	140	0.4506	0.2292	0.2214		140	0.4219	0.2214	0.2004		140	0.4105	0.2548	0.1557
	141	0.4513	0.2291	0.2222		141	0.4196	0.2183	0.2013		141	0.4145	0.2565	0.158
	142	0.4506	0.2291	0.2215		142	0.4182	0.2169	0.2014		142	0.4136	0.2553	0.1584
	143	0.4498	0.229	0.2208		143	0.417	0.2154	0.2016		143	0.4128	0.2539	0.1589
	144	0.4492	0.229	0.2202		144	0.4162	0.2142	0.202		144	0.4124	0.2526	0.1598
	145	0.4489	0.2291	0.2197		145	0.4159	0.2132	0.2027		145	0.4123	0.2513	0.161
	146	0.4489	0.2294	0.2195		146	0.4162	0.2124	0.2037		146	0.4128	0.2502	0.1625
	147	0.4492	0.2297	0.2195		147	0.4169	0.2119	0.205		147	0.4137	0.2493	0.1644
	148	0.4496	0.2301	0.2196		148	0.4181	0.2117	0.2064		148	0.415	0.2485	0.1665
	149	0.45	0.2304	0.2196		149	0.4193	0.2115	0.2078		149	0.4164	0.2477	0.1687
	0	1.0451	0.256	0.7891		0	1.2516	0.427	0.8246		0	0.9568	0.4265	0.5303			0
model 7	1	1.0927	0.2584	0.8342	model 7	1	0.5623	0.2272	0.3352	model 7	1	0.405	0.1337	0.2713
	2	1.1372	0.26	0.8772		2	0.5701	0.2311	0.3389		2	0.3996	0.1342	0.2654
	3	1.1786	0.261	0.9176		3	0.5761	0.2338	0.3423		3	0.3934	0.1339	0.2594
	4	1.2164	0.2617	0.9547		4	0.5811	0.2359	0.3452		4	0.3869	0.1333	0.2536
	5	1.2502	0.2624	0.9878		5	0.5854	0.2376	0.3478		5	0.3808	0.1327	0.2481
	6	1.2794	0.263	1.0164		6	0.5894	0.2392	0.3502		6	0.3754	0.1322	0.2432
	7	1.3034	0.2635	1.0399		7	0.5929	0.2407	0.3523		7	0.3711	0.1321	0.239
	8	1.3215	0.2639	1.0577		8	0.5961	0.2421	0.354		8	0.3678	0.1322	0.2356
	9	1.3331	0.2639	1.0692		9	0.5984	0.2433	0.3551		9	0.3654	0.1325	0.2328
	10	1.3371	0.2632	1.0739		10	0.5993	0.2439	0.3554		10	0.3628	0.1323	0.2305
	11	2.0468	0.3524	1.6943		11	19.0509	1.4505	17.6009		11	31.7312	0.8184	30.913
	12	2.1611	0.3619	1.7992		12	20.752	1.5764	19.1761		12	35.1218	0.9132	34.2089
	13	2.2656	0.3692	1.8964		13	22.1179	1.6681	20.4502		13	37.6301	0.9695	36.6609
	14	2.3596	0.3751	1.9846		14	23.2395	1.7388	21.501		14	39.5951	1.0069	38.5884
	15	2.4424	0.3801	2.0623		15	24.171	1.7951	22.3761		15	41.1808	1.0333	40.1477
	16	2.5129	0.3845	2.1284		16	24.9453	1.841	23.1045		16	42.4753	1.0522	41.4232
	17	2.5702	0.3884	2.1818		17	25.5815	1.879	23.7027		17	43.5261	1.0654	42.4608
	18	2.613	0.3916	2.2214		18	26.0856	1.9107	24.1751		18	44.3502	1.0733	43.2769
	19	2.64	0.394	2.246		19	26.4463	1.9362	24.5102		19	44.9238	1.0749	43.849
	20	2.6493	0.3949	2.2544		20	26.5839	1.9491	24.6348		20	44.9796	1.0531	43.9266
	21	2.8475	0.3863	2.4613		21	42.2752	0.6959	41.5798		21	101.844	0.5575	101.287
	22	2.8439	0.3925	2.4514		22	43.6822	0.7172	42.9654		22	105.798	0.566	105.233
	23	2.8197	0.3965	2.4232		23	44.4408	0.728	43.7132		23	107.711	0.569	107.142
	24	2.7773	0.3993	2.378		24	44.781	0.7342	44.0471		24	108.643	0.5706	108.073
	25	2.7185	0.4013	2.3173		25	44.786	0.7381	44.0482		25	108.902	0.5715	108.331
	26	2.6446	0.4025	2.2421		26	44.4727	0.7404	43.7327		26	108.56	0.572	107.989
	27	2.5567	0.4027	2.154		27	43.8057	0.7414	43.0648		27	107.537	0.5721	106.965
	28	2.4556	0.4015	2.0542		28	42.6766	0.7409	41.9365		28	105.511	0.5715	104.94
	29	2.3416	0.3978	1.9439		29	40.8096	0.7369	40.0736		29	101.377	0.5678	100.81
	30	2.213	0.3891	1.8239		30	37.105	0.6935	36.4114		30	81.9938	0.4365	81.5573
	31	1.3482	0.2868	1.0614		31	14.3962	2.6679	11.7283		31	39.4527	1.6861	37.7665
	32	1.2374	0.2876	0.9498		32	14.1039	2.6629	11.441		32	38.9123	1.6948	37.2175
	33	1.1279	0.2881	0.8398		33	13.7355	2.6477	11.0878		33	38.1652	1.695	36.4702
	34	1.0234	0.2888	0.7347		34	13.297	2.6227	10.6743		34	37.23	1.689	35.541
	35	0.9273	0.2896	0.6377		35	12.7848	2.5857	10.1992		35	36.0923	1.6764	34.4161
	36	0.8422	0.2905	0.5517		36	12.1885	2.5327	9.6559		36	34.7131	1.6552	33.058
	37	0.7698	0.2913	0.4785		37	11.4895	2.4571	9.0325		37	33.0199	1.6214	31.3986
	38	0.711	0.2915	0.4195		38	10.6571	2.3477	8.3095		38	30.8783	1.5667	29.3118
	39	0.6651	0.2902	0.3749		39	9.6384	2.1831	7.4554		39	28.0038	1.4681	26.5359
	40	0.6306	0.2864	0.3442		40	8.3056	1.8916	6.414		40	23.5672	1.2135	22.3537
	41	0.6429	0.2857	0.3572		41	10.0024	2.3944	7.6081		41	27.7159	1.3718	26.3443
	42	0.6878	0.2904	0.3974		42	11.0319	2.5752	8.4567		42	30.623	1.4652	29.1579
	43	0.7454	0.2934	0.452		43	11.8658	2.6953	9.1706		43	32.8067	1.518	31.2889
	44	0.8164	0.2953	0.5211		44	12.5631	2.778	9.7851		44	34.5401	1.5503	32.9899
	45	0.9002	0.2967	0.6035		45	13.1562	2.8357	10.3205		45	35.9561	1.5705	34.3857
	46	0.9952	0.2979	0.6973		46	13.6645	2.8756	10.7889		46	37.1275	1.5827	35.545
	47	1.0987	0.2988	0.7999		47	14.0987	2.9022	11.1965		47	38.0943	1.5889	36.5055
	48	1.2076	0.2994	0.9082		48	14.4631	2.9179	11.5451		48	38.8718	1.5898	37.2821
	49	1.3181	0.2993	1.0188		49	14.7529	2.9223	11.8306		49	39.4434	1.5843	37.8591
	50	1.4259	0.2976	1.1283		50	14.9295	2.9008	12.0287		50	39.6093	1.5536	38.0557
	51	2.2831	0.3905	1.8926		51	40.6611	0.7004	39.9613		51	101.32	0.5972	100.723
	52	2.3954	0.3924	2.003		52	42.4864	0.7042	41.7828		52	105.449	0.6009	104.848
	53	2.4955	0.3918	2.1037		53	43.5951	0.7047	42.8907		53	107.464	0.6018	106.862
	54	2.5831	0.3896	2.1934		54	44.2499	0.7034	43.5467		54	108.472	0.6019	107.87
	55	2.6572	0.3865	2.2708		55	44.5552	0.7006	43.8548		55	108.793	0.6016	108.192
	56	2.7168	0.3825	2.3343		56	44.5446	0.6957	43.8491		56	108.508	0.601	107.907
	57	2.7604	0.3777	2.3827		57	44.2007	0.6879	43.513		57	107.54	0.6	106.94
	58	2.7861	0.3716	2.4145		58	43.4408	0.6748	42.7663		58	105.577	0.5975	104.98
	59	2.7918	0.3634	2.4284		59	42.0365	0.6493	41.3876		59	101.538	0.5892	100.949
	60	2.7733	0.3507	2.4225		60	38.9871	0.5504	38.4367		60	82.707	0.3902	82.3168
	61	2.5928	0.3489	2.2439		61	26.0803	2.1321	23.9483		61	44.4912	0.982	43.5093
	62	2.5622	0.3486	2.2136		62	25.725	2.1032	23.6219		62	43.9343	0.9808	42.9536
	63	2.5165	0.3475	2.169		63	25.2232	2.0674	23.156		63	43.1354	0.9737	42.1618
	64	2.4571	0.3459	2.1112		64	24.5866	2.0242	22.5626		64	42.118	0.9618	41.1563
	65	2.3851	0.3439	2.0412		65	23.8094	1.9718	21.8377		65	40.8664	0.9447	39.9219
	66	2.3016	0.3413	1.9603		66	22.8729	1.9074	20.9657		66	39.3363	0.9209	38.4156
	67	2.2074	0.3379	1.8695		67	21.7447	1.8265	19.9185		67	37.4453	0.8873	36.5582
	68	2.1034	0.3334	1.7701		68	20.3721	1.7222	18.6503		68	35.0412	0.8374	34.2041
	69	1.9904	0.3269	1.6635		69	18.6686	1.5807	17.0882		69	31.8134	0.7544	31.0593
	70	1.8684	0.3174	1.551		70	16.4488	1.3554	15.0934		70	26.9061	0.5601	26.346
	71	1.2584	0.2618	0.9966		71	0.5786	0.2388	0.3398		71	0.3863	0.1497	0.2366
	72	1.2446	0.2604	0.9842		72	0.5764	0.2384	0.3379		72	0.388	0.1496	0.2384
	73	1.2251	0.2589	0.9662		73	0.5733	0.2378	0.3355		73	0.3901	0.1493	0.2408
	74	1.2004	0.2572	0.9431		74	0.5699	0.237	0.3329		74	0.393	0.1493	0.2437
	75	1.1711	0.2556	0.9155		75	0.5662	0.2361	0.3301		75	0.3967	0.1494	0.2473
	76	1.1377	0.2538	0.8838		76	0.5622	0.2351	0.3272		76	0.401	0.1496	0.2514
	77	1.1006	0.2519	0.8487		77	0.5578	0.2336	0.3242		77	0.4056	0.1497	0.2559
	78	1.0603	0.2495	0.8108		78	0.5524	0.2314	0.3209		78	0.4099	0.1494	0.2605
	79	1.0171	0.2465	0.7706		79	0.5455	0.228	0.3174		79	0.4134	0.1483	0.2651
	80	0.971	0.2424	0.7286		80	0.5356	0.2221	0.3135		80	0.4145	0.1451	0.2694
	81	0.896	0.2263	0.6698		81	0.3665	0.1432	0.2233		81	0.2878	0.0849	0.2029
	82	0.8892	0.2256	0.6636		82	0.3669	0.1429	0.224		82	0.2906	0.0856	0.205
	83	0.8789	0.2249	0.654		83	0.3678	0.143	0.2248		83	0.2944	0.0864	0.208
	84	0.8655	0.2243	0.6413		84	0.3692	0.1435	0.2257		84	0.2994	0.0875	0.212
	85	0.8495	0.2237	0.6258		85	0.3712	0.1444	0.2268		85	0.3056	0.0888	0.2168
	86	0.8312	0.2233	0.6078		86	0.3737	0.1457	0.228		86	0.3128	0.0905	0.2223
	87	0.8109	0.223	0.5878		87	0.3767	0.1473	0.2293		87	0.3209	0.0924	0.2285
	88	0.7888	0.2227	0.5662		88	0.3799	0.1492	0.2307		88	0.3295	0.0943	0.2352
	89	0.7652	0.2221	0.5431		89	0.383	0.1511	0.2319		89	0.3384	0.0962	0.2421
	90	0.7401	0.2211	0.519		90	0.3857	0.1527	0.233		90	0.3469	0.0978	0.2491
	91	0.7101	0.2141	0.496		91	0.3668	0.1464	0.2204		91	0.3364	0.0924	0.244
	92	0.704	0.2126	0.4914		92	0.3678	0.1459	0.222		92	0.3381	0.093	0.2451
	93	0.6959	0.2112	0.4848		93	0.3694	0.1455	0.2239		93	0.3404	0.0938	0.2466
	94	0.6861	0.2098	0.4763		94	0.3717	0.1456	0.2261		94	0.3435	0.095	0.2485
	95	0.6749	0.2086	0.4664		95	0.3747	0.1461	0.2286		95	0.3473	0.0965	0.2508
	96	0.6627	0.2076	0.4551		96	0.3785	0.147	0.2315		96	0.3517	0.0982	0.2535
	97	0.6495	0.2068	0.4427		97	0.3829	0.1483	0.2347		97	0.3566	0.1002	0.2564
	98	0.6356	0.2062	0.4295		98	0.3877	0.1498	0.238		98	0.3617	0.1023	0.2594
	99	0.6211	0.2055	0.4155		99	0.3926	0.1513	0.2412		99	0.3668	0.1044	0.2625
	100	0.6057	0.2048	0.401		100	0.3971	0.1528	0.2443		100	0.3716	0.1063	0.2654
	101	0.574	0.1983	0.3757		101	0.3915	0.1486	0.2428		101	0.3551	0.1039	0.2512
	102	0.5714	0.1989	0.3725		102	0.3904	0.1481	0.2423		102	0.353	0.1035	0.2495
	103	0.5675	0.1994	0.3681		103	0.3896	0.1478	0.2418		103	0.3515	0.1033	0.2482
	104	0.5628	0.2	0.3628		104	0.3892	0.1477	0.2414		104	0.3507	0.1033	0.2474
	105	0.5574	0.2008	0.3566		105	0.3893	0.1481	0.2413		105	0.3507	0.1035	0.2472
	106	0.5514	0.2017	0.3497		106	0.3901	0.1488	0.2414		106	0.3515	0.104	0.2475
	107	0.545	0.2027	0.3424		107	0.3915	0.1498	0.2417		107	0.3531	0.1048	0.2483
	108	0.5382	0.2037	0.3345		108	0.3932	0.1511	0.2422		108	0.3552	0.1056	0.2496
	109	0.531	0.2046	0.3263		109	0.3952	0.1525	0.2427		109	0.3577	0.1065	0.2511
	110	0.5231	0.2053	0.3178		110	0.3972	0.1539	0.2433		110	0.3602	0.1073	0.2529
	111	0.5167	0.2022	0.3146		111	0.3972	0.1572	0.24		111	0.3527	0.1056	0.2471
	112	0.5132	0.201	0.3122		112	0.3964	0.157	0.2394		112	0.3517	0.1051	0.2465
	113	0.5091	0.1999	0.3092		113	0.3959	0.1571	0.2387		113	0.3511	0.1047	0.2464
	114	0.5047	0.1988	0.3059		114	0.3959	0.1576	0.2383		114	0.3513	0.1045	0.2468
	115	0.5003	0.198	0.3023		115	0.3965	0.1585	0.238		115	0.3522	0.1045	0.2477
	116	0.496	0.1975	0.2985		116	0.3977	0.1597	0.2379		116	0.3538	0.1046	0.2492
	117	0.4919	0.1972	0.2947		117	0.3995	0.1614	0.2381		117	0.3561	0.105	0.2511
	118	0.4878	0.197	0.2908		118	0.4017	0.1634	0.2384		118	0.3589	0.1055	0.2533
	119	0.4838	0.1969	0.2868		119	0.4041	0.1654	0.2387		119	0.3619	0.1061	0.2558
	120	0.4795	0.1968	0.2827		120	0.4064	0.1674	0.239		120	0.365	0.1065	0.2584
	121	0.478	0.1956	0.2824		121	0.3973	0.1649	0.2324		121	0.3681	0.1058	0.2623
	122	0.4782	0.1954	0.2828		122	0.3974	0.1646	0.2329		122	0.3696	0.1054	0.2642
	123	0.478	0.1953	0.2827		123	0.3978	0.1642	0.2336		123	0.3717	0.1051	0.2667
	124	0.4777	0.1954	0.2822		124	0.3986	0.164	0.2345		124	0.3747	0.105	0.2698
	125	0.4773	0.1958	0.2815		125	0.3998	0.164	0.2358		125	0.3786	0.1051	0.2735
	126	0.477	0.1965	0.2805		126	0.4017	0.1643	0.2374		126	0.3833	0.1055	0.2778
	127	0.4768	0.1974	0.2793		127	0.4039	0.1647	0.2392		127	0.3887	0.1061	0.2826
	128	0.4764	0.1986	0.2778		128	0.4064	0.1653	0.2411		128	0.3947	0.107	0.2877
	129	0.4758	0.1997	0.276		129	0.4089	0.1659	0.2431		129	0.4009	0.1079	0.293
	130	0.4746	0.2008	0.2738		130	0.4111	0.1662	0.2448		130	0.407	0.1088	0.2982
	131	0.4798	0.2011	0.2787		131	0.4055	0.161	0.2445		131	0.4106	0.1082	0.3024
	132	0.4787	0.2008	0.2779		132	0.407	0.1612	0.2457		132	0.4107	0.108	0.3027
	133	0.4773	0.2005	0.2769		133	0.4088	0.1617	0.2471		133	0.411	0.1078	0.3032
	134	0.4759	0.2003	0.2757		134	0.4112	0.1624	0.2488		134	0.4117	0.1078	0.304
	135	0.4747	0.2003	0.2744		135	0.4141	0.1634	0.2507		135	0.4129	0.1079	0.305
	136	0.4737	0.2006	0.2731		136	0.4175	0.1647	0.2528		136	0.4146	0.1083	0.3063
	137	0.4729	0.2011	0.2718		137	0.4213	0.1662	0.2551		137	0.4167	0.1089	0.3078
	138	0.4723	0.2018	0.2705		138	0.4252	0.1678	0.2574		138	0.4192	0.1097	0.3095
	139	0.4715	0.2025	0.269		139	0.4291	0.1694	0.2597		139	0.4218	0.1105	0.3114
	140	0.4704	0.2031	0.2673		140	0.4324	0.1707	0.2617		140	0.4244	0.1112	0.3132
	141	0.4668	0.2005	0.2663		141	0.4412	0.175	0.2662		141	0.4243	0.1121	0.3123
	142	0.4632	0.1981	0.2652		142	0.4433	0.176	0.2673		142	0.4259	0.1117	0.3141
	143	0.4596	0.1957	0.2639		143	0.4452	0.1769	0.2684		143	0.4276	0.1114	0.3162
	144	0.456	0.1936	0.2624		144	0.4472	0.1778	0.2694		144	0.4295	0.1111	0.3184
	145	0.4529	0.1918	0.261		145	0.4493	0.1787	0.2706		145	0.4318	0.1111	0.3208
	146	0.4502	0.1905	0.2596		146	0.4515	0.1798	0.2717		146	0.4345	0.1112	0.3233
	147	0.448	0.1896	0.2583		147	0.4537	0.1808	0.2729		147	0.4373	0.1115	0.3258
	148	0.4462	0.1891	0.257		148	0.4558	0.1818	0.274		148	0.4402	0.1119	0.3283
	149	0.4446	0.1889	0.2557		149	0.4575	0.1826	0.2749		149	0.443	0.1123	0.3306
	0	0.8418	0.312	0.5298		0	0.4876	0.1931	0.2945		0	0.3363	0.1465	0.1898			0
model 8	1	0.8755	0.3208	0.5547	model 8	1	0.49	0.1942	0.2957	model 8	1	0.3321	0.1469	0.1852
	2	0.9068	0.3284	0.5784		2	0.4904	0.1942	0.2962		2	0.3261	0.1457	0.1804
	3	0.9357	0.3352	0.6005		3	0.4895	0.1935	0.296		3	0.3195	0.1438	0.1757
	4	0.9622	0.3414	0.6208		4	0.488	0.1926	0.2954		4	0.3131	0.1417	0.1714
	5	0.9861	0.347	0.639		5	0.4862	0.1917	0.2945		5	0.3073	0.1397	0.1677
	6	1.0068	0.3521	0.6547		6	0.4844	0.1911	0.2933		6	0.3025	0.1379	0.1646
	7	1.0241	0.3565	0.6676		7	0.4825	0.1907	0.2918		7	0.2988	0.1365	0.1623
	8	1.0375	0.3603	0.6773		8	0.4806	0.1905	0.2901		8	0.2962	0.1355	0.1607
	9	1.0464	0.3631	0.6834		9	0.4784	0.1904	0.288		9	0.2947	0.1349	0.1598
	10	1.0501	0.3646	0.6855		10	0.4754	0.19	0.2853		10	0.2932	0.1338	0.1594
	11	2.6171	0.5463	2.0708		11	17.7579	1.9241	15.834		11	33.6273	0.9598	32.6682
	12	2.7824	0.5698	2.2126		12	19.3712	2.0823	17.2893		12	37.0979	1.0745	36.024
	13	2.933	0.5889	2.3442		13	20.6638	2.1951	18.469		13	39.6583	1.1438	38.515
	14	3.0684	0.6045	2.4639		14	21.7252	2.2802	19.4453		14	41.6629	1.1913	40.4722
	15	3.1878	0.6174	2.5705		15	22.608	2.3466	20.2616		15	43.2824	1.2257	42.0569
	16	3.2903	0.6278	2.6625		16	23.3436	2.3994	20.9444		16	44.6079	1.2512	43.357
	17	3.3747	0.6361	2.7386		17	23.9497	2.4419	21.508		17	45.6889	1.2695	44.4195
	18	3.4397	0.6422	2.7975		18	24.4324	2.4758	21.9567		18	46.5429	1.2813	45.2618
	19	3.483	0.6456	2.8375		19	24.7807	2.501	22.2797		19	47.1463	1.2851	45.8612
	20	3.5011	0.6449	2.8562		20	24.9189	2.5054	22.4135		20	47.2143	1.2574	45.9569
	21	5.0603	0.8193	4.241		21	45.9718	0.7455	45.227		21	110.583	0.6477	109.936
	22	5.1446	0.8544	4.2902		22	47.5806	0.7729	46.8084		22	114.737	0.6536	114.083
	23	5.1896	0.8832	4.3065		23	48.4678	0.7874	47.6809		23	116.715	0.6552	116.061
	24	5.199	0.9075	4.2915		24	48.9048	0.7969	48.1083		24	117.679	0.656	117.023
	25	5.1748	0.9285	4.2463		25	48.9898	0.8039	48.1864		25	117.957	0.6569	117.301
	26	5.1181	0.9465	4.1716		26	48.7467	0.8095	47.9376		26	117.628	0.658	116.971
	27	5.0291	0.961	4.0682		27	48.1427	0.8144	47.329		27	116.609	0.6597	115.95
	28	4.9075	0.9711	3.9364		28	47.0683	0.8188	46.2502		28	114.562	0.662	113.901
	29	4.7514	0.9747	3.7767		29	45.2344	0.8217	44.4134		29	110.303	0.6641	109.64
	30	4.5558	0.9667	3.5892		30	41.3902	0.7862	40.6041		30	87.3406	0.5028	86.8378
	31	2.9049	0.8211	2.0838		31	18.9735	3.4351	15.5384		31	43.3688	1.9584	41.4105
	32	2.8188	0.8403	1.9785		32	18.6571	3.4332	15.2239		32	42.7997	1.964	40.8359
	33	2.7194	0.8579	1.8616		33	18.242	3.4202	14.8218		33	42.0024	1.9617	40.0409
	34	2.61	0.8744	1.7356		34	17.7344	3.3964	14.338		34	40.9985	1.9532	39.0455
	35	2.4929	0.8898	1.6032		35	17.1289	3.359	13.7699		35	39.7721	1.9378	37.8347
	36	2.3704	0.9035	1.4669		36	16.4114	3.3031	13.1084		36	38.2797	1.913	36.3673
	37	2.2438	0.9143	1.3295		37	15.5575	3.2206	12.3371		37	36.4402	1.874	34.5669
	38	2.114	0.9202	1.1938		38	14.5269	3.0983	11.4288		38	34.1035	1.811	32.2933
	39	1.9812	0.9188	1.0624		39	13.2502	2.9101	10.3402		39	30.9535	1.6986	29.2555
	40	1.8443	0.9067	0.9376		40	11.5551	2.5684	8.9867		40	26.0693	1.4119	24.6573
	41	0.7916	0.4375	0.3541		41	5.093	3.374	1.719		41	13.9223	9.8428	4.0795
	42	0.8139	0.4669	0.347		42	5.5716	3.6934	1.8782		42	15.2807	10.8237	4.457
	43	0.8413	0.4982	0.3431		43	5.9758	3.9422	2.0336		43	16.3957	11.5774	4.8182
	44	0.8743	0.5313	0.3429		44	6.3257	4.1432	2.1825		44	17.3414	12.1839	5.1575
	45	0.9127	0.566	0.3467		45	6.6307	4.3084	2.3224		45	18.151	12.6812	5.4698
	46	0.9559	0.6016	0.3543		46	6.8964	4.4455	2.4508		46	18.8424	13.0919	5.7505
	47	1.0025	0.6369	0.3656		47	7.1254	4.56	2.5654		47	19.4248	13.4305	5.9943
	48	1.0508	0.6707	0.3801		48	7.318	4.6549	2.6631		48	19.8991	13.7046	6.1945
	49	1.0986	0.7017	0.3969		49	7.4707	4.7305	2.7401		49	20.2511	13.9106	6.3405
	50	1.1432	0.728	0.4152		50	7.5623	4.7722	2.7902		50	20.3651	13.9536	6.4115
	51	1.4342	0.8537	0.5805		51	20.2251	13.1515	7.0736		51	47.8065	39.1049	8.7016
	52	1.4868	0.8824	0.6044		52	21.0311	13.6435	7.3876		52	49.8204	40.7493	9.071
	53	1.5331	0.9065	0.6266		53	21.5406	13.9169	7.6237		53	50.9417	41.617	9.3247
	54	1.5734	0.9264	0.647		54	21.8525	14.0654	7.7872		54	51.5443	42.0704	9.4739
	55	1.6074	0.9422	0.6653		55	22.0042	14.1237	7.8805		55	51.7484	42.2241	9.5244
	56	1.6346	0.9536	0.681		56	22.0071	14.1028	7.9043		56	51.5854	42.1067	9.4787
	57	1.6541	0.9602	0.6939		57	21.8538	13.9968	7.857		57	51.0244	41.6909	9.3335
	58	1.6649	0.9615	0.7034		58	21.5124	13.7774	7.735		58	49.9462	40.8636	9.0826
	59	1.6658	0.9565	0.7093		59	20.8938	13.3624	7.5314		59	47.9808	39.2663	8.7145
	60	1.6541	0.943	0.711		60	19.5469	12.3144	7.2325		60	41.238	33.0353	8.2027
	61	1.4829	0.8216	0.6613		61	13.1448	8.079	5.0659		61	21.9388	15.1625	6.7763
	62	1.4679	0.8133	0.6546		62	12.9457	7.9646	4.9811		62	21.6038	14.959	6.6447
	63	1.4453	0.801	0.6443		63	12.6716	7.8166	4.855		63	21.1349	14.6797	6.4552
	64	1.4159	0.785	0.6309		64	12.3295	7.6359	4.6936		64	20.5498	14.3313	6.2185
	65	1.3803	0.7655	0.6147		65	11.9191	7.418	4.501		65	19.8485	13.9068	5.9416
	66	1.3391	0.7429	0.5962		66	11.4357	7.1547	4.281		66	19.0215	13.3916	5.6299
	67	1.2926	0.717	0.5756		67	10.8705	6.8337	4.0367		67	18.0501	12.7619	5.2882
	68	1.2414	0.688	0.5534		68	10.2073	6.4356	3.7717		68	16.8985	11.977	4.9214
	69	1.1854	0.6557	0.5297		69	9.4135	5.9241	3.4894		69	15.4858	10.9508	4.535
	70	1.1243	0.6195	0.5049		70	8.3742	5.1807	3.1935		70	13.426	9.2913	4.1348
	71	0.8282	0.4628	0.3654		71	0.4346	0.2197	0.2149		71	0.3594	0.1718	0.1876
	72	0.8237	0.4598	0.3639		72	0.4334	0.2185	0.215		72	0.3608	0.1721	0.1887
	73	0.816	0.4549	0.3611		73	0.4324	0.2172	0.2151		73	0.363	0.1725	0.1905
	74	0.8057	0.4485	0.3572		74	0.4318	0.2162	0.2155		74	0.3662	0.1731	0.1931
	75	0.793	0.4406	0.3524		75	0.4317	0.2155	0.2161		75	0.3706	0.1741	0.1965
	76	0.7784	0.4316	0.3468		76	0.4321	0.215	0.217		76	0.3759	0.1753	0.2006
	77	0.762	0.4216	0.3405		77	0.4328	0.2147	0.2181		77	0.3818	0.1765	0.2053
	78	0.7441	0.4106	0.3336		78	0.4336	0.2142	0.2193		78	0.388	0.1776	0.2103
	79	0.7248	0.3987	0.3261		79	0.434	0.2135	0.2205		79	0.3938	0.1782	0.2155
	80	0.7041	0.386	0.3181		80	0.4335	0.2119	0.2215		80	0.3983	0.1777	0.2207
	81	0.6742	0.3688	0.3055		81	0.3662	0.1754	0.1908		81	0.3343	0.1403	0.194
	82	0.67	0.3661	0.3038		82	0.3671	0.1761	0.191		82	0.3355	0.1401	0.1954
	83	0.6639	0.3623	0.3016		83	0.3684	0.1767	0.1916		83	0.3373	0.14	0.1974
	84	0.6563	0.3575	0.2988		84	0.3701	0.1775	0.1927		84	0.3401	0.1401	0.2
	85	0.6475	0.3519	0.2956		85	0.3725	0.1784	0.1941		85	0.3438	0.1405	0.2032
	86	0.6378	0.3456	0.2922		86	0.3755	0.1794	0.1961		86	0.3483	0.1412	0.2071
	87	0.6272	0.3387	0.2885		87	0.379	0.1806	0.1984		87	0.3536	0.1423	0.2114
	88	0.6159	0.3312	0.2847		88	0.3826	0.1817	0.2009		88	0.3594	0.1435	0.216
	89	0.6037	0.3231	0.2806		89	0.3863	0.1828	0.2035		89	0.3655	0.1448	0.2207
	90	0.5907	0.3145	0.2762		90	0.3896	0.1835	0.206		90	0.3713	0.146	0.2254
	91	0.5812	0.3085	0.2727		91	0.385	0.181	0.204		91	0.3733	0.1457	0.2276
	92	0.5772	0.3055	0.2717		92	0.3842	0.1804	0.2038		92	0.3729	0.1449	0.2279
	93	0.572	0.3017	0.2703		93	0.3837	0.1799	0.2038		93	0.3729	0.1443	0.2285
	94	0.5662	0.2974	0.2688		94	0.3837	0.1796	0.2041		94	0.3735	0.1441	0.2294
	95	0.5598	0.2926	0.2672		95	0.3845	0.1797	0.2047		95	0.3748	0.1441	0.2307
	96	0.5532	0.2875	0.2657		96	0.3859	0.1802	0.2057		96	0.3769	0.1446	0.2323
	97	0.5463	0.2821	0.2642		97	0.3881	0.181	0.2071		97	0.3797	0.1455	0.2341
	98	0.5391	0.2764	0.2627		98	0.3907	0.182	0.2088		98	0.3829	0.1467	0.2362
	99	0.5316	0.2705	0.2611		99	0.3936	0.1831	0.2105		99	0.3863	0.148	0.2383
	100	0.5236	0.2643	0.2593		100	0.3964	0.1841	0.2123		100	0.3896	0.1494	0.2403
	101	0.5175	0.2632	0.2542		101	0.3946	0.1849	0.2097		101	0.3911	0.1482	0.2429
	102	0.5169	0.263	0.2539		102	0.3916	0.183	0.2086		102	0.3914	0.1474	0.244
	103	0.5158	0.2626	0.2532		103	0.3889	0.1811	0.2078		103	0.392	0.1466	0.2454
	104	0.5145	0.2622	0.2524		104	0.3869	0.1795	0.2074		104	0.3931	0.146	0.2471
	105	0.5132	0.2617	0.2514		105	0.3856	0.1782	0.2074		105	0.3948	0.1456	0.2492
	106	0.5118	0.2614	0.2504		106	0.3852	0.1773	0.208		106	0.3971	0.1456	0.2515
	107	0.5103	0.261	0.2493		107	0.3856	0.1767	0.2089		107	0.3998	0.1457	0.2541
	108	0.5087	0.2606	0.2482		108	0.3867	0.1765	0.2102		108	0.4029	0.1461	0.2567
	109	0.5067	0.2599	0.2468		109	0.3881	0.1765	0.2117		109	0.4059	0.1466	0.2593
	110	0.5039	0.2589	0.2451		110	0.3897	0.1766	0.2131		110	0.4087	0.147	0.2617
	111	0.5014	0.2601	0.2413		111	0.3927	0.1787	0.2139		111	0.407	0.1459	0.2612
	112	0.5007	0.26	0.2407		112	0.3919	0.1791	0.2128		112	0.4073	0.1456	0.2617
	113	0.4992	0.2593	0.2399		113	0.3915	0.1796	0.2119		113	0.4078	0.1454	0.2624
	114	0.4971	0.2582	0.2389		114	0.3916	0.1805	0.2112		114	0.4086	0.1453	0.2633
	115	0.4945	0.2568	0.2378		115	0.3924	0.1816	0.2108		115	0.4098	0.1455	0.2644
	116	0.4916	0.255	0.2367		116	0.3939	0.1831	0.2108		116	0.4115	0.1458	0.2658
	117	0.4885	0.2529	0.2355		117	0.396	0.1848	0.2112		117	0.4136	0.1463	0.2673
	118	0.4849	0.2506	0.2343		118	0.3984	0.1866	0.2118		118	0.4159	0.1469	0.269
	119	0.4809	0.2479	0.233		119	0.401	0.1885	0.2126		119	0.4181	0.1475	0.2706
	120	0.4763	0.2448	0.2314		120	0.4034	0.1901	0.2133		120	0.42	0.1479	0.2722
	121	0.476	0.2447	0.2312		121	0.4055	0.1922	0.2133		121	0.416	0.1476	0.2683
	122	0.4738	0.2438	0.23		122	0.4056	0.1928	0.2128		122	0.416	0.1476	0.2683
	123	0.4715	0.2427	0.2288		123	0.4059	0.1933	0.2126		123	0.4159	0.1478	0.2681
	124	0.4691	0.2416	0.2275		124	0.4067	0.1939	0.2128		124	0.4158	0.148	0.2677
	125	0.4669	0.2406	0.2264		125	0.4079	0.1945	0.2134		125	0.4158	0.1486	0.2673
	126	0.465	0.2396	0.2254		126	0.4096	0.1952	0.2145		126	0.416	0.1493	0.2667
	127	0.4632	0.2387	0.2245		127	0.4118	0.1959	0.2159		127	0.4163	0.1503	0.266
	128	0.4616	0.2379	0.2237		128	0.4142	0.1966	0.2176		128	0.4166	0.1513	0.2653
	129	0.4598	0.237	0.2228		129	0.4166	0.1971	0.2195		129	0.4168	0.1524	0.2644
	130	0.4577	0.2359	0.2218		130	0.4187	0.1973	0.2214		130	0.4166	0.1532	0.2634
	131	0.4583	0.2352	0.2232		131	0.4221	0.1994	0.2227		131	0.4121	0.1519	0.2602
	132	0.4578	0.2348	0.223		132	0.422	0.199	0.223		132	0.4117	0.1522	0.2595
	133	0.4571	0.2344	0.2227		133	0.422	0.1987	0.2233		133	0.4114	0.1526	0.2588
	134	0.4564	0.2341	0.2223		134	0.4223	0.1986	0.2238		134	0.4115	0.1532	0.2582
	135	0.4559	0.2339	0.222		135	0.4231	0.1987	0.2243		135	0.412	0.1542	0.2578
	136	0.4556	0.2338	0.2217		136	0.4243	0.1992	0.2251		136	0.413	0.1555	0.2575
	137	0.4554	0.2339	0.2215		137	0.4259	0.2	0.2259		137	0.4145	0.1571	0.2574
	138	0.4553	0.234	0.2213		138	0.4277	0.2009	0.2268		138	0.4163	0.1589	0.2574
	139	0.455	0.2341	0.2209		139	0.4295	0.2019	0.2276		139	0.4181	0.1607	0.2574
	140	0.4542	0.2339	0.2203		140	0.4309	0.2027	0.2282		140	0.4198	0.1624	0.2574
	141	0.4527	0.2322	0.2205		141	0.4322	0.2024	0.2298		141	0.422	0.1619	0.2602
	142	0.4512	0.2319	0.2193		142	0.4311	0.2017	0.2294		142	0.4209	0.1607	0.2601
	143	0.4495	0.2314	0.2181		143	0.43	0.201	0.229		143	0.4198	0.1596	0.2602
	144	0.4479	0.2307	0.2172		144	0.429	0.2004	0.2286		144	0.4191	0.1585	0.2605
	145	0.4466	0.2301	0.2165		145	0.4284	0.2	0.2284		145	0.4188	0.1577	0.2611
	146	0.4457	0.2294	0.2162		146	0.4281	0.1998	0.2283		146	0.4191	0.1572	0.2619
	147	0.445	0.2288	0.2162		147	0.4281	0.1998	0.2283		147	0.4198	0.1569	0.2629
	148	0.4446	0.2282	0.2164		148	0.4283	0.1999	0.2284		148	0.4208	0.1568	0.2639
	149	0.4442	0.2274	0.2168		149	0.4284	0.2	0.2284		149	0.4218	0.1568	0.265

## Sheet: Fig.5
	heritability	EstPOS	POS-SE	LOD	LOD-SE	LOD(A)	LOD(A)-SE	LOD(AbyE	)LOD(AbyE)-SE	EstADD	ADD-SE	AbyE_01	AbyESE_01	AbyE_02	AbyESE_02	Power	FDR	Power	False QTL	QTL	H=0.1	H=0.5	H=0.8	QTL
M1	0.1	25.1275	3.0868	7.1925	2.7668	0.7648	0.7902	6.4277	2.7195	0.0206	0.1966	0.51	0.1692	-0.51	0.1692	0.604	0.417093	604	571	Q1	0.604	0.981	1								H2=0.1	H2=0.5	H2=0.8
		54.8196	3.3358	5.1974	1.6104	3.7405	1.6325	1.4569	1.065	0.4258	0.1213	0.4486	0.0982	-0.4486	0.0982	0.194		194		Q2	0.194	0.813	0.982	Q1	60.4	98.1	100
	0.5	24.9439	1.7364	37.4958	6.5741	0.8374	1.5152	36.6588	7.1969	-0.0095	0.0705	0.4644	0.073	-0.4644	0.073	0.981	0.146527	981	308					Q2	19.4	81.3	98.2			L 1	41.7093	14.6527	8.83165
		54.9077	2.7553	12.07	4.2917	9.169	3.6158	2.901	1.7427	0.237	0.0513	0.2492	0.0547	-0.2492	0.0547	0.813		813		Q1	0.325	0.966	1							L 2	40.0697	11.1466	10.6345
	0.8	24.978	1.296	93.3778	8.9964	0.8348	1.3568	92.5433	9.3166	-0.0002	0.0372	0.4887	0.0397	-0.4887	0.0397	1	0.0883165	1000	192	Q2	0.363	0.979	1	Q1	32.5	96.6	100			L 3	49.8171	21.5088	11.571
		54.9807	2.1284	29.5099	6.7896	25.5138	6.4264	3.9961	1.7182	0.2309	0.0365	0.2325	0.039	-0.2325	0.039	0.982		982						Q2	36.3	97.9	100			L 4	41.7943	16.5403	10.0543
M2	0.1	24.8954	3.3339	6.4281	2.7515	1.8092	1.3193	4.6189	2.9449	0.2367	0.1925	0.5285	0.1162	-0.5285	0.1162	0.325	0.400697	325	460	Q1	0.344	0.885	0.998							L 5	49.6081	21.0526	9.69669
		55.2424	3.1834	6.2659	2.5645	5.3547	2.2703	0.9112	1.5893	0.5214	0.1153	0.2443	0.2009	-0.2443	0.2009	0.363		363		Q2	0.342	0.863	0.989	Q1	34.4	88.5	99.8			L 6	49.4689	19.8721	10.7431
	0.5	24.6366	1.8532	33.1976	7.8883	1.0355	1.5893	32.1624	8.2061	0.0195	0.0778	0.4427	0.0776	-0.4427	0.0776	0.966	0.111466	966	244					Q2	34.2	86.3	98.9			L 7	39.2996	8.22551	15.326
		55.3739	1.8981	32.8218	8.399	25.7812	7.8401	7.0407	3.6496	0.4383	0.0824	0.0192	0.08	-0.0192	0.08	0.979		979		Q1	0.211	0.796	0.987							L 8	28.8688	7.05827	10.1124
	0.8	24.98	1.3437	83.4637	10.988	1.0658	1.564	82.3989	11.2825	0.009	0.0434	0.4796	0.0452	-0.4796	0.0452	1	0.106345	1000	238	Q2	0.587	0.965	0.999	Q1	21.1	79.6	98.7
		55.1	1.405	83.1678	10.5415	66.1694	7.5542	16.9984	5.1231	0.4774	0.0413	0.0052	0.0414	-0.0052	0.0414	1		1000						Q2	58.7	96.5	99.9
M3	0.1	25.032	3.1791	6.5122	2.2091	1.0752	0.9635	5.4371	2.5558	0.0119	0.2902	0.6526	0.154	-0.6526	0.154	0.344	0.498171	344	681	Q1	0.235	0.788	0.983
		54.5673	3.0865	6.533	2.5406	1.188	1.0155	5.345	2.9178	0.0046	0.306	0.6469	0.1674	-0.6469	0.1674	0.342		342		Q2	0.215	0.802	0.982	Q1	23.5	78.8	98.3
	0.5	24.8441	2.2202	22.1316	7.1861	0.8768	1.6467	21.2551	7.5609	-0.003	0.0899	0.4688	0.0931	-0.4688	0.0931	0.885	0.215088	885	479					Q2	21.5	80.2	98.2
		55.0568	2.3238	22.1588	7.0386	0.7915	1.283	21.3676	7.3773	-0.0012	0.085	0.4696	0.0928	-0.4696	0.0928	0.863		863		Q1	0.326	0.901	0.998
	0.8	24.9439	1.5741	59.2398	10.9319	0.8297	1.1996	58.4103	11.0674	-0.0025	0.0462	0.4809	0.0594	-0.4809	0.0594	0.998	0.11571	998	260	Q2	0.34	0.853	0.996	Q1	32.6	90.1	99.8
		54.9869	1.6452	59.4818	10.6478	0.8046	1.2796	58.6775	10.8793	0.0014	0.0454	0.4825	0.0584	-0.4825	0.0584	0.989		989						Q2	34	85.3	99.6
M4	0.1	25.4597	3.2483	5.2133	1.3994	4.1651	1.4468	1.0482	0.7473	0.4602	0.0842	0.4196	0.1087	-0.4196	0.1087	0.211	0.417943	211	573	Q1	0.233	0.99	1
		55.0119	3.059	7.3121	2.7226	5.4729	3.2331	1.8392	1.4437	0.5204	0.1695	0.0293	0.1992	-0.0293	0.1992	0.587		587		Q2	0.235	0.996	1	Q1	23.3	99	100
	0.5	24.7186	2.7347	11.6962	4.1474	9.6889	3.8105	2.0073	1.1577	0.2456	0.0519	0.2334	0.0514	-0.2334	0.0514	0.796	0.165403	796	349					Q2	23.5	99.6	100
		55.0031	1.7452	37.6804	6.4397	28.587	6.9799	9.0934	3.1904	0.47	0.0726	-0.0025	0.0709	0.0025	0.0709	0.965		965		Q1	0.685	0.995	1
	0.8	24.8207	2.1083	29.1239	6.5966	25.2415	6.5563	3.8824	1.4909	0.2303	0.0368	0.2284	0.0347	-0.2284	0.0347	0.987	0.100543	987	222	Q2	0.101	0.967	1	Q1	68.5	99.5	100
		54.951	1.2831	93.3048	9.0084	68.9309	7.0078	24.3738	4.3994	0.4885	0.0393	0.0024	0.0376	-0.0024	0.0376	0.999		999						Q2	10.1	96.7	100
M5	0.1	26.0596	3.3639	5.0936	1.4753	4.2706	1.4062	0.823	0.826	0.4369	0.075	0.4419	0.0786	-0.4419	0.0786	0.235	0.496081	235	443		Fig. 5. Power (A) and FDR (B) for linked QTL model.
		54.4977	3.4599	5.3786	1.6657	4.4784	1.6474	0.9002	0.8532	0.4466	0.0855	0.4572	0.0856	-0.4572	0.0856	0.215		215
	0.5	24.9175	2.704	11.9885	4.3866	6.0688	2.8407	5.9197	2.6694	0.2445	0.0618	0.2429	0.0622	-0.2429	0.0622	0.788	0.210526	788	424
		55.0175	2.6537	11.7737	4.1334	5.9316	2.6649	5.8422	2.5968	0.242	0.0583	0.2414	0.0621	-0.2414	0.0621	0.802		802
	0.8	25.0041	2.0076	29.826	6.9471	7.8787	3.0692	21.9473	5.4122	0.2343	0.0508	0.2362	0.0511	-0.2362	0.0511	0.983	0.0969669	983	211
		55.1864	2.0351	29.6518	6.8804	7.8404	3.0058	21.8114	5.3976	0.2343	0.049	0.235	0.0505	-0.235	0.0505	0.982		982
M6	0.1	25.5583	3.0809	6.6897	2.7231	5.7631	2.9857	0.9266	0.9034	0.6631	0.1739	-0.0134	0.2835	0.0134	0.2835	0.326	0.494689	326	652
		54.7029	3.2625	6.4991	2.4684	5.4638	2.8146	1.0353	0.9879	0.6468	0.1671	-0.0272	0.3029	0.0272	0.3029	0.34		340
	0.5	24.8524	2.2978	21.6526	6.883	21.1079	7.1552	0.5446	0.959	0.4645	0.0923	-0.0015	0.0851	0.0015	0.0851	0.901	0.198721	901	435
		55.1419	2.2551	22.4477	6.6069	21.9246	6.9336	0.5231	0.9905	0.4746	0.0876	0.005	0.085	-0.005	0.085	0.853		853
	0.8	25	1.6301	58.7669	10.3503	57.9708	9.9384	0.7961	1.0137	0.4795	0.0562	0.0001	0.0477	-0.0001	0.0477	0.998	0.107431	998	240
		55.0301	1.6943	59.1763	10.4934	58.3759	10.0513	0.8004	0.9941	0.4815	0.0555	-0.0008	0.0469	0.0008	0.0469	0.996		996
M7	0.1	23.3906	3.1044	6.8547	3.2843	1.1142	1.226	5.7405	2.8232	0.0132	0.1611	0.3653	0.085	-0.3653	0.085	0.233	0.392996	233	303
		56.8766	3.3066	7.0042	3.1876	1.0399	1.1728	5.9643	2.7385	-0.0121	0.1557	-0.3735	0.0799	0.3735	0.0799	0.235		235
	0.5	24.4586	1.7168	45.3869	9.463	0.7075	1.3664	44.6796	9.5697	-0.0019	0.0459	0.4312	0.0529	-0.4312	0.0529	0.99	0.0822551	990	178
		55.508	1.7554	45.1065	9.6593	0.6942	1.3214	44.4124	9.7755	0.0011	0.0455	-0.4295	0.0551	0.4295	0.0551	0.996		996
	0.8	24.919	1.2635	109.311	13.5355	0.571	1.0511	108.74	13.8256	0	0.0235	0.4846	0.0351	-0.4846	0.0351	1	0.150021	1000	353
		55.023	1.2339	109.201	13.5389	0.6012	1.3067	108.6	13.9188	0.0002	0.0241	-0.4847	0.036	0.4847	0.036	1		1000
M8	0.1	24.3197	3.1057	6.4782	2.3984	1.084	0.9074	5.3943	2.4897	0.13	0.1	0.3701	0.0782	-0.3701	0.0782	0.685	0.288688	685	319
		55.4851	3.5477	6.6598	2.6737	3.9811	1.8488	2.6787	1.7937	0.3063	0.0702	-0.1921	0.1777	0.1921	0.1777	0.101		101
	0.5	24.7508	1.6565	49.4012	7.5977	0.808	1.4304	48.5937	8.188	0.0254	0.0418	0.4513	0.0421	-0.4513	0.0421	0.995	0.0705827	995	149
		55.5481	2.1003	22.6478	5.8472	14.4628	4.5519	8.185	2.6896	0.2128	0.036	-0.2037	0.037	0.2037	0.037	0.967		967
	0.8	24.969	1.2522	118.357	9.3862	0.6568	1.1249	117.701	9.8642	0.0058	0.0233	0.4885	0.0232	-0.4885	0.0232	1	0.101124	1000	225
		55.07	1.6701	52.2574	7.23	42.5208	6.9778	9.7366	2.6246	0.2271	0.0211	-0.2279	0.0242	0.2279	0.0242	1		1000

## Sheet: Fig.6
Interval midpoint	H=0.1	H=0.5	H=0.8			Fig. 6. Power analysis by marker interval of chromosome 1 for the linked QTL model.
5	2.4	0.7	0.1
15	9.5	2.9	6.1
25	54	98.1	100
35	24.5	6.8	2
45	12.5	7.5	2.7
55	16.9	77.5	97.9
65	7.5	8.8	1.6
75	1.5	0.2	0.5
85	0.8	0.9	0
95	0.3	0.5	0.4
105	0.2	0.2	0
115	0.3	0	0.1
125	0.3	0.3	0.2
135	0.1	0.2	0.2
145	0.1	0.2	0
5	1.2	0.7	1.1
15	6.1	3.8	5.7
25	28.5	96.4	100
35	15.2	3.7	2.2
45	10.2	4.4	5
55	31.5	96.9	100
65	11.7	4.1	1.6
75	1.6	0.5	0.1
85	0.8	0.7	0.4
95	1.3	0	0.3
105	0.4	0.3	0.4
115	0.1	0.1	0.1
125	0.3	0.1	0
135	0.2	0	0.2
145	0.4	0	0.1
5	1.2	1.5	0.6
15	7.5	5.3	3.5
25	30	87.2	99.8
35	22.7	13.8	4.4
45	24.6	11.8	6.4
55	31.4	84.3	98.7
65	8.6	6.5	2.3
75	2.3	0.9	0.7
85	0.6	1	1
95	0.8	0.2	0.1
105	0.1	0.3	0
115	0.4	0.2	0.1
125	0.2	0.2	0.1
135	0.1	0.2	0.3
145	0.1	0.1	0.2
5	0.6	1.1	0.4
15	4	7.4	1.2
25	17.3	77.1	98.4
35	16.6	10.9	3.1
45	18.8	7.9	7.5
55	51.7	96.3	99.9
65	18.1	2.6	0.7
75	2.4	0.4	0.1
85	0.6	0.6	0.5
95	0.9	0.2	0.5
105	0.1	0.2	0.2
115	0.3	0	0.1
125	0	0.1	0.1
135	0	0.2	0.1
145	0.1	0	0
5	0.9	0.7	1
15	3.4	8.7	2.4
25	18	75.9	98
35	19.6	12.8	4.3
45	15.9	9.2	4.7
55	18.9	76	97.1
65	5.7	10.4	2.9
75	1.1	0.3	0.7
85	0.4	0.2	0.3
95	0.3	0.2	0
105	0.2	0.3	0.1
115	0.1	0.2	0.1
125	0.3	0	0.1
135	0.1	0	0.1
145	0.1	0.3	0.1
5	2.4	1.8	0.8
15	7.3	4.6	2.7
25	27.6	88.4	99.7
35	24.6	13.2	4.4
45	22.1	12	6.2
55	29.9	83.4	99.4
65	9.6	6.8	1.6
75	1.2	0.6	0.7
85	0.7	1.1	0.4
95	0.7	0.2	0.1
105	0	0.3	0.2
115	0.2	0.1	0.5
125	0	0	0.2
135	0	0.1	0
145	0.2	0.3	0.1
5	2.2	0.5	0.3
15	9.5	4.1	10.4
25	22.1	98.9	100
35	1.6	0.3	1.3
45	0.5	1	6.6
55	15.8	99	100
65	13.7	3.1	2.8
75	2.3	0.7	0.1
85	1.5	0.4	0.2
95	0.7	0.6	0.8
105	0.1	0.2	0
115	0.2	0.5	0.1
125	0.2	0.2	0.1
135	0.2	0.1	0.4
145	0.1	0.2	0.3
5	1.6	0.9	0.1
15	10.9	3.2	8.9
25	63.1	99.4	100
35	12.7	0.8	1.1
45	1.5	1.1	2.6
55	8.3	95.8	100
65	4.6	3.8	1.5
75	0.7	0.3	0
85	0.4	0.1	0.1
95	0.1	0	0.3
105	0.2	0	0.1
115	0.1	0.1	0.1
125	0.1	0.1	0
135	0.2	0.1	0
145	0	0.3	0

## Sheet: Fig.7
			LOD	LODA	LODAE
	Chr.	LOD threshold				WSM1	WSM2	WSZ1	WSZ2	WWM1	WWM2	WWZ2				Fig. 7. LOD profiles for MFLW in the maize population by QEI mapping (A) and single-environment analysis (B)
0	1	5.67	2.4731	1.5667	0.9065	0.0016	0.5782	1.0008	0.8159	0.0019	0.0068	0.0022
1	1	5.67	2.6542	1.6461	1.0081	0.0011	0.5817	1.0798	0.9238	0.0009	0.0018	0.0014
2	1	5.67	2.8234	1.7101	1.1133	0.0007	0.5804	1.1586	1.0355	0.0003	0	0.0006
3	1	5.67	2.9827	1.7601	1.2225	0.0004	0.5733	1.2345	1.1449	0	0.0026	0.0001
4	1	5.67	3.1317	1.7955	1.3362	0.0001	0.5597	1.3044	1.2455	0.0002	0.01	0
5	1	5.67	3.2701	1.8171	1.453	0	0.5389	1.3653	1.3315	0.001	0.023	0.0001
6	1	5.67	3.3943	1.8234	1.5709	0	0.5112	1.4145	1.3987	0.0025	0.0408	0.0007
7	1	5.67	3.5002	1.8146	1.6857	0	0.4772	1.4503	1.4448	0.0044	0.0632	0.0017
8	1	5.67	3.5812	1.7888	1.7924	0.0002	0.4383	1.4717	1.4695	0.0068	0.0886	0.0029
9	1	5.67	3.6276	1.7445	1.8831	0.0006	0.3964	1.4787	1.4737	0.0094	0.116	0.0043
10	1	5.67	3.6266	1.6798	1.9468	0.001	0.3535	1.4722	1.4598	0.0122	0.1436	0.0059
11	1	5.67	3.5692	1.5659	2.0033	0	0.3167	1.4576	1.4416	0.0054	0.1722	0.0018
12	1	5.67	3.4702	1.4203	2.0499	0.0016	0.279	1.4314	1.411	0.0004	0.2042	0
13	1	5.67	3.3444	1.2573	2.087	0.0074	0.2395	1.3907	1.3634	0.0011	0.2395	0.0032
14	1	5.67	3.2045	1.0862	2.1183	0.0179	0.1993	1.3347	1.2983	0.0083	0.2771	0.0123
15	1	5.67	3.0598	0.9131	2.1467	0.0334	0.1597	1.2632	1.216	0.0228	0.3163	0.0281
16	1	5.67	2.918	0.7444	2.1736	0.0538	0.1221	1.1776	1.1186	0.0445	0.3553	0.0506
17	1	5.67	2.7839	0.5859	2.198	0.0786	0.0882	1.0803	1.0097	0.0734	0.3931	0.0789
18	1	5.67	2.6605	0.4414	2.2191	0.1069	0.0589	0.9749	0.8938	0.1087	0.428	0.112
19	1	5.67	2.5477	0.3145	2.2333	0.1373	0.0354	0.8658	0.776	0.1495	0.4591	0.1481
20	1	5.67	2.4431	0.2073	2.2358	0.1686	0.0181	0.7573	0.6616	0.1943	0.4855	0.1855
21	1	5.67	2.3416	0.1219	2.2196	0.1995	0.0068	0.6533	0.5546	0.242	0.5068	0.2226
22	1	5.67	2.3123	0.106	2.2063	0.2249	0.0057	0.6217	0.5281	0.2649	0.4962	0.2339
23	1	5.67	2.3181	0.1285	2.1896	0.2494	0.0099	0.635	0.5519	0.2705	0.4652	0.2279
24	1	5.67	2.3104	0.1541	2.1564	0.2769	0.0158	0.6483	0.5769	0.2761	0.4321	0.2209
25	1	5.67	2.2941	0.183	2.1111	0.3076	0.0237	0.6614	0.6031	0.2814	0.3969	0.2128
26	1	5.67	2.2733	0.2161	2.0573	0.3416	0.0338	0.674	0.6303	0.2864	0.36	0.2035
27	1	5.67	2.251	0.2531	1.9979	0.3789	0.0464	0.6858	0.6581	0.2909	0.3216	0.193
28	1	5.67	2.2302	0.2947	1.9355	0.4194	0.0619	0.6964	0.6862	0.2946	0.2821	0.1812
29	1	5.67	2.2126	0.3407	1.8719	0.4626	0.0804	0.7054	0.7142	0.2975	0.2421	0.1682
30	1	5.67	2.2006	0.3923	1.8082	0.5081	0.1022	0.7125	0.7416	0.2992	0.2024	0.1542
31	1	5.67	2.1948	0.4493	1.7455	0.5549	0.1273	0.7171	0.7678	0.2997	0.1637	0.1392
32	1	5.67	2.1963	0.5111	1.6852	0.6022	0.1555	0.7189	0.7923	0.2987	0.127	0.1235
33	1	5.67	2.2065	0.579	1.6276	0.6486	0.1866	0.7176	0.8145	0.2963	0.0933	0.1076
34	1	5.67	2.2252	0.6521	1.5731	0.693	0.2201	0.7131	0.834	0.2924	0.0636	0.0917
35	1	5.67	2.2528	0.7303	1.5225	0.7343	0.2553	0.7052	0.8501	0.2869	0.0389	0.0762
36	1	5.67	2.2894	0.8137	1.4757	0.7713	0.2917	0.694	0.8625	0.2799	0.02	0.0617
37	1	5.67	2.3346	0.9019	1.4327	0.8032	0.3284	0.6796	0.871	0.2717	0.0072	0.0483
38	1	5.67	2.3873	0.9935	1.3938	0.8294	0.3647	0.6624	0.8753	0.2623	0.0009	0.0364
39	1	5.67	2.4469	1.0883	1.3586	0.8495	0.4	0.6428	0.8756	0.2519	0.0007	0.0262
40	1	5.67	2.512	1.1848	1.3271	0.8635	0.4337	0.6211	0.8719	0.2408	0.0064	0.0178
41	1	5.67	2.5801	1.2814	1.2987	0.8717	0.4653	0.5979	0.8646	0.2293	0.0173	0.0111
42	1	5.67	2.6487	1.3765	1.2722	0.8744	0.4946	0.5737	0.8539	0.2175	0.0326	0.0061
43	1	5.67	2.7147	1.4673	1.2474	0.8724	0.5213	0.549	0.8403	0.2057	0.0515	0.0028
44	1	5.67	2.7742	1.5514	1.2228	0.8662	0.5453	0.5241	0.8244	0.194	0.0731	0.0008
45	1	5.67	2.8217	1.6251	1.1965	0.8568	0.5667	0.4995	0.8067	0.1826	0.0966	0
46	1	5.67	2.8508	1.6844	1.1664	0.8448	0.5855	0.4754	0.7877	0.1716	0.1214	0.0003
47	1	5.67	2.8541	1.7247	1.1294	0.8309	0.6019	0.4521	0.7678	0.1612	0.1469	0.0013
48	1	5.67	2.5776	1.4767	1.101	0.7626	0.5895	0.3217	0.6703	0.1974	0.1502	0.0089
49	1	5.67	2.2396	1.1523	1.0873	0.6683	0.5632	0.1829	0.5503	0.2513	0.1453	0.0272
50	1	5.67	1.9362	0.8398	1.0963	0.5625	0.5286	0.0762	0.4306	0.3098	0.1377	0.0565
51	1	5.67	1.6932	0.5592	1.134	0.4503	0.4861	0.0135	0.3165	0.3695	0.1274	0.0968
52	1	5.67	1.5293	0.3274	1.2019	0.3393	0.437	0.0022	0.2142	0.4266	0.1148	0.1473
53	1	5.67	1.4523	0.1558	1.2965	0.2379	0.3835	0.0427	0.1295	0.4778	0.1009	0.2063
54	1	5.67	1.4564	0.0483	1.4081	0.1534	0.3286	0.1284	0.0661	0.5211	0.0866	0.2716
55	1	5.67	1.2825	0.0165	1.266	0.1095	0.2411	0.1562	0.0549	0.492	0.0803	0.2368
56	1	5.67	1.04	0.0022	1.0378	0.0726	0.1477	0.1604	0.0516	0.4321	0.073	0.1752
57	1	5.67	0.8145	0.0017	0.8127	0.0399	0.0695	0.1594	0.0464	0.359	0.0626	0.1172
58	1	5.67	0.63	0.0168	0.6132	0.0158	0.0186	0.153	0.0397	0.279	0.0503	0.068
59	1	5.67	0.4985	0.0446	0.454	0.0027	0.0001	0.1417	0.0324	0.2013	0.0379	0.0316
60	1	5.67	2.0283	0.4496	1.5787	0.0009	0.0042	0.1962	0.0132	0.2186	0.02	1.5457
61	1	5.67	2.4889	0.7581	1.7308	0.0144	0.0175	0.2824	0.0011	0.2597	0.0062	1.8394
62	1	5.67	2.9932	1.1382	1.855	0.0448	0.0406	0.3814	0.0031	0.2992	0.0001	2.1072
63	1	5.67	3.5118	1.5688	1.943	0.0914	0.0724	0.4877	0.0201	0.3335	0.0033	2.3269
64	1	5.67	4.0002	2.0183	1.9819	0.1505	0.1103	0.5946	0.0507	0.3593	0.0152	2.4822
65	1	5.67	4.1899	2.188	2.002	0.17	0.1195	0.6395	0.0617	0.372	0.025	2.5532
66	1	5.67	4.251	2.2311	2.0199	0.1694	0.115	0.6583	0.061	0.3816	0.0329	2.6055
67	1	5.67	4.2905	2.2632	2.0273	0.1681	0.11	0.6758	0.0599	0.3906	0.0424	2.652
68	1	5.67	4.3125	2.2853	2.0272	0.166	0.1045	0.6913	0.0585	0.3987	0.0535	2.6911
69	1	5.67	4.3199	2.2977	2.0222	0.163	0.0986	0.704	0.0566	0.4055	0.0663	2.721
70	1	5.67	4.3151	2.3021	2.0129	0.159	0.0922	0.7132	0.0543	0.4108	0.0808	2.74
71	1	5.67	4.2994	2.2979	2.0016	0.1539	0.0854	0.7182	0.0514	0.4141	0.097	2.7469
72	1	5.67	4.2744	2.2858	1.9886	0.1477	0.0783	0.7185	0.0482	0.4151	0.1147	2.7407
73	1	5.67	4.2408	2.266	1.9749	0.1406	0.0711	0.7138	0.0445	0.4137	0.1337	2.7209
74	1	5.67	4.1985	2.2389	1.9596	0.1326	0.0639	0.704	0.0406	0.4097	0.1537	2.6874
75	1	5.67	4.1473	2.2041	1.9432	0.1238	0.0567	0.6893	0.0365	0.4031	0.1746	2.6408
76	1	5.67	4.0865	2.1616	1.9249	0.1145	0.0497	0.6701	0.0323	0.3941	0.1959	2.5819
77	1	5.67	4.0151	2.1115	1.9037	0.105	0.0431	0.6471	0.0282	0.3827	0.2173	2.512
78	1	5.67	3.9312	2.0531	1.8781	0.0954	0.0368	0.6209	0.0244	0.3695	0.2386	2.433
79	1	5.67	3.8324	1.9866	1.8458	0.0861	0.0311	0.5926	0.0207	0.3548	0.2593	2.3465
80	1	5.67	3.7158	1.9115	1.8043	0.0771	0.0259	0.5628	0.0175	0.3391	0.2793	2.2548
81	1	5.67	3.5779	1.8282	1.7496	0.0687	0.0212	0.5325	0.0145	0.3228	0.2984	2.1598
82	1	5.67	1.7991	1.4327	0.3663	0.0774	0.0284	0.5646	0.0283	0.328	0.2951	0.2866
83	1	5.67	1.8604	1.5455	0.3148	0.0889	0.0387	0.6035	0.0511	0.3336	0.287	0.2735
84	1	5.67	1.9182	1.6544	0.2638	0.1012	0.051	0.641	0.0825	0.3367	0.2765	0.2577
85	1	5.67	1.9746	1.7588	0.2158	0.114	0.0653	0.6753	0.1227	0.3362	0.2635	0.2393
86	1	5.67	2.0297	1.8562	0.1735	0.1268	0.0813	0.705	0.1713	0.3318	0.248	0.2184
87	1	5.67	2.083	1.9448	0.1382	0.1392	0.0988	0.7289	0.2269	0.3232	0.2304	0.1955
88	1	5.67	2.1335	2.022	0.1116	0.1506	0.1172	0.7458	0.2872	0.3105	0.2111	0.1716
89	1	5.67	2.1787	2.0844	0.0944	0.1608	0.1361	0.7552	0.3497	0.2939	0.1907	0.1473
90	1	5.67	2.2155	2.1287	0.0868	0.1693	0.1549	0.7572	0.4117	0.2744	0.1699	0.1237
91	1	5.67	2.2389	2.1501	0.0887	0.1761	0.173	0.7521	0.4709	0.2529	0.1494	0.1016
92	1	5.67	2.2434	2.1447	0.0988	0.1811	0.1902	0.7408	0.5257	0.2307	0.1297	0.0815
93	1	5.67	2.3805	2.2922	0.0883	0.18	0.2258	0.7637	0.5614	0.2563	0.1481	0.0879
94	1	5.67	2.5868	2.517	0.0698	0.176	0.2763	0.8035	0.5906	0.3092	0.1886	0.1073
95	1	5.67	2.8025	2.7457	0.0568	0.171	0.3348	0.8431	0.6192	0.3701	0.2364	0.1296
96	1	5.67	3.0288	2.978	0.0508	0.1648	0.4014	0.8815	0.646	0.4389	0.2921	0.155
97	1	5.67	3.2667	3.2134	0.0533	0.1574	0.4757	0.9172	0.6694	0.515	0.3556	0.1833
98	1	5.67	3.5154	3.4501	0.0653	0.1488	0.5568	0.949	0.6881	0.597	0.4263	0.2144
99	1	5.67	3.7732	3.6858	0.0874	0.1391	0.6433	0.9756	0.7007	0.6832	0.5033	0.2477
100	1	5.67	4.0394	3.9189	0.1205	0.1283	0.7331	0.9957	0.7059	0.7708	0.5847	0.2825
101	1	5.67	4.3092	4.1448	0.1644	0.1168	0.824	1.0085	0.7031	0.8573	0.6687	0.318
102	1	5.67	4.5791	4.3599	0.2192	0.1047	0.9133	1.0134	0.6921	0.94	0.7529	0.3533
103	1	5.67	4.8427	4.5583	0.2843	0.0925	0.9988	1.0104	0.6733	1.0166	0.8347	0.3875
104	1	5.67	5.093	4.7343	0.3588	0.0805	1.0785	0.9997	0.6478	1.0852	0.9121	0.4196
105	1	5.67	5.3218	4.8815	0.4403	0.069	1.1506	0.9821	0.6168	1.1447	0.9832	0.4489
106	1	5.67	5.5184	4.9918	0.5266	0.0583	1.214	0.9585	0.582	1.1944	1.0466	0.4748
107	1	5.67	5.6705	5.0568	0.6138	0.0485	1.2683	0.9301	0.545	1.2344	1.1015	0.4971
108	1	5.67	5.7635	5.067	0.6965	0.0398	1.3132	0.8981	0.5075	1.2651	1.1477	0.5155
109	1	5.67	5.7413	5.0039	0.7374	0.033	1.3175	0.8668	0.4873	1.2697	1.1676	0.5328
110	1	5.67	5.6376	4.887	0.7506	0.0269	1.2968	0.8353	0.4773	1.2594	1.173	0.5522
111	1	5.67	5.4943	4.7352	0.759	0.0209	1.2731	0.8014	0.4662	1.2465	1.1769	0.5728
112	1	5.67	5.3193	4.5551	0.7643	0.0153	1.2459	0.765	0.4538	1.231	1.1784	0.5945
113	1	5.67	5.1194	4.3521	0.7673	0.0103	1.2151	0.7262	0.44	1.2123	1.1771	0.617
114	1	5.67	4.9016	4.1328	0.7688	0.006	1.1803	0.685	0.4247	1.1903	1.1722	0.6402
115	1	5.67	4.67	3.9001	0.7699	0.0026	1.1413	0.6415	0.4079	1.1646	1.1629	0.6635
116	1	5.67	4.4297	3.6593	0.7704	0.0006	1.098	0.596	0.3894	1.135	1.1486	0.6866
117	1	5.67	4.184	3.4127	0.7712	0.0001	1.0504	0.5487	0.3694	1.1013	1.1284	0.7088
118	1	5.67	3.9364	3.1641	0.7723	0.0014	0.9984	0.5001	0.3476	1.0634	1.1017	0.7293
119	1	5.67	3.6898	2.9154	0.7744	0.0049	0.9424	0.4505	0.3245	1.0214	1.0681	0.7475
120	1	5.67	3.4467	2.6692	0.7775	0.0107	0.8827	0.4006	0.2999	0.9754	1.0272	0.7623
121	1	5.67	3.209	2.4276	0.7814	0.0191	0.8199	0.351	0.2742	0.9256	0.9791	0.7731
122	1	5.67	2.9785	2.1918	0.7867	0.0302	0.7546	0.3024	0.2476	0.8726	0.924	0.7791
123	1	5.67	2.7568	1.9636	0.7932	0.0439	0.6878	0.2555	0.2207	0.8168	0.8629	0.7798
124	1	5.67	2.5453	1.7446	0.8007	0.0602	0.6204	0.2112	0.1936	0.759	0.7967	0.7748
125	1	5.67	2.3451	1.5355	0.8096	0.0789	0.5535	0.17	0.1671	0.6999	0.727	0.764
126	1	5.67	2.1571	1.3374	0.8197	0.0996	0.4881	0.1326	0.1414	0.6404	0.6554	0.7476
127	1	5.67	1.9819	1.1511	0.8308	0.1219	0.4252	0.0995	0.1174	0.5813	0.5838	0.7262
128	1	5.67	1.8203	0.9774	0.8429	0.1454	0.3657	0.0711	0.0952	0.5236	0.5137	0.7003
129	1	5.67	1.6726	0.8177	0.8549	0.1696	0.3103	0.0477	0.0754	0.4678	0.447	0.6709
130	1	5.67	1.5392	0.6713	0.8679	0.1939	0.2596	0.0291	0.0578	0.4148	0.3845	0.639
131	1	5.67	1.4197	0.5392	0.8805	0.2179	0.214	0.0154	0.043	0.365	0.3274	0.6055
132	1	5.67	1.3145	0.4221	0.8923	0.2413	0.1735	0.0062	0.0307	0.3188	0.276	0.5714
133	1	5.67	1.2225	0.3199	0.9026	0.2636	0.1382	0.0012	0.0208	0.2765	0.2304	0.5375
134	1	5.67	1.1429	0.2325	0.9104	0.2846	0.1078	0	0.0131	0.2381	0.1906	0.5044
135	1	5.67	1.0747	0.16	0.9147	0.3043	0.0822	0.0022	0.0075	0.2036	0.1563	0.4726
136	1	5.67	1.0157	0.1023	0.9135	0.3224	0.061	0.0072	0.0036	0.173	0.1269	0.4425
137	1	5.67	0.964	0.0586	0.9054	0.339	0.0437	0.0146	0.0013	0.1459	0.1021	0.4143
138	1	5.67	0.9158	0.0278	0.8879	0.354	0.03	0.0239	0.0001	0.1223	0.0813	0.3881
139	1	5.67	0.9512	0.0443	0.9069	0.3485	0.0365	0.0167	0.0009	0.1355	0.0869	0.4123
140	1	5.67	1.0128	0.0822	0.9307	0.3369	0.05	0.0075	0.0036	0.1607	0.1	0.4521
141	1	5.67	1.0837	0.1344	0.9493	0.3239	0.0667	0.0016	0.0084	0.1895	0.1149	0.4954
142	1	5.67	1.1664	0.2017	0.9647	0.3094	0.0869	0	0.0159	0.2223	0.1317	0.5417
143	1	5.67	1.2632	0.2861	0.9771	0.2936	0.1109	0.0036	0.0263	0.2591	0.1502	0.5904
144	1	5.67	1.3751	0.3871	0.988	0.2764	0.1389	0.0134	0.0399	0.2998	0.1704	0.6401
145	1	5.67	1.5039	0.5062	0.9977	0.258	0.1708	0.0301	0.0571	0.3442	0.192	0.6895
146	1	5.67	1.6497	0.6426	1.0071	0.2386	0.2066	0.0545	0.0778	0.3916	0.2144	0.7369
147	1	5.67	1.8127	0.7969	1.0159	0.2185	0.2457	0.0867	0.1021	0.4415	0.2372	0.7806
148	1	5.67	1.9919	0.9669	1.025	0.1978	0.2876	0.1269	0.1296	0.4927	0.2594	0.8191
149	1	5.67	2.1863	1.1522	1.0341	0.1771	0.3315	0.1744	0.16	0.5442	0.2805	0.8512
150	1	5.67	2.394	1.351	1.0431	0.1566	0.3764	0.2285	0.1927	0.5947	0.2996	0.876
151	1	5.67	2.6117	1.5599	1.0518	0.1366	0.4214	0.2878	0.227	0.6429	0.3161	0.8932
152	1	5.67	2.8359	1.776	1.0599	0.1176	0.4656	0.351	0.2622	0.6877	0.3296	0.9026
153	1	5.67	3.0616	1.995	1.0667	0.0998	0.5082	0.4165	0.2975	0.7281	0.3398	0.9047
154	1	5.67	3.2837	2.2126	1.071	0.0834	0.5485	0.4827	0.3325	0.7632	0.3468	0.9002
155	1	5.67	3.495	2.423	1.072	0.0686	0.5858	0.5484	0.3664	0.7926	0.3508	0.8901
156	1	5.67	3.6869	2.6189	1.068	0.0554	0.6199	0.6124	0.3989	0.8161	0.3521	0.8753
157	1	5.67	3.8503	2.7935	1.0569	0.0439	0.6505	0.6736	0.4297	0.8337	0.351	0.857
158	1	5.67	3.9739	2.938	1.0359	0.0341	0.6775	0.7314	0.4585	0.8458	0.3482	0.8361
159	1	5.67	3.77	2.6823	1.0878	0.0217	0.7526	0.5679	0.3712	0.8339	0.3397	0.8349
160	1	5.67	3.343	2.21	1.1331	0.0103	0.8052	0.3502	0.2487	0.7921	0.3149	0.7637
161	1	5.67	3.0488	1.9205	1.1283	0.0121	0.8071	0.2466	0.2079	0.7363	0.2951	0.6834
162	1	5.67	2.8522	1.7583	1.0939	0.025	0.7858	0.2025	0.2153	0.6723	0.2803	0.623
163	1	5.67	2.6083	1.5618	1.0465	0.043	0.7478	0.1576	0.219	0.5961	0.2591	0.551
164	1	5.67	2.3328	1.3418	0.991	0.066	0.6938	0.1146	0.2182	0.5112	0.2324	0.4701
165	1	5.67	2.0409	1.1111	0.9298	0.0934	0.6265	0.0762	0.2125	0.4222	0.2015	0.3847
166	1	5.67	1.7471	0.8813	0.8657	0.1245	0.5505	0.0448	0.2023	0.3348	0.1689	0.3006
167	1	5.67	1.4635	0.6642	0.7993	0.158	0.4713	0.0217	0.1886	0.2543	0.1369	0.2236
168	1	5.67	1.2446	0.1711	1.0735	0.1806	0.4057	0.0132	0.1585	0.1785	0.1159	0.1834
169	1	5.67	1.1707	0.0946	1.076	0.2022	0.3429	0.0077	0.1251	0.2371	0.097	0.1506
170	1	5.67	1.1123	0.0374	1.075	0.2262	0.2805	0.0034	0.0932	0.3079	0.0785	0.1183
171	1	5.67	1.078	0.005	1.073	0.2522	0.22	0.0007	0.0638	0.3923	0.0605	0.0875
172	1	5.67	1.0752	0.0033	1.0719	0.2803	0.163	0	0.0383	0.4908	0.044	0.0594
173	1	5.67	1.1104	0.0365	1.0739	0.3099	0.1114	0.0019	0.0181	0.6039	0.0292	0.0352
174	1	5.67	1.1886	0.1085	1.0801	0.3406	0.0673	0.0068	0.0049	0.7311	0.017	0.0164
175	1	5.67	1.3143	0.2227	1.0917	0.3717	0.0328	0.0151	0.0001	0.8717	0.0076	0.0042
176	1	5.67	1.4901	0.3806	1.1095	0.4023	0.0099	0.0269	0.0049	1.0237	0.0019	0
177	1	5.67	1.717	0.5834	1.1337	0.4316	0.0002	0.0421	0.0198	1.185	0	0.0045
178	1	5.67	1.9938	0.829	1.1648	0.4586	0.0045	0.0604	0.0451	1.3527	0.0024	0.018
179	1	5.67	2.3181	1.1156	1.2025	0.4827	0.0231	0.0812	0.0801	1.524	0.0089	0.0402
180	1	5.67	2.6849	1.4386	1.2463	0.503	0.0551	0.1038	0.1236	1.6956	0.0194	0.0704
181	1	5.67	3.0864	1.7914	1.295	0.5193	0.0993	0.1274	0.1739	1.8647	0.0335	0.1074
182	1	5.67	3.5133	2.1661	1.3472	0.5313	0.1538	0.1514	0.2294	2.0284	0.0509	0.1495
183	1	5.67	3.953	2.5531	1.3999	0.5391	0.2165	0.175	0.2882	2.1846	0.0706	0.1954
184	1	5.67	4.3905	2.9409	1.4496	0.5429	0.2853	0.1978	0.3489	2.3312	0.0925	0.2435
185	1	5.67	4.8069	3.3162	1.4907	0.5431	0.3582	0.2193	0.4098	2.4668	0.1154	0.2924
186	1	5.67	5.1567	3.6389	1.5178	0.5408	0.4287	0.236	0.4666	2.5846	0.1372	0.3367
187	1	5.67	5.2361	3.6941	1.542	0.5403	0.4592	0.2212	0.4925	2.6453	0.141	0.3412
188	1	5.67	5.2821	3.7258	1.5563	0.5387	0.4927	0.2055	0.5205	2.7074	0.145	0.3457
189	1	5.67	5.3027	3.7406	1.5621	0.5358	0.5291	0.189	0.5504	2.7702	0.149	0.35
190	1	5.67	5.3037	3.739	1.5647	0.5314	0.5686	0.1718	0.5823	2.8328	0.1532	0.354
191	1	5.67	5.2908	3.7249	1.5659	0.5251	0.6112	0.1539	0.6161	2.8942	0.1575	0.3576
192	1	5.67	5.2675	3.7002	1.5673	0.5166	0.6568	0.1356	0.6517	2.9531	0.1618	0.3606
193	1	5.67	5.2375	3.6674	1.5702	0.5056	0.7051	0.1171	0.6887	3.0084	0.1661	0.3629
194	1	5.67	5.2028	3.6267	1.576	0.4919	0.7558	0.0986	0.727	3.0586	0.1703	0.3643
195	1	5.67	5.1666	3.5809	1.5857	0.4753	0.8084	0.0805	0.7661	3.1021	0.1744	0.3646
196	1	5.67	5.1302	3.5305	1.5997	0.4557	0.8622	0.0632	0.8057	3.1376	0.1782	0.3637
197	1	5.67	5.095	3.4761	1.6189	0.4331	0.9162	0.0472	0.8451	3.1635	0.1818	0.3615
198	1	5.67	5.062	3.4181	1.6439	0.4076	0.9696	0.0328	0.8838	3.1785	0.1851	0.3577
199	1	5.67	5.0326	3.3582	1.6744	0.3796	1.0212	0.0206	0.9211	3.1814	0.188	0.3524
200	1	5.67	5.0066	3.2953	1.7113	0.3494	1.0699	0.011	0.9565	3.1714	0.1905	0.3455
201	1	5.67	4.9849	3.2305	1.7544	0.3178	1.1146	0.0042	0.9891	3.1478	0.1925	0.337
202	1	5.67	4.9674	3.1636	1.8038	0.2854	1.1544	0.0006	1.0185	3.1104	0.1939	0.327
203	1	5.67	4.9543	3.095	1.8594	0.2529	1.1885	0.0002	1.044	3.0593	0.1949	0.3156
204	1	5.67	4.9447	3.0238	1.9209	0.2211	1.2163	0.003	1.0654	2.9953	0.1953	0.3031
205	1	5.67	4.938	2.9503	1.9877	0.1907	1.2376	0.0087	1.0821	2.9192	0.1951	0.2897
206	1	5.67	4.9333	2.8739	2.0594	0.1623	1.2522	0.017	1.0942	2.8325	0.1945	0.2755
207	1	5.67	4.9293	2.7946	2.1348	0.1362	1.2605	0.0276	1.1015	2.7369	0.1933	0.261
208	1	5.67	4.9233	2.7111	2.2123	0.1128	1.2628	0.04	1.1043	2.6344	0.1918	0.2463
209	1	5.67	4.913	2.6233	2.2897	0.0922	1.2598	0.0539	1.1026	2.5269	0.1898	0.2316
210	1	5.67	4.8948	2.5303	2.3645	0.0742	1.2521	0.0688	1.0972	2.4167	0.1875	0.2173
211	1	5.67	4.8643	2.4315	2.4327	0.0589	1.2405	0.0843	1.0881	2.3057	0.1849	0.2034
212	1	5.67	4.8148	2.3256	2.4893	0.046	1.2257	0.1002	1.0763	2.1957	0.1821	0.1901
213	1	5.67	4.7388	2.2113	2.5275	0.0353	1.2085	0.1161	1.0621	2.0883	0.1791	0.1775
214	1	5.67	4.6254	2.0875	2.5378	0.0266	1.1895	0.132	1.0461	1.9847	0.176	0.1657
215	1	5.67	4.7767	4.0812	0.6956	4.3169	1.2757	1.4574	1.1355	0.6672	0.1266	0.2178
216	1	5.67	5.5048	4.5642	0.9406	4.6673	1.3497	1.8988	1.2389	0.7832	0.072	0.2951
217	1	5.67	6.1689	4.9343	1.2346	4.8037	1.3733	2.3239	1.3212	0.8769	0.0303	0.3777
218	1	5.67	6.7223	5.1652	1.5571	4.7472	1.3475	2.6991	1.3768	0.9335	0.0059	0.4594
219	1	5.67	7.106	5.233	1.8729	4.465	1.2797	3.0106	1.4035	0.9426	0.0005	0.5351
220	1	5.67	12.8199	9.5732	3.2467	4.6947	1.6338	3.0534	1.6017	0.976	0.0007	0.582
221	1	5.67	13.1362	9.7981	3.3381	4.6849	1.8887	2.9048	1.7381	0.9494	0.0009	0.5857
222	1	5.67	11.8151	8.2448	3.5703	0.0471	1.951	0.0063	1.8004	0.9099	1.4904	0.5568
223	1	5.67	12.2485	8.6135	3.635	0.0729	1.8926	0.0124	1.803	0.9634	1.7006	0.5468
224	1	5.67	12.5482	8.8849	3.6633	0.106	1.8117	0.0212	1.7841	1.0108	1.9236	0.5282
225	1	5.67	12.7379	9.0673	3.6707	0.1464	1.7085	0.0329	1.7404	1.048	2.1529	0.5
226	1	5.67	12.8291	9.1633	3.6658	0.1933	1.5844	0.0473	1.67	1.0708	2.381	0.4617
227	1	5.67	12.8269	9.1725	3.6544	0.2456	1.442	0.0639	1.5728	1.0758	2.5998	0.4141
228	1	5.67	12.7322	9.0936	3.6385	0.3013	1.2859	0.0819	1.4511	1.0611	2.8017	0.3593
229	1	5.67	12.5421	8.9268	3.6154	0.3584	1.1219	0.1002	1.31	1.0266	2.9799	0.3009
230	1	5.67	12.25	8.6708	3.5792	0.4148	0.9571	0.1178	1.1568	0.9745	3.1287	0.2431
231	1	5.67	11.842	8.3234	3.5187	0.4689	0.799	0.1337	1.0006	0.9091	3.2439	0.1898
232	1	5.67	6.6399	5.3218	1.3181	0.5148	0.6687	0.148	0.8675	0.8454	3.3259	0.1476
233	1	5.67	6.7894	5.4727	1.3168	0.5194	0.6824	0.1674	0.8926	0.8647	3.4259	0.1429
234	1	5.67	6.8972	5.5946	1.3026	0.5238	0.6966	0.1895	0.9192	0.8849	3.5324	0.1378
235	1	5.67	6.9719	5.6929	1.2791	0.5279	0.7112	0.2148	0.9469	0.9059	3.645	0.1322
236	1	5.67	7.0209	5.7719	1.249	0.5315	0.7261	0.2434	0.9759	0.9275	3.7631	0.1262
237	1	5.67	7.0494	5.8346	1.2148	0.5344	0.741	0.2759	1.0059	0.9495	3.8858	0.1197
238	1	5.67	7.0627	5.8844	1.1783	0.5365	0.7557	0.3124	1.0368	0.9718	4.0118	0.1126
239	1	5.67	7.0642	5.9236	1.1406	0.5373	0.77	0.3534	1.0682	0.9939	4.1392	0.1052
240	1	5.67	7.0579	5.9546	1.1033	0.5368	0.7834	0.3988	1.1001	1.0155	4.2657	0.0972
241	1	5.67	7.0457	5.9792	1.0664	0.5344	0.7955	0.4489	1.1318	1.0363	4.3884	0.0889
242	1	5.67	7.0303	5.9991	1.0311	0.53	0.806	0.5034	1.1633	1.0557	4.5042	0.0803
243	1	5.67	7.0133	6.0154	0.9979	0.5233	0.8142	0.5621	1.1938	1.0732	4.6097	0.0714
244	1	5.67	6.9963	6.0294	0.9669	0.5138	0.8198	0.6243	1.2233	1.0884	4.7014	0.0624
245	1	5.67	6.9799	6.0413	0.9386	0.5015	0.8222	0.6894	1.2509	1.1007	4.7761	0.0535
246	1	5.67	6.9659	6.0526	0.9133	0.4861	0.8211	0.7564	1.2766	1.1096	4.8308	0.0448
247	1	5.67	6.9543	6.0635	0.8909	0.4677	0.8161	0.8242	1.2995	1.1147	4.8631	0.0365
248	1	5.67	6.9462	6.0745	0.8717	0.4463	0.807	0.8919	1.3196	1.1157	4.8712	0.0287
249	1	5.67	6.941	6.0853	0.8557	0.4221	0.7937	0.9581	1.3362	1.1123	4.8539	0.0216
250	1	5.67	6.9391	6.0959	0.8431	0.3956	0.7763	1.0221	1.3491	1.1046	4.8106	0.0154
251	1	5.67	6.9404	6.1066	0.8339	0.3672	0.755	1.0828	1.358	1.0925	4.7416	0.0101
252	1	5.67	6.944	6.1162	0.8278	0.3375	0.7302	1.1394	1.3629	1.0764	4.6478	0.006
253	1	5.67	6.9497	6.1249	0.8248	0.3073	0.7024	1.1915	1.3635	1.0565	4.5308	0.0029
254	1	5.67	6.9565	6.1316	0.825	0.2772	0.6722	1.2385	1.36	1.0332	4.3931	0.001
255	1	5.67	6.963	6.135	0.828	0.2478	0.6403	1.2802	1.3522	1.0071	4.2379	0.0001
256	1	5.67	6.9675	6.1338	0.8337	0.2198	0.6073	1.3166	1.3405	0.9788	4.069	0.0002
257	1	5.67	6.9681	6.1265	0.8417	0.1935	0.5739	1.3476	1.325	0.9487	3.8903	0.0012
258	1	5.67	6.9626	6.1111	0.8516	0.1692	0.5406	1.3736	1.3062	0.9175	3.7061	0.003
259	1	5.67	6.9478	6.0852	0.8625	0.1471	0.5079	1.3946	1.2843	0.8857	3.5204	0.0054
260	1	5.67	6.9198	6.0458	0.874	0.1273	0.4764	1.4112	1.26	0.8536	3.3367	0.0084
261	1	5.67	6.8743	5.9891	0.8851	0.1097	0.4462	1.4236	1.2335	0.8218	3.158	0.0118
262	1	5.67	6.8057	5.9116	0.894	0.0941	0.4175	1.4324	1.2055	0.7905	2.9863	0.0155
263	1	5.67	6.7073	5.8075	0.8998	0.0805	0.3906	1.4379	1.1763	0.76	2.8233	0.0194
264	1	5.67	6.5704	5.6705	0.8999	0.0686	0.3654	1.4406	1.1466	0.7306	2.67	0.0235
265	1	5.67	6.3848	5.4929	0.8918	0.0584	0.3421	1.441	1.1166	0.7024	2.5267	0.0276
266	1	5.67	4.6268	4.123	0.5038	0.0482	0.3156	1.4232	1.0839	0.6774	0.8843	0.0356
267	1	5.67	4.4692	3.9354	0.5338	0.0379	0.2861	1.3941	1.0465	0.6503	0.8884	0.0472
268	1	5.67	4.2787	3.7159	0.5627	0.0282	0.2554	1.3594	1.0047	0.6195	0.8901	0.0615
269	1	5.67	4.0638	3.4724	0.5914	0.0193	0.2238	1.3188	0.9585	0.585	0.8889	0.0788
270	1	5.67	3.8325	3.2118	0.6207	0.0117	0.1917	1.2717	0.9076	0.5468	0.8842	0.0994
271	1	5.67	3.5912	2.9407	0.6505	0.0057	0.1597	1.2178	0.8523	0.5052	0.8755	0.1235
272	1	5.67	3.3458	2.6643	0.6815	0.0017	0.1285	1.157	0.7927	0.4606	0.8625	0.1511
273	1	5.67	3.1012	2.3877	0.7135	0	0.0989	1.0894	0.7295	0.4138	0.8447	0.182
274	1	5.67	2.8618	2.1147	0.7471	0.0009	0.0717	1.0156	0.6633	0.3656	0.822	0.2161
275	1	5.67	2.6317	1.8495	0.7822	0.0048	0.0479	0.9362	0.5951	0.3169	0.7944	0.2526
276	1	5.67	2.4136	1.5947	0.8188	0.0118	0.0282	0.8526	0.5259	0.2689	0.7621	0.2908
277	1	5.67	2.2106	1.3539	0.8567	0.0219	0.0134	0.7662	0.4574	0.2227	0.7257	0.3298
278	1	5.67	2.0247	1.129	0.8956	0.035	0.0039	0.6789	0.3906	0.1794	0.6857	0.3685
279	1	5.67	1.8577	0.9227	0.9349	0.0508	0.0001	0.5926	0.3271	0.14	0.643	0.4062
280	1	5.67	1.7101	0.7358	0.9742	0.0691	0.0017	0.5094	0.2681	0.1051	0.5985	0.4418
281	1	5.67	1.5826	0.5698	1.0128	0.0892	0.0085	0.431	0.2147	0.0753	0.5531	0.4748
282	1	5.67	1.4752	0.4261	1.0491	0.1109	0.0198	0.3588	0.1673	0.0509	0.5078	0.5047
283	1	5.67	1.3859	0.3037	1.0822	0.1335	0.0351	0.2938	0.1266	0.0317	0.4635	0.5311
284	1	5.67	1.3132	0.2039	1.1094	0.1566	0.0536	0.2365	0.0924	0.0174	0.4209	0.554
285	1	5.67	1.2539	0.1252	1.1287	0.1797	0.0745	0.187	0.0646	0.0078	0.3805	0.5733
286	1	5.67	1.2035	0.0669	1.1366	0.2026	0.097	0.1451	0.0425	0.0022	0.3428	0.5894
287	1	5.67	1.199	0.0526	1.1464	0.1904	0.0979	0.1294	0.0303	0.0005	0.3439	0.6094
288	1	5.67	1.2703	0.0892	1.181	0.1299	0.0667	0.1454	0.0259	0.0002	0.4043	0.6378
289	1	5.67	1.3647	0.1376	1.2272	0.0773	0.0397	0.1621	0.0215	0.0001	0.4706	0.6642
290	1	5.67	1.4863	0.1987	1.2876	0.0361	0.0186	0.1793	0.0172	0	0.542	0.6876
291	1	5.67	1.6368	0.2727	1.3641	0.0095	0.005	0.1963	0.0131	0.0001	0.6174	0.7072
292	1	5.67	1.8163	0.3585	1.4578	0	0	0.2126	0.0094	0.0002	0.6955	0.7221
293	1	5.67	2.0222	0.4547	1.5675	0.009	0.0043	0.2276	0.0062	0.0004	0.7749	0.7317
294	1	5.67	2.2499	0.5591	1.6908	0.0361	0.0179	0.2409	0.0037	0.0007	0.854	0.7357
295	1	5.67	2.4917	0.6685	1.8232	0.0797	0.0399	0.252	0.0018	0.0011	0.9316	0.7343
296	1	5.67	2.7363	0.7784	1.9579	0.1369	0.069	0.2608	0.0006	0.0015	1.0064	0.7276
297	1	5.67	2.8025	0.8059	1.9966	0.1759	0.083	0.2513	0.0007	0.0028	0.996	0.7222
298	1	5.67	2.5747	0.702	1.8727	0.173	0.0672	0.2156	0.0026	0.0066	0.8522	0.7183
299	1	5.67	2.3121	0.5874	1.7247	0.1677	0.0515	0.1783	0.0065	0.0123	0.6971	0.7041
300	1	5.67	2.0355	0.4691	1.5664	0.1597	0.0368	0.1407	0.0122	0.02	0.5366	0.6784
301	1	5.67	1.7631	0.3535	1.4095	0.149	0.0237	0.1046	0.02	0.0297	0.3796	0.6411
302	1	5.67	1.5098	0.2477	1.2621	0.1358	0.0131	0.0718	0.0295	0.0412	0.2379	0.5928
303	1	5.67	1.2876	0.1567	1.1309	0.1208	0.0054	0.0441	0.0407	0.0543	0.1238	0.5356
304	1	5.67	1.1045	0.0857	1.0188	0.1048	0.0011	0.0228	0.0528	0.0684	0.0459	0.4724
305	1	5.67	0.9634	0.036	0.9274	0.0887	0.0001	0.0086	0.0656	0.083	0.0066	0.407
306	1	5.67	0.8623	0.0083	0.854	0.0734	0.0021	0.0013	0.0781	0.0975	0.0019	0.3432
307	1	5.67	0.8341	0.0007	0.8334	0.0656	0.0051	0	0.0817	0.1089	0.0116	0.3219
308	1	5.67	0.85	0	0.8501	0.0643	0.0074	0.0001	0.0763	0.1182	0.0147	0.3408
309	1	5.67	0.8629	0.0013	0.8616	0.0627	0.0104	0.0006	0.0707	0.1284	0.0184	0.3615
310	1	5.67	0.8744	0.0052	0.8691	0.0611	0.0141	0.0016	0.0649	0.1399	0.0229	0.3841
311	1	5.67	0.8857	0.0118	0.8739	0.0593	0.0188	0.0032	0.059	0.1524	0.0281	0.4087
312	1	5.67	0.8987	0.0219	0.8768	0.0573	0.0245	0.0055	0.0529	0.1663	0.0342	0.4355
313	1	5.67	0.9138	0.0356	0.8782	0.0552	0.0314	0.0086	0.0468	0.1815	0.0414	0.4646
314	1	5.67	0.932	0.0531	0.8789	0.0529	0.0397	0.0126	0.0406	0.1984	0.0496	0.496
315	1	5.67	0.9537	0.0748	0.8789	0.0505	0.0496	0.0177	0.0345	0.2167	0.0591	0.5298
316	1	5.67	0.9801	0.1012	0.8789	0.0478	0.0612	0.024	0.0286	0.2368	0.0699	0.5661
317	1	5.67	1.0112	0.132	0.8793	0.045	0.0749	0.0316	0.0229	0.2585	0.0822	0.6047
318	1	5.67	1.0477	0.1677	0.88	0.042	0.0908	0.0407	0.0176	0.282	0.0959	0.6456
319	1	5.67	1.0902	0.209	0.8812	0.0389	0.1089	0.0513	0.0127	0.3073	0.1114	0.6887
320	1	5.67	1.139	0.2555	0.8835	0.0356	0.1296	0.0637	0	0.3345	0.1284	0.7337
321	1	5.67	1.1942	0.3074	0.8868	0.0323	0.1528	0.0779	0.0049	0.3632	0.1472	0.7802
322	1	5.67	1.2563	0.3654	0.891	0.0289	0.1787	0.0939	0.0023	0.3936	0.1677	0.8279
323	1	5.67	1.3257	0.4296	0.8961	0.0254	0.2071	0.1118	0.0006	0.4253	0.1898	0.8764
324	1	5.67	1.4025	0.4996	0.9028	0.022	0.2379	0.1316	0.0001	0.4583	0.2135	0.9249
325	1	5.67	1.4869	0.5765	0.9104	0.0186	0.2709	0.1532	0.0008	0.492	0.2386	0.9731
326	1	5.67	1.5796	0.66	0.9196	0.0154	0.3057	0.1765	0.0027	0.5262	0.2649	1.0202
327	1	5.67	1.6801	0.75	0.9301	0.0124	0.3418	0.2014	0.0061	0.5605	0.2923	1.0657
328	1	5.67	1.7886	0.8468	0.9418	0.0096	0.3788	0.2275	0.0107	0.5945	0.3204	1.109
329	1	5.67	1.9055	0.9504	0.9551	0.0072	0.4161	0.2546	0.0167	0.6277	0.3491	1.1496
330	1	5.67	2.0308	1.0612	0.9696	0.005	0.453	0.2825	0.024	0.6598	0.3779	1.1869
331	1	5.67	2.1638	1.1785	0.9854	0.0033	0.4891	0.3107	0.0324	0.6902	0.4066	1.2207
332	1	5.67	2.3048	1.3021	1.0027	0.0019	0.5237	0.339	0.0419	0.7188	0.435	1.2506
333	1	5.67	2.4532	1.4324	1.0209	0.0009	0.5565	0.367	0.0523	0.7451	0.4627	1.2764
334	1	5.67	2.6088	1.5684	1.0404	0.0003	0.5869	0.3944	0.0634	0.7693	0.4896	1.298
335	1	5.67	2.7706	1.7096	1.061	0	0.6149	0.421	0.0751	0.7909	0.5155	1.3153
336	1	5.67	2.9375	1.8551	1.0824	0.0001	0.6402	0.4465	0.0873	0.8101	0.5401	1.3284
337	1	5.67	3.1088	2.0046	1.1041	0.0004	0.6626	0.4707	0.0997	0.8269	0.5634	1.3375
338	1	5.67	3.2822	2.1561	1.1261	0.0011	0.6824	0.4935	0.1122	0.8414	0.5854	1.3426
339	1	5.67	3.4567	2.3088	1.1478	0.0019	0.6994	0.5149	0.1247	0.8537	0.6059	1.3442
340	1	5.67	3.6296	2.4606	1.1691	0.0029	0.7139	0.5348	0.137	0.864	0.625	1.3424
341	1	5.67	3.7981	2.6095	1.1886	0.0041	0.726	0.5531	0.1491	0.8724	0.6426	1.3376
342	1	5.67	3.959	2.7535	1.2054	0.0053	0.736	0.5699	0.1609	0.8792	0.6589	1.3303
343	1	5.67	4.1082	2.889	1.2191	0.0066	0.744	0.5853	0.1723	0.8845	0.6738	1.3206
344	1	5.67	4.2405	3.0129	1.2275	0.008	0.7504	0.5993	0.1833	0.8885	0.6874	1.3092
345	1	5.67	4.3505	3.1215	1.229	0.0094	0.7552	0.612	0.1938	0.8914	0.6999	1.2962
346	1	5.67	4.4314	3.2101	1.2213	0.0108	0.7588	0.6236	0.2037	0.8934	0.7112	1.2821
347	1	5.67	4.4755	3.2739	1.2015	0.0122	0.7613	0.6339	0.2132	0.8944	0.7214	1.2672
348	1	5.67	4.674	3.4785	1.1954	0.0083	0.8054	0.7054	0.2605	0.9507	0.7352	1.2492
349	1	5.67	4.8704	3.6864	1.184	0.0045	0.8548	0.7911	0.3204	1.0142	0.7475	1.2229
350	1	5.67	5.0482	3.8799	1.1683	0.0017	0.9032	0.884	0.3897	1.0771	0.757	1.1872
351	1	5.67	5.2113	4.0586	1.1527	0.0002	0.9486	0.9827	0.4681	1.137	0.7627	1.1411
352	1	5.67	5.3625	4.2229	1.1396	0.0003	0.9888	1.0854	0.5549	1.1916	0.7639	1.0841
353	1	5.67	5.5033	4.3712	1.1321	0.0023	1.0217	1.1896	0.6485	1.2389	0.7597	1.0162
354	1	5.67	5.6345	4.5029	1.1316	0.0065	1.0454	1.2924	0.747	1.2769	0.7495	0.9383
355	1	5.67	5.756	4.6167	1.1393	0.0128	1.0589	1.3906	0.8478	1.3045	0.733	0.8522
356	1	5.67	5.8673	4.7113	1.156	0.021	1.0617	1.4813	0.9483	1.321	0.7102	0.7604
357	1	5.67	5.9657	4.7844	1.1813	0.0309	1.0538	1.5617	1.0457	1.3263	0.6816	0.666
358	1	5.67	6.048	4.8334	1.2146	0.0421	1.0361	1.6299	1.1378	1.3207	0.648	0.5725
359	1	5.67	6.109	4.855	1.254	0.0541	1.0098	1.6844	1.2225	1.3054	0.6105	0.483
360	1	5.67	6.1416	4.845	1.2966	0.0663	0.9766	1.725	1.2986	1.2815	0.5704	0.4001
361	1	5.67	6.1364	4.7987	1.3376	0.0785	0.9383	1.7519	1.3651	1.2506	0.5292	0.3257
362	1	5.67	6.0801	4.7094	1.3707	0.0902	0.8966	1.7662	1.422	1.2144	0.4881	0.2606
363	1	5.67	5.9867	4.5811	1.4056	0.1084	0.8674	1.7577	1.4627	1.1641	0.4664	0.2236
364	1	5.67	5.828	4.3862	1.4418	0.1368	0.8414	1.7192	1.485	1.0938	0.4597	0.2047
365	1	5.67	5.5822	4.1173	1.4648	0.1691	0.7989	1.6573	1.4914	1.0114	0.447	0.182
366	1	5.67	5.2654	3.7872	1.4781	0.2047	0.7382	1.5702	1.4781	0.9176	0.428	0.156
367	1	5.67	4.894	3.4109	1.4832	0.2424	0.6602	1.4583	1.442	0.8141	0.4026	0.1279
368	1	5.67	4.483	3.0022	1.4808	0.2809	0.5681	1.3243	1.3813	0.7042	0.3716	0.0994
369	1	5.67	4.0474	2.5765	1.4708	0.3189	0.4683	1.1737	1.2963	0.5919	0.3362	0.0724
370	1	5.67	3.6002	2.1483	1.4519	0.3548	0.3692	1.0145	1.1893	0.4823	0.2983	0.0488
371	1	5.67	3.1532	1.7318	1.4214	0.3876	0.2784	0.8558	1.0663	0.3804	0.2597	0.0299
372	1	5.67	2.7136	1.339	1.3746	0.4165	0.2014	0.7061	0.9357	0.2901	0.2223	0.0161
	2	5.67	0.4938	0.0012	0.4926	0.3374	0.1902	0.0328	0.0327	0.0056	0.0012	0.0846
	2	5.67	0.5306	0.0066	0.524	0.3209	0.231	0.0164	0.0602	0.0139	0.0002	0.0722
	2	5.67	0.594	0.0419	0.5521	0.3018	0.2785	0.0048	0.0991	0.0268	0.0036	0.0596
	2	5.67	0.6904	0.1125	0.5779	0.2803	0.3326	0.0001	0.151	0.045	0.0127	0.0473
	2	5.67	0.825	0.2231	0.6018	0.2564	0.3927	0.0047	0.217	0.0692	0.0286	0.0355
	2	5.67	1.0009	0.3766	0.6243	0.2304	0.457	0.021	0.2972	0.0995	0.0521	0.0248
	2	5.67	1.2192	0.5734	0.6459	0.2029	0.5235	0.0504	0.3905	0.1357	0.0835	0.0156
	2	5.67	1.479	0.8127	0.6663	0.1745	0.589	0.0931	0.4944	0.1772	0.1221	0.0083
	2	5.67	1.7758	1.0906	0.6852	0.1461	0.6504	0.1474	0.6056	0.223	0.1669	0.0031
	2	5.67	2.1028	1.4005	0.7023	0.1187	0.7047	0.2103	0.7203	0.2717	0.2157	0.0004
	2	5.67	2.4492	1.7325	0.7167	0.0933	0.7495	0.2781	0.8348	0.3216	0.2664	0.0002
	2	5.67	2.8015	2.0743	0.7272	0.0706	0.7831	0.3472	0.9456	0.3713	0.3166	0.0024
	2	5.67	3.1427	2.4108	0.7319	0.0511	0.8053	0.4147	1.0503	0.4194	0.3645	0.0067
	2	5.67	3.4528	2.7245	0.7283	0.0351	0.8165	0.4783	1.1467	0.4648	0.4085	0.0129
	2	5.67	3.6477	2.9281	0.7196	0.0249	0.8158	0.5222	1.2154	0.4972	0.4371	0.018
	2	5.67	3.5568	2.8279	0.7289	0.0257	0.8012	0.505	1.2046	0.4885	0.4207	0.0137
	2	5.67	3.4355	2.7031	0.7324	0.0266	0.7848	0.4861	1.1909	0.4785	0.4028	0.0097
	2	5.67	3.2915	2.5596	0.7319	0.0275	0.7663	0.4655	1.1738	0.4669	0.3833	0.0061
	2	5.67	3.1312	2.4023	0.7289	0.0284	0.7457	0.4431	1.1529	0.4537	0.3622	0.0032
	2	5.67	2.9598	2.2358	0.724	0.0294	0.7228	0.419	1.1279	0.4388	0.3395	0.0011
	2	5.67	2.7819	2.0638	0.718	0.0303	0.6976	0.3932	1.0984	0.422	0.3151	0.0001
	2	5.67	2.6008	1.8894	0.7114	0.0312	0.6699	0.3657	1.0643	0.4032	0.2893	0.0003
	2	5.67	2.42	1.7148	0.7052	0.0321	0.6398	0.3369	1.0254	0.3824	0.2621	0.0019
	2	5.67	2.2416	1.5426	0.699	0.033	0.6074	0.307	0.9819	0.3598	0.234	0.0052
	2	5.67	2.068	1.3744	0.6936	0.0337	0.5729	0.2763	0.9339	0.3353	0.2052	0.0103
	2	5.67	1.9008	1.2119	0.6888	0.0344	0.5365	0.2452	0.8819	0.3092	0.1763	0.0174
	2	5.67	1.7417	1.0569	0.6848	0.0349	0.4985	0.2142	0.8262	0.2819	0.1478	0.0265
	2	5.67	1.5919	0.9098	0.6821	0.0353	0.4594	0.1839	0.7677	0.2538	0.1204	0.0376
	2	5.67	1.4523	0.7721	0.6802	0.0355	0.4197	0.1547	0.7071	0.2252	0.0946	0.0507
	2	5.67	1.3236	0.6443	0.6793	0.0356	0.38	0.1271	0.6454	0.1969	0.0712	0.0656
	2	5.67	1.2068	0.5273	0.6794	0.0355	0.3407	0.1017	0.5836	0.1693	0.0507	0.0821
	2	5.67	1.1022	0.4216	0.6805	0.0352	0.3024	0.0789	0.5227	0.143	0.0335	0.1
	2	5.67	1.0099	0.3275	0.6824	0.0347	0.2657	0.0588	0.4636	0.1185	0.0199	0.1188
	2	5.67	0.9302	0.2455	0.6847	0.0341	0.2311	0.0418	0.4071	0.0962	0.0099	0.1384
	2	5.67	0.8629	0.1754	0.6875	0.0334	0.1988	0.0278	0.354	0.0764	0.0035	0.1582
	2	5.67	0.8081	0.1178	0.6903	0.0326	0.1691	0.0169	0.3049	0.0591	0.0004	0.178
	2	5.67	0.7645	0.0717	0.6929	0.0317	0.1421	0.0089	0.26	0.0443	0.0002	0.1975
	2	5.67	0.7322	0.0378	0.6943	0.0308	0.1181	0.0036	0.2195	0.0321	0.0027	0.2165
	2	5.67	0.7094	0.015	0.6943	0.0298	0.0968	0.0007	0.1835	0.0223	0.0072	0.2346
	2	5.67	0.6948	0.0027	0.6921	0.0288	0.0782	0	0.1518	0.0146	0.0135	0.2519
	2	5.67	0.6866	0.0001	0.6865	0.0277	0.0623	0.0011	0.1243	0.0088	0.0212	0.2682
	2	5.67	0.6827	0.0067	0.676	0.0267	0.0487	0.0038	0.1005	0.0047	0.0299	0.2833
	2	5.67	0.6814	0.0187	0.6627	0.0262	0.0387	0.0075	0.0826	0.0022	0.0388	0.2958
	2	5.67	0.6925	0.0217	0.6708	0.0298	0.0416	0.0104	0.0857	0.0023	0.0428	0.2938
	2	5.67	0.698	0.0254	0.6726	0.0338	0.0448	0.0141	0.089	0.0024	0.0471	0.291
	2	5.67	0.6992	0.0293	0.6699	0.0384	0.0483	0.0186	0.0923	0.0024	0.052	0.2872
	2	5.67	0.6978	0.0336	0.6642	0.0435	0.052	0.0241	0.0957	0.0025	0.0572	0.2822
	2	5.67	0.6945	0.038	0.6565	0.0491	0.056	0.0306	0.0991	0.0025	0.063	0.2759
	2	5.67	0.6906	0.0428	0.6477	0.0554	0.0602	0.0382	0.1025	0.0026	0.0692	0.268
	2	5.67	0.6868	0.0482	0.6385	0.0622	0.0646	0.047	0.1056	0.0027	0.0758	0.2583
	2	5.67	0.6832	0.0535	0.6298	0.0696	0.069	0.0571	0.1085	0.0027	0.0828	0.2468
	2	5.67	0.6808	0.0588	0.6219	0.0773	0.0735	0.0683	0.1109	0.0028	0.09	0.2333
	2	5.67	0.6798	0.0648	0.615	0.0854	0.0779	0.0808	0.1129	0.0028	0.0974	0.2178
	2	5.67	0.6804	0.0708	0.6096	0.0936	0.0821	0.0943	0.1142	0.0028	0.1047	0.2006
	2	5.67	0.6829	0.0769	0.606	0.1018	0.086	0.1087	0.1148	0.0028	0.1119	0.1818
	2	5.67	0.6875	0.0833	0.6042	0.1098	0.0894	0.1238	0.1146	0.0027	0.1188	0.1619
	2	5.67	0.6943	0.0898	0.6045	0.1175	0.0923	0.1393	0.1137	0.0027	0.1253	0.1414
	2	5.67	0.7031	0.0964	0.6067	0.1245	0.0947	0.155	0.1119	0.0025	0.1311	0.121
	2	5.67	0.7139	0.1029	0.611	0.1309	0.0965	0.1706	0.1094	0.0024	0.1363	0.1013
	2	5.67	0.7266	0.1099	0.6167	0.1364	0.0976	0.1858	0.1062	0.0023	0.1406	0.083
	2	5.67	0.7405	0.1166	0.6239	0.1411	0.0981	0.2005	0.1025	0.0022	0.1442	0.0664
	2	5.67	0.7555	0.1233	0.6322	0.1448	0.0981	0.2144	0.0984	0.002	0.1469	0.0518
	2	5.67	0.7705	0.1298	0.6407	0.1477	0.0976	0.2274	0.094	0.0019	0.1488	0.0394
	2	5.67	0.7852	0.1362	0.6489	0.1498	0.0967	0.2393	0.0894	0.0018	0.15	0.0291
	2	5.67	0.7975	0.142	0.6555	0.1512	0.0955	0.2503	0.0848	0.0016	0.1506	0.0208
	2	5.67	0.8062	0.1472	0.6589	0.1518	0.094	0.2601	0.0803	0.0015	0.1506	0.0143
	2	5.67	0.809	0.1516	0.6573	0.152	0.0923	0.2689	0.0759	0.0014	0.15	0.0093
	2	5.67	0.8148	0.1547	0.6602	0.1547	0.0932	0.2774	0.0742	0.0012	0.1477	0.0066
	2	5.67	0.8602	0.156	0.7042	0.1705	0.1059	0.2881	0.0835	0.0006	0.1389	0.009
	2	5.67	0.9027	0.1558	0.7469	0.188	0.1203	0.2988	0.0939	0.0002	0.1292	0.0119
	2	5.67	0.9442	0.1541	0.7902	0.2072	0.1365	0.3094	0.1054	0	0.1186	0.0155
	2	5.67	0.9858	0.1512	0.8346	0.228	0.1546	0.3194	0.1181	0.0001	0.1073	0.0199
	2	5.67	1.0289	0.1475	0.8815	0.2503	0.1744	0.3283	0.132	0.0006	0.0953	0.0251
	2	5.67	1.0743	0.1431	0.9313	0.2737	0.1958	0.3357	0.1468	0.0015	0.0828	0.0311
	2	5.67	1.1228	0.1383	0.9845	0.2979	0.2186	0.341	0.1625	0.003	0.0701	0.038
	2	5.67	1.1748	0.1328	1.042	0.3224	0.2422	0.3438	0.1788	0.005	0.0574	0.0457
	2	5.67	1.2306	0.1271	1.1035	0.3466	0.266	0.3438	0.1953	0.0075	0.0451	0.054
	2	5.67	1.2904	0.1207	1.1697	0.3697	0.2893	0.3408	0.2117	0.0106	0.0336	0.0628
	2	5.67	1.3542	0.1143	1.24	0.3911	0.3114	0.3348	0.2274	0.0142	0.0234	0.0718
	2	5.67	1.4218	0.1078	1.314	0.4102	0.3316	0.3259	0.2421	0.0182	0.0148	0.0808
	2	5.67	1.4922	0.1011	1.3911	0.4264	0.3491	0.3146	0.2554	0.0226	0.0081	0.0896
	2	5.67	1.5648	0.0942	1.4706	0.4393	0.3635	0.3011	0.2669	0.0271	0.0034	0.0979
	2	5.67	1.6383	0.0874	1.5509	0.4488	0.3746	0.2861	0.2763	0.0316	0.0008	0.1055
	2	5.67	1.7104	0.0807	1.6298	0.4549	0.3824	0.2701	0.2836	0.0361	0.0001	0.1122
	2	5.67	1.7787	0.0741	1.7046	0.4577	0.3869	0.2535	0.2888	0.0404	0.0012	0.1181
	2	5.67	1.8394	0.0675	1.7719	0.4575	0.3886	0.2369	0.2919	0.0444	0.0037	0.1231
	2	5.67	1.8877	0.0612	1.8265	0.4548	0.3878	0.2205	0.2931	0.0481	0.0074	0.1273
	2	5.67	1.9175	0.0554	1.8621	0.4499	0.3849	0.2048	0.2928	0.0515	0.012	0.1306
	2	5.67	1.9198	0.0498	1.87	0.4434	0.3805	0.1898	0.2912	0.0546	0.0172	0.1332
	2	5.67	2.0497	0.0631	1.9866	0.5009	0.3838	0.1745	0.3032	0.0609	0.0121	0.2053
	2	5.67	2.1835	0.0793	2.1041	0.5629	0.3847	0.1578	0.3145	0.0679	0.0075	0.3008
	2	5.67	2.326	0.0984	2.2277	0.6279	0.3824	0.1396	0.3236	0.0751	0.0038	0.4222
	2	5.67	2.4807	0.1202	2.3605	0.6945	0.3766	0.1205	0.3305	0.0825	0.0012	0.5695
	2	5.67	2.6488	0.1445	2.5043	0.7607	0.3668	0.1009	0.3339	0.0899	0.0001	0.7395
	2	5.67	2.8293	0.1704	2.6589	0.8247	0.3528	0.0814	0.3339	0.0969	0.0009	0.9255
	2	5.67	3.0201	0.198	2.8221	0.8848	0.335	0.0629	0.3295	0.1033	0.0037	1.1186
	2	5.67	3.2162	0.2261	2.9901	0.9397	0.3139	0.0461	0.3215	0.1089	0.0083	1.3086
	2	5.67	3.4098	0.2542	3.1556	0.9885	0.2901	0.0316	0.3096	0.1136	0.0146	1.4856
	2	5.67	3.5895	0.2806	3.3088	1.0306	0.2648	0.0197	0.295	0.1171	0.0221	1.6405
	2	5.67	3.739	0.3051	3.434	1.0657	0.239	0.0108	0.2779	0.1195	0.0304	1.7657
	2	5.67	3.8326	0.3243	3.5083	1.094	0.2135	0.0047	0.2599	0.1209	0.039	1.855
	2	5.67	7.8364	0.0034	7.833	1.1722	4.0443	0.0079	0.2658	0.1443	0.0511	1.8784
	2	5.67	8.3193	0.0099	8.3094	1.2928	4.3843	0.022	0.2893	0.1897	0.0682	1.8683
	2	5.67	8.7773	0.0205	8.7568	1.4183	4.7313	0.0449	0.3138	0.2442	0.0891	1.8476
	2	5.67	9.2223	0.0356	9.1866	1.5448	5.0765	0.0777	0.3389	0.3077	0.1137	1.8148
	2	5.67	9.6619	0.0551	9.6068	1.6684	5.4112	0.1212	0.364	0.3798	0.142	1.7689
	2	5.67	10.1005	0.0786	10.0219	1.7848	5.7271	0.1756	0.3882	0.4589	0.1733	1.7094
	2	5.67	10.5402	0.1062	10.434	1.8904	6.0165	0.2405	0.4108	0.543	0.2066	1.6364
	2	5.67	10.9774	0.1361	10.8413	1.9822	6.2726	0.3145	0.431	0.6295	0.2404	1.5511
	2	5.67	11.4077	0.1683	11.2394	2.058	6.4891	0.3956	0.4482	0.7158	0.2735	1.4551
	2	5.67	11.8201	0.2009	11.6191	2.1165	6.6604	0.4817	0.4617	0.7994	0.3044	1.351
	2	5.67	12.1986	0.2334	11.9652	2.1569	6.781	0.5702	0.4713	0.8783	0.3321	1.2417
	2	5.67	12.5184	0.2628	12.2556	2.1797	6.8457	0.6586	0.4768	0.9508	0.3558	1.1304
	2	5.67	12.744	0.2897	12.4543	2.1858	6.8499	0.745	0.4785	1.016	0.3753	1.0203
	2	5.67	12.8185	0.3147	12.5038	2.1767	6.7898	0.8275	0.4766	1.073	0.3907	0.914
	2	5.67	7.3629	6.3268	1.0361	2.254	0.3484	0.9954	0.935	1.1522	0.471	1.0152
	2	5.67	9.0837	8.1825	0.9012	2.3344	0.7781	1.2348	1.4816	1.2332	0.6068	1.2544
	2	5.67	10.8911	10.0538	0.8373	2.3157	1.3576	1.4736	2.1022	1.2787	0.7414	1.4765
	2	5.67	12.6091	11.7388	0.8704	2.1847	1.9918	1.6948	2.7294	1.2718	0.8563	1.6671
	2	5.67	14.042	13.045	0.9969	1.9489	2.6028	1.8857	3.3189	1.1992	0.9356	1.8192
	2	5.67	24.4452	18.4543	5.9908	1.7428	13.1684	1.8447	3.4603	1.0795	0.8937	1.8278
	2	5.67	22.7273	16.8181	5.9092	1.615	12.6001	1.5884	3.1791	0.9536	0.7537	1.7146
	2	5.67	20.7855	15.0469	5.7386	1.4771	11.9121	1.3237	2.8743	0.8198	0.6052	1.5896
	2	5.67	18.6873	13.1833	5.5039	1.331	11.0986	1.0594	2.5492	0.6821	0.4559	1.4545
	2	5.67	16.4934	11.2733	5.2201	1.1794	10.1515	0.8063	2.2098	0.5452	0.315	1.3115
	2	5.67	14.2628	9.3678	4.895	1.0258	9.0641	0.5755	1.8645	0.4153	0.1931	1.1637
	2	5.67	12.0524	7.5206	4.5317	0.8742	7.8429	0.3777	1.5253	0.2981	0.0986	1.015
	2	5.67	9.9141	5.7854	4.1287	0.7289	6.5326	0.2204	1.2057	0.1988	0.0361	0.8696
	2	5.67	7.8898	4.21	3.6798	0.5939	5.2395	0.107	0.9188	0.1201	0.0051	0.7314
	2	5.67	1.7578	0.3295	1.4283	0.5455	0.0788	0.1625	0.0881	0.1169	0.0088	0.6796
	2	5.67	1.739	0.5607	1.1783	0.5039	0.0429	0.2829	0.0193	0.1196	0.0225	0.6211
	2	5.67	1.7593	0.8351	0.9242	0.4497	0.0163	0.4271	0.0006	0.1094	0.04	0.5355
	2	5.67	1.8566	0.9998	0.8568	0.4597	0.006	0.4898	0.0077	0.1233	0.0425	0.5224
	2	5.67	1.9323	1.1199	0.8124	0.478	0.0009	0.5217	0.0169	0.1454	0.0403	0.5092
	2	5.67	1.968	1.217	0.751	0.483	0.0004	0.541	0.0295	0.1669	0.0369	0.4747
	2	5.67	1.9606	1.2839	0.6766	0.4731	0.0046	0.5455	0.0452	0.1867	0.0327	0.4247
	2	5.67	1.9534	1.3092	0.6442	0.4582	0.0077	0.5359	0.0482	0.205	0.0356	0.4087
	2	5.67	1.9584	1.3187	0.6396	0.4452	0.0083	0.5226	0.0415	0.225	0.0451	0.4199
	2	5.67	1.9518	1.3212	0.6306	0.43	0.0089	0.5073	0.0348	0.247	0.0565	0.431
	2	5.67	1.9369	1.3171	0.6198	0.4124	0.0095	0.49	0.0281	0.2708	0.0701	0.4417
	2	5.67	1.9155	1.3075	0.608	0.3922	0.0102	0.4705	0.0216	0.2964	0.0862	0.4514
	2	5.67	1.8895	1.2925	0.597	0.3694	0.0109	0.4487	0.0155	0.3232	0.1049	0.4597
	2	5.67	1.8605	1.2723	0.5881	0.344	0.0116	0.4248	0.01	0.3509	0.1261	0.4661
	2	5.67	1.8298	1.2478	0.582	0.3161	0.0122	0.3988	0.0055	0.3788	0.1498	0.4699
	2	5.67	1.7983	1.2194	0.579	0.2861	0.0129	0.3709	0.0022	0.406	0.1755	0.4705
	2	5.67	1.767	1.1869	0.5801	0.2545	0.0134	0.3416	0.0004	0.4318	0.2027	0.4672
	2	5.67	1.7361	1.1508	0.5853	0.222	0.0139	0.3111	0.0002	0.4554	0.2305	0.4597
	2	5.67	1.7061	1.1112	0.5948	0.1894	0.0142	0.2801	0.0017	0.476	0.2579	0.4476
	2	5.67	1.6772	1.0682	0.609	0.1577	0.0144	0.2491	0.0051	0.4931	0.284	0.431
	2	5.67	1.6494	1.022	0.6274	0.1278	0.0145	0.2186	0.01	0.5064	0.3079	0.4101
	2	5.67	1.6223	0.9727	0.6497	0.1005	0.0144	0.1893	0.0165	0.5156	0.3288	0.3857
	2	5.67	1.5957	0.9207	0.675	0.0764	0.0142	0.1616	0.0242	0.521	0.3463	0.3587
	2	5.67	1.568	0.8655	0.7025	0.0558	0.0139	0.1359	0.0328	0.5227	0.3602	0.3303
	2	5.67	1.5378	0.8073	0.7306	0.0388	0.0136	0.1126	0.042	0.5211	0.3706	0.3015
	2	5.67	1.5034	0.7465	0.757	0.0254	0.0131	0.0918	0.0515	0.5167	0.3776	0.2735
	2	5.67	1.4614	0.683	0.7784	0.0153	0.0127	0.0736	0.061	0.5101	0.3818	0.2468
	2	5.67	1.4081	0.6169	0.7911	0.0081	0.0122	0.0579	0.0704	0.5017	0.3836	0.2221
	2	5.67	1.1368	0.4806	0.6562	0.0021	0.0069	0.0457	0.0649	0.4198	0.3197	0.1537
	2	5.67	0.8196	0.3312	0.4884	0	0.0023	0.0342	0.0546	0.3189	0.2392	0.0827
	2	5.67	0.5365	0.198	0.3385	0.0035	0.0002	0.0235	0.0437	0.2221	0.1631	0.0295
	2	5.67	0.313	0.0938	0.2192	0.0132	0.0008	0.0142	0.0328	0.1361	0.0971	0.0023
	2	5.67	0.1661	0.0267	0.1394	0.0289	0.0045	0.007	0.0227	0.0681	0.0463	0.006
	2	5.67	0.1034	0.0002	0.1031	0.0495	0.011	0.0023	0.0142	0.0228	0.0139	0.0396
	2	5.67	0.1223	0.014	0.1083	0.0733	0.0201	0.0002	0.0077	0.0019	0.0005	0.0971
	2	5.67	0.1766	0.0493	0.1273	0.0822	0.0257	0	0.0085	0.0009	0.0031	0.1456
	2	5.67	0.1891	0.0698	0.1193	0.054	0.0189	0	0.0339	0.0023	0.0121	0.1362
	2	5.67	0.226	0.0918	0.1342	0.0289	0.0124	0.0001	0.0766	0.0043	0.0269	0.1207
	2	5.67	0.2837	0.1117	0.172	0.0108	0.0069	0.0004	0.131	0.0063	0.0459	0.1007
	2	5.67	0.3207	0.1188	0.2019	0.0019	0.0035	0.0007	0.1647	0.0072	0.065	0.0766
	2	5.67	0.2886	0.1033	0.1853	0	0.002	0.0006	0.1406	0.006	0.0829	0.0483
	2	5.67	0.2617	0.0854	0.1763	0.0024	0.0009	0.0005	0.114	0.0048	0.1034	0.0241
	2	5.67	0.2457	0.0663	0.1794	0.0104	0.0002	0.0005	0.0863	0.0035	0.1264	0.007
	2	5.67	0.2449	0.0481	0.1968	0.0242	0.0001	0.0004	0.0596	0.0024	0.151	0
	2	5.67	0.2618	0.0321	0.2297	0.0439	0.0005	0.0003	0.0362	0.0014	0.1764	0.0053
	2	5.67	0.297	0.019	0.278	0.0688	0.0016	0.0002	0.0178	0.0006	0.2016	0.0231
	2	5.67	0.3486	0.0095	0.3391	0.098	0.0032	0.0002	0.0059	0.0002	0.2254	0.0516
	2	5.67	0.4127	0.0033	0.4094	0.1299	0.0053	0.0001	0.0005	0	0.2468	0.0877
	2	5.67	0.4818	0.0006	0.4812	0.1631	0.0078	0.0001	0.001	0	0.2653	0.1279
	2	5.67	0.4796	0.0001	0.4795	0.1635	0.0126	0.0003	0.0022	0	0.2606	0.1324
	2	5.67	0.4576	0.0001	0.4575	0.1546	0.0198	0.0009	0.003	0	0.2496	0.1272
	2	5.67	0.4353	0.0004	0.4349	0.1447	0.0292	0.0019	0.0041	0	0.2375	0.1216
	2	5.67	0.4144	0.0015	0.413	0.1338	0.0412	0.0033	0.0054	0	0.2241	0.1155
	2	5.67	0.3961	0.0028	0.3933	0.1219	0.0559	0.0052	0.0069	0	0.2096	0.1089
	2	5.67	0.3817	0.0051	0.3766	0.1091	0.0735	0.0076	0.0088	0.0002	0.194	0.1018
	2	5.67	0.3716	0.0077	0.3639	0.0958	0.0942	0.0106	0.0108	0.0003	0.1776	0.0944
	2	5.67	0.3668	0.0109	0.356	0.0821	0.1178	0.0142	0.0131	0.0006	0.1604	0.0867
	2	5.67	0.3677	0.0148	0.3529	0.0685	0.1441	0.0182	0.0156	0.0008	0.1428	0.0788
	2	5.67	0.3748	0.0192	0.3556	0.0553	0.1727	0.0229	0.0184	0.0012	0.1251	0.0707
	2	5.67	0.3881	0.024	0.364	0.0429	0.2031	0.028	0.0212	0.0016	0.1077	0.0628
	2	5.67	0.4075	0.0293	0.3782	0.0317	0.2347	0.0334	0.0242	0.002	0.0909	0.055
	2	5.67	0.4333	0.0353	0.3981	0.0221	0.2668	0.0392	0.0272	0.0025	0.075	0.0475
	2	5.67	0.4651	0.0419	0.4232	0.0142	0.2986	0.0451	0.0302	0.003	0.0605	0.0405
	2	5.67	0.5018	0.0487	0.4531	0.0081	0.3297	0.0512	0.0331	0.0035	0.0475	0.0339
	2	5.67	0.5426	0.0557	0.4869	0.0038	0.3594	0.0572	0.0359	0.0041	0.0361	0.028
	2	5.67	0.5863	0.0631	0.5232	0.0012	0.3873	0.0631	0.0386	0.0046	0.0265	0.0226
	2	5.67	0.6305	0.0703	0.5602	0.0001	0.4131	0.0688	0.0411	0.0051	0.0185	0.0179
	2	5.67	0.6724	0.0774	0.595	0.0002	0.4365	0.0742	0.0433	0.0056	0.0122	0.0139
	2	5.67	3.5748	0.428	3.1469	0.0009	0.4542	0.0842	0.0508	0.007	0.0083	2.9519
	2	5.67	3.8132	0.6051	3.2081	0.0022	0.437	0.1467	0.1238	0.0196	0.013	3.1358
	2	5.67	3.9358	0.7849	3.1509	0.0145	0.4122	0.2201	0.2232	0.0378	0.0186	3.12
	3	5.67	1.0461	0.3428	0.7034	0.0123	0.1485	0.0011	0.0022	0.0532	0.1647	0.6986
	3	5.67	1.1653	0.417	0.7483	0.0105	0.2255	0.0024	0.0019	0.0691	0.1926	0.7044
	3	5.67	1.2991	0.4999	0.7992	0.0086	0.3241	0.0042	0.0016	0.0876	0.2233	0.7031
	3	5.67	1.4478	0.5901	0.8577	0.0067	0.444	0.0065	0.0013	0.1086	0.256	0.6935
	3	5.67	1.6102	0.6849	0.9253	0.0048	0.5814	0.0095	0.001	0.1319	0.2903	0.6747
	3	5.67	1.7827	0.7812	1.0015	0.0031	0.7302	0.013	0.0007	0.157	0.3249	0.6465
	3	5.67	1.9604	0.8757	1.0847	0.0017	0.8827	0.0168	0.0005	0.1833	0.3592	0.6097
	3	5.67	2.1365	0.965	1.1715	0.0007	1.0313	0.0209	0.0003	0.2101	0.3918	0.5656
	3	5.67	2.3024	1.0457	1.2567	0.0001	1.1697	0.025	0.0001	0.2366	0.4222	0.5165
	3	5.67	2.4468	1.114	1.3328	0	1.293	0.0288	0	0.262	0.4493	0.4648
	3	5.67	2.5184	1.1481	1.3704	0.0001	1.3578	0.0315	0	0.2756	0.4605	0.4389
	3	5.67	2.4673	1.1228	1.3445	0	1.316	0.032	0	0.2632	0.439	0.4745
	3	5.67	2.3921	1.0864	1.3057	0	1.2651	0.0324	0	0.2477	0.4145	0.5115
	3	5.67	2.2986	1.0396	1.259	0	1.2042	0.0326	0.0001	0.2288	0.3869	0.5488
	3	5.67	2.1917	0.9841	1.2075	0.0001	1.1328	0.0325	0.0002	0.2066	0.3564	0.5856
	3	5.67	2.0751	0.9208	1.1543	0.0002	1.0511	0.0321	0.0003	0.1816	0.3233	0.6205
	3	5.67	1.9528	0.8513	1.1014	0.0004	0.9596	0.0314	0.0005	0.1545	0.2883	0.6526
	3	5.67	1.8276	0.7771	1.0505	0.0006	0.8599	0.0305	0.0007	0.1265	0.2522	0.6805
	3	5.67	1.7029	0.7001	1.0028	0.0009	0.7546	0.0292	0.001	0.0991	0.216	0.7035
	3	5.67	1.5808	0.6218	0.959	0.0013	0.647	0.0276	0.0013	0.0737	0.1807	0.7208
	3	5.67	1.463	0.5439	0.9191	0.0016	0.5412	0.0258	0.0016	0.0515	0.1475	0.7323
	3	5.67	1.3514	0.468	0.8834	0.0021	0.4413	0.0239	0.0019	0.0334	0.1171	0.738
	3	5.67	1.2467	0.396	0.8507	0.0025	0.3509	0.022	0.0022	0.0196	0.0903	0.7381
	3	5.67	1.1492	0.3297	0.8195	0.0029	0.2721	0.02	0.0025	0.0099	0.0674	0.7333
	3	5.67	1.0723	0.2834	0.7888	0.0032	0.2128	0.0189	0.0025	0.0049	0.054	0.7264
	3	5.67	1.053	0.2948	0.7582	0.003	0.1859	0.0209	0.0014	0.0051	0.0664	0.7256
	3	5.67	1.028	0.3055	0.7224	0.0028	0.1586	0.0232	0.0006	0.0054	0.0809	0.7227
	3	5.67	0.9996	0.3154	0.6842	0.0025	0.1312	0.0256	0.0001	0.0057	0.0979	0.7169
	3	5.67	0.9705	0.3243	0.6461	0.0023	0.1043	0.0283	0.0001	0.0061	0.1174	0.7079
	3	5.67	0.9417	0.3319	0.6097	0.002	0.0787	0.0311	0.0006	0.0063	0.1395	0.6953
	3	5.67	0.915	0.3383	0.5768	0.0017	0.0552	0.034	0.0017	0.0067	0.164	0.6785
	3	5.67	0.8918	0.3433	0.5486	0.0014	0.0348	0.037	0.0034	0.0069	0.1906	0.6574
	3	5.67	0.8724	0.3467	0.5258	0.0011	0.0184	0.0399	0.0058	0.0072	0.219	0.6318
	3	5.67	0.8582	0.3484	0.5098	0.0008	0.0069	0.0426	0.009	0.0074	0.2484	0.6018
	3	5.67	0.8494	0.3488	0.5006	0.0006	0.0008	0.0452	0.0129	0.0076	0.2781	0.5677
	3	5.67	0.8464	0.3478	0.4987	0.0004	0.0007	0.0474	0.0174	0.0077	0.3073	0.5299
	3	5.67	0.8496	0.3452	0.5044	0.0002	0.0065	0.0492	0.0224	0.0078	0.3352	0.4894
	3	5.67	0.8584	0.3409	0.5175	0.0001	0.0181	0.0505	0.0279	0.0078	0.3611	0.4471
	3	5.67	0.8724	0.3352	0.5372	0	0.0348	0.0513	0.0337	0.0078	0.3845	0.4042
	3	5.67	0.891	0.3279	0.5631	0	0.0559	0.0517	0.0396	0.0076	0.405	0.3618
	3	5.67	0.912	0.3186	0.5934	0	0.0805	0.0517	0.0456	0.0075	0.4225	0.3209
	3	5.67	0.933	0.3073	0.6257	0	0.1078	0.0513	0.0514	0.0073	0.437	0.2823
	3	5.67	0.9506	0.2936	0.657	0.0001	0.1368	0.0506	0.057	0.0071	0.4486	0.2466
	3	5.67	6.4626	5.1781	1.2845	0.9447	0.9728	2.2144	2.55	0.0072	0.4863	0.2325
	3	5.67	7.3291	5.8831	1.446	1.1001	1.2333	2.4548	2.8958	0.0075	0.5747	0.2467
	3	5.67	8.2062	6.5916	1.6146	1.2708	1.5422	2.7056	3.2542	0.008	0.6735	0.2605
	3	5.67	9.0918	7.2997	1.7921	1.4518	1.8935	2.9586	3.603	0.0083	0.781	0.2736
	3	5.67	9.9805	8.0012	1.9792	1.6366	2.2735	3.2038	3.9223	0.0086	0.8932	0.2851
	3	5.67	10.8619	8.6866	2.1753	1.8183	2.6632	3.432	4.1984	0.0087	1.0056	0.2946
	3	5.67	11.7235	9.3445	2.379	1.9902	3.0433	3.6351	4.4233	0.0087	1.1126	0.3013
	3	5.67	12.5477	9.9606	2.5872	2.1467	3.3971	3.8071	4.594	0.0086	1.2095	0.305
	3	5.67	13.3124	10.5183	2.7941	2.2835	3.7121	3.9444	4.7106	0.0083	1.2918	0.3054
	3	5.67	13.9915	10.9988	2.9927	2.3973	3.9797	4.0452	4.7753	0.0079	1.3565	0.3024
	3	5.67	14.55	11.3799	3.1702	2.4862	4.1943	4.1094	4.7922	0.0074	1.4014	0.2964
	3	5.67	14.944	11.634	3.3099	2.5494	4.3532	4.1384	4.7667	0.0069	1.4259	0.2878
	3	5.67	15.1122	11.7253	3.3868	2.5872	4.4563	4.1348	4.7049	0.0063	1.4305	0.2773
	3	5.67	14.9924	11.5989	3.3936	2.6264	4.6582	3.9759	4.4071	0.0082	1.6056	0.2662
	3	5.67	14.0815	10.8218	3.2598	2.6182	4.5542	3.6428	3.8678	0.0111	1.706	0.2488
	3	5.67	3.9431	1.3151	2.6281	0.0329	0.0261	0.0002	0.0158	0.0126	1.7046	0.2283
	3	5.67	4.3896	1.4388	2.9508	0.0768	0.046	0.0004	0.024	0.0093	1.8569	0.2194
	3	5.67	4.8177	1.5447	3.2731	0.145	0.0736	0.0008	0.0346	0.0063	2.0022	0.2078
	3	5.67	5.2291	1.6334	3.5957	0.2402	0.1094	0.0014	0.0475	0.0036	2.1307	0.1934
	3	5.67	5.6221	1.7041	3.918	0.362	0.153	0.0021	0.0627	0.0016	2.2338	0.1762
	3	5.67	5.9928	1.7565	4.2363	0.5057	0.2025	0.0029	0.0796	0.0003	2.3055	0.1568
	3	5.67	6.3339	1.7904	4.5435	0.6638	0.2553	0.0039	0.0975	0	2.3428	0.1357
	3	5.67	6.6331	1.8044	4.8286	0.8273	0.3079	0.0049	0.1155	0.0005	2.3452	0.114
	3	5.67	6.8723	1.7971	5.0752	0.9882	0.3574	0.006	0.1325	0.002	2.3145	0.0928
	3	5.67	7.0237	1.7659	5.2578	1.14	0.4016	0.007	0.1479	0.0042	2.2548	0.0732
	3	5.67	7.0432	1.7042	5.339	1.2782	0.4391	0.008	0.161	0.0071	2.1715	0.0559
	3	5.67	8.438	3.0175	5.4205	1.3293	0.477	0.0103	0.1626	1.3031	2.2209	0.0456
	3	5.67	8.7483	3.1821	5.5662	1.3552	0.5183	0.0133	0.1608	1.5659	2.304	0.0367
	3	5.67	9.0078	3.3282	5.6796	1.3729	0.5617	0.0169	0.1578	1.864	2.3818	0.0279
	3	5.67	9.231	3.4564	5.7745	1.3801	0.6059	0.0211	0.1536	2.1888	2.4511	0.0197
	3	5.67	9.4271	3.5667	5.8605	1.375	0.6498	0.0259	0.148	2.5276	2.5086	0.0124
	3	5.67	9.6022	3.6581	5.9441	1.3563	0.6917	0.0312	0.141	2.8682	2.551	0.0064
	3	5.67	9.7588	3.7296	6.0292	1.3235	0.7299	0.037	0.1328	3.1991	2.5752	0.0022
	3	5.67	9.8973	3.78	6.1173	1.2765	0.7628	0.0432	0.1233	3.5111	2.5788	0.0002
	3	5.67	10.0156	3.8074	6.2083	1.2162	0.7891	0.0495	0.113	3.7966	2.5601	0.0005
	3	5.67	10.1083	3.8092	6.2991	1.1443	0.8077	0.0559	0.102	4.0503	2.5181	0.0032
	3	5.67	10.1677	3.7832	6.3845	1.0633	0.8182	0.0622	0.0909	4.268	2.4533	0.0082
	3	5.67	10.1818	3.7262	6.4556	0.9761	0.8206	0.0682	0.0798	4.4474	2.3674	0.0151
	3	5.67	10.1334	3.6345	6.4989	0.8863	0.8156	0.0737	0.0692	4.5871	2.2636	0.0236
	3	5.67	9.998	3.5027	6.4954	0.7971	0.804	0.0788	0.0593	4.6875	2.1462	0.0332
	3	5.67	9.741	3.3242	6.4167	0.7114	0.7872	0.0832	0.0502	4.75	2.0203	0.0435
	3	5.67	7.7032	2.0748	5.6284	0.6765	0.7401	0.0596	0.0515	4.7113	2.0038	0.055
	3	5.67	7.3899	2.0282	5.3617	0.6542	0.6653	0.0298	0.0568	4.5557	2.0104	0.0677
	3	5.67	6.9419	1.9407	5.0012	0.6228	0.5742	0.0093	0.0611	4.2947	1.983	0.0806
	3	5.67	6.3914	1.8154	4.5759	0.5827	0.4722	0.0003	0.064	3.9254	1.9179	0.0924
	3	5.67	5.7593	1.6539	4.1053	0.5354	0.3682	0.0039	0.0652	3.4557	1.8135	0.1017
	3	5.67	5.0569	1.4562	3.6007	0.4832	0.2711	0.0193	0.0648	2.9142	1.6724	0.1077
	3	5.67	2.1207	0.2902	1.8306	0.4603	0.2072	0.033	0.0864	0.0056	1.6329	0.1284
	3	5.67	2.4481	0.2212	2.2269	0.4996	0.1852	0.0226	0.1844	0.0021	1.825	0.1915
	3	5.67	2.6925	0.167	2.5255	0.5194	0.1541	0.0132	0.2964	0.0002	1.9323	0.2398
	3	5.67	2.7274	0.1602	2.5673	0.5197	0.1479	0.012	0.3195	0	1.9477	0.2518
	3	5.67	2.7007	0.1597	2.541	0.5179	0.1488	0.0127	0.3217	0	1.9507	0.2587
	3	5.67	2.6534	0.158	2.4955	0.516	0.1497	0.0134	0.3238	0	1.9536	0.2662
	3	5.67	2.5918	0.155	2.4368	0.5138	0.1506	0.0142	0.3261	0	1.9562	0.2742
	3	5.67	2.5205	0.1516	2.3689	0.5113	0.1515	0.0151	0.3284	0	1.9587	0.2827
	3	5.67	2.4429	0.1475	2.2954	0.5085	0.1525	0.0161	0.3308	0	1.9608	0.2919
	3	5.67	2.3617	0.1428	2.2189	0.5054	0.1534	0.0172	0.3333	0.0001	1.9624	0.3016
	3	5.67	2.2788	0.1378	2.141	0.5019	0.1544	0.0183	0.3358	0.0003	1.9636	0.312
	3	5.67	2.1959	0.1329	2.063	0.4979	0.1554	0.0196	0.3384	0.0004	1.964	0.323
	3	5.67	2.1139	0.1278	1.9861	0.4935	0.1563	0.021	0.3409	0.0007	1.9637	0.3347
	3	5.67	2.0336	0.1227	1.9109	0.4886	0.1572	0.0224	0.3435	0.0009	1.9623	0.3471
	3	5.67	1.9556	0.1174	1.8381	0.4831	0.1581	0.0241	0.3461	0.0013	1.9597	0.3603
	3	5.67	1.8804	0.1123	1.7681	0.477	0.159	0.0258	0.3486	0.0018	1.9557	0.3741
	3	5.67	1.8082	0.1073	1.7009	0.4702	0.1597	0.0277	0.351	0.0023	1.9501	0.3887
	3	5.67	1.7394	0.1024	1.637	0.4627	0.1604	0.0298	0.3534	0.0029	1.9426	0.404
	3	5.67	1.674	0.0978	1.5762	0.4545	0.1609	0.032	0.3557	0.0037	1.9328	0.42
	3	5.67	1.6121	0.0933	1.5188	0.4455	0.1613	0.0344	0.3578	0.0045	1.9205	0.4368
	3	5.67	1.5531	0.0884	1.4647	0.4356	0.1616	0.0369	0.3598	0.0056	1.9053	0.4542
	3	5.67	1.4978	0.0841	1.4137	0.4249	0.1616	0.0396	0.3615	0.0067	1.887	0.4722
	3	5.67	1.446	0.08	1.3661	0.4133	0.1614	0.0424	0.363	0.0079	1.8651	0.4908
	3	5.67	1.3975	0.0758	1.3217	0.4008	0.161	0.0454	0.3643	0.0094	1.8393	0.5099
	3	5.67	1.3522	0.072	1.2802	0.3874	0.1603	0.0486	0.3652	0.011	1.8093	0.5294
	3	5.67	1.3101	0.0682	1.2418	0.3731	0.1593	0.0518	0.3658	0.0127	1.7748	0.5492
	3	5.67	1.2711	0.0648	1.2063	0.3579	0.158	0.0552	0.366	0.0146	1.7355	0.5691
	3	5.67	1.2351	0.0614	1.1737	0.3419	0.1563	0.0586	0.3658	0.0167	1.6914	0.5892
	3	5.67	1.2021	0.058	1.1442	0.3253	0.1543	0.0621	0.3652	0.0189	1.6422	0.6092
	3	5.67	1.1719	0.0548	1.1171	0.308	0.1519	0.0656	0.3641	0.0213	1.588	0.6289
	3	5.67	1.1447	0.052	1.0927	0.2901	0.1491	0.0691	0.3625	0.0237	1.5289	0.6483
	3	5.67	1.1199	0.0492	1.0707	0.2719	0.1459	0.0726	0.3605	0.0264	1.4653	0.6672
	3	5.67	1.0979	0.0464	1.0515	0.2534	0.1424	0.0759	0.3579	0.0291	1.3974	0.6853
	3	5.67	1.0785	0.0438	1.0347	0.2349	0.1386	0.0792	0.3549	0.0319	1.3259	0.7026
	3	5.67	1.0616	0.0413	1.0204	0.2164	0.1345	0.0823	0.3513	0.0348	1.2513	0.719
	3	5.67	1.0474	0.0389	1.0084	0.1981	0.1301	0.0853	0.3473	0.0377	1.1746	0.7341
	3	5.67	1.0354	0.0367	0.9987	0.1803	0.1255	0.0881	0.3428	0.0407	1.0966	0.7482
	3	5.67	1.0258	0.0347	0.9911	0.163	0.1207	0.0907	0.3378	0.0437	1.0182	0.7608
	3	5.67	1.0187	0.0325	0.9862	0.1464	0.1159	0.0931	0.3325	0.0466	0.9405	0.7721
	3	5.67	1.014	0.0309	0.9832	0.1306	0.1109	0.0952	0.3267	0.0495	0.8642	0.782
	3	5.67	1.0114	0.0291	0.9823	0.1158	0.106	0.0972	0.3207	0.0523	0.7904	0.7905
	3	5.67	1.011	0.0272	0.9838	0.1019	0.101	0.0989	0.3143	0.0551	0.7195	0.7975
	3	5.67	1.0128	0.0255	0.9873	0.0891	0.0962	0.1004	0.3078	0.0578	0.6524	0.8031
	3	5.67	1.0168	0.0239	0.9929	0.0773	0.0914	0.1017	0.301	0.0604	0.5892	0.8074
	3	5.67	1.0228	0.0225	1.0004	0.0666	0.0867	0.1028	0.2942	0.0628	0.5304	0.8104
	3	5.67	1.0311	0.0211	1.01	0.057	0.0823	0.1037	0.2872	0.0652	0.4761	0.8122
	3	5.67	1.0413	0.0199	1.0214	0.0483	0.0779	0.1045	0.2802	0.0675	0.4263	0.8129
	3	5.67	1.0531	0.0183	1.0348	0.0407	0.0738	0.1051	0.2732	0.0696	0.3808	0.8126
	3	5.67	1.067	0.0175	1.0496	0.0339	0.0699	0.1056	0.2663	0.0716	0.3395	0.8114
	3	5.67	1.0825	0.0165	1.066	0.028	0.0662	0.1059	0.2594	0.0735	0.3021	0.8095
	3	5.67	1.0989	0.0149	1.084	0.0229	0.0627	0.1062	0.2527	0.0752	0.2685	0.8068
	3	5.67	1.1169	0.0143	1.1027	0.0184	0.0594	0.1063	0.2461	0.0769	0.2384	0.8035
	3	5.67	1.1354	0.0129	1.1224	0.0147	0.0562	0.1064	0.2396	0.0784	0.2113	0.7998
	3	5.67	1.1548	0.0123	1.1425	0.0115	0.0533	0.1063	0.2334	0.0799	0.1872	0.7956
	3	5.67	1.1738	0.0112	1.1626	0.0088	0.0506	0.1063	0.2274	0.0812	0.1657	0.7911
	3	5.67	1.1923	0.0106	1.1816	0.0066	0.048	0.1061	0.2216	0.0825	0.1465	0.7864
	3	5.67	1.2091	0.0096	1.1995	0.0048	0.0456	0.1059	0.216	0.0836	0.1295	0.7814
	3	5.67	1.2236	0	1.2236	0.0034	0.0434	0.1057	0.2106	0.0847	0.1144	0.7764
	3	5.67	1.234	0.0079	1.2261	0.0023	0.0413	0.1055	0.2055	0.0857	0.1009	0.7712
	3	5.67	1.2394	0.0074	1.2319	0.0014	0.0394	0.1052	0.2006	0.0866	0.089	0.7661
	3	5.67	1.2369	0.0066	1.2303	0.0008	0.0376	0.1049	0.1959	0.0874	0.0785	0.7609
	3	5.67	1.2246	0.0057	1.2189	0.0004	0.036	0.1046	0.1914	0.0882	0.0691	0.7558
	3	5.67	1.1946	0.0023	1.1923	0	0.0322	0.0951	0.2034	0.0912	0.0568	0.7443
	3	5.67	1.1515	0.0002	1.1512	0.0005	0.028	0.0842	0.2182	0.0945	0.0442	0.7291
	3	5.67	1.1005	0.0006	1.0999	0.0019	0.0237	0.073	0.2342	0.0979	0.0321	0.7104
	3	5.67	1.0455	0.0038	1.0417	0.0044	0.0193	0.0617	0.2513	0.1012	0.021	0.6876
	3	5.67	0.9897	0.0106	0.9791	0.0084	0.0151	0.0506	0.2693	0.1044	0.0116	0.6605
	3	5.67	0.9358	0.0205	0.9153	0.0139	0.011	0.0398	0.2881	0.1074	0.0046	0.6287
	3	5.67	0.8862	0.0349	0.8513	0.0212	0.0073	0.0297	0.3072	0.11	0.0006	0.5922
	3	5.67	0.8423	0.0531	0.7892	0.0303	0.0042	0.0205	0.3263	0.1121	0.0006	0.5511
	3	5.67	0.8058	0.0757	0.7301	0.0414	0.0018	0.0127	0.3448	0.1135	0.0053	0.5058
	3	5.67	0.7781	0.103	0.675	0.0543	0.0004	0.0065	0.3622	0.1142	0.0151	0.4571
	3	5.67	0.7596	0.1348	0.6249	0.069	0	0.0023	0.3779	0.1139	0.0304	0.406
	3	5.67	0.7515	0.1711	0.5803	0.0853	0.0007	0.0002	0.3913	0.1128	0.0511	0.3537
	3	5.67	0.7535	0.2117	0.5419	0.1027	0.0027	0.0004	0.4017	0.1108	0.0767	0.3017
	3	5.67	0.766	0.256	0.51	0.1211	0.0057	0.0028	0.4089	0.108	0.1064	0.2515
	3	5.67	0.7889	0.3044	0.4845	0.14	0.0098	0.0074	0.4125	0.1044	0.1392	0.2045
	3	5.67	0.821	0.3552	0.4658	0.159	0.0147	0.014	0.4126	0.1002	0.1739	0.1619
	3	5.67	0.8613	0.4078	0.4535	0.1777	0.0202	0.0224	0.4092	0.0955	0.2093	0.1244
	3	5.67	0.9083	0.4614	0.4469	0.1958	0.0261	0.0322	0.4029	0.0906	0.2443	0.0924
	3	5.67	0.9594	0.514	0.4453	0.2132	0.0322	0.0431	0.394	0.0854	0.2781	0.066
	3	5.67	1.0116	0.5641	0.4475	0.2295	0.0383	0.0547	0.3832	0.0803	0.31	0.0449
	3	5.67	1.0605	0.6089	0.4517	0.2447	0.0444	0.0667	0.371	0.0753	0.3394	0.0287
	3	5.67	1.101	0.6455	0.4554	0.2587	0.0502	0.079	0.358	0.0704	0.3663	0.0168
	3	5.67	1.307	0.8418	0.4652	0.312	0.0787	0.1107	0.3919	0.0572	0.4552	0.026
	3	5.67	1.7671	1.2771	0.49	0.4177	0.1484	0.1743	0.4781	0.0372	0.6316	0.0716
	3	5.67	2.3209	1.7952	0.5258	0.5355	0.2418	0.2522	0.5672	0.0204	0.8308	0.1422
	3	5.67	2.946	2.3726	0.5735	0.6581	0.3547	0.3388	0.6539	0.0083	1.0378	0.2356
	3	5.67	3.6038	2.9729	0.6309	0.7773	0.4799	0.4263	0.733	0.0014	1.236	0.346
	3	5.67	4.2408	3.5492	0.6917	0.886	0.6089	0.5064	0.8006	0.0002	1.4109	0.4657
	3	5.67	4.4752	3.7517	0.7235	0.9336	0.6558	0.5313	0.8014	0.0016	1.4851	0.5393
	3	5.67	4.3282	3.6039	0.7244	0.9286	0.6201	0.5089	0.7419	0.0017	1.4798	0.5654
	3	5.67	4.1432	3.4226	0.7206	0.9195	0.5808	0.4837	0.6786	0.0018	1.4691	0.5921
	3	5.67	3.9309	3.2163	0.7146	0.9056	0.538	0.4558	0.6115	0.0018	1.4519	0.6189
	3	5.67	3.6992	2.9911	0.7081	0.8863	0.4921	0.4252	0.5419	0.0018	1.4273	0.6451
	3	5.67	3.4557	2.7532	0.7025	0.861	0.4433	0.3921	0.4703	0.0019	1.3947	0.6698
	3	5.67	3.2062	2.5073	0.6989	0.8293	0.3925	0.3568	0.3986	0.0019	1.3534	0.6921
	3	5.67	2.9565	2.2584	0.6981	0.7911	0.3405	0.3197	0.3279	0.002	1.3032	0.7111
	3	5.67	2.7109	2.0101	0.7008	0.7467	0.2883	0.2817	0.2605	0.0019	1.2441	0.7258
	3	5.67	2.4738	1.7666	0.7072	0.6967	0.2372	0.2435	0.1977	0.0019	1.1767	0.7354
	3	5.67	2.2483	1.5306	0.7177	0.642	0.1887	0.2059	0.1418	0.0019	1.1018	0.7395
	3	5.67	2.0375	1.3052	0.7323	0.5838	0.1441	0.1699	0.0938	0.0018	1.0209	0.7377
	3	5.67	1.8439	1.0933	0.7506	0.5238	0.1045	0.1364	0.0554	0.0017	0.9357	0.7301
	3	5.67	1.6689	0.8962	0.7727	0.4634	0.0709	0.106	0.0269	0.0017	0.8483	0.7171
	3	5.67	1.5145	0.7169	0.7976	0.4044	0.0439	0.0793	0.0089	0.0015	0.7608	0.6991
	3	5.67	1.381	0.5565	0.8245	0.3483	0.0236	0.0566	0.0006	0.0015	0.6753	0.6771
	3	5.67	1.2679	0.4164	0.8516	0.2961	0.0099	0.0381	0.0018	0.0013	0.5937	0.6519
	3	5.67	1.1742	0.2971	0.8771	0.2487	0.0022	0.0236	0.011	0.0013	0.5174	0.6245
	3	5.67	1.0978	0.1992	0.8986	0.2065	0	0.013	0.0274	0.0011	0.4474	0.5958
	3	5.67	1.0347	0.1224	0.9122	0.1696	0.0023	0.0057	0.0494	0.0011	0.3842	0.5666
	3	5.67	0.9989	0.0863	0.9126	0.151	0.0042	0.0021	0.0661	0.0014	0.3509	0.5484
	3	5.67	0.9706	0.0677	0.9028	0.1418	0.004	0.0003	0.0783	0.0024	0.3333	0.5361
	3	5.67	0.938	0.0504	0.8876	0.132	0.0039	0.0001	0.0924	0.0037	0.3144	0.5219
	3	5.67	0.9036	0.0347	0.8689	0.1216	0.0037	0.0019	0.1085	0.0055	0.2941	0.5059
	3	5.67	0.8698	0.021	0.8488	0.1106	0.0035	0.006	0.1268	0.0077	0.2724	0.4877
	3	5.67	0.839	0.0104	0.8286	0.0992	0.0033	0.0127	0.1475	0.0104	0.2496	0.4673
	3	5.67	0.8125	0.0032	0.8093	0.0874	0.0031	0.0225	0.1706	0.0138	0.2258	0.4446
	3	5.67	0.7921	0.0001	0.792	0.0754	0.0029	0.0356	0.1962	0.0177	0.2013	0.4196
	3	5.67	0.7788	0.0016	0.7772	0.0635	0.0027	0.0524	0.2242	0.0223	0.1762	0.3924
	3	5.67	0.7737	0.0078	0.7659	0.0518	0.0024	0.0731	0.2547	0.0276	0.1511	0.3632
	3	5.67	0.7776	0.0194	0.7582	0.0407	0.0022	0.0979	0.2874	0.0336	0.1265	0.3322
	3	5.67	0.7913	0.0367	0.7545	0.0304	0.002	0.1267	0.322	0.0401	0.1028	0.2998
	3	5.67	0.8156	0.0603	0.7552	0.0212	0.0017	0.1595	0.3582	0.0473	0.0805	0.2666
	3	5.67	0.8507	0.0901	0.7606	0.0134	0.0015	0.1961	0.3955	0.055	0.0602	0.2332
	3	5.67	0.8972	0.1265	0.7708	0.0073	0.0013	0.2362	0.4336	0.063	0.0424	0.2003
	3	5.67	0.9551	0.1694	0.7856	0.003	0.0011	0.2793	0.4718	0.0714	0.0275	0.1686
	3	5.67	1.0244	0.2188	0.8057	0.0005	0.0009	0.3248	0.5097	0.0798	0.0158	0.1387
	3	5.67	1.1052	0.2751	0.8301	0	0.0007	0.3723	0.5468	0.0883	0.0073	0.1113
	3	5.67	1.1968	0.3378	0.859	0.0013	0.0006	0.421	0.5825	0.0966	0.0021	0.0867
	3	5.67	1.2986	0.4061	0.8925	0.0042	0.0004	0.4703	0.6166	0.1046	0.0001	0.0654
	3	5.67	1.4094	0.4802	0.9292	0.0085	0.0003	0.5197	0.6487	0.1124	0.001	0.0474
	3	5.67	1.5277	0.5587	0.969	0.0141	0.0002	0.5685	0.6785	0.1197	0.0045	0.0327
	3	5.67	1.6512	0.6404	1.0109	0.0206	0.0001	0.6163	0.706	0.1266	0.0103	0.0211
	3	5.67	1.7767	0.7236	1.0531	0.0278	0	0.6628	0.7309	0.1329	0.0179	0.0124
	3	5.67	1.9005	0.8068	1.0938	0.0355	0	0.7074	0.7534	0.1387	0.027	0.0063
	3	5.67	2.0172	0.8864	1.1309	0.0435	0	0.7501	0.7733	0.144	0.0372	0.0024
	3	5.67	2.1202	0.9594	1.1609	0.0516	0	0.7906	0.7909	0.1488	0.0482	0.0005
	3	5.67	2.1322	0.9836	1.1486	0.0535	0	0.8035	0.78	0.1507	0.0596	0.0001
	3	5.67	2.0156	0.9401	1.0756	0.0459	0.0002	0.7744	0.7255	0.1483	0.0719	0.0004
	3	5.67	1.8798	0.8867	0.993	0.0379	0.0005	0.7411	0.6663	0.1451	0.0861	0.001
	3	5.67	1.7325	0.8262	0.9064	0.03	0.001	0.7032	0.6029	0.1411	0.1023	0.0019
	3	5.67	1.58	0.7609	0.8191	0.0222	0.0017	0.6608	0.5359	0.136	0.1206	0.0033
	3	5.67	1.4272	0.6924	0.7349	0.0151	0.0026	0.6138	0.4665	0.1299	0.1406	0.005
	3	5.67	1.2786	0.6221	0.6565	0.0089	0.0039	0.5626	0.3958	0.1229	0.1621	0.0073
	3	5.67	1.1372	0.5516	0.5856	0.0041	0.0053	0.5078	0.3259	0.1149	0.1847	0.0099
	3	5.67	1.0063	0.4821	0.5243	0.0011	0.007	0.4505	0.2585	0.1061	0.2077	0.013
	3	5.67	0.8882	0.4146	0.4736	0	0.0089	0.3918	0.196	0.0967	0.2305	0.0165
	3	5.67	0.7847	0.3501	0.4346	0.001	0.0109	0.3333	0.1402	0.0871	0.2525	0.0202
	3	5.67	0.6971	0.2898	0.4073	0.004	0.0131	0.2768	0.093	0.0772	0.2729	0.0241
	3	5.67	0.6262	0.2339	0.3923	0.0089	0.0152	0.2239	0.0555	0.0676	0.2914	0.028
	3	5.67	0.5724	0.1836	0.3888	0.0152	0.0174	0.176	0.0279	0.0584	0.3075	0.0317
	3	5.67	0.5349	0.1394	0.3955	0.0226	0.0194	0.1341	0.0102	0.0497	0.3211	0.0354
	3	5.67	0.5122	0.1012	0.411	0.0307	0.0214	0.0987	0.0015	0.0418	0.3322	0.0387
	3	5.67	0.502	0.0698	0.4321	0.0392	0.0231	0.0699	0.0006	0.0348	0.3409	0.0418
	3	5.67	0.4788	0.0269	0.4519	0.0623	0.0143	0.0427	0.0052	0.0445	0.3154	0.0496
	3	5.67	0.4756	0.0035	0.472	0.1445	0.0001	0.0146	0.0104	0.1148	0.2168	0.0721
	3	5.67	0.598	0.0889	0.5092	0.267	0.0217	0.0008	0.0175	0.2227	0.1276	0.0995
	3	5.67	0.8625	0.2968	0.5658	0.426	0.0841	0.0047	0.0267	0.3674	0.0569	0.1311
	3	5.67	1.2693	0.6281	0.6412	0.6104	0.1869	0.0278	0.0374	0.5435	0.013	0.1663
	3	5.67	1.8002	1.0675	0.7327	0.8062	0.3237	0.0689	0.0496	0.7418	0.0002	0.2037
	3	5.67	2.4197	1.5864	0.8333	1.0008	0.4848	0.125	0.0623	0.9525	0.0174	0.2422
	3	5.67	3.2007	2.2694	0.9313	1.1147	0.6348	0.224	0.0952	1.2465	0.059	0.3128
	3	5.67	4.1355	3.124	1.0115	1.0924	0.743	0.3903	0.159	1.6257	0.1239	0.4211
	3	5.67	5.0089	3.9398	1.0691	0.9764	0.8036	0.5813	0.2265	1.9765	0.2024	0.5239
	4	5.67	7.2354	2.7217	4.5137	0.841	0.0107	0.0433	0.0214	0.3499	2.1525	3.1521
	4	5.67	7.1776	2.6967	4.481	0.7886	0.0145	0.0392	0.0199	0.3434	2.1519	3.1847
	4	5.67	7.0532	2.653	4.4003	0.7325	0.0192	0.035	0.0182	0.3355	2.1464	3.2093
	4	5.67	6.8788	2.5942	4.2845	0.6729	0.0249	0.0306	0.0164	0.326	2.1351	3.2238
	4	5.67	6.6663	2.522	4.1443	0.6103	0.0318	0.0261	0.0146	0.3148	2.1169	3.2262
	4	5.67	6.4258	2.4386	3.9872	0.5454	0.0399	0.0216	0.0127	0.3017	2.091	3.2144
	4	5.67	6.1654	2.3453	3.8201	0.4792	0.0494	0.0172	0.0108	0.2866	2.0564	3.1865
	4	5.67	5.8909	2.2441	3.6467	0.4125	0.0602	0.013	0.0089	0.2697	2.0125	3.1411
	4	5.67	5.6074	2.1356	3.4718	0.3467	0.0723	0.0092	0.007	0.251	1.9588	3.0768
	4	5.67	5.319	2.0219	3.2971	0.2833	0.0855	0.0059	0.0053	0.2308	1.8955	2.9927
	4	5.67	5.0289	1.9037	3.1252	0.2235	0.0997	0.0032	0.0038	0.2094	1.8227	2.8886
	4	5.67	4.74	1.7823	2.9576	0.169	0.1144	0.0013	0.0025	0.1873	1.7411	2.7646
	4	5.67	4.4541	1.6581	2.796	0.1208	0.1295	0.0002	0.0014	0.1649	1.6519	2.6216
	4	5.67	4.1733	1.5327	2.6406	0.0801	0.1445	0	0.0006	0.1429	1.5567	2.4612
	4	5.67	3.899	1.4077	2.4913	0.0476	0.159	0.0007	0.0002	0.1217	1.4571	2.2859
	4	5.67	3.6318	1.2832	2.3486	0.0237	0.1726	0.0022	0	0.1018	1.355	2.0993
	4	5.67	3.373	1.1608	2.2123	0.0082	0.1852	0.0045	0.0001	0.0835	1.2525	1.9058
	4	5.67	3.1222	1.0409	2.0813	0.0009	0.1965	0.0074	0.0005	0.0672	1.1512	1.7108
	4	5.67	2.8796	0.9246	1.9551	0.001	0.2063	0.0108	0.0011	0.0528	1.0528	1.5198
	4	5.67	2.6442	0.8129	1.8313	0.0079	0.2148	0.0145	0.0019	0.0406	0.9587	1.3383
	4	5.67	2.4146	0.7062	1.7084	0.0205	0.2219	0.0185	0.0028	0.0303	0.8697	1.1706
	4	5.67	2.1888	0.6058	1.583	0.0379	0.2277	0.0225	0.0039	0.0219	0.7866	1.0191
	4	5.67	1.0475	0.2986	0.7489	0.0574	0.215	0.0247	0.0038	0.0179	0.7451	0.0311
	4	5.67	0.985	0.2592	0.7258	0.0808	0.1886	0.0255	0.003	0.0157	0.7214	0.0282
	4	5.67	0.9133	0.2162	0.6971	0.1093	0.1599	0.0262	0.0022	0.0134	0.6888	0.0247
	4	5.67	0.838	0.1722	0.6658	0.1423	0.13	0.0267	0.0015	0.011	0.6469	0.0209
	4	5.67	0.7632	0.13	0.6332	0.1783	0.1002	0.0269	0.0009	0.0087	0.5969	0.0169
	4	5.67	0.6924	0.0911	0.6013	0.2154	0.0722	0.0269	0.0004	0.0065	0.5399	0.013
	4	5.67	0.6284	0.0583	0.5701	0.2514	0.0476	0.0267	0.0002	0.0045	0.4787	0.0094
	4	5.67	0.5723	0.0323	0.5399	0.2843	0.0277	0.0262	0	0.0029	0.4156	0.0062
	4	5.67	0.524	0.0142	0.5099	0.3129	0.0133	0.0256	0.0001	0.0016	0.3537	0.0037
	4	5.67	0.4823	0.0035	0.4788	0.3363	0.0044	0.0247	0.0003	0.0007	0.2952	0.0019
	4	5.67	0.5024	0	0.5024	0.3736	0	0.0308	0.0013	0	0.2923	0.0016
	4	5.67	0.5592	0.0056	0.5536	0.4186	0.0066	0.0418	0.0037	0.0014	0.3104	0.0017
	4	5.67	0.6315	0.0215	0.61	0.4603	0.0274	0.0544	0.0077	0.0057	0.3257	0.0018
	4	5.67	0.7194	0.0482	0.6711	0.494	0.0633	0.0684	0.0132	0.0132	0.3373	0.0019
	4	5.67	0.8217	0.0851	0.7366	0.515	0.114	0.083	0.0201	0.0236	0.3444	0.002
	4	5.67	0.9335	0.1292	0.8043	0.5198	0.1777	0.0974	0.0281	0.0365	0.3466	0.002
	4	5.67	1.0485	0.1783	0.8701	0.5078	0.2515	0.1109	0.0371	0.051	0.3442	0.002
	4	5.67	1.1559	0.2273	0.9286	0.4815	0.3316	0.1228	0.0465	0.0661	0.3376	0.0019
	4	5.67	1.0516	0.1432	0.9084	0.454	0.2798	0.0962	0.0275	0.0451	0.3768	0.0044
	4	5.67	0.951	0.0737	0.8773	0.4235	0.2271	0.0711	0.0126	0.0267	0.42	0.0082
	4	5.67	0.8636	0.0245	0.8391	0.3899	0.1751	0.0482	0.0029	0.0121	0.467	0.0136
	4	5.67	0.7979	0.0011	0.7968	0.3536	0.1256	0.0287	0.0002	0.0027	0.5172	0.0208
	4	5.67	0.7609	0.0087	0.7522	0.315	0.0809	0.0135	0.0056	0.0001	0.5698	0.0302
	4	5.67	0.7587	0.0514	0.7073	0.2748	0.0436	0.0036	0.0207	0.0056	0.6236	0.0416
	4	5.67	0.7961	0.1328	0.6633	0.234	0.0164	0	0.0463	0.0205	0.6772	0.0551
	4	5.67	0.8763	0.2546	0.6217	0.1936	0.0019	0.0033	0.0831	0.0454	0.729	0.0704
	4	5.67	1.0009	0.4181	0.5828	0.1548	0.0018	0.014	0.1305	0.0801	0.7773	0.0871
	4	5.67	1.1687	0.6215	0.5472	0.1189	0.0167	0.0322	0.188	0.124	0.8205	0.1045
	4	5.67	1.3776	0.8618	0.5157	0.0869	0.0461	0.0575	0.2536	0.1754	0.8574	0.122
	4	5.67	1.6224	1.1344	0.488	0.0597	0.0884	0.0892	0.3259	0.2327	0.8871	0.1389
	4	5.67	1.8955	1.4313	0.4642	0.0376	0.141	0.1265	0.4023	0.2936	0.9091	0.1548
	4	5.67	2.1877	1.7438	0.444	0.021	0.2011	0.1682	0.481	0.3564	0.9236	0.1691
	4	5.67	2.4869	2.0605	0.4264	0.0094	0.2659	0.213	0.5598	0.4193	0.9308	0.1816
	4	5.67	2.7783	2.368	0.4103	0.0027	0.3327	0.2598	0.6375	0.4808	0.9318	0.1923
	4	5.67	3.0887	2.6866	0.4021	0.0004	0.4014	0.3131	0.7425	0.5483	0.9287	0.1979
	4	5.67	3.7521	3.2632	0.4889	0.0065	0.4868	0.42	1.1241	0.6908	0.9231	0.1681
	4	5.67	4.3243	3.7103	0.614	0.0203	0.5669	0.5118	1.4594	0.8209	0.8925	0.1324
	4	5.67	4.502	3.8372	0.6648	0.0282	0.5692	0.5477	1.5769	0.8571	0.9044	0.1054
	4	5.67	4.3715	3.7498	0.6217	0.0245	0.499	0.5486	1.5247	0.8117	0.981	0.0882
	4	5.67	4.2046	3.6234	0.5812	0.0205	0.4257	0.5461	1.4592	0.7591	1.061	0.0712
	4	5.67	4.0121	3.4635	0.5486	0.0165	0.351	0.5396	1.38	0.6992	1.1424	0.0549
	4	5.67	3.8046	3.276	0.5286	0.0124	0.277	0.5285	1.2873	0.6327	1.2233	0.0398
	4	5.67	3.59	3.0651	0.5249	0.0086	0.2063	0.5125	1.1823	0.5604	1.3009	0.0264
	4	5.67	3.3766	2.8367	0.5399	0.0052	0.142	0.4917	1.0665	0.4843	1.3727	0.0152
	4	5.67	3.1718	2.5967	0.5751	0.0026	0.0871	0.4663	0.9429	0.4065	1.436	0.0069
	4	5.67	2.9812	2.3497	0.6315	0.0009	0.0443	0.437	0.8151	0.33	1.489	0.0018
	4	5.67	2.8101	2.1017	0.7084	0.0001	0.0155	0.4047	0.6873	0.2578	1.53	0
	4	5.67	2.6613	1.8571	0.8042	0.0003	0.0015	0.3703	0.5643	0.1926	1.5583	0.0017
	4	5.67	2.5359	1.6196	0.9163	0.0014	0.0018	0.3352	0.4506	0.1365	1.5737	0.0066
	4	5.67	2.4327	1.3928	1.0399	0.0032	0.0148	0.3003	0.3494	0.0908	1.577	0.0143
	4	5.67	2.347	1.179	1.1681	0.0055	0.0383	0.2666	0.2628	0.0555	1.569	0.0245
	4	5.67	2.2706	0.9795	1.2911	0.0081	0.0701	0.2349	0.1912	0.03	1.5518	0.0365
	4	5.67	1.9814	0.5804	1.401	0.0105	0.1208	0.1678	0.1025	0.0007	1.3222	0.0941
	4	5.67	1.7654	0.2393	1.5261	0.0131	0.189	0.1024	0.0338	0.0232	1.045	0.1923
	4	5.67	1.7085	0.0381	1.6704	0.0158	0.2715	0.0491	0.0013	0.1163	0.7596	0.3268
	4	5.67	1.8394	0.0114	1.828	0.0182	0.3629	0.0139	0.0137	0.2755	0.4919	0.4899
	4	5.67	2.1465	0.1633	1.9832	0.0201	0.4567	0.0001	0.0706	0.4768	0.2705	0.6678
	4	5.67	2.5782	0.4696	2.1086	0.0214	0.5467	0.0077	0.1627	0.6933	0.1152	0.8454
	4	5.67	2.7504	0.6188	2.1316	0.0167	0.5989	0.0151	0.2078	0.7657	0.0841	0.8989
	4	5.67	2.8351	0.717	2.118	0.0112	0.6459	0.0206	0.241	0.8036	0.0732	0.9224
	4	5.67	2.9098	0.8218	2.088	0.0065	0.6963	0.0275	0.2786	0.8425	0.0625	0.9445
	4	5.67	2.9786	0.9333	2.0453	0.0029	0.7497	0.0357	0.3208	0.8817	0.0518	0.964
	4	5.67	3.0452	1.052	1.9932	0.0006	0.8056	0.0456	0.3677	0.92	0.0416	0.9798
	4	5.67	3.1113	1.1766	1.9347	0	0.8632	0.0571	0.419	0.9565	0.0319	0.9906
	4	5.67	3.1793	1.308	1.8713	0.0013	0.9214	0.0703	0.4742	0.9899	0.0231	0.9953
	4	5.67	3.2495	1.4446	1.8049	0.0049	0.9791	0.0851	0.5325	1.0189	0.0154	0.9928
	4	5.67	3.3235	1.5867	1.7368	0.0109	1.035	0.1013	0.5929	1.0423	0.0091	0.9823
	4	5.67	3.4009	1.733	1.6678	0.0193	1.0877	0.1189	0.654	1.0591	0.0042	0.9635
	4	5.67	3.4812	1.8824	1.5988	0.0303	1.136	0.1374	0.7145	1.0687	0.0012	0.9364
	4	5.67	3.5638	2.0336	1.5303	0.0437	1.1786	0.1564	0.7731	1.0707	0	0.9017
	4	5.67	3.6473	2.1851	1.4623	0.0592	1.2147	0.1757	0.8284	1.065	0.0007	0.8602
	4	5.67	3.7295	2.3344	1.3951	0.0765	1.2434	0.1947	0.8794	1.052	0.0033	0.8134
	4	5.67	3.808	2.4791	1.3289	0.0952	1.2643	0.213	0.9253	1.0323	0.0077	0.7628
	4	5.67	3.8792	2.616	1.2632	0.1148	1.2775	0.2304	0.9654	1.0068	0.0137	0.7099
	4	5.67	3.939	2.7413	1.1976	0.1349	1.283	0.2466	0.9995	0.9765	0.0213	0.6565
	4	5.67	3.9828	2.8513	1.1315	0.155	1.2816	0.2614	1.0276	0.9428	0.03	0.6038
	4	5.67	4.0042	2.9403	1.0638	0.1749	1.2739	0.2746	1.0499	0.9066	0.0398	0.553
	4	5.67	3.9961	3.0028	0.9933	0.1941	1.2608	0.2863	1.0667	0.869	0.0503	0.5048
	4	5.67	3.8433	2.9291	0.9142	0.2019	1.2039	0.3024	1.0477	0.8148	0.0484	0.4533
	4	5.67	3.395	2.5745	0.8206	0.1824	1.0452	0.3314	0.9469	0.7151	0.0211	0.3861
	4	5.67	2.9225	2.191	0.7314	0.1595	0.8777	0.3586	0.8348	0.605	0.0041	0.3179
	4	5.67	2.4526	1.7972	0.6554	0.1338	0.7073	0.3817	0.7137	0.4885	0.0006	0.251
	4	5.67	2.0099	1.4108	0.5991	0.107	0.5414	0.3991	0.5873	0.3716	0.0129	0.188
	4	5.67	1.6152	1.0491	0.5662	0.0808	0.3883	0.4091	0.4613	0.2618	0.0411	0.1316
	4	5.67	1.2849	0.7275	0.5574	0.057	0.2562	0.4115	0.3428	0.1672	0.0833	0.0841
	4	5.67	1.0291	0.4592	0.5698	0.0371	0.1509	0.4064	0.239	0.0935	0.1363	0.0471
	4	5.67	0.9591	0.37	0.5891	0.0277	0.1081	0.4146	0.2115	0.0699	0.1621	0.0364
	4	5.67	1.0159	0.4165	0.5994	0.0253	0.1054	0.4424	0.2506	0.0801	0.154	0.0446
	4	5.67	1.0718	0.4658	0.606	0.0226	0.1021	0.4714	0.2958	0.0917	0.1448	0.0543
	4	5.67	1.1284	0.5175	0.611	0.0198	0.0983	0.5012	0.3472	0.1046	0.1343	0.0654
	4	5.67	1.1869	0.5718	0.6151	0.0168	0.0938	0.5311	0.4045	0.1189	0.1227	0.0781
	4	5.67	1.248	0.6279	0.6201	0.0138	0.0886	0.5601	0.4672	0.1342	0.1099	0.0923
	4	5.67	1.3127	0.6864	0.6263	0.0108	0.0829	0.5872	0.5341	0.1503	0.0962	0.1078
	4	5.67	1.3807	0.7462	0.6345	0.0079	0.0766	0.6113	0.6035	0.1667	0.0819	0.1245
	4	5.67	1.4523	0.8071	0.6451	0.0054	0.0698	0.6314	0.6734	0.183	0.0676	0.1421
	4	5.67	1.527	0.8688	0.6582	0.0032	0.0626	0.6464	0.7417	0.1983	0.0535	0.16
	4	5.67	1.6039	0.9298	0.6741	0.0015	0.0554	0.6558	0.8065	0.2122	0.0404	0.178
	4	5.67	1.6818	0.9896	0.6921	0.0005	0.0481	0.6592	0.8659	0.2239	0.0287	0.1956
	4	5.67	1.7593	1.047	0.7123	0	0.0411	0.6567	0.9183	0.2333	0.019	0.2122
	4	5.67	1.8339	1.1006	0.7333	0.0001	0.0345	0.6485	0.9628	0.2399	0.0112	0.2275
	4	5.67	1.903	1.1484	0.7545	0.0006	0.0284	0.6354	0.9986	0.2438	0.0057	0.2413
	4	5.67	1.9628	1.189	0.7738	0.0017	0.0229	0.6182	1.0257	0.2452	0.0021	0.2534
	4	5.67	2.0087	1.2192	0.7894	0.003	0.0181	0.5979	1.0442	0.2444	0.0004	0.2637
	4	5.67	2.0347	1.2365	0.7982	0.0046	0.014	0.5755	1.0549	0.2418	0.0001	0.2723
	4	5.67	2.0328	1.2371	0.7958	0.0063	0.0105	0.5518	1.0586	0.2379	0.0012	0.2792
	4	5.67	2.0829	1.2937	0.7892	0.0039	0.0119	0.5549	1.0839	0.28	0.0007	0.268
	4	5.67	2.1154	1.3403	0.775	0.0019	0.0134	0.5547	1.105	0.328	0.0003	0.2545
	4	5.67	2.1346	1.3773	0.7573	0.0006	0.0149	0.5506	1.1204	0.3816	0.0001	0.2385
	4	5.67	2.1444	1.4053	0.7391	0	0.0166	0.5417	1.128	0.4397	0.0001	0.22
	4	5.67	2.1464	1.4242	0.7222	0.0003	0.0183	0.5274	1.1262	0.5003	0.0005	0.1994
	4	5.67	2.1422	1.434	0.7083	0.0017	0.0199	0.5073	1.1136	0.5609	0.0011	0.1769
	4	5.67	2.1327	1.4344	0.6982	0.0042	0.0215	0.4816	1.0892	0.6185	0.002	0.1534
	4	5.67	2.1179	1.425	0.6929	0.0079	0.0229	0.4508	1.0527	0.6699	0.0032	0.1295
	4	5.67	2.0979	1.4055	0.6924	0.0126	0.024	0.4157	1.0045	0.7128	0.0047	0.1063
	4	5.67	2.0712	1.375	0.6962	0.0181	0.0249	0.3777	0.9459	0.7455	0.0064	0.0845
	4	5.67	2.0366	1.3333	0.7034	0.0243	0.0255	0.3383	0.8795	0.7673	0.0082	0.065
	4	5.67	1.9921	1.2798	0.7123	0.0309	0.0258	0.2991	0.8078	0.7786	0.0102	0.048
	4	5.67	1.9346	1.214	0.7206	0.0376	0.0259	0.2614	0.7343	0.7805	0.0123	0.0339
	4	5.67	1.8601	1.1356	0.7245	0.0444	0.0258	0.2263	0.6617	0.7745	0.0143	0.0226
	4	5.67	1.7722	1.0587	0.7135	0.0531	0.0262	0.2042	0.591	0.7596	0.0166	0.0152
	4	5.67	1.6693	0.9867	0.6826	0.0662	0.0276	0.1963	0.514	0.7317	0.0196	0.0105
	4	5.67	1.5435	0.8983	0.6451	0.0806	0.0285	0.1858	0.4309	0.6925	0.0229	0.0063
	4	5.67	1.402	0.7968	0.6052	0.0955	0.0288	0.1728	0.3452	0.6416	0.0263	0.0029
	4	5.67	1.2521	0.6869	0.5652	0.1096	0.0284	0.1576	0.2611	0.5794	0.0296	0.0007
	4	5.67	1.1007	0.5736	0.5271	0.1216	0.0273	0.1408	0.1837	0.5079	0.0328	0
	4	5.67	0.9535	0.462	0.4915	0.1307	0.0256	0.1231	0.1176	0.4308	0.0355	0.0008
	4	5.67	0.8146	0.3562	0.4584	0.1364	0.0233	0.1055	0.066	0.3536	0.0378	0.003
	4	5.67	3.3926	1.9474	1.4452	0.141	2.0332	0.0927	0.0329	0.2905	0.6848	0.0051
	4	5.67	3.8307	2.2662	1.5645	0.1654	2.2613	0.1203	0.0322	0.3145	0.8184	0.0005
	4	5.67	4.293	2.609	1.684	0.1926	2.5041	0.1531	0.0313	0.3389	0.9706	0.001
	4	5.67	4.7799	2.9735	1.8064	0.2225	2.7557	0.1911	0.03	0.3629	1.1402	0.0082
	4	5.67	5.2896	3.3561	1.9335	0.2545	3.0081	0.2341	0.0285	0.3854	1.3243	0.0234
	4	5.67	5.8177	3.7516	2.0662	0.2879	3.2525	0.2818	0.0266	0.4051	1.518	0.0476
	4	5.67	6.3579	4.1538	2.2041	0.3215	3.4802	0.3334	0.0244	0.4211	1.7149	0.0812
	4	5.67	6.9001	4.5536	2.3466	0.3543	3.6832	0.3878	0.0221	0.4324	1.9074	0.1231
	4	5.67	7.4321	4.9414	2.4907	0.385	3.8551	0.4436	0.0195	0.4384	2.0877	0.1715
	4	5.67	7.9381	5.3052	2.6329	0.4125	3.9909	0.4995	0.017	0.4391	2.2483	0.2239
	4	5.67	8.3981	5.6313	2.7667	0.4359	4.0877	0.554	0.0145	0.4348	2.3829	0.2775
	4	5.67	8.7876	5.9038	2.8838	0.4548	4.1443	0.606	0.0122	0.4259	2.4872	0.3297
	4	5.67	9.0759	6.105	2.9709	0.4688	4.1616	0.6544	0.01	0.4134	2.5588	0.3785
	4	5.67	13.5953	9.1648	4.4305	0.4801	4.1358	0.6897	0.0085	4.7803	2.6001	0.4263
	4	5.67	13.7277	9.2067	4.521	0.5079	4.0176	0.6414	0.0104	4.9941	2.6345	0.5108
	4	5.67	13.7346	9.168	4.5667	0.535	3.8646	0.5877	0.0125	5.1851	2.6462	0.6041
	4	5.67	13.6359	9.0522	4.5836	0.5602	3.6756	0.5295	0.0149	5.3465	2.6306	0.7025
	4	5.67	13.4456	8.8629	4.5826	0.5826	3.4508	0.4677	0.0174	5.4733	2.5841	0.8013
	4	5.67	13.1738	8.604	4.5698	0.6012	3.1924	0.4037	0.02	5.5619	2.5047	0.8955
	4	5.67	12.8267	8.2784	4.5482	0.6154	2.9047	0.3397	0.0224	5.6102	2.3921	0.9806
	4	5.67	12.4082	7.8907	4.5175	0.6246	2.5951	0.2777	0.0246	5.6174	2.2484	1.0532
	4	5.67	11.9198	7.4452	4.4746	0.6286	2.274	0.2198	0.0264	5.5839	2.0783	1.1113
	4	5.67	11.3593	6.9465	4.4127	0.6275	1.9543	0.1678	0.0278	5.5113	1.8896	1.1541
	4	5.67	10.7207	6.3998	4.3209	0.6216	1.6492	0.123	0.0288	5.4026	1.6922	1.1819
	4	5.67	7.3115	2.5074	4.8041	0.64	0.0033	0.146	0.0283	5.2626	0.0151	1.1793
	4	5.67	7.0143	2.4308	4.5835	0.6485	0.0007	0.1836	0.0262	4.9887	0.0004	1.1382
	4	5.67	6.5504	2.2908	4.2596	0.6351	0.0131	0.2093	0.0228	4.559	0.0077	1.0608
	4	5.67	5.8911	2.0503	3.8408	0.5992	0.0391	0.2145	0.0184	3.942	0.0373	0.9532
	4	5.67	1.8988	0.4596	1.4392	0.5961	0.0473	0.1954	0.0127	0.0039	0.0556	0.9078
	4	5.67	1.843	0.3953	1.4478	0.6128	0.0449	0.1708	0.007	0.0078	0.0643	0.8928
	4	5.67	1.775	0.3291	1.4459	0.6291	0.0421	0.1456	0.0029	0.0133	0.0744	0.8746
	4	5.67	1.7002	0.2642	1.436	0.6444	0.0392	0.1203	0.0004	0.0208	0.0856	0.8529
	4	5.67	1.6229	0.2023	1.4207	0.6582	0.0361	0.0954	0.0003	0.0304	0.0984	0.8275
	4	5.67	1.5469	0.1458	1.4011	0.6695	0.0328	0.0715	0.0028	0.0422	0.1125	0.7981
	4	5.67	1.4747	0.0958	1.3789	0.6776	0.0294	0.0497	0.0087	0.0566	0.128	0.7647
	4	5.67	1.4106	0.0557	1.355	0.6816	0.0258	0.0307	0.018	0.0736	0.1446	0.7274
	4	5.67	1.3556	0.0253	1.3303	0.6807	0.0223	0.0155	0.0315	0.0932	0.1623	0.6864
	4	5.67	1.3115	0.0062	1.3053	0.6744	0.0188	0.0051	0.049	0.1154	0.1805	0.6421
	4	5.67	1.2805	0.0002	1.2803	0.6623	0.0154	0.0003	0.0708	0.1402	0.199	0.5951
	4	5.67	1.2629	0.007	1.256	0.6443	0.0122	0.0015	0.0963	0.1673	0.2171	0.546
	4	5.67	1.26	0.0277	1.2323	0.6206	0.0093	0.0091	0.1254	0.1965	0.2346	0.4958
	4	5.67	1.2716	0.0624	1.2092	0.5919	0.0068	0.0229	0.1573	0.2274	0.2507	0.4453
	4	5.67	1.2979	0.1113	1.1865	0.559	0.0046	0.0425	0.1916	0.2596	0.2653	0.3955
	4	5.67	1.3379	0.1737	1.1642	0.5231	0.0029	0.0671	0.227	0.2927	0.2776	0.3473
	4	5.67	1.3906	0.2488	1.1418	0.4854	0.0015	0.0958	0.2633	0.3263	0.288	0.3015
	4	5.67	1.4539	0.3351	1.1188	0.447	0.0007	0.1276	0.2994	0.36	0.2959	0.2588
	4	5.67	1.525	0.431	1.094	0.4092	0.0002	0.1613	0.3349	0.3932	0.3018	0.2196
	4	5.67	1.6003	0.5337	1.0667	0.3727	0	0.1962	0.3691	0.4257	0.3055	0.1842
	4	5.67	1.6754	0.64	1.0354	0.3383	0.0002	0.2313	0.4019	0.4571	0.3075	0.1528
	4	5.67	1.7441	0.746	0.9982	0.3063	0.0006	0.2659	0.4327	0.4871	0.3078	0.1252
	4	5.67	1.8016	0.8397	0.9619	0.2808	0.0013	0.2964	0.4565	0.5197	0.3093	0.1035
	4	5.67	1.8573	0.8579	0.9994	0.289	0.0026	0.2967	0.4311	0.5893	0.3311	0.1033
	4	5.67	1.8912	0.8667	1.0245	0.293	0.0044	0.294	0.4007	0.6594	0.3496	0.1015
	4	5.67	1.9052	0.8652	1.0399	0.2914	0.0069	0.2878	0.3656	0.725	0.3625	0.0978
	4	5.67	1.8997	0.853	1.0466	0.2835	0.0098	0.2781	0.3265	0.7807	0.3679	0.0923
	4	5.67	1.8746	0.8297	1.0449	0.2693	0.013	0.2649	0.2847	0.8216	0.3649	0.085
	4	5.67	1.8286	0.7943	1.0343	0.2496	0.0162	0.2487	0.2418	0.8447	0.3535	0.0765
	4	5.67	1.7599	0.7472	1.0127	0.226	0.0192	0.2302	0.1997	0.8489	0.3349	0.0672
	4	5.67	1.665	0.6881	0.9769	0.2005	0.0217	0.2103	0.1602	0.8357	0.3112	0.0577
	4	5.67	1.6135	0.6381	0.9755	0.1977	0.0266	0.1951	0.145	0.8164	0.2964	0.0535
	4	5.67	1.6044	0.5975	1.0068	0.2148	0.0354	0.1818	0.1486	0.7897	0.2894	0.0538
	4	5.67	1.568	0.5474	1.0206	0.2246	0.0449	0.1645	0.148	0.7455	0.2773	0.0531
	4	5.67	1.5073	0.4895	1.0178	0.2251	0.054	0.1438	0.1427	0.6846	0.26	0.0513
	4	5.67	1.4226	0.4264	0.9962	0.2162	0.0616	0.1213	0.1332	0.6105	0.2387	0.0486
	4	5.67	1.313	0.3604	0.9526	0.2001	0.0671	0.0986	0.1205	0.5289	0.2143	0.0451
	5	5.67	3.8374	2.5576	1.2798	0.103	1.1788	0.0605	0.2729	1.0663	1.2036	0.0087
	5	5.67	4.2001	2.7291	1.4709	0.1474	1.3651	0.1048	0.2216	1.0898	1.367	0.0043
	5	5.67	4.5199	2.8013	1.7186	0.1967	1.5256	0.1617	0.1651	1.078	1.4878	0.0573
	5	5.67	4.7968	2.7848	2.012	0.2423	1.6425	0.2284	0.1093	1.0308	1.5466	0.1721
	5	5.67	5.0092	2.6875	2.3217	0.2756	1.7063	0.2997	0.0612	0.9534	1.5371	0.3351
	5	5.67	5.1139	2.5105	2.6034	0.2926	1.715	0.3701	0.0266	0.8551	1.4645	0.523
	5	5.67	4.9546	2.3984	2.5562	0.3156	1.6756	0.3646	0.0223	0.8042	1.3828	0.5498
	5	5.67	4.7289	2.2783	2.4506	0.3425	1.6284	0.3498	0.0203	0.7561	1.298	0.5578
	5	5.67	4.4685	2.1415	2.327	0.3718	1.5751	0.3339	0.0182	0.7047	1.2079	0.5653
	5	5.67	4.1851	1.9926	2.1925	0.4036	1.5151	0.3168	0.0161	0.65	1.1125	0.572
	5	5.67	3.8883	1.8353	2.053	0.4378	1.4483	0.2986	0.0139	0.5925	1.0126	0.5775
	5	5.67	3.5859	1.6733	1.9126	0.4743	1.3748	0.2792	0.0118	0.5326	0.9088	0.5816
	5	5.67	3.2845	1.5094	1.7751	0.5128	1.2946	0.2589	0.0097	0.4709	0.8022	0.5837
	5	5.67	2.9893	1.3456	1.6437	0.5528	1.2081	0.2377	0.0077	0.4084	0.6943	0.5835
	5	5.67	2.7051	1.1849	1.5201	0.594	1.1162	0.2159	0.0058	0.346	0.5868	0.5806
	5	5.67	2.4355	1.0294	1.4061	0.6356	1.0197	0.1937	0.0041	0.285	0.4818	0.5746
	5	5.67	2.1838	0.8802	1.3036	0.6771	0.9199	0.1714	0.0027	0.2267	0.3816	0.5652
	5	5.67	1.9531	0.7399	1.2133	0.7178	0.8183	0.1494	0.0015	0.1726	0.2888	0.5523
	5	5.67	1.7452	0.609	1.1362	0.757	0.7167	0.1279	0.0007	0.1242	0.2058	0.5358
	5	5.67	1.5625	0.4893	1.0732	0.7941	0.6169	0.1073	0.0002	0.0826	0.135	0.5157
	5	5.67	1.4061	0.3813	1.0248	0.8286	0.5209	0.088	0.0001	0.049	0.0782	0.4923
	5	5.67	1.2775	0.2864	0.9911	0.86	0.4305	0.0703	0.0003	0.0239	0.0366	0.4661
	5	5.67	1.1772	0.2048	0.9724	0.8882	0.3474	0.0545	0.0009	0.0078	0.0107	0.4377
	5	5.67	1.1056	0.137	0.9686	0.9128	0.2727	0.0406	0.0019	0.0005	0.0003	0.4078
	5	5.67	1.062	0.0829	0.9791	0.9338	0.2075	0.0289	0.0032	0.0015	0.0045	0.3771
	5	5.67	1.0463	0.043	1.0033	0.9512	0.1521	0.0193	0.0047	0.0101	0.0218	0.3463
	5	5.67	1.0563	0.0165	1.0398	0.9651	0.1063	0.0118	0.0064	0.0254	0.0506	0.3162
	5	5.67	1.0894	0.0024	1.0869	0.9757	0.0699	0.0063	0.0083	0.0462	0.0889	0.2874
	5	5.67	1.1426	0.0007	1.1418	0.9832	0.0422	0.0026	0.0104	0.0715	0.1348	0.2601
	5	5.67	1.2104	0.0092	1.2013	0.9879	0.0223	0.0006	0.0125	0.1004	0.1866	0.2348
	5	5.67	1.2866	0.0264	1.2603	0.9902	0.0093	0	0.0147	0.1317	0.2427	0.2116
	5	5.67	1.3475	0.0503	1.2972	0.9783	0.0028	0.0007	0.017	0.1655	0.2907	0.1934
	5	5.67	1.3346	0.0787	1.2559	0.9099	0.0009	0.0042	0.0203	0.2066	0.2935	0.1855
	5	5.67	1.3082	0.1143	1.194	0.828	0.0001	0.0109	0.0238	0.2514	0.2913	0.1741
	5	5.67	1.2731	0.1552	1.1179	0.7342	0.0005	0.0211	0.0273	0.2971	0.2837	0.1595
	5	5.67	1.2316	0.1992	1.0323	0.6313	0.0022	0.0343	0.0303	0.3398	0.2706	0.1421
	5	5.67	1.1844	0.2439	0.9406	0.5241	0.0053	0.0493	0.0327	0.3754	0.2525	0.1229
	5	5.67	1.1299	0.2854	0.8445	0.4187	0.0095	0.0644	0.0342	0.4008	0.2308	0.1031
	5	5.67	1.0646	0.3197	0.7449	0.3214	0.0146	0.0784	0.035	0.4145	0.207	0.0841
	5	5.67	3.3826	0.8077	2.5748	0.291	0.0151	0.1268	0.0415	0.4447	0.2118	2.2986
	5	5.67	3.6959	0.9546	2.7413	0.2823	0.0134	0.211	0.0518	0.4833	0.2275	2.4751
	5	5.67	3.9888	1.1019	2.8868	0.2688	0.0116	0.3196	0.0629	0.5173	0.239	2.6197
	5	5.67	4.2582	1.2463	3.0118	0.2502	0.0097	0.4502	0.0742	0.5434	0.2445	2.7243
	5	5.67	4.4963	1.382	3.1144	0.2267	0.0078	0.5973	0.0848	0.5587	0.2424	2.7845
	5	5.67	4.6912	1.5037	3.1875	0.1996	0.006	0.7536	0.0941	0.5613	0.2329	2.7999
	5	5.67	4.826	1.606	3.2201	0.1706	0.0044	0.9108	0.1015	0.5507	0.2173	2.7726
	5	5.67	4.8772	1.6849	3.1923	0.1418	0.003	1.0612	0.1067	0.5283	0.1977	2.7073
	5	5.67	4.7848	1.6465	3.1383	0.1373	0.0027	1.0418	0.0958	0.5439	0.1983	2.6607
	5	5.67	4.6471	1.5945	3.0526	0.1322	0.0023	1.0192	0.0847	0.5601	0.1986	2.6064
	5	5.67	4.4756	1.5312	2.9443	0.1266	0.0019	0.9932	0.0737	0.5766	0.1985	2.5435
	5	5.67	4.2794	1.4592	2.8202	0.1204	0.0015	0.9633	0.0625	0.5929	0.198	2.4715
	5	5.67	4.0657	1.3801	2.6855	0.1138	0.0012	0.9293	0.0517	0.6088	0.1969	2.3898
	5	5.67	3.8402	1.2958	2.5444	0.1067	0.0008	0.8909	0.0412	0.6239	0.1952	2.2979
	5	5.67	3.6078	1.2072	2.4006	0.0991	0.0005	0.8481	0.0314	0.6375	0.1928	2.1956
	5	5.67	3.3726	1.1158	2.2567	0.0911	0.0003	0.8009	0.0224	0.649	0.1896	2.083
	5	5.67	3.1373	1.0228	2.1145	0.0827	0.0001	0.7494	0.0147	0.658	0.1856	1.9603
	5	5.67	2.9053	0.9297	1.9756	0.0742	0	0.694	0.0083	0.6638	0.1807	1.8282
	5	5.67	2.6782	0.8367	1.8416	0.0655	0	0.6354	0.0037	0.6659	0.1749	1.6878
	5	5.67	2.459	0.7461	1.7129	0.0569	0.0001	0.5744	0.0009	0.6639	0.1682	1.5405
	5	5.67	2.2484	0.6573	1.5911	0.0485	0.0003	0.5119	0.0001	0.6577	0.1607	1.3882
	5	5.67	2.0485	0.5724	1.4761	0.0405	0.0006	0.4491	0.0014	0.647	0.1524	1.2336
	5	5.67	1.86	0.4912	1.3688	0.033	0.001	0.3875	0.0049	0.6322	0.1435	1.0795
	5	5.67	1.6842	0.4149	1.2693	0.0261	0.0015	0.3281	0.0104	0.6136	0.1342	0.929
	5	5.67	1.5217	0.3439	1.1779	0.02	0.0021	0.2724	0.0181	0.5917	0.1247	0.7854
	5	5.67	1.3733	0.2788	1.0945	0.0147	0.0027	0.2213	0.0274	0.5672	0.115	0.6514
	5	5.67	1.2394	0.2202	1.0192	0.0103	0.0034	0.1756	0.0384	0.5408	0.1055	0.5296
	5	5.67	1.1201	0.1686	0.9515	0.0067	0.0041	0.1357	0.0507	0.5132	0.0962	0.4215
	5	5.67	1.0153	0.1237	0.8916	0.004	0.0049	0.1019	0.0641	0.4851	0.0872	0.3279
	5	5.67	0.9244	0.0861	0.8384	0.002	0.0056	0.0738	0.0782	0.4571	0.0788	0.2487
	5	5.67	0.8467	0.0557	0.791	0.0008	0.0063	0.0512	0.0929	0.4297	0.0709	0.1831
	5	5.67	0.7808	0.0322	0.7485	0.0002	0.0071	0.0336	0.1078	0.4032	0.0636	0.1302
	5	5.67	0.7246	0.0156	0.709	0.0001	0.0077	0.0203	0.1228	0.378	0.0568	0.0885
	5	5.67	0.8577	0.0068	0.8508	0.0001	0.0091	0.0118	0.1352	0.3528	0.0491	0.2168
	5	5.67	0.837	0.0165	0.8206	0	0.0124	0.0069	0.1422	0.3235	0.0378	0.2269
	5	5.67	0.8148	0.0319	0.783	0.0002	0.0164	0.0029	0.1494	0.2925	0.027	0.237
	5	5.67	0.7942	0.0538	0.7404	0.0009	0.0213	0.0005	0.1568	0.2603	0.0172	0.247
	5	5.67	0.7772	0.0825	0.6947	0.002	0.027	0.0002	0.1641	0.2272	0.0091	0.2566
	5	5.67	0.7664	0.1188	0.6476	0.0038	0.0336	0.0022	0.1713	0.194	0.0032	0.2655
	5	5.67	0.7628	0.1631	0.5997	0.0061	0.041	0.0071	0.1782	0.1612	0.0003	0.2734
	5	5.67	0.7678	0.2153	0.5525	0.0091	0.0492	0.0152	0.1846	0.1299	0.0009	0.28
	5	5.67	0.7816	0.2758	0.5059	0.0127	0.0579	0.0264	0.1905	0.1006	0.0054	0.2849
	5	5.67	0.8044	0.3435	0.4609	0.0169	0.0669	0.0406	0.1956	0.0742	0.0139	0.2881
	5	5.67	0.8357	0.4177	0.418	0.0214	0.0761	0.0574	0.1999	0.0513	0.0261	0.2893
	5	5.67	0.8743	0.4969	0.3773	0.0264	0.085	0.076	0.2032	0.0324	0.0415	0.2886
	5	5.67	0.9185	0.5796	0.3389	0.0315	0.0936	0.0957	0.2055	0.0179	0.0595	0.2859
	5	5.67	0.9653	0.6626	0.3027	0.0367	0.1015	0.1156	0.2069	0.0077	0.0791	0.2815
	5	5.67	1.0117	0.7424	0.2693	0.0418	0.1086	0.1351	0.2073	0.0018	0.0995	0.2757
	5	5.67	1.0531	0.8151	0.238	0.0467	0.1148	0.1535	0.2068	0	0.1202	0.2685
	5	5.67	1.0532	0.8246	0.2286	0.0493	0.1111	0.1593	0.1894	0.0003	0.1203	0.2799
	5	5.67	1.0085	0.7678	0.2407	0.0494	0.0968	0.1521	0.1543	0.0003	0.0998	0.3115
	5	5.67	0.9532	0.6978	0.2555	0.0491	0.0813	0.1429	0.1186	0.0003	0.079	0.3423
	5	5.67	0.8927	0.6183	0.2744	0.0482	0.0652	0.1318	0.0843	0.0003	0.0587	0.3691
	5	5.67	0.8312	0.5331	0.2981	0.0468	0.0492	0.119	0.0534	0.0003	0.0401	0.3887
	5	5.67	0.7726	0.446	0.3265	0.0447	0.0343	0.105	0.0283	0.0003	0.0242	0.3988
	5	5.67	0.7201	0.3605	0.3596	0.0421	0.0215	0.0903	0.0106	0.0002	0.0119	0.3981
	5	5.67	0.6757	0.2799	0.3958	0.039	0.0115	0.0756	0.0014	0.0002	0.0038	0.3873
	5	5.67	0.6403	0.2075	0.4327	0.0357	0.0046	0.0616	0.0007	0.0002	0.0003	0.3683
	5	5.67	0.6127	0.145	0.4677	0.0322	0.001	0.0488	0.0076	0.0001	0.0008	0.3439
	5	5.67	0.5896	0.0941	0.4955	0.0287	0.0002	0.0375	0.0204	0.0001	0.005	0.3166
	5	5.67	0.533	0.0505	0.4824	0.0216	0.0036	0.0293	0.0303	0.001	0.0093	0.2636
	5	5.67	0.4819	0.0178	0.4641	0.0145	0.0144	0.0215	0.0416	0.0071	0.0148	0.2071
	5	5.67	0.4485	0.0011	0.4474	0.0083	0.0336	0.0143	0.0552	0.0196	0.022	0.1519
	5	5.67	0.4395	0.0049	0.4346	0.0035	0.0621	0.0082	0.071	0.0394	0.0307	0.101
	5	5.67	0.4597	0.0315	0.4282	0.0006	0.1003	0.0035	0.0887	0.0665	0.0411	0.0574
	5	5.67	0.5133	0.0837	0.4296	0.0001	0.1475	0.0007	0.1078	0.101	0.0529	0.0246
	5	5.67	0.6003	0.1613	0.4391	0.002	0.2023	0	0.1277	0.1418	0.0657	0.0052
	5	5.67	0.7194	0.2623	0.457	0.0063	0.2625	0.0015	0.1476	0.1876	0.0794	0.0002
	5	5.67	0.8656	0.3834	0.4822	0.0128	0.3256	0.005	0.1669	0.2368	0.0933	0.0092
	5	5.67	1.0316	0.5195	0.5121	0.0208	0.3893	0.0101	0.185	0.2877	0.1072	0.0302
	5	5.67	1.2076	0.6638	0.5438	0.0297	0.4513	0.0165	0.2014	0.3385	0.1206	0.0607
	5	5.67	1.3552	0.7889	0.5663	0.0388	0.5017	0.0229	0.2144	0.3802	0.1313	0.0913
	5	5.67	1.3885	0.83	0.5586	0.0472	0.518	0.0257	0.2212	0.3908	0.1335	0.0992
	5	5.67	1.415	0.8693	0.5458	0.057	0.5348	0.029	0.2282	0.4016	0.1357	0.1078
	5	5.67	1.4364	0.9069	0.5295	0.0684	0.5518	0.0327	0.2352	0.4125	0.1377	0.1172
	5	5.67	1.4542	0.9432	0.511	0.0815	0.5688	0.0369	0.2421	0.4232	0.1395	0.1273
	5	5.67	1.4694	0.978	0.4913	0.0966	0.5854	0.0415	0.2488	0.4336	0.1409	0.1382
	5	5.67	1.483	1.0117	0.4713	0.1137	0.6012	0.0466	0.2548	0.4433	0.142	0.1498
	5	5.67	1.4958	1.0443	0.4515	0.1327	0.6156	0.0522	0.2599	0.4518	0.1426	0.1619
	5	5.67	1.5085	1.0759	0.4326	0.1538	0.6282	0.0581	0.2639	0.4589	0.1426	0.1745
	5	5.67	1.5211	1.1063	0.4148	0.1766	0.6385	0.0644	0.2663	0.4642	0.1419	0.1874
	5	5.67	1.5343	1.1356	0.3987	0.201	0.6459	0.0709	0.2668	0.4671	0.1405	0.2003
	5	5.67	1.5481	1.1638	0.3843	0.2267	0.6501	0.0774	0.2654	0.4674	0.1382	0.2131
	5	5.67	1.5621	1.1903	0.3718	0.2532	0.6507	0.0837	0.2617	0.4648	0.1351	0.2254
	5	5.67	1.577	1.2157	0.3613	0.2801	0.6475	0.0898	0.2558	0.4591	0.1312	0.237
	5	5.67	1.5919	1.2388	0.3531	0.3068	0.6405	0.0953	0.2477	0.4502	0.1265	0.2478
	5	5.67	1.6068	1.2596	0.3472	0.3329	0.6299	0.1	0.2378	0.4384	0.1212	0.2575
	5	5.67	1.6211	1.2777	0.3434	0.358	0.6158	0.104	0.2262	0.4238	0.1153	0.266
	5	5.67	1.6343	1.2925	0.3418	0.3817	0.5988	0.1071	0.2135	0.4069	0.109	0.2731
	5	5.67	1.6456	1.3036	0.342	0.4036	0.5793	0.1092	0.2001	0.3882	0.1025	0.279
	5	5.67	1.6537	1.3094	0.3442	0.4236	0.5578	0.1104	0.1863	0.3683	0.0958	0.2835
	5	5.67	1.6578	1.3103	0.3475	0.4415	0.535	0.1109	0.1725	0.3478	0.0892	0.2867
	5	5.67	1.6569	1.3051	0.3518	0.4572	0.5115	0.1106	0.1592	0.3271	0.0828	0.2888
	5	5.67	1.6488	1.2926	0.3562	0.4709	0.4876	0.1098	0.1463	0.3066	0.0766	0.2899
	5	5.67	1.6321	1.2725	0.3596	0.4825	0.4639	0.1086	0.1343	0.2868	0.0707	0.29
	5	5.67	1.6047	1.2435	0.3612	0.4921	0.4407	0.1069	0.1231	0.268	0.0652	0.2893
	5	5.67	1.6394	1.2703	0.3691	0.5154	0.4438	0.1163	0.127	0.256	0.0609	0.2947
	5	5.67	1.7428	1.3574	0.3854	0.5549	0.4732	0.1395	0.1468	0.2485	0.057	0.3061
	5	5.67	1.8427	1.4404	0.4022	0.5955	0.5024	0.1658	0.1685	0.2386	0.0523	0.3163
	5	5.67	1.9385	1.5177	0.4208	0.6364	0.5303	0.1945	0.1916	0.2262	0.047	0.3245
	5	5.67	2.0293	1.5876	0.4417	0.6767	0.5557	0.2243	0.2155	0.2112	0.0412	0.3302
	5	5.67	2.1145	1.6489	0.4656	0.7154	0.5771	0.2539	0.2391	0.1938	0.0349	0.3327
	5	5.67	2.1923	1.6997	0.4926	0.7513	0.5932	0.2812	0.2614	0.1744	0.0285	0.3315
	5	5.67	2.261	1.7386	0.5223	0.7836	0.6028	0.3049	0.2813	0.1537	0.0222	0.3266
	5	5.67	2.3186	1.7642	0.5544	0.8114	0.6052	0.3236	0.2981	0.1325	0.0165	0.3179
	5	5.67	2.3621	1.7745	0.5875	0.8339	0.6002	0.3368	0.3112	0.1116	0.0115	0.306
	5	5.67	2.3878	1.7681	0.6198	0.8506	0.5881	0.3447	0.3202	0.092	0.0074	0.2913
	5	5.67	2.3909	1.743	0.6478	0.8613	0.5699	0.3476	0.3252	0.0741	0.0043	0.2747
	5	5.67	2.3646	1.6965	0.6681	0.8659	0.5471	0.3465	0.3268	0.0584	0.0022	0.257
	5	5.67	2.6611	1.8855	0.7756	0.9068	0.5987	0.4237	0.4398	0.053	0.0001	0.2413
	5	5.67	2.9431	2.0477	0.8954	0.9341	0.6454	0.5045	0.5694	0.0466	0.0031	0.2196
	5	5.67	3.2014	2.1741	1.0273	0.9433	0.6839	0.5806	0.7067	0.0394	0.0119	0.1923
	5	5.67	3.4246	2.2557	1.1688	0.9316	0.7118	0.6421	0.8407	0.032	0.0264	0.1612
	5	5.67	3.5981	2.2844	1.3137	0.8986	0.7281	0.6799	0.9604	0.0247	0.0462	0.1289
	5	5.67	3.7028	2.2507	1.452	0.8462	0.7331	0.6886	1.0574	0.0181	0.0701	0.098
	5	5.67	3.7109	2.142	1.569	0.7795	0.728	0.6685	1.1259	0.0124	0.0965	0.0708
	5	5.67	3.7224	2.0863	1.6361	0.7244	0.7344	0.737	1.1633	0.0051	0.1145	0.0636
	5	5.67	3.6959	2.0028	1.6931	0.6617	0.7329	0.8075	1.1923	0.0007	0.1346	0.0559
	5	5.67	3.641	1.8956	1.7454	0.592	0.7218	0.8772	1.21	0.0005	0.1561	0.0478
	5	5.67	3.5667	1.7708	1.7959	0.5165	0.7	0.9429	1.2144	0.0052	0.1782	0.0396
	5	5.67	3.4788	1.6318	1.8469	0.4374	0.6673	1.001	1.2043	0.0154	0.1994	0.0316
	5	5.67	3.3823	1.4839	1.8984	0.3577	0.6243	1.0482	1.1792	0.0312	0.2184	0.024
	5	5.67	3.2803	1.3314	1.9489	0.2809	0.5729	1.082	1.1402	0.0519	0.2337	0.0172
	5	5.67	3.1732	1.1782	1.995	0.2105	0.5156	1.1009	1.0889	0.0764	0.2445	0.0114
	5	5.67	3.0586	1.0281	2.0305	0.1494	0.4556	1.1048	1.0278	0.1033	0.2504	0.0068
	5	5.67	2.9307	0.8844	2.0463	0.0993	0.3961	1.0947	0.9601	0.131	0.2517	0.0034
	5	5.67	2.8236	0.7874	2.0363	0.0693	0.3498	1.0883	0.9087	0.1513	0.2486	0.0019
	5	5.67	2.8688	0.8418	2.027	0.0792	0.3457	1.1425	0.9369	0.1428	0.2419	0.0032
	5	5.67	2.8922	0.8923	1.9999	0.0905	0.3411	1.2016	0.9667	0.1339	0.2346	0.0049
	5	5.67	2.8998	0.9402	1.9596	0.1034	0.3359	1.2659	0.9981	0.1246	0.2267	0.0072
	5	5.67	2.8966	0.9863	1.9103	0.118	0.3301	1.3354	1.0308	0.1149	0.2182	0.0102
	5	5.67	2.8865	1.0315	1.855	0.1345	0.3236	1.4097	1.0648	0.1048	0.209	0.0138
	5	5.67	2.8723	1.0768	1.7955	0.1531	0.3164	1.4882	1.0998	0.0944	0.1992	0.0183
	5	5.67	2.8563	1.1223	1.734	0.1739	0.3084	1.5701	1.1353	0.0838	0.1887	0.0237
	5	5.67	2.8407	1.1692	1.6715	0.1971	0.2997	1.6541	1.1711	0.0731	0.1776	0.03
	5	5.67	2.8268	1.2173	1.6095	0.2227	0.2901	1.7386	1.2065	0.0625	0.1659	0.0375
	5	5.67	2.8159	1.2671	1.5488	0.2507	0.2798	1.822	1.2411	0.052	0.1537	0.0461
	5	5.67	2.8086	1.3186	1.49	0.2812	0.2686	1.9022	1.2744	0.042	0.1411	0.0559
	5	5.67	2.8057	1.3724	1.4332	0.3141	0.2566	1.9776	1.3056	0.0325	0.1281	0.067
	5	5.67	2.8081	1.429	1.3792	0.3491	0.2438	2.0463	1.3342	0.0238	0.115	0.0794
	5	5.67	2.8159	1.4878	1.3281	0.386	0.2304	2.1068	1.3597	0.0162	0.1019	0.093
	5	5.67	2.8293	1.549	1.2804	0.4244	0.2164	2.1576	1.3815	0.0099	0.0889	0.1078
	5	5.67	2.849	1.613	1.236	0.4638	0.2019	2.1978	1.3992	0.0049	0.0762	0.1237
	5	5.67	2.8748	1.6801	1.1947	0.5038	0.1872	2.2266	1.4124	0.0017	0.064	0.1407
	5	5.67	2.9064	1.7494	1.157	0.5439	0.1722	2.2435	1.4208	0.0001	0.0526	0.1585
	5	5.67	2.9441	1.8215	1.1226	0.5835	0.1573	2.2484	1.4243	0.0004	0.042	0.1769
	5	5.67	2.9877	1.8961	1.0916	0.6221	0.1425	2.2415	1.4227	0.0026	0.0325	0.1959
	5	5.67	3.0365	1.9725	1.064	0.6593	0.1281	2.2233	1.4161	0.0065	0.0242	0.2152
	5	5.67	3.0905	2.0505	1.0399	0.6946	0.1142	2.1946	1.4047	0.0121	0.0171	0.2346
	5	5.67	3.1483	2.1298	1.0186	0.7277	0.101	2.1566	1.3885	0.0192	0.0112	0.2538
	5	5.67	3.2098	2.2097	1.0001	0.7585	0.0885	2.1103	1.368	0.0276	0.0067	0.2728
	5	5.67	3.2737	2.2889	0.9847	0.7865	0.0768	2.0573	1.3435	0.0372	0.0034	0.2913
	5	5.67	3.3386	2.3671	0.9716	0.8119	0.0661	1.9989	1.3155	0.0477	0.0012	0.3092
	5	5.67	3.4027	2.4423	0.9604	0.8344	0.0564	1.9368	1.2845	0.0588	0.0002	0.3263
	5	5.67	3.464	2.5132	0.9508	0.8541	0.0476	1.8722	1.251	0.0704	0.0002	0.3426
	5	5.67	3.5203	2.5778	0.9425	0.8712	0.0398	1.8065	1.2157	0.0823	0.001	0.358
	5	5.67	3.5677	2.6335	0.9342	0.8856	0.0329	1.7408	1.1792	0.0943	0.0025	0.3724
	5	5.67	3.6029	2.6776	0.9253	0.8976	0.0269	1.676	1.1419	0.1063	0.0047	0.3858
	5	5.67	3.6208	2.7065	0.9143	0.9074	0.0217	1.6129	1.1046	0.118	0.0074	0.3983
	5	5.67	3.616	2.7161	0.8999	0.9151	0.0172	1.5521	1.0675	0.1296	0.0105	0.4098
	5	5.67	3.5811	2.701	0.88	0.9209	0.0135	1.4939	1.0313	0.1407	0.0139	0.4203
	5	5.67	3.6173	2.7355	0.8818	0.9195	0.012	1.4839	1.0248	0.1512	0.0166	0.4597
	5	5.67	3.6941	2.7976	0.8965	0.9104	0.0118	1.5007	1.0356	0.1619	0.0187	0.5245
	5	5.67	3.746	2.8392	0.9067	0.8961	0.0115	1.511	1.0432	0.1732	0.0211	0.5965
	5	5.67	3.7784	2.8624	0.916	0.8757	0.0111	1.5127	1.0467	0.1846	0.0237	0.6751
	5	5.67	3.795	2.869	0.926	0.8483	0.0107	1.5034	1.0452	0.1961	0.0265	0.7596
	5	5.67	3.7993	2.8608	0.9385	0.8137	0.0101	1.4811	1.0378	0.2073	0.0294	0.8487
	5	5.67	3.7928	2.8383	0.9546	0.7715	0.0094	1.4441	1.0238	0.2178	0.0324	0.9407
	5	5.67	3.7773	2.802	0.9753	0.7219	0.0086	1.3911	1.0026	0.2272	0.0353	1.0338
	5	5.67	3.7543	2.7531	1.0012	0.6656	0.0078	1.3216	0.9741	0.2352	0.0382	1.1259
	5	5.67	3.7238	2.6915	1.0322	0.6039	0.0069	1.2364	0.9383	0.2415	0.0408	1.2151
	5	5.67	3.6855	2.6173	1.0682	0.5385	0.006	1.1372	0.8956	0.2458	0.0431	1.2997
	5	5.67	3.6394	2.5309	1.1085	0.4716	0.005	1.0272	0.847	0.2481	0.0451	1.378
	5	5.67	3.5844	2.4324	1.152	0.4055	0.0042	0.9109	0.7936	0.2484	0.0466	1.4491
	5	5.67	3.5182	2.3215	1.1967	0.3425	0.0034	0.7935	0.7369	0.2468	0.0477	1.5121
	5	5.67	3.4398	2.1995	1.2404	0.2843	0.0027	0.6806	0.6787	0.2436	0.0483	1.5665
	5	5.67	3.3458	2.0667	1.2792	0.2322	0.0021	0.5763	0.6207	0.239	0.0486	1.6124
	5	5.67	3.2325	1.9232	1.3093	0.1868	0.0016	0.4834	0.5644	0.2333	0.0485	1.6497
	5	5.67	3.1124	1.8047	1.3077	0.1595	0.0011	0.449	0.5239	0.2128	0.0493	1.6482
	5	5.67	2.9661	1.6876	1.2784	0.1399	0.0006	0.4463	0.489	0.181	0.0504	1.6153
	5	5.67	2.7902	1.5519	1.2383	0.1191	0.0002	0.4414	0.4491	0.1479	0.0513	1.5696
	5	5.67	2.594	1.4021	1.1919	0.0977	0	0.4339	0.4047	0.1147	0.0517	1.5099
	5	5.67	2.3866	1.244	1.1426	0.0764	0.0001	0.4237	0.3565	0.0825	0.0518	1.436
	5	5.67	2.1752	1.0817	1.0935	0.056	0.0005	0.4107	0.3056	0.0533	0.0513	1.3482
	5	5.67	1.9666	0.9205	1.046	0.0377	0.0012	0.395	0.2539	0.0291	0.0502	1.2479
	5	5.67	1.7664	0.7645	1.0018	0.0224	0.0022	0.3767	0.2031	0.0115	0.0484	1.1372
	5	5.67	1.5795	0.6177	0.9618	0.0108	0.0034	0.3562	0.1556	0.0019	0.0462	1.0194
	5	5.67	1.4098	0.4839	0.9259	0.0034	0.0049	0.334	0.1131	0.0005	0.0435	0.8984
	5	5.67	1.2594	0.3655	0.8939	0.0002	0.0066	0.3107	0.0771	0.0067	0.0405	0.7785
	5	5.67	1.1294	0.2645	0.8649	0.0008	0.0083	0.2868	0.0484	0.0194	0.0372	0.6635
	5	5.67	1.0186	0.1819	0.8367	0.0047	0.01	0.2629	0.0271	0.0368	0.0339	0.5569
	5	5.67	0.9238	0.1173	0.8065	0.0112	0.0116	0.2395	0.0125	0.0573	0.0307	0.4609
	5	5.67	0.8988	0.1079	0.7909	0.0115	0.0151	0.2075	0.0073	0.0473	0.0416	0.4733
	5	5.67	0.8861	0.1097	0.7764	0.0098	0.0197	0.1724	0.0039	0.0306	0.0595	0.5083
	5	5.67	0.8734	0.1111	0.7623	0.0079	0.0249	0.1375	0.0015	0.0164	0.0809	0.5375
	5	5.67	0.8633	0.1115	0.7518	0.0061	0.0304	0.1043	0.0002	0.0061	0.1051	0.5577
	5	5.67	0.8566	0.1107	0.7458	0.0043	0.0359	0.0741	0.0003	0.0007	0.1309	0.566
	5	5.67	0.8527	0.1084	0.7443	0.0028	0.041	0.0483	0.0017	0.0006	0.1571	0.561
	5	5.67	0.8481	0.1038	0.7444	0.0016	0.0455	0.0278	0.0044	0.0057	0.1825	0.5427
	5	5.67	0.8478	0.0989	0.7489	0.0009	0.0475	0.0137	0.0074	0.0145	0.203	0.5267
	5	5.67	0.9309	0.1088	0.8221	0.0008	0.0336	0.0089	0.0043	0.0201	0.1936	0.631
	5	5.67	1.0109	0.1166	0.8943	0.0007	0.0205	0.0047	0.0018	0.0268	0.1785	0.7385
	5	5.67	1.0889	0.1223	0.9666	0.0006	0.0098	0.0017	0.0003	0.0342	0.1576	0.8407
	5	5.67	1.1626	0.1252	1.0374	0.0005	0.0026	0.0001	0.0001	0.0421	0.1325	0.9287
	5	5.67	1.228	0.125	1.103	0.0004	0	0.0002	0.0014	0.05	0.1057	0.9953
	5	5.67	1.2772	0.1215	1.1558	0.0002	0.0019	0.0019	0.0039	0.0575	0.0798	1.0356
	6	5.67	6.4939	4.223	2.2709	0.6762	2.5976	1.4694	0.0348	0.1541	1.1188	0.0799
	6	5.67	7.1317	4.7372	2.3945	0.7378	3.0405	1.4768	0.032	0.2285	1.2458	0.0536
	6	5.67	7.6411	5.1453	2.4958	0.7912	3.4534	1.4574	0.0287	0.323	1.3575	0.0305
	6	5.67	8.038	5.4536	2.5844	0.8288	3.7961	1.4058	0.0252	0.4328	1.4419	0.0127
	6	5.67	8.325	5.6592	2.6658	0.8446	4.0523	1.3195	0.0214	0.5474	1.4919	0.0022
	6	5.67	8.4954	5.7549	2.7405	0.8353	4.2186	1.2006	0.0177	0.6537	1.5053	0.0004
	6	5.67	8.535	5.7311	2.804	0.8015	4.2968	1.0565	0.0141	0.7403	1.4841	0.0076
	6	5.67	8.4204	5.575	2.8455	0.7478	4.2913	0.8998	0.0108	0.7997	1.4335	0.0228
	6	5.67	8.1167	5.2716	2.8451	0.6811	4.2098	0.7444	0.0079	0.8297	1.3604	0.0444
	6	5.67	8.2335	5.4238	2.8097	0.6854	4.1936	0.8061	0.0095	0.9206	1.3535	0.0548
	6	5.67	8.3127	5.5847	2.728	0.6937	4.1509	0.8928	0.0118	1.0193	1.3419	0.0646
	6	5.67	8.302	5.691	2.611	0.6963	4.0635	0.9763	0.0144	1.1112	1.3146	0.075
	6	5.67	8.2104	5.7422	2.4683	0.6919	3.9275	1.051	0.0172	1.1909	1.2706	0.0856
	6	5.67	8.0428	5.7355	2.3074	0.6798	3.7401	1.1113	0.0201	1.254	1.2097	0.0961
	6	5.67	7.8018	5.6676	2.1342	0.6596	3.5006	1.1526	0.0228	1.2983	1.1333	0.1059
	6	5.67	7.4875	5.5354	1.9521	0.6314	3.2117	1.1725	0.0251	1.323	1.0441	0.1145
	6	5.67	7.0995	5.3352	1.7643	0.5962	2.882	1.1706	0.027	1.3289	0.946	0.1218
	6	5.67	6.6348	5.0626	1.5721	0.5556	2.5276	1.149	0.0284	1.3177	0.8439	0.1275
	6	5.67	6.0898	4.7142	1.3756	0.5117	2.1717	1.1116	0.0293	1.2923	0.7425	0.1317
	6	5.67	6.1202	5.2834	0.8368	0.5328	0.0065	1.2104	1.9845	1.4031	0.7057	0.1217
	6	5.67	6.4231	5.5076	0.9155	0.5513	0.0092	1.3028	2.1806	1.5154	0.6589	0.1106
	6	5.67	6.6716	5.6683	1.0033	0.5656	0.0127	1.3791	2.3749	1.6237	0.6012	0.0985
	6	5.67	6.8711	5.7692	1.1019	0.5746	0.0168	1.4308	2.5617	1.7213	0.5326	0.0858
	6	5.67	7.0249	5.8135	1.2114	0.5771	0.0214	1.4531	2.7361	1.8011	0.4547	0.0727
	6	5.67	7.1356	5.8043	1.3313	0.5727	0.0266	1.4447	2.8943	1.8561	0.3707	0.0597
	6	5.67	7.2031	5.744	1.4591	0.5612	0.032	1.4077	3.0336	1.8802	0.2858	0.0472
	6	5.67	7.2261	5.6353	1.5908	0.5433	0.0375	1.3464	3.152	1.8689	0.2061	0.0356
	6	5.67	7.1997	5.479	1.7207	0.5198	0.0428	1.2666	3.2483	1.8194	0.1373	0.0255
	6	5.67	7.1158	5.2759	1.84	0.4921	0.0478	1.1749	3.3219	1.7324	0.083	0.017
	6	5.67	6.959	5.0223	1.9366	0.4616	0.0522	1.0773	3.373	1.6138	0.044	0.0104
	6	5.67	6.7374	4.7473	1.9901	0.426	0.0518	0.9859	3.4025	1.5074	0.0234	0.0071
	6	5.67	6.4849	4.4878	1.9971	0.3802	0.041	0.9071	3.4188	1.4661	0.0181	0.0083
	6	5.67	6.151	4.1692	1.9818	0.3325	0.0306	0.8226	3.423	1.416	0.0129	0.0096
	6	5.67	5.7604	3.8083	1.952	0.2833	0.0209	0.7328	3.4123	1.356	0.0082	0.0111
	6	5.67	5.3333	3.4204	1.9128	0.2335	0.0124	0.6387	3.3835	1.2856	0.0043	0.0128
	6	5.67	4.8864	3.0178	1.8685	0.1843	0.0056	0.5414	3.334	1.2044	0.0014	0.0146
	6	5.67	4.434	2.6115	1.8225	0.137	0.0013	0.443	3.2615	1.1125	0.0001	0.0167
	6	5.67	3.9884	2.2109	1.7775	0.0936	0.0001	0.3459	3.1643	1.011	0.0007	0.0189
	6	5.67	3.561	1.8257	1.7354	0.056	0.0026	0.2534	3.0412	0.9013	0.0036	0.0213
	6	5.67	3.1604	1.4624	1.698	0.0265	0.0096	0.1694	2.892	0.7859	0.0092	0.0237
	6	5.67	2.7948	1.1284	1.6664	0.0073	0.0213	0.0982	2.7174	0.6678	0.0177	0.0263
	6	5.67	2.4718	0.8303	1.6415	0	0.0378	0.0441	2.5193	0.5509	0.0291	0.0288
	6	5.67	2.1963	0.5728	1.6235	0.0058	0.0589	0.0108	2.3008	0.4389	0.0431	0.0313
	6	5.67	1.9734	0.3605	1.6129	0.0247	0.0839	0	2.0668	0.3358	0.0592	0.0336
	6	5.67	1.8054	0.1963	1.6091	0.056	0.112	0.0118	1.8236	0.2446	0.0769	0.0357
	6	5.67	1.6931	0.0815	1.6116	0.0977	0.1421	0.0442	1.5793	0.1676	0.0953	0.0376
	6	5.67	1.6355	0.0168	1.6187	0.1479	0.1733	0.0938	1.3424	0.106	0.1139	0.0393
	6	5.67	1.6293	0.0005	1.6288	0.2042	0.2045	0.1569	1.1211	0.0597	0.1319	0.0406
	6	5.67	1.6682	0.0298	1.6384	0.2643	0.2348	0.2296	0.9215	0.0277	0.1489	0.0417
	6	5.67	1.7429	0.0997	1.6432	0.3261	0.2636	0.3084	0.7469	0.0087	0.1645	0.0425
	6	5.67	1.8414	0.2042	1.6372	0.3882	0.2905	0.3905	0.598	0.0006	0.1786	0.043
	6	5.67	1.9465	0.3352	1.6113	0.449	0.3151	0.4735	0.4734	0.0015	0.191	0.0434
	6	5.67	1.2544	0.6625	0.5919	0.3955	0.2717	0.3881	0.0025	0.0014	0.1405	0.0674
	6	5.67	0.8547	0.2507	0.604	0.2705	0.1892	0.2062	0	0.048	0.0622	0.1207
	6	5.67	0.6613	0.027	0.6343	0.1597	0.1174	0.0685	0.0022	0.1649	0.0123	0.1881
	6	5.67	0.7151	0.0315	0.6836	0.0739	0.0607	0.0033	0.0092	0.3431	0.001	0.2645
	6	5.67	1.0038	0.257	0.7468	0.0204	0.0222	0.0192	0.0204	0.5599	0.0284	0.3436
	6	5.67	1.312	0.4941	0.8179	0.003	0.0085	0.0662	0.0259	0.7383	0.0555	0.3975
	6	5.67	1.2993	0.4012	0.8981	0.003	0.0167	0.0538	0.0137	0.7873	0.0252	0.3933
	6	5.67	1.2812	0.3057	0.9756	0.0029	0.028	0.0416	0.0047	0.8258	0.0057	0.3824
	6	5.67	1.265	0.2148	1.0502	0.0028	0.0425	0.0301	0.0003	0.8487	0.0002	0.3642
	6	5.67	1.2551	0.1346	1.1205	0.0027	0.0598	0.02	0.0015	0.852	0.0107	0.339
	6	5.67	1.254	0.0709	1.1831	0.0025	0.0789	0.0116	0.0086	0.8343	0.0375	0.308
	6	5.67	1.2603	0.0264	1.2339	0.0022	0.0989	0.0054	0.021	0.797	0.0791	0.273
	6	5.67	1.2687	0.0035	1.2651	0.002	0.1187	0.0016	0.0374	0.7441	0.1324	0.2365
	6	5.67	1.2701	0.0004	1.2698	0.0019	0.1291	0.0001	0.0515	0.6963	0.18	0.2126
	6	5.67	1.2607	0	1.2607	0.0026	0.1061	0	0.0474	0.7035	0.1743	0.2387
	6	5.67	1.2407	0	1.2407	0.0036	0.083	0.0003	0.043	0.7085	0.1673	0.2677
	6	5.67	1.215	0.001	1.214	0.0047	0.0607	0.001	0.0382	0.7103	0.159	0.2995
	6	5.67	1.1875	0.0029	1.1846	0.0061	0.04	0.0023	0.0333	0.7084	0.1493	0.3335
	6	5.67	1.1611	0.0059	1.1553	0.0077	0.0224	0.0043	0.0282	0.7019	0.1383	0.3691
	6	5.67	1.1383	0.0101	1.1282	0.0095	0.009	0.007	0.0232	0.6902	0.1261	0.4053
	6	5.67	1.1208	0.0159	1.105	0.0116	0.0014	0.0105	0.0183	0.6727	0.1128	0.4407
	6	5.67	1.1094	0.0225	1.0869	0.0138	0.0006	0.0147	0.0137	0.6494	0.0989	0.474
	6	5.67	1.105	0.0304	1.0746	0.016	0.0074	0.0195	0.0096	0.6204	0.0847	0.5039
	6	5.67	1.1073	0.0387	1.0686	0.0182	0.022	0.0249	0.0062	0.5862	0.0708	0.529
	6	5.67	1.1162	0.0477	1.0685	0.0203	0.0437	0.0306	0.0034	0.5475	0.0575	0.5487
	6	5.67	1.1306	0.0568	1.0739	0.0222	0.0714	0.0365	0.0015	0.5058	0.0453	0.5623
	6	5.67	1.1488	0.066	1.0828	0.0237	0.1036	0.0423	0.0004	0.4622	0.0345	0.5699
	6	5.67	1.1689	0.0747	1.0942	0.025	0.1385	0.0479	0	0.4182	0.0252	0.5718
	6	5.67	1.1877	0.0829	1.1049	0.026	0.1746	0.0532	0.0003	0.3752	0.0176	0.5686
	6	5.67	1.2012	0.0898	1.1113	0.0267	0.2106	0.058	0.0013	0.3342	0.0115	0.5613
	6	5.67	1.204	0.0958	1.1082	0.0271	0.2456	0.0624	0.0026	0.296	0.007	0.5507
	6	5.67	1.2103	0.1072	1.1031	0.0273	0.2612	0.0584	0.004	0.294	0.0048	0.5483
	6	5.67	1.2191	0.1245	1.0946	0.0272	0.2649	0.0491	0.0053	0.3165	0.0038	0.5522
	6	5.67	1.2217	0.1444	1.0773	0.0272	0.2685	0.0398	0.0069	0.3412	0.0027	0.5558
	6	5.67	1.2202	0.1665	1.0537	0.0271	0.272	0.0308	0.0089	0.3685	0.0018	0.5587
	6	5.67	1.2168	0.1912	1.0256	0.0269	0.2753	0.0223	0.0113	0.3982	0.0009	0.5609
	6	5.67	1.2128	0.2179	0.9949	0.0267	0.2783	0.0147	0.0141	0.4306	0.0004	0.5621
	6	5.67	1.2092	0.2468	0.9624	0.0264	0.2808	0.0082	0.0175	0.4657	0.0001	0.5621
	6	5.67	1.2075	0.2783	0.9292	0.026	0.2827	0.0033	0.0214	0.5033	0.0001	0.5605
	6	5.67	1.2084	0.3124	0.896	0.0255	0.2838	0.0005	0.0259	0.5432	0.0006	0.557
	6	5.67	1.2122	0.3485	0.8636	0.0249	0.2841	0.0002	0.0311	0.5853	0.0016	0.5514
	6	5.67	1.2198	0.3872	0.8326	0.0242	0.2832	0.0031	0.037	0.6291	0.0031	0.5433
	6	5.67	1.2312	0.4279	0.8033	0.0234	0.2811	0.0094	0.0434	0.6739	0.0053	0.5325
	6	5.67	1.2472	0.4709	0.7762	0.0224	0.2777	0.0198	0.0505	0.719	0.0081	0.5188
	6	5.67	1.2678	0.5162	0.7516	0.0213	0.2728	0.0344	0.0581	0.7635	0.0118	0.5021
	6	5.67	1.2932	0.5638	0.7294	0.0202	0.2665	0.0534	0.0661	0.8066	0.016	0.4823
	6	5.67	1.3235	0.6134	0.7101	0.0189	0.2587	0.0765	0.0744	0.8472	0.021	0.4596
	6	5.67	1.3585	0.665	0.6935	0.0176	0.2496	0.1034	0.0829	0.8845	0.0264	0.4343
	6	5.67	1.3983	0.7181	0.6802	0.0162	0.2392	0.1335	0.0914	0.9175	0.0325	0.4067
	6	5.67	1.4426	0.7727	0.6699	0.0148	0.2279	0.1661	0.0996	0.9457	0.0387	0.3775
	6	5.67	1.4907	0.8281	0.6626	0.0134	0.2158	0.2003	0.1075	0.9687	0.0452	0.3472
	6	5.67	1.5424	0.8839	0.6584	0.012	0.2032	0.2354	0.115	0.9862	0.0517	0.3166
	6	5.67	1.5966	0.9396	0.657	0.0107	0.1903	0.2705	0.1219	0.9982	0.0581	0.2863
	6	5.67	1.6523	0.9941	0.6582	0.0094	0.1773	0.3051	0.1282	1.0051	0.0643	0.257
	6	5.67	1.7084	1.0469	0.6615	0.0082	0.1646	0.3386	0.1337	1.0072	0.0702	0.2291
	6	5.67	1.7629	1.0964	0.6665	0.0071	0.1523	0.3706	0.1386	1.0051	0.0756	0.2031
	6	5.67	1.8137	1.1415	0.6722	0.0061	0.1404	0.4007	0.1429	0.9993	0.0807	0.1792
	6	5.67	1.8577	1.1802	0.6775	0.0053	0.1293	0.4288	0.1465	0.9906	0.0853	0.1574
	6	5.67	1.8912	1.2108	0.6804	0.0045	0.1188	0.4548	0.1495	0.9794	0.0895	0.1379
	6	5.67	1.9097	1.2303	0.6793	0.0038	0.109	0.4786	0.152	0.9664	0.0932	0.1204
	6	5.67	1.9313	1.2469	0.6843	0.0033	0.1037	0.4983	0.1571	0.9747	0.0911	0.1077
	6	5.67	2.1454	1.3243	0.821	0.0039	0.1322	0.4894	0.1918	1.1845	0.0442	0.1164
	6	5.67	2.3221	1.3523	0.9698	0.0043	0.1601	0.4623	0.225	1.3697	0.0118	0.117
	6	5.67	2.4481	1.3265	1.1216	0.0045	0.1833	0.4173	0.2524	1.5031	0	0.1073
	6	5.67	2.5026	1.2466	1.256	0.0045	0.1988	0.3589	0.271	1.5669	0.0104	0.0899
	6	5.67	2.4745	1.1957	1.2788	0.0043	0.1957	0.3402	0.2899	1.5442	0.0207	0.077
	6	5.67	2.4171	1.1812	1.236	0.0041	0.1836	0.3516	0.3159	1.4956	0.0221	0.0683
	6	5.67	2.3412	1.1577	1.1835	0.004	0.1707	0.3634	0.3447	1.4417	0.0237	0.0596
	6	5.67	2.2528	1.1271	1.1257	0.0038	0.1573	0.3757	0.3764	1.3821	0.0253	0.0508
	6	5.67	2.1566	1.0903	1.0663	0.0036	0.1434	0.3881	0.411	1.317	0.0271	0.0421
	6	5.67	2.0566	1.0491	1.0076	0.0034	0.129	0.4005	0.4485	1.246	0.029	0.0337
	6	5.67	1.9557	1.0039	0.9518	0.0031	0.1143	0.4126	0.4886	1.1696	0.0309	0.0258
	6	5.67	1.8563	0.9563	0.9	0.0029	0.0996	0.4242	0.5311	1.0879	0.033	0.0185
	6	5.67	1.76	0.9066	0.8534	0.0027	0.0851	0.4349	0.5754	1.0016	0.0351	0.0121
	6	5.67	1.6687	0.8557	0.813	0.0024	0.0709	0.4443	0.6208	0.9116	0.0372	0.0069
	6	5.67	1.5834	0.804	0.7794	0.0022	0.0573	0.452	0.6665	0.8189	0.0393	0.003
	6	5.67	1.5052	0.7523	0.7529	0.0019	0.0448	0.4576	0.7115	0.725	0.0414	0.0007
	6	5.67	1.4352	0.701	0.7341	0.0017	0.0333	0.4607	0.7547	0.6314	0.0433	0
	6	5.67	1.3738	0.6506	0.7231	0.0014	0.0233	0.4611	0.7953	0.5398	0.0451	0.0012
	6	5.67	1.3215	0.6011	0.7205	0.0012	0.015	0.4585	0.8323	0.452	0.0467	0.0042
	6	5.67	1.2787	0.553	0.7257	0.001	0.0084	0.4528	0.865	0.3696	0.048	0.0091
	6	5.67	1.246	0.5068	0.7391	0.0008	0.0037	0.4442	0.8929	0.2941	0.0491	0.0158
	6	5.67	1.2229	0.4624	0.7605	0.0006	0.0009	0.4328	0.9158	0.2267	0.0499	0.0241
	6	5.67	1.2095	0.4197	0.7898	0.0005	0.0001	0.419	0.9334	0.1681	0.0504	0.0339
	6	5.67	1.2054	0.379	0.8264	0.0003	0.001	0.4031	0.946	0.1189	0.0507	0.045
	6	5.67	1.2107	0.3409	0.8698	0.0002	0.0036	0.3857	0.9536	0.0789	0.0506	0.0571
	6	5.67	1.2235	0.3047	0.9188	0.0001	0.0076	0.3672	0.9568	0.0479	0.0504	0.0699
	6	5.67	1.2435	0.2706	0.9729	0.0001	0.013	0.3483	0.956	0.0254	0.05	0.0832
	6	5.67	1.2686	0.2388	1.0298	0	0.0194	0.3293	0.9518	0.0104	0.0493	0.0968
	6	5.67	1.2965	0.2086	1.0879	0	0.0266	0.3106	0.9446	0.0023	0.0486	0.1103
	6	5.67	1.3243	0.1803	1.144	0	0.0345	0.2925	0.935	0	0.0478	0.1238
	6	5.67	1.348	0.1536	1.1945	0	0.0429	0.2753	0.9237	0.0026	0.0469	0.1369
	6	5.67	1.3623	0.1279	1.2344	0	0.0515	0.2591	0.911	0.0094	0.0459	0.1496
	6	5.67	1.3676	0.1218	1.2457	0.0014	0.0651	0.3067	0.7991	0.0155	0.0356	0.2118
	6	5.67	1.3801	0.1216	1.2585	0.0084	0.0832	0.3958	0.5941	0.0198	0.02	0.3133
	6	5.67	1.3779	0.0997	1.2782	0.0141	0.1016	0.4347	0.4395	0.0276	0.0125	0.3768
	6	5.67	1.3394	0.0608	1.2786	0.0082	0.1208	0.3808	0.4281	0.0471	0.0176	0.3728
	6	5.67	1.3013	0.0293	1.272	0.0036	0.1431	0.3261	0.4148	0.0741	0.0239	0.3678
	6	5.67	1.2697	0.0079	1.2617	0.0007	0.1685	0.2715	0.3996	0.1098	0.0318	0.3615
	6	5.67	1.2495	0	1.2499	0	0.1974	0.218	0.3822	0.1555	0.0412	0.354
	6	5.67	1.2445	0.0063	1.2382	0.0018	0.2298	0.1671	0.3627	0.2126	0.0523	0.345
	6	5.67	1.2584	0.0303	1.2281	0.0067	0.2656	0.1202	0.341	0.2819	0.0653	0.3344
	6	5.67	1.2939	0.0726	1.2213	0.0152	0.3048	0.0789	0.3172	0.3639	0.0801	0.3222
	6	5.67	1.3529	0.1344	1.2185	0.0275	0.3469	0.0448	0.2915	0.4582	0.0967	0.3084
	6	5.67	1.437	0.2166	1.2205	0.0438	0.3914	0.0195	0.2643	0.5638	0.1151	0.293
	6	5.67	1.5475	0.3198	1.2277	0.0643	0.4377	0.0043	0.2359	0.679	0.135	0.2762
	6	5.67	1.6843	0.4437	1.2406	0.0888	0.4849	0.0002	0.2071	0.8013	0.1562	0.2582
	6	5.67	1.8475	0.588	1.2595	0.1169	0.5323	0.0078	0.1784	0.9283	0.1784	0.2392
	6	5.67	2.036	0.7521	1.2839	0.1482	0.5789	0.0273	0.1507	1.0573	0.2012	0.2197
	6	5.67	2.2479	0.934	1.314	0.1818	0.6239	0.0582	0.1244	1.1856	0.2243	0.1998
	6	5.67	2.481	1.132	1.349	0.2171	0.6666	0.0995	0.1003	1.3111	0.2473	0.1801
	6	5.67	2.7312	1.3434	1.3878	0.2533	0.7065	0.15	0.0787	1.4318	0.2698	0.1609
	6	5.67	2.9938	1.5646	1.4292	0.2895	0.7431	0.2082	0.0599	1.5461	0.2915	0.1425
	6	5.67	3.2627	1.7919	1.4708	0.3252	0.7761	0.2722	0.044	1.6528	0.3122	0.1251
	6	5.67	3.5297	2.0198	1.5099	0.3597	0.8054	0.3405	0.031	1.7511	0.3316	0.109
	6	5.67	3.7849	2.2426	1.5424	0.3927	0.8311	0.4115	0.0206	1.8406	0.3498	0.0943
	6	5.67	4.0162	2.4535	1.5627	0.4238	0.8532	0.4836	0.0128	1.9209	0.3665	0.0811
	6	5.67	4.1901	2.6295	1.5605	0.4479	0.8663	0.5515	0.0068	1.9894	0.3785	0.0704
	6	5.67	4.2585	2.7323	1.5262	0.4505	0.854	0.6056	0.0018	2.0431	0.3761	0.0647
	6	5.67	4.3083	2.829	1.4794	0.4516	0.8383	0.664	0	2.0954	0.3723	0.0587
	6	5.67	4.344	2.9196	1.4244	0.4506	0.8188	0.7265	0.002	2.1451	0.3669	0.0524
	6	5.67	4.3696	3.0037	1.366	0.4475	0.7954	0.7922	0.0088	2.1905	0.3598	0.0461
	6	5.67	4.3882	3.0814	1.3068	0.4418	0.768	0.8603	0.021	2.2299	0.3505	0.0396
	6	5.67	4.4017	3.1528	1.2489	0.4335	0.7366	0.9294	0.0396	2.2616	0.3392	0.0332
	6	5.67	4.4124	3.2177	1.1947	0.4224	0.7015	0.9982	0.0645	2.2836	0.3256	0.027
	6	5.67	4.4209	3.2756	1.1453	0.4087	0.6631	1.0651	0.0963	2.2943	0.31	0.0212
	6	5.67	4.4274	3.3256	1.1018	0.3925	0.6219	1.1287	0.1341	2.2918	0.2923	0.0159
	6	5.67	4.4318	3.3667	1.0651	0.3742	0.5786	1.1876	0.1777	2.2749	0.273	0.0112
	6	5.67	4.4333	3.3982	1.0352	0.3541	0.534	1.2406	0.2254	2.2424	0.2523	0.0073
	6	5.67	4.4297	3.4177	1.012	0.3328	0.4889	1.2868	0.2762	2.1938	0.231	0.0042
	6	5.67	4.4188	3.4236	0.9952	0.3106	0.4442	1.3257	0.3282	2.1293	0.2093	0.002
	6	5.67	4.3965	3.4126	0.9839	0.2882	0.4005	1.3569	0.3803	2.0497	0.188	0.0006
	6	5.67	4.3573	3.3809	0.9764	0.2659	0.3586	1.3805	0.4306	1.9567	0.1674	0
	6	5.67	4.2942	3.324	0.9702	0.2441	0.3189	1.3966	0.4783	1.8533	0.148	0.0002
	6	5.67	4.1969	3.2345	0.9624	0.2232	0.2819	1.4059	0.5222	1.7431	0.1299	0.001
	7	5.67	1.028	0.3805	0.6475	0.0382	0.2193	0.0041	0.0557	0.6507	0.1029	0.0046
	7	5.67	1.1759	0.666	0.5099	0.0007	0.1266	0.0143	0.1981	0.7793	0.0825	0.0095
	7	5.67	1.2433	0.7466	0.4967	0.0103	0.1158	0.0244	0.223	0.8217	0.0729	0.0117
	7	5.67	1.2687	0.7692	0.4995	0.0209	0.1236	0.0245	0.2091	0.8467	0.0666	0.013
	7	5.67	1.292	0.7889	0.5031	0.0363	0.1313	0.0244	0.1937	0.8693	0.0598	0.0145
	7	5.67	1.3146	0.8054	0.5092	0.0571	0.1386	0.0242	0.1769	0.8888	0.0526	0.016
	7	5.67	1.3375	0.8188	0.5187	0.0837	0.1454	0.0237	0.1589	0.9043	0.0453	0.0176
	7	5.67	1.3612	0.8285	0.5327	0.1158	0.1512	0.023	0.14	0.9149	0.038	0.0191
	7	5.67	1.3859	0.8344	0.5515	0.153	0.1557	0.0221	0.1207	0.9202	0.031	0.0207
	7	5.67	1.4109	0.8353	0.5756	0.194	0.1586	0.021	0.1015	0.9198	0.0243	0.0221
	7	5.67	1.4358	0.8318	0.604	0.2375	0.1599	0.0196	0.0829	0.9136	0.0182	0.0235
	7	5.67	1.4597	0.823	0.6367	0.2818	0.1594	0.0182	0.0657	0.9017	0.013	0.0247
	7	5.67	1.4807	0.8083	0.6724	0.3253	0.1573	0.0166	0.0502	0.8845	0.0086	0.0256
	7	5.67	1.4969	0.7881	0.7089	0.3665	0.1539	0.015	0.0368	0.8626	0.0051	0.0264
	7	5.67	1.5056	0.762	0.7437	0.4044	0.1492	0.0134	0.0256	0.8369	0.0026	0.027
	7	5.67	1.5024	0.7292	0.7732	0.4382	0.1438	0.0119	0.0167	0.8081	0.001	0.0273
	7	5.67	1.6039	0.7856	0.8182	0.4689	0.1499	0.0136	0.0146	0.8552	0.0013	0.0422
	7	5.67	1.7559	0.8842	0.8717	0.5012	0.1619	0.0169	0.0148	0.9418	0.0026	0.071
	7	5.67	1.9132	0.9865	0.9268	0.535	0.1746	0.0207	0.0148	1.0348	0.0045	0.1103
	7	5.67	2.0779	1.0924	0.9855	0.5699	0.188	0.0251	0.0149	1.1319	0.0072	0.1617
	7	5.67	2.2512	1.2021	1.0491	0.6049	0.2017	0.0302	0.0148	1.2304	0.0107	0.2266
	7	5.67	2.4341	1.3151	1.119	0.6391	0.2156	0.0358	0.0147	1.3267	0.0151	0.3059
	7	5.67	2.6265	1.4303	1.1962	0.6711	0.2293	0.042	0.0145	1.4178	0.0203	0.3995
	7	5.67	2.828	1.5469	1.2811	0.6998	0.2422	0.0486	0.0142	1.5004	0.0265	0.5064
	7	5.67	3.0374	1.6633	1.374	0.7237	0.2541	0.0556	0.0138	1.5724	0.0335	0.6245
	7	5.67	3.2529	1.7786	1.4744	0.7418	0.2645	0.0627	0.0133	1.6318	0.0412	0.7508
	7	5.67	3.472	1.8904	1.5817	0.7532	0.273	0.0699	0.0126	1.6777	0.0493	0.8817
	7	5.67	3.6908	1.9965	1.6943	0.7575	0.2793	0.0769	0.012	1.7094	0.0578	1.0135
	7	5.67	3.9053	2.095	1.8103	0.7546	0.2833	0.0836	0.0113	1.7272	0.0662	1.1431
	7	5.67	4.1093	2.1823	1.927	0.745	0.285	0.09	0.0105	1.7315	0.0745	1.2673
	7	5.67	4.296	2.2559	2.0402	0.7294	0.2845	0.0957	0.0097	1.7235	0.0825	1.3842
	7	5.67	4.4572	2.3126	2.1445	0.7091	0.2821	0.1008	0.009	1.7046	0.0898	1.4922
	7	5.67	4.5822	2.3486	2.2335	0.6851	0.278	0.1054	0.0082	1.6765	0.0966	1.5903
	7	5.67	4.6586	2.3604	2.2982	0.6587	0.2725	0.1093	0.0075	1.641	0.1026	1.6782
	7	5.67	4.6077	2.2627	2.345	0.6492	0.25	0.0974	0.0063	1.5834	0.0973	1.7437
	7	5.67	4.3678	2.0048	2.363	0.6634	0.2031	0.0635	0.0043	1.4851	0.0755	1.7596
	7	5.67	4.0479	1.7166	2.3313	0.6718	0.1572	0.0335	0.0025	1.366	0.0542	1.7299
	7	5.67	3.6725	1.4126	2.2599	0.6729	0.1143	0.0112	0.0011	1.2268	0.0348	1.6514
	7	5.67	3.265	1.1077	2.1573	0.6653	0.0761	0.0005	0.0003	1.0701	0.0188	1.5246
	7	5.67	2.8466	0.8181	2.0284	0.6485	0.0446	0.0039	0.0001	0.9016	0.0073	1.3546
	7	5.67	2.4366	0.5596	1.8771	0.6226	0.0211	0.021	0.0006	0.7299	0.0011	1.1531
	7	5.67	2.0497	0.3448	1.7048	0.5886	0.0063	0.0489	0.0018	0.566	0.0004	0.9391
	7	5.67	1.6943	0.1825	1.5118	0.5483	0.0002	0.0837	0.0034	0.4198	0.0045	0.7355
	7	5.67	1.5514	0.1084	1.443	0.5062	0.0003	0.1161	0.0067	0.3632	0.0093	0.6567
	7	5.67	1.4814	0.0629	1.4186	0.4606	0.0014	0.1518	0.0126	0.3365	0.0145	0.62
	7	5.67	1.4076	0.0277	1.3799	0.4107	0.0034	0.1942	0.0208	0.3072	0.0212	0.5782
	7	5.67	1.3368	0.0059	1.3309	0.3576	0.0065	0.2435	0.0315	0.2759	0.0296	0.5315
	7	5.67	1.2747	0.0002	1.2744	0.3026	0.0107	0.2994	0.0451	0.2428	0.0398	0.4804
	7	5.67	1.2258	0.0133	1.2125	0.2473	0.0162	0.3613	0.0612	0.2089	0.0516	0.4258
	7	5.67	1.194	0.0469	1.1471	0.1937	0.0229	0.428	0.0799	0.1749	0.0648	0.369
	7	5.67	1.1819	0.1027	1.0792	0.144	0.0306	0.4979	0.1006	0.1419	0.079	0.3119
	7	5.67	1.1907	0.1804	1.0103	0.1001	0.0391	0.5693	0.123	0.1109	0.0936	0.2563
	7	5.67	1.2198	0.2792	0.9407	0.0636	0.0482	0.6403	0.1461	0.0829	0.1079	0.2041
	7	5.67	1.2677	0.3966	0.8711	0.0354	0.0576	0.709	0.1695	0.0587	0.1216	0.1569
	7	5.67	1.3302	0.5282	0.802	0.0158	0.0669	0.7738	0.1923	0.0388	0.1342	0.1159
	7	5.67	1.402	0.6692	0.7328	0.0043	0.0758	0.8335	0.2141	0.0233	0.1452	0.0816
	7	5.67	1.4751	0.8118	0.6633	0.0001	0.0842	0.8872	0.2342	0.0121	0.1547	0.0542
	7	5.67	1.6178	0.9457	0.6721	0	0.0882	0.9605	0.2578	0.0064	0.1986	0.0517
	7	5.67	1.7992	1.0677	0.7314	0.0006	0.0876	1.0389	0.2829	0.0031	0.2782	0.0638
	7	5.67	1.9637	1.1741	0.7897	0.0025	0.0842	1.0956	0.3041	0.0008	0.3676	0.0765
	7	5.67	2.1044	1.2581	0.8463	0.0058	0.0779	1.1241	0.3191	0	0.458	0.0893
	7	5.67	2.2115	1.3135	0.8981	0.0104	0.0693	1.122	0.3266	0.0008	0.5399	0.1011
	7	5.67	2.2719	1.3319	0.9399	0.0159	0.0594	1.0913	0.3262	0.0031	0.6066	0.1114
	7	5.67	2.2604	1.3207	0.9397	0.0201	0.0522	1.0445	0.3262	0.0065	0.6331	0.1122
	7	5.67	2.1676	1.342	0.8256	0.0159	0.0563	1.0134	0.3543	0.0111	0.5636	0.0826
	7	5.67	2.0562	1.3519	0.7042	0.0117	0.0604	0.9732	0.3825	0.0173	0.4876	0.0547
	7	5.67	1.9364	1.351	0.5854	0.0078	0.0643	0.9234	0.4097	0.0253	0.4069	0.0305
	7	5.67	1.8169	1.3398	0.4771	0.0044	0.0676	0.8639	0.4348	0.035	0.3247	0.0122
	7	5.67	1.7039	1.3185	0.3854	0.0019	0.0701	0.7954	0.4564	0.0463	0.2446	0.0017
	7	5.67	1.6017	1.2869	0.3148	0.0004	0.0716	0.7197	0.4735	0.0584	0.1712	0.0007
	7	5.67	1.5138	1.2448	0.269	0.0001	0.072	0.6389	0.4854	0.071	0.1082	0.0097
	7	5.67	1.4408	1.1919	0.2489	0.0009	0.0713	0.5561	0.4917	0.0831	0.059	0.0279
	7	5.67	1.3822	1.1279	0.2543	0.0029	0.0696	0.4745	0.4926	0.0941	0.0248	0.0536
	7	5.67	1.3353	1.0535	0.2819	0.0056	0.0671	0.3971	0.4882	0.1037	0.0058	0.0847
	7	5.67	1.2954	0.9697	0.3257	0.009	0.064	0.3263	0.4795	0.1115	0	0.1189
	7	5.67	0.9901	0.6876	0.3025	0	0.0337	0.2703	0.3868	0.0903	0.0007	0.0637
	7	5.67	0.7214	0.4297	0.2917	0.0065	0.0116	0.2136	0.2945	0.0694	0.0026	0.0209
	7	5.67	0.5179	0.2181	0.2998	0.0305	0.0007	0.1589	0.2071	0.0497	0.0059	0.0005
	7	5.67	0.402	0.0724	0.3296	0.0735	0.0033	0.109	0.1298	0.0323	0.0107	0.0117
	7	5.67	0.3862	0.0043	0.382	0.1349	0.0205	0.0666	0.0679	0.0181	0.0167	0.0567
	7	5.67	0.4712	0.0178	0.4534	0.2128	0.0516	0.034	0.0252	0.0079	0.0237	0.1293
	7	5.67	0.6437	0.1066	0.5371	0.3042	0.094	0.0123	0.0034	0.0018	0.0311	0.2178
	7	5.67	0.8607	0.2448	0.616	0.3973	0.1419	0.0019	0.001	0	0.0386	0.3057
	7	5.67	0.947	0.3073	0.6398	0.4197	0.1731	0.0005	0.003	0.0004	0.0463	0.3519
	7	5.67	1.0424	0.3807	0.6616	0.4429	0.2094	0	0.0065	0.0015	0.0552	0.4039
	7	5.67	1.1477	0.465	0.6827	0.4669	0.2508	0.0004	0.0116	0.0038	0.0652	0.4617
	7	5.67	1.2642	0.5603	0.7039	0.4912	0.2974	0.0021	0.0187	0.0071	0.0763	0.5245
	7	5.67	1.3921	0.6666	0.7255	0.5157	0.3489	0.0052	0.0279	0.0117	0.0886	0.5912
	7	5.67	1.5315	0.7834	0.748	0.5399	0.4045	0.0097	0.0392	0.0176	0.1018	0.6601
	7	5.67	1.6814	0.9099	0.7715	0.5634	0.4634	0.0159	0.0527	0.0249	0.1159	0.7291
	7	5.67	1.8407	1.0447	0.796	0.5859	0.5245	0.0237	0.0681	0.0335	0.1306	0.7957
	7	5.67	2.0073	1.1859	0.8214	0.607	0.5862	0.0329	0.0851	0.0433	0.1457	0.8575
	7	5.67	2.1787	1.3317	0.847	0.6263	0.6472	0.0434	0.103	0.0541	0.1608	0.9122
	7	5.67	2.3516	1.4795	0.8721	0.6434	0.7062	0.055	0.1214	0.0657	0.1758	0.9582
	7	5.67	2.5211	1.6252	0.8959	0.6583	0.762	0.0672	0.1396	0.0778	0.1904	0.994
	7	5.67	2.6821	1.7654	0.9167	0.6707	0.8136	0.0799	0.1571	0.0903	0.2043	1.019
	7	5.67	2.8286	1.8964	0.9323	0.6804	0.8603	0.0925	0.1735	0.1027	0.2174	1.0332
	7	5.67	2.9524	2.0122	0.9402	0.6876	0.9017	0.105	0.1884	0.1149	0.2294	1.0369
	7	5.67	3.0443	2.1077	0.9366	0.6923	0.9377	0.1169	0.2017	0.1267	0.2404	1.0315
	7	5.67	3.2878	2.319	0.9689	0.7049	0.9955	0.1455	0.2167	0.1437	0.2785	1.121
	7	5.67	3.6002	2.5862	1.014	0.7172	1.0639	0.1874	0.2331	0.1648	0.3351	1.2607
	7	5.67	3.9041	2.8497	1.0543	0.7219	1.1294	0.2365	0.2494	0.1879	0.3988	1.4032
	7	5.67	4.1981	3.1064	1.0917	0.7167	1.1882	0.2927	0.265	0.212	0.4686	1.5415
	7	5.67	4.48	3.3527	1.1273	0.6996	1.2366	0.3549	0.2792	0.2366	0.5425	1.6685
	7	5.67	4.7462	3.5845	1.1617	0.6693	1.2709	0.4215	0.2913	0.2606	0.6179	1.7784
	7	5.67	4.9918	3.7966	1.1952	0.6262	1.2883	0.4905	0.3007	0.2829	0.6916	1.8671
	7	5.67	5.2098	3.9833	1.2266	0.5719	1.2873	0.5593	0.307	0.3023	0.7603	1.9315
	7	5.67	5.3921	4.1376	1.2545	0.5095	1.2679	0.6255	0.31	0.318	0.8212	1.9701
	7	5.67	5.5283	4.2522	1.2761	0.4433	1.2313	0.687	0.3096	0.3293	0.8717	1.9827
	7	5.67	5.6057	4.3177	1.288	0.3777	1.1805	0.742	0.3062	0.336	0.9108	1.9702
	7	5.67	5.609	4.3245	1.2845	0.3163	1.1192	0.7897	0.3003	0.3384	0.938	1.9354
	7	5.67	5.5551	4.2997	1.2554	0.2818	1.0554	0.8351	0.305	0.3349	0.9263	1.909
	7	5.67	5.5243	4.3196	1.2047	0.298	0.9962	0.8933	0.3412	0.3242	0.8434	1.9383
	7	5.67	5.4619	4.3107	1.1512	0.3149	0.9325	0.9551	0.3812	0.3115	0.7564	1.9633
	7	5.67	5.3762	4.2756	1.1006	0.3322	0.8647	1.0197	0.4249	0.2966	0.6663	1.9825
	7	5.67	5.275	4.2178	1.0573	0.3497	0.7931	1.086	0.4721	0.2793	0.5744	1.9941
	7	5.67	5.1642	4.1392	1.025	0.3667	0.7183	1.1527	0.5222	0.2596	0.4825	1.9964
	7	5.67	5.049	4.0425	1.0065	0.3829	0.6412	1.2179	0.5745	0.2377	0.3925	1.9876
	7	5.67	4.9341	3.9297	1.0044	0.3976	0.563	1.2799	0.6279	0.2138	0.3067	1.9663
	7	5.67	4.8232	3.803	1.0203	0.4104	0.4849	1.3364	0.6814	0.1883	0.2276	1.931
	7	5.67	4.7192	3.6633	1.0559	0.4206	0.4084	1.3857	0.7336	0.162	0.1576	1.8809
	7	5.67	4.6248	3.5135	1.1112	0.4278	0.3353	1.426	0.7834	0.1356	0.0988	1.8155
	7	5.67	4.5408	3.354	1.1868	0.4317	0.2671	1.4562	0.8295	0.1101	0.0529	1.7348
	7	5.67	4.4688	3.187	1.2817	0.4323	0.2053	1.4756	0.8709	0.0864	0.0211	1.6398
	7	5.67	4.4076	3.0125	1.3951	0.4295	0.1511	1.4839	0.9069	0.0652	0.0037	1.5323
	7	5.67	4.3562	2.8323	1.5239	0.4237	0.1053	1.4819	0.937	0.047	0.0004	1.4151
	7	5.67	4.3105	2.6462	1.6643	0.4151	0.0682	1.4702	0.9609	0.0321	0.0101	1.2919
	7	5.67	4.2662	2.4546	1.8116	0.4043	0.0397	1.4503	0.9787	0.0203	0.0313	1.1674
	7	5.67	4.2152	2.2571	1.9581	0.3918	0.0195	1.4236	0.9907	0.0117	0.0623	1.0457
	7	5.67	4.1465	2.0525	2.094	0.3782	0.0068	1.3917	0.9973	0.0057	0.1013	0.9309
	7	5.67	4.0273	1.8369	2.1904	0.3806	0.0011	1.3867	0.9972	0.0001	0.132	0.7954
	7	5.67	3.8087	1.5814	2.2273	0.403	0.0002	1.4069	0.9637	0.0123	0.1401	0.6118
	7	5.67	3.5355	1.2983	2.2372	0.4162	0.0031	1.3943	0.8871	0.0568	0.1428	0.4298
	7	5.67	3.2368	1.0115	2.2253	0.4179	0.0101	1.3461	0.7732	0.1318	0.139	0.2661
	7	5.67	2.9271	0.741	2.1862	0.4078	0.0205	1.2635	0.6371	0.2281	0.1292	0.137
0	8	5.67	1.3936	0.3743	1.0193	0.0568	0.0448	0.0356	0.0434	0.6868	0.4085	0.1883
1	8	5.67	1.3566	0.2999	1.0566	0.0603	0.0365	0.0556	0.03	0.671	0.3988	0.1711
2	8	5.67	1.3115	0.2267	1.0848	0.0639	0.0284	0.0825	0.018	0.6511	0.3862	0.1526
3	8	5.67	1.2648	0.1587	1.1061	0.0676	0.0209	0.1173	0.0083	0.6266	0.3705	0.1329
4	8	5.67	1.2207	0.099	1.1217	0.0714	0.0141	0.1609	0.0019	0.5971	0.3514	0.1125
5	8	5.67	1.1843	0.0511	1.1332	0.0751	0.0084	0.2136	0.0001	0.5624	0.3289	0.0918
6	8	5.67	1.1592	0.0176	1.1416	0.0787	0.004	0.2748	0.0039	0.5227	0.3033	0.0715
7	8	5.67	1.1481	0.0009	1.1472	0.082	0.0011	0.3428	0.0143	0.4782	0.2751	0.0524
8	8	5.67	1.1532	0.0027	1.1505	0.0851	0	0.4151	0.0317	0.4299	0.2448	0.0352
9	8	5.67	1.1754	0.0238	1.1516	0.0878	0.0009	0.4887	0.0556	0.379	0.2136	0.021
10	8	5.67	1.2148	0.0648	1.15	0.0901	0.0037	0.5606	0.0851	0.3271	0.1823	0.0101
11	8	5.67	1.2698	0.1245	1.1453	0.0918	0.0083	0.6283	0.1188	0.2761	0.1521	0.0032
12	8	5.67	1.3375	0.2014	1.1361	0.0931	0.0147	0.6897	0.1548	0.2276	0.124	0.0002
13	8	5.67	1.4136	0.2921	1.1215	0.0938	0.0226	0.7435	0.1915	0.1832	0.0985	0.0008
14	8	5.67	1.4911	0.3921	1.099	0.094	0.0317	0.789	0.2275	0.1438	0.0762	0.0045
15	8	5.67	1.5618	0.4957	1.066	0.0938	0.0417	0.8263	0.2615	0.1101	0.0573	0.0107
16	8	5.67	1.6139	0.5952	1.0187	0.0932	0.0524	0.8557	0.2928	0.0821	0.0417	0.0188
17	8	5.67	1.5663	0.546	1.0203	0.0868	0.0416	0.8439	0.2749	0.0882	0.0465	0.0172
18	8	5.67	1.5028	0.4912	1.0116	0.08	0.0313	0.8282	0.2554	0.0947	0.0517	0.0155
19	8	5.67	1.4285	0.4331	0.9954	0.0729	0.0217	0.8079	0.2346	0.1015	0.0573	0.0137
20	8	5.67	1.3472	0.3734	0.9738	0.0655	0.0134	0.7824	0.2127	0.1086	0.0632	0.0119
21	8	5.67	1.2622	0.314	0.9482	0.0579	0.0067	0.7513	0.1899	0.1159	0.0695	0.0101
22	8	5.67	1.1763	0.2566	0.9197	0.0503	0.0021	0.7142	0.1665	0.1232	0.076	0.0084
23	8	5.67	1.0922	0.2028	0.8894	0.0428	0.0001	0.6713	0.1431	0.1304	0.0824	0.0067
24	8	5.67	1.0115	0.1537	0.8578	0.0354	0.001	0.6229	0.12	0.1373	0.0887	0.0052
25	8	5.67	0.9357	0.1102	0.8254	0.0285	0.005	0.5698	0.0979	0.1438	0.0946	0.0038
26	8	5.67	0.866	0.0731	0.7928	0.0221	0.0123	0.5132	0.0773	0.1498	0.0999	0.0026
27	8	5.67	0.8033	0.0435	0.7599	0.0164	0.0226	0.4547	0.0586	0.155	0.1044	0.0016
28	8	5.67	0.748	0.021	0.7271	0.0115	0.0358	0.396	0.0423	0.1594	0.1081	0.0009
29	8	5.67	0.7006	0.007	0.6936	0.0074	0.0513	0.3389	0.0286	0.1629	0.1108	0.0004
30	8	5.67	0.6603	0.0004	0.6599	0.0043	0.0687	0.2852	0.0177	0.1655	0.1126	0.0001
31	8	5.67	0.6265	0.0012	0.6252	0.002	0.0873	0.2361	0.0095	0.1672	0.1135	0
32	8	5.67	0.5984	0.0094	0.589	0.0006	0.1066	0.1923	0.004	0.1681	0.1137	0.0002
33	8	5.67	0.5742	0.0237	0.5505	0	0.1261	0.1542	0.0009	0.1682	0.1132	0.0005
34	8	5.67	0.5568	0.0275	0.5293	0	0.1269	0.1431	0.0009	0.1644	0.1104	0.001
35	8	5.67	0.5476	0.0123	0.5353	0	0.1003	0.1682	0.0058	0.1546	0.1044	0.0019
36	8	5.67	0.5435	0.0024	0.541	0.0002	0.0743	0.1969	0.0164	0.1438	0.0975	0.0032
37	8	5.67	0.5481	0.0001	0.548	0.0005	0.0502	0.2291	0.0338	0.1319	0.0898	0.0048
38	8	5.67	0.5648	0.007	0.5579	0.001	0.0291	0.2649	0.0594	0.1191	0.0812	0.0068
39	8	5.67	0.5966	0.0243	0.5723	0.0018	0.0127	0.3038	0.0941	0.1054	0.0719	0.0094
40	8	5.67	0.6453	0.0536	0.5917	0.0027	0.0025	0.3453	0.1387	0.0911	0.0621	0.0123
41	8	5.67	0.713	0.0961	0.6169	0.0039	0.0002	0.3885	0.1931	0.0766	0.052	0.0158
42	8	5.67	0.8002	0.1515	0.6487	0.0053	0.0068	0.4323	0.2566	0.0623	0.042	0.0197
43	8	5.67	0.9076	0.2205	0.6871	0.007	0.0231	0.4755	0.3275	0.0487	0.0324	0.0239
44	8	5.67	1.0344	0.3025	0.7319	0.0088	0.0487	0.5169	0.4037	0.0363	0.0237	0.0284
45	8	5.67	1.1791	0.3965	0.7826	0.0107	0.0826	0.5553	0.4825	0.0254	0.0162	0.0332
46	8	5.67	1.3386	0.5002	0.8384	0.0128	0.1234	0.5899	0.5608	0.0164	0.0101	0.0379
47	8	5.67	1.5085	0.611	0.8976	0.0148	0.1689	0.6199	0.6361	0.0094	0.0055	0.0427
48	8	5.67	1.6831	0.7251	0.958	0.0169	0.2171	0.645	0.7061	0.0044	0.0024	0.0474
49	8	5.67	1.8542	0.8378	1.0165	0.019	0.2662	0.6651	0.7689	0.0014	0.0007	0.0518
50	8	5.67	2.0115	0.943	1.0685	0.0209	0.3147	0.6804	0.8235	0.0001	0.0002	0.056
51	8	5.67	2.1409	1.0328	1.108	0.0227	0.3614	0.6912	0.8691	0.0002	0.0006	0.0598
52	8	5.67	3.2997	0.3073	2.9924	0.0144	0.3447	0.6515	0.8272	1.2581	0.0003	0.077
53	8	5.67	3.3054	0.1693	3.1361	0.0049	0.2989	0.5869	0.745	1.4789	0.0063	0.1046
54	8	5.67	3.3167	0.0681	3.2485	0.0003	0.2509	0.5184	0.6576	1.7204	0.0222	0.138
55	8	5.67	3.347	0.0109	3.3362	0.0017	0.2021	0.4471	0.5665	1.9733	0.0496	0.1774
56	8	5.67	3.4065	0.0033	3.4032	0.0104	0.1542	0.3747	0.4741	2.2258	0.0898	0.2223
57	8	5.67	3.5013	0.049	3.4524	0.0269	0.1096	0.3036	0.3829	2.4662	0.1431	0.2718
58	8	5.67	3.6342	0.1498	3.4844	0.0516	0.0704	0.2359	0.2961	2.6836	0.2084	0.3246
59	8	5.67	3.8027	0.3044	3.4983	0.0838	0.0388	0.1741	0.2169	2.8696	0.2835	0.3789
60	8	5.67	4.0013	0.509	3.4923	0.1226	0.0163	0.1202	0.1482	3.0175	0.3656	0.4329
61	8	5.67	4.2181	0.756	3.4622	0.1662	0.0035	0.0759	0.092	3.1236	0.4513	0.4849
62	8	5.67	4.4362	1.0339	3.4022	0.2131	0.0001	0.042	0.0495	3.1864	0.5373	0.5335
63	8	5.67	4.6326	1.3286	3.304	0.2615	0.005	0.0185	0.0207	3.2076	0.621	0.5778
64	8	5.67	4.7769	1.6218	3.155	0.3097	0.0169	0.0049	0.0047	3.1912	0.7001	0.6169
65	8	5.67	4.8344	1.6459	3.1885	0.3255	0.0208	0.0052	0.0068	3.2471	0.7209	0.613
66	8	5.67	4.8344	1.6224	3.2119	0.3379	0.0238	0.0068	0.0116	3.3071	0.7347	0.6022
67	8	5.67	4.7925	1.5837	3.2087	0.3505	0.0271	0.0087	0.0181	3.3571	0.7472	0.5887
68	8	5.67	4.7189	1.5328	3.186	0.363	0.0309	0.011	0.0265	3.3931	0.7577	0.5719
69	8	5.67	4.6213	1.4718	3.1495	0.375	0.035	0.0137	0.0372	3.4111	0.7656	0.5515
70	8	5.67	4.506	1.4027	3.1033	0.3861	0.0394	0.0168	0.0503	3.4073	0.7703	0.5274
71	8	5.67	4.3779	1.3276	3.0503	0.3962	0.0442	0.0204	0.0659	3.3786	0.7711	0.4994
72	8	5.67	4.2406	1.2474	2.9932	0.4046	0.0492	0.0243	0.0839	3.3231	0.7675	0.4677
73	8	5.67	4.0972	1.1639	2.9332	0.4111	0.0543	0.0285	0.1044	3.2399	0.7592	0.4324
74	8	5.67	3.9502	1.0781	2.8721	0.4154	0.0594	0.0331	0.127	3.1293	0.7459	0.3943
75	8	5.67	3.801	0.9908	2.8102	0.4172	0.0645	0.0378	0.1513	2.9934	0.7278	0.3542
76	8	5.67	3.6515	0.9038	2.7477	0.4165	0.0693	0.0426	0.1769	2.8349	0.705	0.313
77	8	5.67	3.5016	0.817	2.6846	0.4131	0.0737	0.0474	0.2032	2.6582	0.6782	0.2719
78	8	5.67	3.3522	0.7318	2.6204	0.4072	0.0778	0.052	0.2295	2.4682	0.6479	0.2321
79	8	5.67	3.2031	0.6487	2.5544	0.3991	0.0813	0.0565	0.2553	2.2706	0.615	0.1945
80	8	5.67	3.0537	0.5684	2.4854	0.389	0.0842	0.0607	0.2801	2.0709	0.5803	0.16
81	8	5.67	2.9032	0.4918	2.4114	0.3773	0.0866	0.0645	0.3036	1.8746	0.5447	0.1292
82	8	5.67	2.7493	0.4193	2.33	0.3645	0.0885	0.0679	0.3253	1.6863	0.509	0.1023
83	8	5.67	2.5896	0.3517	2.2379	0.3509	0.0898	0.0709	0.3451	1.5093	0.4739	0.0793
84	8	5.67	2.4208	0.2894	2.1313	0.3369	0.0907	0.0736	0.3629	1.346	0.4399	0.0601
85	8	5.67	1.146	0.0419	1.1041	0.3279	0.0916	0.0785	0.3812	0.081	0.4187	0.047
86	8	5.67	1.1714	0.0331	1.1383	0.331	0.0931	0.0909	0.4063	0.0762	0.4242	0.0407
87	8	5.67	1.1914	0.0251	1.1663	0.3339	0.0947	0.1051	0.4335	0.071	0.4297	0.0345
88	8	5.67	1.2079	0.0178	1.1901	0.3366	0.0963	0.1213	0.4629	0.0656	0.435	0.0285
89	8	5.67	1.2228	0.0115	1.2113	0.3389	0.0978	0.1396	0.4946	0.0598	0.4401	0.0227
90	8	5.67	1.2369	0.0061	1.2308	0.3408	0.0993	0.1603	0.5285	0.0538	0.4448	0.0172
91	8	5.67	1.2523	0.0023	1.25	0.3421	0.1008	0.1835	0.5645	0.0477	0.4491	0.0122
92	8	5.67	1.2697	0.0004	1.2693	0.3427	0.1021	0.2093	0.6027	0.0413	0.4526	0.0079
93	8	5.67	1.2898	0.0004	1.2894	0.3425	0.1032	0.2377	0.6426	0.035	0.4554	0.0044
94	8	5.67	1.3132	0.0021	1.3112	0.3413	0.1041	0.2687	0.684	0.0287	0.4571	0.0018
95	8	5.67	1.3409	0.0063	1.3346	0.339	0.1048	0.3023	0.7266	0.0227	0.4576	0.0003
96	8	5.67	1.3733	0.0131	1.3602	0.3356	0.1053	0.3383	0.7699	0.017	0.4568	0.0001
97	8	5.67	1.4108	0.0225	1.3883	0.3309	0.1054	0.3764	0.8133	0.0119	0.4545	0.0013
98	8	5.67	1.4539	0.0347	1.4192	0.3249	0.1051	0.4162	0.8563	0.0075	0.4504	0.004
99	8	5.67	1.5024	0.0497	1.4528	0.3176	0.1045	0.4573	0.8985	0.004	0.4446	0.0082
100	8	5.67	1.5573	0.0677	1.4895	0.309	0.1034	0.4991	0.9391	0.0015	0.437	0.014
101	8	5.67	1.6182	0.0891	1.5291	0.2993	0.102	0.541	0.9777	0.0002	0.4276	0.0214
102	8	5.67	1.6854	0.1138	1.5717	0.2885	0.1002	0.5825	1.0137	0	0.4165	0.0303
103	8	5.67	1.7585	0.1412	1.6173	0.2768	0.098	0.623	1.0468	0.001	0.4037	0.0407
104	8	5.67	1.8376	0.1719	1.6658	0.2644	0.0955	0.6619	1.0767	0.0031	0.3896	0.0524
105	8	5.67	1.9224	0.2059	1.7164	0.2515	0.0927	0.6988	1.1031	0.0063	0.3743	0.0651
106	8	5.67	2.0116	0.2424	1.7692	0.2383	0.0896	0.7333	1.1259	0.0103	0.3581	0.0789
107	8	5.67	2.105	0.2817	1.8232	0.225	0.0864	0.765	1.1451	0.0151	0.3413	0.0934
108	8	5.67	2.2009	0.3232	1.8777	0.2117	0.083	0.7937	1.1607	0.0204	0.3242	0.1084
109	8	5.67	2.2981	0.3667	1.9314	0.1988	0.0796	0.8194	1.1729	0.0262	0.3071	0.1237
110	8	5.67	2.3939	0.4116	1.9823	0.1862	0.0761	0.8421	1.1819	0.0322	0.2901	0.1392
111	8	5.67	2.4855	0.4567	2.0288	0.1741	0.0727	0.8617	1.1879	0.0383	0.2736	0.1547
112	8	5.67	2.5687	0.5013	2.0674	0.1625	0.0694	0.8784	1.1913	0.0445	0.2576	0.17
113	8	5.67	2.6388	0.5443	2.0945	0.1516	0.0661	0.8924	1.1923	0.0505	0.2424	0.185
114	8	5.67	2.6888	0.5839	2.105	0.1414	0.063	0.9039	1.1912	0.0564	0.2279	0.1996
115	8	5.67	2.7177	0.6207	2.0969	0.1321	0.0594	0.915	1.1946	0.0624	0.2147	0.2128
116	8	5.67	2.7848	0.6794	2.1053	0.1253	0.0511	0.94	1.2548	0.071	0.2045	0.2179
117	8	5.67	2.8303	0.7406	2.0897	0.1176	0.0424	0.963	1.3153	0.0805	0.1926	0.2223
118	8	5.67	2.8601	0.8042	2.0559	0.1091	0.0336	0.983	1.3745	0.0909	0.179	0.2254
119	8	5.67	2.8787	0.8707	2.0079	0.0999	0.0251	0.9988	1.4306	0.102	0.1636	0.227
120	8	5.67	2.889	0.9397	1.9493	0.0899	0.0171	1.0097	1.4814	0.1136	0.1466	0.2265
121	8	5.67	2.8929	1.0104	1.8826	0.0795	0.0102	1.0147	1.5248	0.1253	0.1285	0.2236
122	8	5.67	2.892	1.0825	1.8094	0.0689	0.0048	1.0132	1.5587	0.1369	0.1096	0.2181
123	8	5.67	2.8861	1.1547	1.7314	0.0583	0.0013	1.005	1.5813	0.1478	0.0908	0.21
124	8	5.67	2.875	1.2258	1.6492	0.0481	0	0.9899	1.591	0.1579	0.0726	0.1995
125	8	5.67	2.8575	1.2942	1.5634	0.0385	0.0009	0.9683	1.5871	0.1667	0.0558	0.1868
126	8	5.67	2.8318	1.3574	1.4744	0.0299	0.0038	0.9409	1.5693	0.174	0.041	0.1727
127	8	5.67	2.7952	1.4138	1.3813	0.0223	0.0084	0.9084	1.5383	0.1797	0.0284	0.1577
128	8	5.67	2.7439	1.4596	1.2843	0.0159	0.0145	0.872	1.4956	0.1837	0.0184	0.1424
129	8	5.67	2.6738	1.4916	1.1823	0.0107	0.0215	0.8327	1.4432	0.1862	0.0108	0.1275
130	8	5.67	2.579	1.505	1.074	0.0066	0.029	0.7917	1.3837	0.1874	0.0055	0.1134
131	8	5.67	6.4365	3.8641	2.5724	2.3531	0.0507	0.8549	1.4719	0.1957	0.0002	0.0889
132	8	5.67	6.9972	4.3268	2.6704	2.6465	0.0819	0.9161	1.5673	0.2002	0.0133	0.0592
133	8	5.67	7.2911	4.6288	2.6624	2.8184	0.1156	0.935	1.6206	0.1969	0.0468	0.0323
134	8	5.67	6.6984	4.2357	2.4626	2.7695	0.1009	0.7699	1.5077	0.2005	0.0717	0.011
136	8	5.67	5.829	3.6218	2.2072	2.6306	0.0743	0.5623	1.3203	0.2016	0.0938	0.0003
137	8	5.67	4.8801	2.9464	1.9337	2.4239	0.0498	0.3678	1.0905	0.196	0.1163	0.0051
138	8	5.67	1.7444	0.9979	0.7465	0.0006	0.0405	0.2758	0.9632	0.2069	0.1358	0.0134
139	8	5.67	1.8816	1.1372	0.7444	0.002	0.0505	0.302	1.0262	0.2561	0.1533	0.0103
140	8	5.67	2.0173	1.2823	0.735	0.0043	0.0623	0.3303	1.0916	0.3146	0.1728	0.0074
141	8	5.67	2.155	1.434	0.7211	0.0078	0.0759	0.3608	1.1572	0.383	0.1942	0.0048
142	8	5.67	2.2975	1.5927	0.7048	0.0126	0.0916	0.393	1.2209	0.4617	0.2174	0.0026
143	8	5.67	2.4456	1.7581	0.6875	0.019	0.1093	0.4262	1.2797	0.5502	0.2422	0.001
144	8	5.67	2.6011	1.9305	0.6705	0.0269	0.1288	0.4596	1.3309	0.6474	0.2683	0.0002
145	8	5.67	2.7635	2.1089	0.6547	0.0366	0.1502	0.4922	1.372	0.7513	0.2951	0.0001
146	8	5.67	2.9326	2.2919	0.6407	0.0478	0.1729	0.5228	1.4008	0.8594	0.3221	0.001
147	8	5.67	3.1068	2.4778	0.629	0.0604	0.1967	0.5501	1.416	0.9686	0.3486	0.0029
148	8	5.67	3.2844	2.6643	0.6201	0.0741	0.2212	0.5731	1.4167	1.0758	0.374	0.0058
149	8	5.67	3.4623	2.8484	0.6139	0.0884	0.2456	0.5909	1.4028	1.178	0.3975	0.0096
	8	5.67	3.637	3.0262	0.6107	0.103	0.2697	0.6027	1.3751	1.2729	0.4188	0.0143
	8	5.67	3.8035	3.1936	0.6099	0.1174	0.2927	0.6085	1.335	1.3581	0.4373	0.0198
	8	5.67	3.9567	3.3458	0.6108	0.1312	0.3143	0.6084	1.2846	1.4325	0.4528	0.0258
	8	5.67	4.0897	3.4768	0.6129	0.144	0.3342	0.603	1.2262	1.4948	0.4653	0.0322
	8	5.67	4.1943	3.58	0.6144	0.1556	0.3522	0.593	1.1628	1.5447	0.4747	0.0388
	8	5.67	4.261	3.6472	0.6138	0.1659	0.368	0.5796	1.0966	1.5825	0.4813	0.0454
	8	5.67	4.2786	3.6709	0.6077	0.1747	0.3817	0.5636	1.0303	1.6089	0.4853	0.052
	8	5.67	4.2729	3.672	0.601	0.2089	0.3696	0.5592	0.9599	1.6648	0.4944	0.0466
	8	5.67	4.2383	3.6395	0.5988	0.2686	0.3379	0.5596	0.8793	1.7377	0.5048	0.0338
	8	5.67	4.1606	3.5592	0.6014	0.3381	0.3025	0.5542	0.7909	1.7959	0.5098	0.0221
	8	5.67	4.0492	3.4365	0.6127	0.4156	0.264	0.5419	0.6968	1.8333	0.5078	0.0122
	8	5.67	3.9117	3.2766	0.6351	0.4985	0.2237	0.522	0.599	1.845	0.4974	0.0049
	8	5.67	3.7549	3.0851	0.6698	0.5833	0.183	0.494	0.5007	1.8273	0.4779	0.0007
	8	5.67	3.5837	2.8666	0.7172	0.6661	0.1436	0.4583	0.4052	1.7789	0.4497	0
	8	5.67	3.402	2.6261	0.7759	0.7437	0.1073	0.4164	0.3159	1.7006	0.4142	0.0033
	8	5.67	3.2122	2.369	0.8431	0.8137	0.0757	0.3704	0.2357	1.5965	0.3736	0.0099
	8	5.67	3.0144	2.1002	0.9142	0.8745	0.0496	0.3229	0.167	1.473	0.3307	0.0195
	8	5.67	2.8063	1.8243	0.9819	0.9254	0.0294	0.2766	0.1108	1.3389	0.2882	0.0312
	8	5.67	2.6338	1.623	1.0107	0.937	0.0153	0.2411	0.08	1.2335	0.2763	0.0365
	8	5.67	2.4698	1.5015	0.9684	0.8802	0.0056	0.2112	0.0703	1.1482	0.302	0.0285
	8	5.67	2.2284	1.3326	0.8958	0.7913	0.0005	0.1735	0.0587	1.0252	0.3156	0.0193
	8	5.67	1.9729	1.1566	0.8163	0.6906	0.0005	0.137	0.0475	0.8953	0.3226	0.0117
	8	5.67	2.13	1.25	0.88	0.7236	0.0002	0.1326	0.0487	0.969	0.3997	0.0111
	8	5.67	2.2827	1.3376	0.9451	0.7536	0	0.1268	0.0495	1.0434	0.4884	0.0104
	8	5.67	2.4315	1.4183	1.0132	0.7786	0	0.1194	0.0498	1.1158	0.5872	0.0096
	8	5.67	2.5764	1.4921	1.0844	0.7969	0.0001	0.1104	0.0495	1.1836	0.693	0.0088
	8	5.67	2.7157	1.5568	1.1589	0.8067	0.0004	0.1001	0.0485	1.244	0.8017	0.0079
	8	5.67	2.8472	1.611	1.2362	0.8067	0.0009	0.0887	0.0468	1.2946	0.9087	0.007
	8	5.67	2.9677	1.6532	1.3145	0.7967	0.0015	0.0767	0.0444	1.3336	1.0098	0.0061
	8	5.67	3.0725	1.6816	1.3909	0.7768	0.0023	0.0647	0.0414	1.3597	1.1016	0.0052
	8	5.67	3.1556	1.6946	1.4611	0.7481	0.0033	0.0531	0.0379	1.3725	1.1818	0.0043
	8	5.67	3.2083	1.6892	1.519	0.7124	0.0043	0.0424	0.0343	1.3721	1.2492	0.0036
	8	5.67	3.2205	1.6643	1.5562	0.6718	0.0054	0.033	0.0306	1.3595	1.3034	0.0028
	9	5.67	1.2556	0.038	1.2177	0.0002	0.3207	0.0832	0.0001	0.0561	0.7876	0.0144
	9	5.67	1.3885	0.1909	1.1976	0.0003	0.2282	0.1802	0.0027	0.0158	0.973	0.003
	9	5.67	1.6301	0.4725	1.1576	0.0021	0.144	0.3165	0.0127	0	1.1666	0.0002
	9	5.67	1.9788	0.8751	1.1036	0.0057	0.0752	0.4761	0.0304	0.0153	1.3573	0.0072
	9	5.67	2.4089	1.3704	1.0386	0.0108	0.0274	0.6395	0.0544	0.0612	1.534	0.024
	9	5.67	2.874	1.912	0.962	0.0172	0.0033	0.7927	0.0824	0.1297	1.6858	0.0488
	9	5.67	2.7965	1.8158	0.9807	0.0192	0.0052	0.7765	0.0654	0.1147	1.661	0.0523
	9	5.67	2.6956	1.7034	0.9922	0.0217	0.0076	0.7575	0.049	0.0994	1.6312	0.056
	9	5.67	2.5785	1.5795	0.999	0.0244	0.0107	0.7355	0.0338	0.0838	1.5956	0.06
	9	5.67	2.4507	1.448	1.0027	0.0274	0.0145	0.7105	0.0204	0.0683	1.5539	0.0642
	9	5.67	2.3168	1.3115	1.0052	0.0308	0.0193	0.6821	0.0098	0.0532	1.5056	0.0686
	9	5.67	2.1812	1.1737	1.0074	0.0344	0.025	0.6504	0.0027	0.039	1.4503	0.0731
	9	5.67	2.0469	1.0366	1.0103	0.0382	0.0316	0.6155	0.0001	0.0263	1.388	0.0776
	9	5.67	1.917	0.9026	1.0144	0.0421	0.0393	0.5775	0.0029	0.0155	1.3188	0.0821
	9	5.67	1.7941	0.7738	1.0203	0.0462	0.0478	0.5368	0.0118	0.0072	1.243	0.0864
	9	5.67	1.6801	0.6515	1.0286	0.0502	0.0571	0.4939	0.0274	0.0019	1.1614	0.0904
	9	5.67	1.5764	0.5372	1.0392	0.054	0.0669	0.4494	0.0497	0	1.0748	0.094
	9	5.67	1.4845	0.4326	1.0519	0.0576	0.077	0.4043	0.0784	0.0016	0.9848	0.0971
	9	5.67	1.4052	0.338	1.0671	0.0608	0.087	0.3591	0.1129	0.0069	0.8928	0.0996
	9	5.67	1.3389	0.2548	1.0841	0.0635	0.0968	0.3149	0.1519	0.0155	0.8005	0.1014
	9	5.67	1.2856	0.1832	1.1024	0.0657	0.106	0.2725	0.1943	0.0273	0.7097	0.1025
	9	5.67	1.2448	0.1238	1.121	0.0674	0.1144	0.2326	0.2388	0.0417	0.6223	0.103
	9	5.67	1.2152	0.0765	1.1387	0.0686	0.1219	0.1957	0.2843	0.0582	0.5396	0.1028
	9	5.67	1.1947	0.0408	1.1539	0.0692	0.1285	0.1623	0.3295	0.0762	0.4629	0.1021
	9	5.67	1.1808	0.017	1.1638	0.0695	0.1341	0.1325	0.3737	0.0952	0.393	0.1009
	9	5.67	1.1696	0.0037	1.1659	0.0694	0.1387	0.1065	0.4161	0.1145	0.3304	0.0993
	9	5.67	1.1555	0	1.1555	0.0689	0.1425	0.0841	0.4563	0.1339	0.2751	0.0975
	9	5.67	1.1449	0.0023	1.1426	0.0707	0.1518	0.0745	0.4778	0.1513	0.2446	0.0869
	9	5.67	1.1283	0.0079	1.1204	0.0733	0.1637	0.0672	0.496	0.1701	0.218	0.0741
	9	5.67	1.1072	0.0178	1.0894	0.0759	0.1767	0.0598	0.515	0.191	0.1904	0.0613
	9	5.67	1.0856	0.0323	1.0532	0.0786	0.1908	0.0522	0.5348	0.2144	0.1621	0.0489
	9	5.67	1.0668	0.0529	1.0139	0.0814	0.206	0.0446	0.5551	0.2402	0.1335	0.0371
	9	5.67	1.0529	0.0793	0.9735	0.0841	0.2222	0.037	0.5758	0.2685	0.1054	0.0263
	9	5.67	1.046	0.1128	0.9332	0.0868	0.2395	0.0297	0.5966	0.2993	0.0785	0.0168
	9	5.67	1.0475	0.1531	0.8944	0.0894	0.2577	0.0228	0.6171	0.3327	0.0538	0.009
	9	5.67	1.0592	0.2015	0.8577	0.0917	0.2767	0.0165	0.6369	0.3682	0.0323	0.0034
	9	5.67	1.0819	0.2582	0.8237	0.0938	0.2962	0.0109	0.6557	0.4059	0.0154	0.0004
	9	5.67	1.1161	0.3226	0.7935	0.0955	0.316	0.0063	0.6729	0.4452	0.0043	0.0004
	9	5.67	1.1627	0.396	0.7667	0.0968	0.3358	0.0029	0.6882	0.4858	0.0001	0.0036
	9	5.67	1.2222	0.4781	0.744	0.0975	0.3552	0.0007	0.7009	0.5273	0.0038	0.0103
	9	5.67	1.2944	0.5685	0.726	0.0977	0.3739	0	0.7108	0.5691	0.016	0.0207
	9	5.67	1.3796	0.6675	0.7122	0.0973	0.3915	0.0007	0.7174	0.6107	0.0369	0.0346
	9	5.67	1.4778	0.7749	0.7029	0.0963	0.4078	0.003	0.7205	0.6517	0.0659	0.0519
	9	5.67	1.5874	0.8893	0.6981	0.0947	0.4223	0.0068	0.7199	0.6913	0.1024	0.0724
	9	5.67	1.7084	1.0105	0.6979	0.0926	0.435	0.012	0.7157	0.7293	0.1451	0.0956
	9	5.67	1.8392	1.1372	0.702	0.09	0.4456	0.0184	0.7079	0.7652	0.1923	0.121
	9	5.67	1.9784	1.2684	0.71	0.0871	0.4541	0.0259	0.6969	0.7988	0.2426	0.1481
	9	5.67	2.1237	1.4021	0.7216	0.0839	0.4605	0.0342	0.683	0.8296	0.2945	0.1763
	9	5.67	2.2723	1.5363	0.7361	0.0806	0.4648	0.0432	0.6666	0.8576	0.3466	0.2052
	9	5.67	2.4208	1.6678	0.7529	0.0771	0.4673	0.0526	0.6484	0.8826	0.3977	0.2342
	9	5.67	2.5654	1.7946	0.7709	0.0736	0.468	0.0623	0.6288	0.9048	0.4471	0.263
	9	5.67	2.7008	1.9125	0.7883	0.0702	0.4673	0.0721	0.6083	0.924	0.4939	0.2911
	9	5.67	2.821	2.0177	0.8033	0.0668	0.4653	0.0817	0.5874	0.9405	0.5377	0.3182
	9	5.67	2.9192	2.1053	0.8138	0.0636	0.4622	0.0912	0.5664	0.9543	0.5784	0.3443
	9	5.67	2.9523	2.1436	0.8087	0.0612	0.461	0.0982	0.556	0.9587	0.5934	0.3535
	9	5.67	2.874	2.0966	0.7775	0.0604	0.4655	0.0999	0.5691	0.9436	0.5537	0.3253
	9	5.67	2.7698	2.0305	0.7393	0.0594	0.4688	0.1015	0.5817	0.924	0.511	0.2956
	9	5.67	2.6454	1.9481	0.6973	0.0581	0.4706	0.1028	0.5931	0.8995	0.466	0.2645
	9	5.67	2.5061	1.8522	0.6539	0.0566	0.4706	0.1037	0.603	0.8692	0.4186	0.2324
	9	5.67	2.3561	1.7449	0.6112	0.0548	0.4682	0.1042	0.6105	0.8326	0.3698	0.1997
	9	5.67	2.2001	1.6294	0.5707	0.0527	0.4631	0.1041	0.6151	0.7892	0.3199	0.1671
	9	5.67	2.041	1.5072	0.5338	0.0504	0.455	0.1034	0.6161	0.7388	0.2703	0.1353
	9	5.67	1.8827	1.3815	0.5012	0.0478	0.4436	0.1019	0.613	0.6815	0.2216	0.105
	9	5.67	1.7273	1.2528	0.4745	0.0449	0.4289	0.0996	0.6054	0.6178	0.1755	0.0772
	9	5.67	1.5782	1.1245	0.4537	0.0419	0.4109	0.0966	0.5932	0.5491	0.1327	0.0527
	9	5.67	1.4373	0.9978	0.4395	0.0386	0.39	0.0928	0.5762	0.477	0.0948	0.0324
	9	5.67	1.3068	0.8745	0.4323	0.0353	0.3666	0.0883	0.5549	0.404	0.0625	0.0167
	9	5.67	1.188	0.756	0.432	0.0319	0.3414	0.0833	0.5298	0.3328	0.0368	0.0061
	9	5.67	1.0822	0.6437	0.4385	0.0286	0.3149	0.0778	0.5017	0.266	0.0178	0.0007
	9	5.67	0.9902	0.5387	0.4515	0.0254	0.288	0.0722	0.4713	0.2061	0.0059	0.0004
	9	5.67	0.9124	0.442	0.4703	0.0223	0.2613	0.0665	0.4397	0.1543	0.0004	0.0047
	9	5.67	0.8483	0.3546	0.4937	0.0194	0.2354	0.0608	0.4078	0.1114	0.0012	0.0132
	9	5.67	0.7965	0.2766	0.5199	0.0168	0.2109	0.0554	0.3764	0.077	0.0071	0.025
	9	5.67	0.7549	0.2086	0.5463	0.0143	0.1879	0.0502	0.3459	0.0506	0.0178	0.0396
	9	5.67	0.7203	0.1506	0.5697	0.0121	0.1668	0.0454	0.3172	0.0309	0.0319	0.0563
	9	5.67	0.7158	0.166	0.5498	0.011	0.1646	0.0516	0.3213	0.0365	0.0308	0.0476
	9	5.67	0.7067	0.1824	0.5243	0.0098	0.162	0.0587	0.3256	0.043	0.0296	0.039
	9	5.67	0.6946	0.1993	0.4952	0.0086	0.1592	0.0669	0.33	0.0505	0.0282	0.0306
	9	5.67	0.6818	0.2175	0.4642	0.0074	0.1559	0.0762	0.3343	0.0593	0.0268	0.0227
	9	5.67	0.6693	0.2366	0.4327	0.0061	0.1523	0.0868	0.3387	0.0694	0.0253	0.0154
	9	5.67	0.6587	0.257	0.4017	0.005	0.1482	0.0988	0.3429	0.0811	0.0237	0.0092
	9	5.67	0.6506	0.2791	0.3716	0.0038	0.1437	0.1123	0.3469	0.0944	0.022	0.0043
	9	5.67	0.6458	0.3024	0.3434	0.0028	0.1387	0.1276	0.3507	0.1096	0.0202	0.0011
	9	5.67	0.6448	0.3274	0.3174	0.0019	0.1332	0.1446	0.3541	0.1269	0.0183	0
	9	5.67	0.6481	0.3539	0.2942	0.0011	0.1271	0.1634	0.3571	0.1463	0.0164	0.0015
	9	5.67	0.6559	0.382	0.2739	0.0005	0.1205	0.1841	0.3594	0.1678	0.0144	0.0061
	9	5.67	0.6693	0.4124	0.257	0.0001	0.1134	0.2067	0.3611	0.1917	0.0125	0.0142
	9	5.67	0.6877	0.4443	0.2434	0	0.1059	0.2309	0.362	0.2176	0.0105	0.0264
	9	5.67	0.712	0.4786	0.2334	0.0002	0.0978	0.2567	0.362	0.2456	0.0086	0.043
	9	5.67	0.7419	0.5145	0.2274	0.0007	0.0895	0.2836	0.361	0.2752	0.0068	0.0644
	9	5.67	0.778	0.5527	0.2252	0.0016	0.0809	0.3114	0.3589	0.3062	0.0052	0.0906
	9	5.67	0.8201	0.5928	0.2273	0.0029	0.0721	0.3398	0.3557	0.3381	0.0037	0.1216
	9	5.67	0.8685	0.635	0.2335	0.0046	0.0634	0.368	0.3514	0.3704	0.0024	0.1573
	9	5.67	0.9233	0.6793	0.244	0.0067	0.0548	0.3959	0.3459	0.4025	0.0014	0.1973
	9	5.67	0.9845	0.7253	0.2592	0.0091	0.0466	0.4228	0.3392	0.4341	0.0006	0.2408
	9	5.67	1.0519	0.7733	0.2786	0.0119	0.0388	0.4483	0.3315	0.4644	0.0002	0.2873
	9	5.67	1.1256	0.8229	0.3027	0.015	0.0316	0.4722	0.3229	0.4932	0	0.336
	9	5.67	1.2054	0.874	0.3314	0.0183	0.0251	0.4942	0.3134	0.5201	0.0001	0.3859
	9	5.67	1.2911	0.9264	0.3647	0.0218	0.0193	0.514	0.3033	0.5448	0.0005	0.4364
	9	5.67	1.3821	0.9794	0.4027	0.0254	0.0143	0.5316	0.2925	0.5671	0.0011	0.4865
	9	5.67	1.478	1.0328	0.4452	0.0291	0.0102	0.547	0.2814	0.587	0.002	0.5356
	9	5.67	1.578	1.0861	0.4919	0.0328	0.0068	0.56	0.27	0.6042	0.003	0.5831
	9	5.67	1.6816	1.1389	0.5427	0.0365	0.0042	0.5709	0.2586	0.619	0.0042	0.6286
	9	5.67	1.7872	1.1903	0.5969	0.0401	0.0023	0.5798	0.2472	0.6314	0.0055	0.6716
	9	5.67	1.8937	1.2394	0.6543	0.0435	0.001	0.5869	0.2359	0.6415	0.0068	0.7118
	9	5.67	1.999	1.2852	0.7139	0.0468	0.0003	0.5922	0.2249	0.6495	0.0082	0.7491
	9	5.67	2.1011	1.3268	0.7743	0.0499	0	0.596	0.2143	0.6556	0.0097	0.7834
	9	5.67	2.1971	1.3627	0.8345	0.0529	0.0002	0.5985	0.204	0.6599	0.0111	0.8147
	9	5.67	2.2839	1.3916	0.8923	0.0557	0.0006	0.5999	0.1942	0.6628	0.0126	0.843
	9	5.67	2.3572	1.4125	0.9447	0.0582	0.0014	0.6003	0.1849	0.6643	0.0139	0.8684
	9	5.67	2.4115	1.4227	0.9888	0.0607	0.0023	0.5999	0.176	0.6647	0.0153	0.8911
	9	5.67	2.4274	1.4203	1.0071	0.064	0.0032	0.599	0.167	0.6582	0.0173	0.902
	9	5.67	2.2903	1.3901	0.9001	0.078	0.0021	0.5937	0.1497	0.5924	0.0252	0.8214
	9	5.67	2.1223	1.3363	0.786	0.0934	0.0012	0.5786	0.13	0.5191	0.0352	0.7283
	9	5.67	1.9351	1.261	0.6741	0.1099	0.0005	0.5525	0.1084	0.4402	0.0466	0.6251
	9	5.67	1.7394	1.1677	0.5717	0.1268	0.0001	0.5155	0.0861	0.3589	0.0594	0.516
	9	5.67	1.545	1.0605	0.4845	0.1434	0.0001	0.469	0.0646	0.2792	0.0728	0.4069
	9	5.67	1.3613	0.9449	0.4164	0.1592	0.0004	0.416	0.0453	0.2058	0.0864	0.3045
	9	5.67	1.1943	0.8253	0.369	0.1737	0.0011	0.3601	0.0292	0.1422	0.0994	0.2147
	9	5.67	1.1113	0.7786	0.3328	0.1782	0.002	0.3339	0.0263	0.1139	0.1125	0.1597
	9	5.67	1.1272	0.8391	0.2881	0.1691	0.0031	0.3524	0.0417	0.1247	0.128	0.1373
	9	5.67	1.1423	0.8986	0.2438	0.1589	0.0045	0.3719	0.0621	0.1367	0.1455	0.1147
	9	5.67	1.16	0.9574	0.2026	0.1474	0.0064	0.3922	0.0882	0.1498	0.1651	0.0923
	9	5.67	1.1824	1.0154	0.167	0.1349	0.0087	0.4133	0.1206	0.1639	0.187	0.0708
	9	5.67	1.2113	1.0728	0.1385	0.1213	0.0115	0.4347	0.1601	0.1788	0.2109	0.0508
	9	5.67	1.2485	1.1299	0.1187	0.1067	0.0148	0.4562	0.2071	0.1944	0.2368	0.0331
	9	5.67	1.2954	1.1865	0.1089	0.0916	0.0186	0.4773	0.2618	0.2103	0.2642	0.0183
	9	5.67	1.3531	1.2428	0.1104	0.0762	0.023	0.4976	0.3241	0.2261	0.2927	0.0075
	9	5.67	1.4225	1.2988	0.1237	0.0611	0.0279	0.5166	0.3936	0.2413	0.3216	0.0013
	9	5.67	1.504	1.3542	0.1498	0.0467	0.0333	0.5339	0.4695	0.2553	0.3503	0.0003
	9	5.67	1.5981	1.4092	0.189	0.0336	0.039	0.5491	0.5507	0.2678	0.3778	0.0051
	9	5.67	1.7046	1.463	0.2416	0.0222	0.045	0.5617	0.6358	0.2783	0.4036	0.0158
	9	5.67	1.8231	1.5155	0.3076	0.0131	0.0512	0.5715	0.7234	0.2866	0.427	0.0322
	9	5.67	1.9524	1.5659	0.3865	0.0063	0.0574	0.5784	0.8119	0.2924	0.4474	0.0538
	9	5.67	2.0916	1.6138	0.4778	0.002	0.0636	0.5823	0.9	0.2959	0.4647	0.0801
	9	5.67	2.2379	1.6578	0.5801	0.0001	0.0696	0.5833	0.9862	0.2971	0.4786	0.11
	9	5.67	2.3887	1.6973	0.6914	0.0004	0.0753	0.5815	1.0696	0.2962	0.4893	0.1426
	9	5.67	2.5394	1.7302	0.8092	0.0025	0.0806	0.5772	1.1493	0.2936	0.4969	0.177
	9	5.67	2.6844	1.7546	0.9298	0.0061	0.0855	0.5707	1.2245	0.2895	0.5016	0.2122
	9	5.67	2.8164	1.7684	1.048	0.0108	0.09	0.5625	1.2947	0.2842	0.5039	0.2475
	9	5.67	2.9253	1.7681	1.1572	0.0163	0.0941	0.5527	1.3597	0.2782	0.504	0.2823
	9	5.67	2.9647	1.754	1.2107	0.0286	0.0984	0.5499	1.318	0.2877	0.5475	0.3113
	9	5.67	2.9199	1.7058	1.2141	0.0507	0.1012	0.5443	1.1812	0.3033	0.6187	0.3316
	9	5.67	2.8188	1.62	1.1989	0.0789	0.1011	0.5283	1.0134	0.3102	0.6816	0.3426
	9	5.67	2.6681	1.4987	1.1694	0.1111	0.0978	0.5023	0.8227	0.3062	0.7303	0.3427
	9	5.67	2.4707	1.3446	1.1261	0.1447	0.0915	0.4676	0.6258	0.2906	0.7589	0.3322
	10	5.67	2.7117	1.1779	1.5338	0.1005	1.0877	0.0011	0.339	1.1217	0.1976	0.0037
	10	5.67	2.7264	1.1361	1.5903	0.1225	1.0879	0.0026	0.3344	1.1244	0.2146	0.0036
	10	5.67	2.7247	1.0868	1.6379	0.1483	1.084	0.0047	0.3284	1.1241	0.233	0.0036
	10	5.67	2.7109	1.0311	1.6798	0.1781	1.0752	0.0078	0.3209	1.1204	0.2524	0.0035
	10	5.67	2.6885	0.9702	1.7183	0.2119	1.0606	0.0118	0.3116	1.1124	0.2725	0.0034
	10	5.67	2.6602	0.905	1.7551	0.2495	1.0396	0.017	0.3006	1.0997	0.293	0.0033
	10	5.67	2.6284	0.837	1.7914	0.2904	1.0117	0.0233	0.2877	1.0818	0.3133	0.0031
	10	5.67	2.5952	0.7671	1.8281	0.3338	0.9765	0.0307	0.273	1.0584	0.3327	0.0029
	10	5.67	2.5619	0.6962	1.8657	0.3787	0.9344	0.0392	0.2566	1.0292	0.3506	0.0027
	10	5.67	2.5299	0.6259	1.9041	0.4238	0.8858	0.0484	0.2388	0.9944	0.3663	0.0025
	10	5.67	2.499	0.5562	1.9429	0.4678	0.8315	0.0582	0.2199	0.9542	0.3793	0.0023
	10	5.67	2.4698	0.4885	1.9813	0.5096	0.7729	0.0682	0.2004	0.9093	0.389	0.002
	10	5.67	2.4414	0.4238	2.0176	0.548	0.7115	0.0782	0.1805	0.8605	0.3954	0.0018
	10	5.67	2.4124	0.3623	2.05	0.5823	0.6489	0.0879	0.161	0.8088	0.3984	0.0015
	10	5.67	2.3804	0.3048	2.0756	0.6118	0.5867	0.097	0.142	0.7554	0.3981	0.0013
	10	5.67	2.3419	0.2522	2.0897	0.6365	0.5264	0.1054	0.1241	0.7014	0.3949	0.0011
	10	5.67	2.2921	0.2048	2.0873	0.6564	0.469	0.1131	0.1075	0.648	0.3893	0.0009
	10	5.67	2.2241	0.1627	2.0614	0.6716	0.4154	0.1199	0.0923	0.5961	0.3817	0.0008
	10	5.67	2.2059	0.1478	2.0581	0.6537	0.3967	0.1302	0.079	0.6001	0.3949	0.0016
	10	5.67	2.1688	0.1323	2.0365	0.6341	0.3767	0.1418	0.0658	0.6038	0.409	0.0029
	10	5.67	2.118	0.116	2.0021	0.6127	0.3554	0.1545	0.053	0.6069	0.4237	0.0046
	10	5.67	2.0587	0.0995	1.9592	0.5895	0.333	0.1685	0.0408	0.6093	0.4392	0.0069
	10	5.67	1.994	0.0829	1.9111	0.5642	0.3094	0.1839	0.0295	0.6107	0.4554	0.0099
	10	5.67	1.9277	0.0676	1.8601	0.537	0.2848	0.2006	0.0194	0.6109	0.4721	0.0137
	10	5.67	1.8615	0.0526	1.8088	0.5077	0.2593	0.2189	0.0111	0.6094	0.4892	0.0183
	10	5.67	1.7976	0.0391	1.7585	0.4765	0.2333	0.2386	0.0047	0.6062	0.5064	0.0239
	10	5.67	1.7378	0.0272	1.7106	0.4433	0.2068	0.2598	0.001	0.6007	0.5237	0.0306
	10	5.67	1.6833	0.0172	1.6661	0.4083	0.1804	0.2824	0.0002	0.5928	0.5408	0.0384
	10	5.67	1.6351	0.0093	1.6259	0.3719	0.1543	0.3062	0.0029	0.5821	0.5573	0.0473
	10	5.67	1.594	0.0034	1.5906	0.3343	0.1289	0.3311	0.0095	0.5684	0.5731	0.0576
	10	5.67	1.561	0.0004	1.5607	0.2959	0.1047	0.3569	0.0204	0.5515	0.5877	0.069
	10	5.67	1.5366	0	1.5367	0.2574	0.0822	0.3833	0.0357	0.5314	0.6008	0.0815
	10	5.67	1.5212	0.0023	1.5189	0.2193	0.0617	0.4099	0.0558	0.5081	0.6124	0.0951
	10	5.67	1.5154	0.0081	1.5073	0.1824	0.0437	0.4363	0.0805	0.482	0.6219	0.1095
	10	5.67	1.519	0.0166	1.5024	0.1475	0.0285	0.4622	0.1098	0.4532	0.6294	0.1246
	10	5.67	1.5327	0.0284	1.5043	0.1152	0.0165	0.487	0.1433	0.4223	0.6347	0.1401
	10	5.67	1.5564	0.0433	1.5131	0.0863	0.0077	0.5104	0.1806	0.3899	0.6376	0.1558
	10	5.67	1.59	0.0615	1.5284	0.0613	0.0022	0.5319	0.2212	0.3568	0.6383	0.1714
	10	5.67	1.6332	0.0825	1.5507	0.0406	0.0001	0.5512	0.2645	0.3234	0.6368	0.1868
	10	5.67	1.6859	0.1069	1.579	0.0243	0.0012	0.5681	0.3096	0.2907	0.6333	0.2016
	10	5.67	1.7473	0.134	1.6133	0.0124	0.0052	0.5822	0.356	0.2591	0.6278	0.2159
	10	5.67	1.8168	0.1638	1.653	0.0046	0.012	0.5935	0.4029	0.2293	0.6206	0.2292
	10	5.67	1.8932	0.1959	1.6973	0.0007	0.0212	0.6021	0.4497	0.2014	0.612	0.2418
	10	5.67	1.9746	0.2296	1.745	0.0001	0.0325	0.6078	0.4959	0.1759	0.6022	0.2533
	10	5.67	2.0594	0.2649	1.7946	0.0024	0.0454	0.6111	0.541	0.1528	0.5915	0.2639
	10	5.67	2.1449	0.3009	1.844	0.0071	0.0597	0.612	0.5845	0.1321	0.58	0.2735
	10	5.67	2.2274	0.3368	1.8906	0.0137	0.075	0.6109	0.6262	0.1137	0.5681	0.2822
	10	5.67	2.3024	0.3711	1.9313	0.0219	0.091	0.6081	0.6658	0.0976	0.5558	0.29
	10	5.67	2.3643	0.4032	1.9611	0.0312	0.1074	0.6039	0.7032	0.0834	0.5434	0.2969
	10	5.67	2.4052	0.4309	1.9742	0.0414	0.124	0.5986	0.7382	0.0712	0.531	0.303
	10	5.67	4.868	1.344	3.524	1.1947	0.1291	0.5991	0.7792	0.0746	0.5197	0.3255
	10	5.67	5.1627	1.4246	3.7382	1.4014	0.1286	0.5982	0.822	0.0854	0.5052	0.3566
	10	5.67	5.4268	1.4949	3.9319	1.6288	0.1269	0.5911	0.8609	0.097	0.4857	0.3881
	10	5.67	5.6647	1.5547	4.11	1.872	0.1238	0.5766	0.8935	0.109	0.4606	0.4183
	10	5.67	5.8804	1.6051	4.2753	2.1241	0.1191	0.5538	0.9174	0.1201	0.4297	0.4456
	10	5.67	6.0748	1.646	4.4288	2.3776	0.1129	0.5227	0.9307	0.1296	0.3934	0.4681
	10	5.67	6.2474	1.6776	4.5698	2.6246	0.1051	0.4838	0.9324	0.1362	0.3527	0.4844
	10	5.67	6.3953	1.7001	4.6952	2.8586	0.0962	0.4387	0.9223	0.1394	0.3088	0.4935
	10	5.67	6.5138	1.7135	4.8003	3.074	0.0864	0.3897	0.901	0.1389	0.2639	0.4949
	10	5.67	6.5942	1.718	4.8762	3.2663	0.0763	0.3393	0.8698	0.1353	0.2198	0.489
	10	5.67	6.6235	1.7129	4.9106	3.4324	0.0663	0.2901	0.8309	0.1292	0.1787	0.4768
	10	5.67	6.5815	1.697	4.8845	3.5704	0.0568	0.2441	0.7864	0.1217	0.1418	0.4595
[truncated: 114 more rows]
[truncated: 17 more columns]

## Sheet: Table 1
Table 1. Means and effects of QTL genotypes in multi-environmental trials
QTL genotype	Environment					Genotypic mean	Genotypic effect
	E1	…	Eh	…	Ee
QQ		…		…
qq		…		…
Environmental mean		…		…
Environmental effect		…		…

## Sheet: Table 2
Table 2. Means and effects of QTL genotypes in a DH population
	Environment
QTL genotype	E1	E2	E3	E4	Genotypic mean	Genotypic effect
QQ	14	10	12	16	13	0.3
qq	12	10	17	11	12.5	-0.2
Environmental mean	12.8	10	15	13	12.7
Environmental effect	0.1	-2.7	2.3	0.3
(1)using QEI							(2)using additive effect
	0.9	-0.3	-3.3	2.7	1.908
	-0.6	0.2	2.2	-1.8	1.272			additive effect	1	0	-2.5	2.5	V(A)	PVE(A)
					3.18	0.1272		average effect	0.25				0.06	0.0024
					V(AE)	PVE(AE)			0.75	-0.25	-2.75	2.25
								V(AE)	3.18
								PVE(AE)	0.1272

## Sheet: Table 3
Table 3. Predefined chromosomal positions and additive effects of five unlinked QTL
QTL	Chr.	Pos. (cM)	A	AE1	AE2	PVEA (%)	PVEAE (%)	PVE (%)
Q1	1	16	0.5	0	0	12.5	0	12.5
Q2	2	3	0	0.5	-0.5	0	12.5	12.5
Q3	3	33	0.25	-0.25	0.25	3.13	3.13	6.25
Q4	4	26	0.25	0.25	-0.25	3.13	3.13	6.25
Q5	5	35	0.5	0	0	12.5	0	12.5
QTL	Chr.	Pos. (cM)	Average effect	AddbyE1	AddbyE2	PVE(A) (%)	PVE(AbyE) (%)	PVE (%)
Q1	1	16	0.5	0	0	0.125	0	0.125
Q2	2	3	0	0.5	-0.5	0	0.125	0.125
Q3	3	33	0.25	-0.25	0.25	0.03125	0.03125	0.0625
Q4	4	26	0.25	0.25	-0.25	0.03125	0.03125	0.0625
Q5	5	35	0.5	0	0	0.125	0	0.125
	additive effect	E1	E2
	Q1	0.5	0.5
	Q2	0.5	-0.5
	Q3	0	0.5
	Q4	0.5	0
	Q5	0.5	0.5
	Vg	1	1
	Vp	2	2	2	VP

[truncated: 5 more sheets: Table 4, Table 5, Table 6, Table 7, Table 8]
